# Supplementary material for: Specific alternative splicing and polyadenylation facilitate metastasis mediated by CTC clusters
Source: Research Square preprint supplement (doi:10.21203/rs.3.rs-1128296/v1), 2021-12-07
Supplement: Supplementary file 1 [file 01bc88e72571022ebf525ed9.xlsx]

## Sheet: splicing_factor_from_splicingAi
Table S2. Splicing factors collected from SpliceAid2
ENSEMBL	Gene_Symbol
ENSG00000115875	SRSF7
ENSG00000149187	CELF1
ENSG00000071626	DAZAP1
ENSG00000104413	ESRP1
ENSG00000103067	ESRP2
ENSG00000048740	CELF2
ENSG00000102081	FMR1
ENSG00000078328	RBFOX1
ENSG00000100320	RBFOX2
ENSG00000177733	HNRNPA0
ENSG00000135486	HNRNPA1
ENSG00000122566	HNRNPA2B1
ENSG00000170144	HNRNPA3
ENSG00000092199	HNRNPC
ENSG00000138668	HNRNPD
ENSG00000152795	HNRNPDL
ENSG00000169564	PCBP1
ENSG00000197111	PCBP2
ENSG00000169813	HNRNPF
ENSG00000147274	RBMX
ENSG00000169045	HNRNPH1
ENSG00000126945	HNRNPH2
ENSG00000096746	HNRNPH3
ENSG00000011304	PTBP1
ENSG00000165119	HNRNPK
ENSG00000104824	HNRNPL
ENSG00000143889	HNRNPLL
ENSG00000099783	HNRNPM
ENSG00000089280	FUS
ENSG00000135316	SYNCRIP
ENSG00000153187	HNRNPU
ENSG00000164548	TRA2A
ENSG00000136527	TRA2B
ENSG00000107105	ELAVL2
ENSG00000196361	ELAVL3
ENSG00000162374	ELAVL4
ENSG00000066044	ELAVL1
ENSG00000088247	KHSRP
ENSG00000152601	MBNL1
ENSG00000139910	NOVA1
ENSG00000104967	NOVA2
ENSG00000117569	PTBP2
ENSG00000116560	SFPQ
ENSG00000112531	QKI
ENSG00000119707	RBM25
ENSG00000173933	RBM4
ENSG00000003756	RBM5
ENSG00000121774	KHDRBS1
ENSG00000115524	SF3B1
ENSG00000161547	SRSF2
ENSG00000168066	SF1
ENSG00000136450	SRSF1
ENSG00000112232	KHDRBS2
ENSG00000131773	KHDRBS3
ENSG00000133226	SRRM1
ENSG00000112081	SRSF3
ENSG00000111786	SRSF9
ENSG00000188529	SRSF10
ENSG00000100650	SRSF5
ENSG00000116754	SRSF11
ENSG00000124193	SRSF6
ENSG00000116350	SRSF4
ENSG00000120948	TARDBP
ENSG00000116001	TIA1
ENSG00000151923	TIAL1
ENSG00000065978	YBX1
ENSG00000132485	ZRANB2
