# Supplementary material for: Specific alternative splicing and polyadenylation facilitate metastasis mediated by CTC clusters
Source: Research Square preprint supplement (doi:10.21203/rs.3.rs-1128296/v1), 2021-12-07
Supplement: Supplementary file 2 [file a4d459a38798fb940899a36d.xlsx]

## Sheet: Sheet1
Table S4. Comparasion between 3'UTR lengthening genes in CTC clusters and in senescent cells
3’ UTR lengthening genes in CTC clusters				3’ UTR lengthening genes in senescent cells
APA_ID	delta PDUI	Gene_Symbol		Gene_Symbol
NM_000099	0.09	CST3		MAPRE2
NM_000101	0.156992	CYBA		UBE2L5
NM_000310	0.0164692	PPT1		GET4
NM_001005354	0.04	PRR13		WDR13
NM_001013653	0.329949	LRRC26		RPS6KA3
NM_001014763	0.0918071	ETFB		SUCLA2
NM_001018004	0.447147	TPM1		CDK16
NM_001024960	0.29	ARPC4		GFER
NM_001040431	0.07	COA3		ADAMTS1
NM_001042472	0.439979	ABHD12		SMAD4
NM_001077399	0.127704	PNKD		CDH2
NM_001122955	0.244748	BSCL2		LRCH1
NM_001134321	0.272099	RTL8A		GPC6
NM_001135694	0.0907575	VDAC3		ZNF397
NM_001135998	0.04	NDUFB11		NUDT5
NM_001139457	0.06	BCAP31		RUNX1
NM_001142418	0.125219	MORF4L2		ZMYM5
NM_001143841	0.0503513	TMEM106C		ITGA9
NM_001145145	0.0451526	SLC1A5		SPART
NM_001164189	0.109396	PLIN3		CDKN2B
NM_001170406	0.111996	CDK1		EAPP
NM_001184730	0.23	PIGT		WIPI2
NM_001185012	0.01	NDUFA2		WBP4
NM_001185077	0.08	ARHGDIA		PIP4K2A
NM_001190472	0.0933568	MTRNR2L3		CERK
NM_001190996	0.06	ARPC1A		FAM124A
NM_001191003	0.0855493	GSTO1		TNKS2
NM_001198868	0.419805	CAPN1		VPS36
NM_001220777	0.0913927	CDKN1A		PIGL
NM_001242375	0.0353734	ANAPC13		PUSL1
NM_001242831	0.259745	ELOVL5		PSMC6
NM_001254738	0.0400444	RND3		NSA2
NM_001256534	0.03	SLC25A1		MFAP5
NM_001267558	0.03	PDCD6		HOOK3
NM_001270987	0.223194	LTBR		GTF2E2
NM_001271849	0.145538	CDK2AP2		TFIP11
NM_001278712	0.0138188	ATG3		STX16
NM_001280557	0.15	SLC39A4		STX16-NPEPL1
NM_001280789	0.22	SURF4		ME1
NM_001281512	0.0837447	HADHB		RAB22A
NM_001282205	0.116287	SIGMAR1		SRSF6
NM_001282576	0.107786	UBE2V1		PMEPA1
NM_001282674	0.05	BEX3		SKI
NM_001284239	0.209415	SARAF		RBM25
NM_001286416	0.04	SUMO3		BCAT1
NM_001288565	0.05	TMEM9		MYOF
NM_001288610	0.01	JPT1		SERINC3
NM_001288659	0.04	METTL9		ANLN
NM_001288660	0.04	METTL9		TBC1D1
NM_001293213	0.0370276	TUBB		UBE2L3
NM_001301241	0.227023	ARHGDIA		EMB
NM_001303062	0.0572154	TMED4		NIPA1
NM_001303507	0.194427	PPP4C		GHITM
NM_001308036	0.113265	NCBP2		DAAM2
NM_001313858	0.0743734	ARL6IP1		YWHAQ
NM_001317783	0.02	TSTA3		MSL1
NM_001318485	0.0868533	MRPL20		DDA1
NM_001319081	0.111148	HMGA1		TCEAL8
NM_001320628	0.0535636	BOLA2-SMG1P6		C11orf58
NM_001320778	0.250361	SCAMP2		RRAS2
NM_001323960	0.16	RBCK1		TCEA1
NM_001330284	0.191504	MZT2B		SOCS6
NM_001352773	0.0277786	JUP		CALM1
NM_001359651	0.120123	PEF1		UBQLN1
NM_001363695	0.01	PPT1		TIAM1
NM_001363697	0.287184	RPL28		NEDD9
NM_001363994	0.0204581	CANX		MLST8
NM_001364126	0.295413	CLTB		CYCS
NM_001364239	0.09	HNRNPH1		PCGF2
NM_001365754	0.256379	MIF4GD		ATP10A
NM_001366994	0.11	IFI27		HIP1
NM_001985	0.0974201	ETFB		PARP11
NM_002087	0.15	GRN		ZFAND3
NM_002116	0.06	HLA-A		APTX
NM_002139	0.11546	RBMX		ASAP3
NM_002629	0.17	PGAM1		ANP32B
NM_002773	0.04	PRSS8		MTUS2
NM_002808	0.11	PSMD2		RARA
NM_002939	0.124116	RNH1		MYL12B
NM_003374	0.062343	VDAC1		API5
NM_003407	0.400517	ZFP36		NAPG
NM_003641	0.13	IFITM1		CD59
NM_003731	0.250689	SSNA1		SUB1
NM_003757	0.01	EIF3I		SLC25A32
NM_003776	0.308113	MRPL40		ETS1
NM_003827	0.110106	NAPA		GTPBP8
NM_004223	0.32	UBE2L6		ZYG11B
NM_004335	0.03	BST2		SEC63
NM_004339	0.0734476	PTTG1IP		MED13
NM_004450	0.00928236	ERH		LTBP1
NM_005817	0.104567	PLIN3		RBM22
NM_005911	0.261172	MAT2A		LMAN2
NM_006327	0.07	TIMM23		ZZZ3
NM_006339	0.06	HMG20B		CXCL14
NM_006815	0.0123496	TMED2		YAP1
NM_007065	0.116811	CDC37		SARDH
NM_007285	0.07	GABARAPL2		NOLC1
NM_012203	0.2	GRHPR		HIPK1
NM_012325	0.0337265	MAPRE1		FSTL1
NM_012391	0.261222	SPDEF		BTAF1
NM_013258	0.0886282	PYCARD		TM4SF1
NM_013336	0.306661	SEC61A1		RAB23
NM_014187	0.095927	TMEM208		RAB2A
NM_014399	0.0777948	TSPAN13		PI15
NM_015161	0.0743734	ARL6IP1		SP2
NM_015388	0.0814837	YIPF3		SEC22B
NM_015391	0.0353734	ANAPC13		DYNC1LI2
NM_015966	0.0236964	ERGIC3		HSPA12A
NM_015971	0.0302667	MRPS7		IDH3A
NM_016062	0.124062	CIAO2B		ASPN
NM_016127	0.211262	SARAF		UBE2B
NM_016145	0.02	WDR83OS		SRPK2
NM_016199	0.0140296	LSM7		HOXB9
NM_016286	0.05	DCXR		BTBD1
NM_016491	0.118852	MRPL37		ARHGAP24
NM_016504	0.06	MRPL27		GABARAPL2
NM_016639	0.0384193	TNFRSF12A		SNUPN
NM_017907	0.1	LAMTOR1		CCDC47
NM_018445	0.149577	SELENOS		FAM76B
NM_018453	0.205938	EAPP		ZNF346
NM_018670	0.513532	MESP1		SURF4
NM_018946	0.02	NANS		EYA3
NM_019613	0.101483	WDR45B		SPAG9
NM_020532	0.0594891	RTN4		CASK
NM_020992	0.0726754	PDLIM1		RXRA
NM_021034	0.01	IFITM3		HSPA4
NM_022044	0.189495	SDF2L1		EDNRA
NM_024071	0.267155	ZFYVE21		YIPF5
NM_024112	0.225276	C9orf16		MLEC
NM_030939	0.00904413	C6orf62		IL6ST
NM_031298	0.35571	EMC6		LIX1L
NM_031991	0.245339	PTBP1		MRPL50
NM_032272	0.09	MAF1		SC5D
NM_032360	0.0939893	ACBD6		MARK4
NM_032476	0.122991	MRPS6		OXCT1
NM_032901	0.07	COX14		NUDCD2
NM_033504	0.0923626	TMEM54		MAP3K7
NM_053050	0.18	MRPL53		SLC6A8
NM_053275	0.07	RPLP0		ACTR10
NM_138610	0.451891	H2AFY		NIPSNAP3A
NM_138820	0.0339419	HIGD2A		DLGAP4
NM_153280	0.274891	UBA1		CNN3
NM_153824	0.197706	PYCR1		COPG2
NM_175932	0.05	PSMD13		RCC2
NM_181652	0.07	PRDX5		PGRMC2
NM_181800	0.345273	UBE2C		KCMF1
NM_182685	0.03	EFNA1		PPP2CA
NM_198976	0.419256	NELFCD		TMED10
NM_199184	0.277297	DNPH1		MMP14
NR_024629	0.266493	IDI2-AS1		AP3S1
NR_028370	0.119885	PCNA-AS1		OSBPL9
NR_031762	0.409467	HCP5B		NFIA
NR_038286	0.15321	PSMD6-AS2		DENND2A
NR_038894	0.454878	CBR3-AS1		BNIP3
NR_046633	0.380916	NUCB1-AS1		OSBPL8
NR_049759	0.01	IFITM3		PTN
NR_073084	0.03	CRIP2		RNF115
NR_104029	0.06	DGUOK-AS1		DOCK7
NR_109875	0.366875	LOC101927100		FGFR1OP2
NR_110730	0.30831	PTOV1-AS2		YWHAZ
NR_120608	0.0501775	TUBB		GCLM
NR_134538	0.515301	C7orf50		PLAA
NR_134848	0.141138	GAA		WDR77
NR_134869	0.351632	HEXA		BAIAP2L1
NR_135305	0.08	SMG1P2		HCFC2
NR_136587	0.0145368	RBM39		VPS33A
NR_144447	0.317807	ZNF8-ERVK3-1		ERGIC1
NR_157088	0.308816	CLTB		ZFP36
				HNRNPAB
				DNTTIP1
				AMOTL1
				WTIP
				BCAS2
				RACGAP1
				YEATS4
				PACS2
				SRP54
				ANXA7
				TBC1D17
				SRP72
				UBXN7
				SAMD4A
				OS9
				SLC35B4
				CACHD1
				CHIC2
				ACOT9
				SAR1A
				HSDL2
				SCAF11
				STRN
				USP24
				DNAJC16
				CCNH
				SEC62
				SNX2
				MRAS
				PAPPA
				ZBTB7B
				OSTC
				ADAMTS6
				NUS1
				BRAF
				TMEM168
				OAT
				VARS2
				OGN
				UBE2H
				DPP8
				UTP6
				RWDD4
				RAB10
				IRF2BP2
				XPO1
				UGCG
				PIGM
				OTUD3
				RTF1
				PIGB
				HSPA9
				SYNC
				MYG1
				DCAF7
				CDK7
				ATF6
				PARVA
				HIGD1A
				DCP2
				EGLN1
				SSB
				STARD5
				GSK3B
				DDX46
				EIF5B
				PRKAR1A
				DDR2
				NPLOC4
				RSRC2
				PDK1
				BTF3L4
				CENPF
				CGGBP1
				C1orf198
				VPS29
				BZW1
				ANAPC1
				RIPK1
				PRKACB
				NQO2
				DYNLL2
				SCRN1
				ROCK2
				MTMR4
				CARHSP1
				UBXN6
				BRMS1L
				RHOA
				SOS1
				ZNF106
				CCDC93
				REEP5
				NSG1
				ZNF281
				EIF4EBP2
				TOMM20
				ANP32E
				HNRNPF
				LOX
				FOXP1
				EIF4G2
				SP3
				OXR1
				THRA
				SRI
				RAB7A
				FUBP1
				PHF12
				TTC9C
				UXS1
				WNT5A
				SYF2
				SRFBP1
				NR2C1
				CTSB
				CPNE2
				SCO1
				SFT2D2
				ISOC1
				WDR26
				NFYB
				CCZ1B
				CCZ1
				NEDD4
				CREG1
				TRIP12
				PTPRD
				MAPKAPK2
				DEGS1
				MRPL10
				EXOC6B
				BCL9L
				ANXA3
				ACTN1
				PRDX2
				CYB5B
				GADD45B
				FRS2
				EXOC7
				KIF3A
				RAC1
				CDC73
				SFXN3
				BTG2
				HSPE1-MOB4
				MOB4
				RPL15
				NAP1L1
				CSDE1
				PFDN2
				TMEM106B
				GRAMD1B
				RAB6A
				FBXO28
				ENO2
				DDAH1
				HNRNPU
				CNBP
				TNS1
				SAP30BP
				AKIRIN2
				KPNA6
				PLK2
				LAYN
				KDELR1
				UCHL5
				CYLD
				SMG6
				ACVR2A
				UBE2I
				UBE2D3
				RBPJ
				TSC22D2
				ABCC1
				HDAC4
				SCYL3
				ARF1
				GMEB1
				CREB1
				EXOC3
				C16orf72
				CANX
				BDP1
				SETSIP
