# Supplementary material for: Specific alternative splicing and polyadenylation facilitate metastasis mediated by CTC clusters
Source: Research Square preprint supplement (doi:10.21203/rs.3.rs-1128296/v1), 2021-12-07
Supplement: Supplementary file 4 [file e50b6772a444491b1cd7880f.xlsx]

## Sheet: SRP131647_SingleCTCs
Table S3. The modality of APA events in single CTCs and CTC clusters
APA_ID	Gene_Symbol	Modality
NM_000050	ASS1	excluded
NM_000099	CST3	multimodal
NM_000100	CSTB	included
NM_000101	CYBA	excluded
NM_000146	FTL	included
NM_000269	NME1	excluded
NM_000270	PNP	multimodal
NM_000291	PGK1	excluded
NM_000294	PHKG2	multimodal
NM_000310	PPT1	multimodal
NM_000365	TPI1	included
NM_000454	SOD1	excluded
NM_000485	APRT	excluded
NM_000507	FBP1	multimodal
NM_000574	CD55	excluded
NM_000581	GPX1	multimodal
NM_000700	ANXA1	excluded
NM_000701	ATP1A1	excluded
NM_000712	BLVRA	multimodal
NM_000713	BLVRB	excluded
NM_000714	TSPO	included
NM_000754	COMT	excluded
NM_000801	FKBP1A	middle
NM_000852	GSTP1	multimodal
NM_000903	NQO1	excluded
NM_000918	P4HB	included
NM_000943	PPIC	excluded
NM_000968	RPL4	excluded
NM_000971	RPL7	excluded
NM_000975	RPL11	excluded
NM_000977	RPL13	excluded
NM_000978	RPL23	excluded
NM_000981	RPL19	middle
NM_000983	RPL22	excluded
NM_000984	RPL23A	excluded
NM_000990	RPL27A	excluded
NM_000991	RPL28	excluded
NM_000992	RPL29	middle
NM_000993	RPL31	excluded
NM_000994	RPL32	excluded
NM_000996	RPL35A	excluded
NM_000997	RPL37	excluded
NM_000998	RPL37A	excluded
NM_001000	RPL39	included
NM_001001	RPL36AL	excluded
NM_001001392	CD44	excluded
NM_001001503	NDUFV3	excluded
NM_001001701	C4orf3	excluded
NM_001002027	ATP5MC1	included
NM_001002033	JPT1	multimodal
NM_001002248	ANAPC11	included
NM_001002258	ATP5MC3	excluded
NM_001002858	ANXA2	excluded
NM_001004333	RNASEK	included
NM_001005354	PRR13	multimodal
NM_001005474	NFKBIZ	excluded
NM_001005781	SUMO1	excluded
NM_001006941	ALG3	excluded
NM_001007	RPS4X	excluded
NM_001007070	SDCBP	multimodal
NM_001007074	RPL32	excluded
NM_001007214	CACYBP	excluded
NM_001007565	TFG	multimodal
NM_001008709	PPP1CA	included
NM_001009184	GRINA	excluded
NM_001009186	CCT6A	excluded
NM_001009570	CCT7	included
NM_001010	RPS6	excluded
NM_001010858	RNF187	excluded
NM_001010974	BCAS4	multimodal
NM_001010989	HERPUD1	excluded
NM_001011537	FYTTD1	multimodal
NM_001012	RPS8	excluded
NM_001012270	BIRC5	excluded
NM_001012300	MCRS1	multimodal
NM_001012664	SLC3A2	included
NM_001013653	LRRC26	excluded
NM_001014763	ETFB	excluded
NM_001014990	MRPL22	excluded
NM_001017390	SULT1A4	multimodal
NM_001017963	HSP90AA1	excluded
NM_001017998	GNG10	excluded
NM_001018004	TPM1	multimodal
NM_001018067	SERBP1	excluded
NM_001018136	NME1-NME2	included
NM_001018837	HAX1	multimodal
NM_001019	RPS15A	excluded
NM_001022	RPS19	excluded
NM_001023	RPS20	middle
NM_001024212	S100A13	included
NM_001024844	CD82	excluded
NM_001024957	BRMS1	multimodal
NM_001024960	ARPC4	multimodal
NM_001025	RPS23	excluded
NM_001025071	RPS14	excluded
NM_001025205	AP2M1	included
NM_001029	RPS26	excluded
NM_001030018	APRT	included
NM_001030287	ATF3	multimodal
NM_001031	RPS28	excluded
NM_001031677	RAB24	excluded
NM_001031684	SRSF7	excluded
NM_001031711	ERGIC1	multimodal
NM_001032409	OAS1	multimodal
NM_001033056	GLUL	excluded
NM_001033503	SAR1B	excluded
NM_001034	RRM2	excluded
NM_001034025	ERP29	excluded
NM_001035005	C18orf32	excluded
NM_001035513	SDHC	excluded
NM_001037164	ARL4A	excluded
NM_001037494	DYNLL1	multimodal
NM_001037811	HSD17B10	multimodal
NM_001039457	ATP6V0B	included
NM_001039490	CD151	excluded
NM_001039577	CCNL2	multimodal
NM_001039712	DEDD	multimodal
NM_001040431	COA3	multimodal
NM_001040619	ATF3	multimodal
NM_001040649	ACP1	multimodal
NM_001040874	HIST2H2AA4	bimodal
NM_001042432	CLN3	multimodal
NM_001042462	TRAPPC5	excluded
NM_001042465	PSAP	included
NM_001042472	ABHD12	excluded
NM_001042483	NUPR1	excluded
NM_001042679	RHOC	included
NM_001043352	TPM3	excluded
NM_001048249	SMIM15	excluded
NM_001069	TUBB2A	multimodal
NM_001070	TUBG1	multimodal
NM_001077399	PNKD	multimodal
NM_001077628	APH1A	included
NM_001078166	SRSF1	excluded
NM_001079862	DBI	included
NM_001085365	MZT2A	multimodal
NM_001085372	UQCC3	excluded
NM_001086521	NDUFAF8	multimodal
NM_001089591	UQCRHL	excluded
NM_001098208	HNRNPF	excluded
NM_001098398	COPA	excluded
NM_001098616	C1orf43	included
NM_001098673	ATG101	multimodal
NM_001098786	HILPDA	excluded
NM_001099406	SLC39A6	multimodal
NM_001099639	ZNF146	excluded
NM_001099645	RPL22L1	excluded
NM_001099668	HIGD1A	excluded
NM_001099693	RPL31	included
NM_001101	ACTB	middle
NM_001102667	PSMA4	multimodal
NM_001102668	PSMA4	excluded
NM_001105204	RUSC1	multimodal
NM_001105205	RUSC1	multimodal
NM_001110503	TMEM87A	multimodal
NM_001113205	TSTD1	included
NM_001122955	BSCL2	excluded
NM_001123355	PPP6C	excluded
NM_001123377	PARK7	excluded
NM_001126051	HDGF	multimodal
NM_001127192	CNBP	excluded
NM_001127198	TMC6	excluded
NM_001127213	LY6E	multimodal
NM_001127223	CD59	excluded
NM_001127393	ATP5MPL	excluded
NM_001127394	TSEN15	multimodal
NM_001127889	SPG21	multimodal
NM_001128203	PLAAT3	excluded
NM_001128914	PCBP2	multimodal
NM_001130004	ACTN1	excluded
NM_001130674	CALU	excluded
NM_001130678	EIF4E	excluded
NM_001130689	HMGB2	excluded
NM_001130725	PSMB5	included
NM_001130929	STMP1	excluded
NM_001134321	RTL8A	multimodal
NM_001134484	TOMM5	multimodal
NM_001134493	TOMM6	multimodal
NM_001135239	LDHA	excluded
NM_001135255	RBBP4	multimodal
NM_001135592	RPS27A	excluded
NM_001135694	VDAC3	multimodal
NM_001135702	YWHAZ	excluded
NM_001135998	NDUFB11	multimodal
NM_001136008	FXYD3	bimodal
NM_001136010	FXYD3	bimodal
NM_001136016	APP	middle
NM_001136017	CCND3	multimodal
NM_001136134	RPL28	excluded
NM_001136136	RPL28	included
NM_001136137	RPL28	included
NM_001136232	SEC13	included
NM_001136268	DAZAP2	middle
NM_001136275	AKIRIN1	excluded
NM_001136497	BTF3L4	excluded
NM_001136498	CISD3	excluded
NM_001137553	LRRFIP1	excluded
NM_001139457	BCAP31	multimodal
NM_001142298	SQSTM1	included
NM_001142418	MORF4L2	multimodal
NM_001142625	RAB34	multimodal
NM_001142627	SEC61A2	bimodal
NM_001142648	SAR1A	excluded
NM_001142798	C17orf49	multimodal
NM_001142799	C17orf49	multimodal
NM_001143681	GSTK1	multimodal
NM_001143760	EIF5A	middle
NM_001143780	SLC25A39	multimodal
NM_001143841	TMEM106C	multimodal
NM_001143937	PSMA1	included
NM_001143985	BANF1	middle
NM_001144831	PHB2	included
NM_001144932	PSMB5	included
NM_001144943	RAB34	multimodal
NM_001144944	MYL12B	excluded
NM_001145145	SLC1A5	excluded
NM_001145155	NR2F2	excluded
NM_001145156	NR2F2	excluded
NM_001145160	TPM4	included
NM_001145355	CBWD1	excluded
NM_001145410	NONO	multimodal
NM_001145412	NFE2L2	excluded
NM_001145713	SAE1	excluded
NM_001145940	PAFAH1B3	included
NM_001146068	CAPN2	included
NM_001146178	IP6K2	multimodal
NM_001146191	MPZL1	excluded
NM_001146333	SUMF2	included
NM_001151	SLC25A4	excluded
NM_001152	SLC25A5	middle
NM_001154	ANXA5	excluded
NM_001159287	TPI1	included
NM_001162407	CLK1	excluded
NM_001163424	COPS9	included
NM_001164189	PLIN3	excluded
NM_001165415	LDHA	excluded
NM_001165931	RRM2	excluded
NM_001166103	SPINT2	excluded
NM_001166237	GSDMD	multimodal
NM_001168331	NDUFB4	included
NM_001170406	CDK1	bimodal
NM_001170634	FUS	excluded
NM_001170795	ATRAID	included
NM_001171508	MCFD2	excluded
NM_001171511	MCFD2	excluded
NM_001172415	BAG1	excluded
NM_001172695	TSFM	excluded
NM_001172705	EIF4G2	included
NM_001173128	YTHDF2	excluded
NM_001177	ARL1	excluded
NM_001177643	DAG1	excluded
NM_001178087	SERF1B	multimodal
NM_001183	ATP6AP1	bimodal
NM_001184722	GPI	excluded
NM_001184730	PIGT	multimodal
NM_001184740	CTTN	included
NM_001184761	CLTA	included
NM_001184823	VDAC2	excluded
NM_001184891	FLAD1	multimodal
NM_001184979	NDUFS5	included
NM_001185	AZGP1	multimodal
NM_001185012	NDUFA2	multimodal
NM_001185077	ARHGDIA	multimodal
NM_001185092	NIT1	multimodal
NM_001190329	ATP5MC3	excluded
NM_001190452	MTRNR2L1	excluded
NM_001190470	MTRNR2L2	excluded
NM_001190472	MTRNR2L3	multimodal
NM_001190702	MTRNR2L8	excluded
NM_001190706	MTRNR2L9	excluded
NM_001190864	MRPS35	excluded
NM_001190991	CNPY2	included
NM_001190996	ARPC1A	multimodal
NM_001191003	GSTO1	excluded
NM_001193557	ENY2	excluded
NM_001193572	CSRP1	included
NM_001193655	CYBC1	excluded
NM_001195056	DDIT3	multimodal
NM_001195427	SRSF2	included
NM_001195478	TFG	multimodal
NM_001195536	CHMP5	excluded
NM_001197139	DBNDD2	multimodal
NM_001198569	ATP6V0C	excluded
NM_001198719	RBBP7	excluded
NM_001198846	RBM14-RBM4	included
NM_001198868	CAPN1	excluded
NM_001199038	SERINC2	excluded
NM_001199142	EIF3C	excluded
NM_001199355	RPL17-C18orf32	excluded
NM_001199535	TGIF2-RAB5IF	included
NM_001199780	PSMB2	excluded
NM_001199786	FKBP1A	middle
NM_001199851	DAP3	excluded
NM_001199876	SERF2	excluded
NM_001199877	SERF2	excluded
NM_001199954	ACTG1	included
NM_001199957	NDUFB5	excluded
NM_001199975	UQCRB	excluded
NM_001201483	ENO1	included
NM_001202547	SYNJ2BP-COX16	excluded
NM_001204054	NDUFC2	excluded
NM_001204064	CHURC1	excluded
NM_001204082	MICOS10	excluded
NM_001204193	SRP19	excluded
NM_001204196	SRP19	excluded
NM_001204199	SRP19	included
NM_001204861	ELOC	excluded
NM_001206486	ATF3	multimodal
NM_001206799	PKM	included
NM_001206836	RAB11A	excluded
NM_001207000	HNRNPDL	excluded
NM_001212	C1QBP	included
NM_001220777	CDKN1A	multimodal
NM_001236	CBR3	multimodal
NM_001242375	ANAPC13	multimodal
NM_001242598	TMEM147	multimodal
NM_001242831	ELOVL5	multimodal
NM_001242839	GUK1	included
NM_001242840	GUK1	included
NM_001242854	ARFIP2	multimodal
NM_001242891	CSDE1	excluded
NM_001242918	ZFAND6	multimodal
NM_001243131	RPL13	excluded
NM_001243252	EFHD1	multimodal
NM_001243646	CD2BP2	excluded
NM_001243719	RAB6A	multimodal
NM_001243799	TSC22D1	excluded
NM_001243885	TOB1	excluded
NM_001243892	TPD52L2	multimodal
NM_001244572	BID	excluded
NM_001244644	CHMP2B	excluded
NM_001244701	ZFP36L1	excluded
NM_001244812	FOXP1	excluded
NM_001251918	RAP1B	excluded
NM_001252053	PCMT1	multimodal
NM_001252273	DIPK1A	included
NM_001253379	RPL15	excluded
NM_001253764	SRA1	excluded
NM_001253790	SMIM22	excluded
NM_001253816	SLC52A2	multimodal
NM_001254738	RND3	multimodal
NM_001256165	TMCO1	excluded
NM_001256281	RAB34	multimodal
NM_001256302	ETF1	excluded
NM_001256355	UBE2L3	excluded
NM_001256399	ELOVL1	excluded
NM_001256534	SLC25A1	multimodal
NM_001256580	RPL10	excluded
NM_001256721	CCT4	excluded
NM_001256829	TMEM265	excluded
NM_001256879	POLD2	multimodal
NM_001256891	SRI	multimodal
NM_001257096	PAX1	bimodal
NM_001257335	ATP5F1A	excluded
NM_001257401	CD63	excluded
NM_001258028	TKT	excluded
NM_001258289	SELENBP1	multimodal
NM_001258320	TP53I11	multimodal
NM_001258384	IDH3B	included
NM_001258423	SMS	excluded
NM_001260506	RPS3	excluded
NM_001260507	RPS3	excluded
NM_001261400	PSMD9	excluded
NM_001261401	TSN	excluded
NM_001261466	ADAM15	multimodal
NM_001265591	RTN3	middle
NM_001265603	MORF4L1	excluded
NM_001267061	SNX17	multimodal
NM_001267558	PDCD6	middle
NM_001267699	RPS3A	included
NM_001267700	PHB2	included
NM_001267708	ZNF706	excluded
NM_001267809	ILF2	excluded
NM_001267817	OSTC	excluded
NM_001270399	TUBA1A	multimodal
NM_001270439	ARPC5	excluded
NM_001270447	ACADVL	included
NM_001270481	PSMB6	included
NM_001270482	PSMD11	excluded
NM_001270491	RPL13A	excluded
NM_001270550	MDK	excluded
NM_001270552	MDK	excluded
NM_001270837	CRIP2	included
NM_001270896	TRAPPC3	excluded
NM_001270987	LTBR	excluded
NM_001271213	SQOR	multimodal
NM_001271641	MTCH1	included
NM_001271734	COPZ1	multimodal
NM_001271742	CSNK1A1	excluded
NM_001271849	CDK2AP2	multimodal
NM_001271878	KHDRBS1	excluded
NM_001271918	SEC11A	excluded
NM_001271957	SLC39A1	multimodal
NM_001271970	HSP90AB1	included
NM_001271998	RAB4A	excluded
NM_001272007	ISCA2	excluded
NM_001272038	RAB13	multimodal
NM_001272053	MRFAP1	included
NM_001272083	SHISA5	multimodal
NM_001277199	CNIH4	excluded
NM_001277224	TAGLN2	included
NM_001277764	CIB1	excluded
NM_001278191	TPM3	excluded
NM_001278197	CDK5RAP3	multimodal
NM_001278243	ZFAND5	excluded
NM_001278244	ZFAND5	excluded
NM_001278263	CARHSP1	excluded
NM_001278265	CARHSP1	excluded
NM_001278346	PHYKPL	multimodal
NM_001278379	ARL6IP4	multimodal
NM_001278555	UBE2E3	multimodal
NM_001278556	ARPC3	excluded
NM_001278645	NDUFB9	included
NM_001278656	SNRPD3	excluded
NM_001278700	POLR2H	multimodal
NM_001278712	ATG3	bimodal
NM_001278946	SEC13	included
NM_001279360	LYPLA1	excluded
NM_001280	CIRBP	included
NM_001280557	SLC39A4	multimodal
NM_001280789	SURF4	multimodal
NM_001280790	SURF4	multimodal
NM_001281297	EDF1	included
NM_001281427	DCTN3	multimodal
NM_001281434	ZNHIT3	multimodal
NM_001281437	ADRM1	multimodal
NM_001281447	GTF2IRD2	excluded
NM_001281474	MLPH	excluded
NM_001281496	PHB	excluded
NM_001281497	PHB	excluded
NM_001281512	HADHB	multimodal
NM_001281529	PSME1	included
NM_001281532	PSENEN	excluded
NM_001281716	UBB	included
NM_001281719	UBB	included
NM_001282150	VPS29	excluded
NM_001282161	UBE2A	excluded
NM_001282162	CAPZB	excluded
NM_001282205	SIGMAR1	excluded
NM_001282234	PSMA6	included
NM_001282385	CSNK2B	multimodal
NM_001282404	MDH2	excluded
NM_001282576	UBE2V1	excluded
NM_001282580	UBE2V1	multimodal
NM_001282604	PTGES3	included
NM_001282606	TMBIM4	excluded
NM_001282621	PGRMC1	bimodal
NM_001282625	LMNA	included
NM_001282652	STIP1	excluded
NM_001282674	BEX3	excluded
NM_001283037	RTF2	excluded
NM_001284239	SARAF	excluded
NM_001284367	NDUFB8	included
NM_001284368	NDUFB8	multimodal
NM_001284502	NUBP2	multimodal
NM_001285450	PDXDC1	multimodal
NM_001286056	CNN3	excluded
NM_001286084	TRMT112	included
NM_001286086	C11orf98	multimodal
NM_001286110	CLN3	excluded
NM_001286272	TPT1	excluded
NM_001286416	SUMO3	excluded
NM_001286435	NME4	multimodal
NM_001286436	NME4	multimodal
NM_001286487	TMEM87A	excluded
NM_001286706	UFM1	excluded
NM_001286773	OCIAD2	excluded
NM_001286789	CBR1	multimodal
NM_001286836	CBWD5	middle
NM_001287032	STOML2	excluded
NM_001287392	COMMD6	excluded
NM_001287434	CCND3	multimodal
NM_001287588	SLC50A1	multimodal
NM_001287592	SLC50A1	multimodal
NM_001287744	FDFT1	excluded
NM_001287747	FDFT1	excluded
NM_001288	CLIC1	middle
NM_001288565	TMEM9	excluded
NM_001288610	JPT1	multimodal
NM_001288659	METTL9	multimodal
NM_001288660	METTL9	multimodal
NM_001288756	BABAM1	excluded
NM_001288978	XRCC6	included
NM_001289414	ANAPC11	excluded
NM_001289797	PCBD1	included
NM_001289910	IDH2	multimodal
NM_001290135	EI24	excluded
NM_001290193	MYADM	excluded
NM_001290309	CTNNA1	multimodal
NM_001290553	ADIPOR1	excluded
NM_001290557	ADIPOR1	excluded
NM_001291304	NDUFA5	excluded
NM_001291428	BAX	excluded
NM_001291430	BAX	multimodal
NM_001291431	BAX	excluded
NM_001291739	CD24	excluded
NM_001291916	SNRPD1	excluded
NM_001293179	PRSS23	excluded
NM_001293180	PRSS23	excluded
NM_001293213	TUBB	excluded
NM_001293214	TUBB	excluded
NM_001294332	SDHA	excluded
NM_001294333	ATP6V0B	included
NM_001297418	HNRNPM	multimodal
NM_001297566	UQCRH	included
NM_001297723	C1orf43	included
NM_001297738	TBCA	included
NM_001300	KLF6	excluded
NM_001300795	UBE2D3	excluded
NM_001300796	RAN	excluded
NM_001300829	CIRBP	excluded
NM_001300888	PBDC1	excluded
NM_001300900	MRPS34	middle
NM_001300901	TCEAL4	excluded
NM_001300902	CD55	multimodal
NM_001300914	DNAJB1	included
NM_001301020	OAZ1	excluded
NM_001301068	ARL1	excluded
NM_001301076	AP2S1	included
NM_001301241	ARHGDIA	multimodal
NM_001301242	ARHGDIA	included
NM_001301834	C12orf57	included
NM_001301836	C12orf57	included
NM_001302545	AAMP	excluded
NM_001303007	DDAH2	multimodal
NM_001303048	MYL12A	multimodal
NM_001303060	TMED4	included
NM_001303062	TMED4	excluded
NM_001303114	TUBA1C	included
NM_001303117	TUBA1C	excluded
NM_001303235	ISG20	excluded
NM_001303247	WDR61	excluded
NM_001303499	CNN2	multimodal
NM_001303507	PPP4C	excluded
NM_001304451	PGD	excluded
NM_001305	CLDN4	multimodal
NM_001305043	TMEM59	excluded
NM_001305066	TMEM59	included
NM_001305626	CALM2	middle
NM_001305841	TCEAL4	excluded
NM_001306	CLDN3	excluded
NM_001306153	CCT5	excluded
NM_001306154	CCT5	excluded
NM_001307	CLDN7	excluded
NM_001308036	NCBP2	excluded
NM_001308043	CFLAR	multimodal
NM_001308205	SSR3	excluded
NM_001308396	MRPL43	multimodal
NM_001308824	SF3B1	multimodal
NM_001309861	GNAS	excluded
NM_001309883	GNAS	included
NM_001310315	TUBB2A	multimodal
NM_001310326	UBE2T	excluded
NM_001311	CRIP1	excluded
NM_001311203	CLTA	included
NM_001311311	VKORC1	included
NM_001312653	HIST1H2BK	bimodal
NM_001313858	ARL6IP1	middle
NM_001313893	HMGB1	excluded
NM_001313932	CAPZB	included
NM_001313941	RHOA	middle
NM_001313993	IGFBP2	excluded
NM_001314039	DNAJA1	excluded
NM_001316374	MDH1	multimodal
NM_001317007	S100A16	included
NM_001317008	S100A16	included
NM_001317111	MOB1A	excluded
NM_001317167	SNRPG	excluded
NM_001317231	MTCH2	excluded
NM_001317783	TSTA3	multimodal
NM_001317856	EIF3CL	excluded
NM_001317897	SMIM14	excluded
NM_001317956	IDI1	excluded
NM_001317968	ARRDC1	multimodal
NM_001317981	RPL26L1	excluded
NM_001318015	ZDHHC12	multimodal
NM_001318016	ZDHHC12	multimodal
NM_001318020	ZDHHC12	multimodal
NM_001318051	NDUFS4	excluded
NM_001318058	DMAC1	excluded
NM_001318188	HNRNPK	excluded
NM_001318236	LAMTOR4	included
NM_001318237	LAMTOR4	included
NM_001318252	C7orf50	multimodal
NM_001318485	MRPL20	multimodal
NM_001318494	TRAPPC4	excluded
NM_001318526	TRAPPC2L	excluded
NM_001318527	TRAPPC2L	excluded
NM_001318770	MRPL14	excluded
NM_001318788	COX4I1	included
NM_001318794	COX4I1	included
NM_001318797	COX4I1	excluded
NM_001318825	HEXA	excluded
NM_001318848	CNPY3	multimodal
NM_001318863	DGUOK	multimodal
NM_001318942	MEA1	included
NM_001319036	COX7A2L	multimodal
NM_001319040	COX7A2L	multimodal
NM_001319068	ITGB1BP1	excluded
NM_001319081	HMGA1	excluded
NM_001319086	RUVBL1	included
NM_001319137	CTSH	excluded
NM_001319140	AK2	excluded
NM_001319157	DYNLRB1	included
NM_001319184	RNPEP	multimodal
NM_001319188	HDGF	multimodal
NM_001319236	RPL34	excluded
NM_001319991	SUPT5H	multimodal
NM_001320194	NACA	included
NM_001320327	CHCHD2	included
NM_001320397	PCNP	excluded
NM_001320523	SYNGR2	included
NM_001320597	DDX5	excluded
NM_001320628	BOLA2-SMG1P6	multimodal
NM_001320651	U2AF1L5	multimodal
NM_001320778	SCAMP2	excluded
NM_001320904	DTYMK	bimodal
NM_001320913	FXYD5	excluded
NM_001320929	GTF2A2	excluded
NM_001320979	AKR7A2	excluded
NM_001321017	UBA52	excluded
NM_001321021	UBA52	excluded
NM_001321170	TECR	middle
NM_001321185	TMC6	multimodal
NM_001321335	SELENOH	excluded
NM_001321367	CD99	included
NM_001321369	CD99	excluded
NM_001321421	ARHGDIB	multimodal
NM_001321423	ARHGDIB	multimodal
NM_001321441	AHSA1	multimodal
NM_001321648	NUDT5	excluded
NM_001321688	BZW1	excluded
NM_001321690	BZW1	multimodal
NM_001321704	RPS9	middle
NM_001321845	COMMD4	multimodal
NM_001321970	MRPS11	excluded
NM_001321973	MRPS11	bimodal
NM_001321974	MRPS11	bimodal
NM_001322033	ACTN4	middle
NM_001322086	AHCY	multimodal
NM_001322959	TMEM183A	excluded
NM_001322970	OAT	multimodal
NM_001323011	PMVK	multimodal
NM_001323027	IQCG	included
NM_001323030	IQCG	included
NM_001323069	PFKP	multimodal
NM_001323073	PFKP	multimodal
NM_001323423	RBM39	excluded
NM_001323960	RBCK1	multimodal
NM_001323985	CTNNA1	multimodal
NM_001324303	RPN2	multimodal
NM_001324306	RPN2	multimodal
NM_001329402	VMP1	multimodal
NM_001329417	TMA7	excluded
NM_001329502	GPX1	bimodal
NM_001329503	GPX1	multimodal
NM_001329559	TIMM50	excluded
NM_001329570	NIPSNAP3A	excluded
NM_001329609	ARL16	multimodal
NM_001329678	PAXX	multimodal
NM_001329722	TMEM54	multimodal
NM_001329752	FAM136A	excluded
NM_001329921	CALM3	excluded
NM_001330176	COPRS	multimodal
NM_001330200	RPL19	middle
NM_001330206	MIEN1	excluded
NM_001330269	ATP5MC2	included
NM_001330284	MZT2B	multimodal
NM_001330286	DUT	excluded
NM_001330312	CD9	middle
NM_001330337	CBWD2	excluded
NM_001330393	VEZF1	excluded
NM_001330421	CYB561	excluded
NM_001330426	NAGK	excluded
NM_001330469	COPE	excluded
NM_001330536	CENPX	included
NM_001330692	PSMD4	included
NM_001330985	TMEM230	multimodal
NM_001344	DAD1	included
NM_001346500	CD164	excluded
NM_001346663	TK1	multimodal
NM_001346879	POLR2H	multimodal
NM_001347892	TMX2	included
NM_001348065	DCTN2	excluded
NM_001348129	NBDY	excluded
NM_001348133	CCNI	excluded
NM_001348957	SMIM26	included
NM_001348958	SMIM26	excluded
NM_001350968	C7orf50	multimodal
NM_001351263	TSPAN15	excluded
NM_001352773	JUP	multimodal
NM_001352777	JUP	multimodal
NM_001353053	GSN	excluded
NM_001353264	FAM49B	excluded
NM_001353337	ANKRD36B	excluded
NM_001353402	NDUFAF8	multimodal
NM_001354457	PLPP5	multimodal
NM_001354845	CCNB1	excluded
NM_001354928	VCP	excluded
NM_001355006	NPM1	bimodal
NM_001355009	NPM1	included
NM_001355019	PPP2CA	excluded
NM_001355401	NPIPB12	multimodal
NM_001357	DHX9	excluded
NM_001357943	GAPDH	included
NM_001359651	PEF1	multimodal
NM_001362531	CKB	multimodal
NM_001362750	AHCY	excluded
NM_001362896	PUF60	included
NM_001363000	THEM6	bimodal
NM_001363602	NDUFS7	included
NM_001363669	CALM1	excluded
NM_001363673	ELOF1	multimodal
NM_001363688	NPC2	included
NM_001363695	PPT1	multimodal
NM_001363697	RPL28	multimodal
NM_001363735	TMED3	included
NM_001363778	SYNGR2	included
NM_001363785	EIF3L	excluded
NM_001363810	VMA21	excluded
NM_001363848	TK1	multimodal
NM_001363860	RPS16	excluded
NM_001363872	PLSCR1	excluded
NM_001363881	HMCES	multimodal
NM_001363887	LRCH3	included
NM_001363963	DERL1	excluded
NM_001363994	CANX	multimodal
NM_001364007	NOTCH2NLB	excluded
NM_001364008	NOTCH2NLB	excluded
NM_001364013	NOTCH2NLC	excluded
NM_001364126	CLTB	excluded
NM_001364127	CLTB	multimodal
NM_001364239	HNRNPH1	middle
NM_001364683	TPM3	included
NM_001365304	LOC112694756	included
NM_001365717	LRCH3	included
NM_001365719	LRCH3	included
NM_001365754	MIF4GD	multimodal
NM_001365761	MICOS13	included
NM_001365774	ALDH9A1	excluded
NM_001365776	TPM1	multimodal
NM_001365777	TPM1	multimodal
NM_001365782	TPM1	multimodal
NM_001366292	COX7A2	excluded
NM_001366293	COX7A2	included
NM_001366481	RPL7L1	excluded
NM_001366643	SAP18	excluded
NM_001366994	IFI27	excluded
NM_001367837	TPM4	included
NM_001369744	ITGB1BP1	excluded
NM_001369751	SNRPD2	included
NM_001369752	SNRPD2	included
NM_001369859	PTP4A2	excluded
NM_001370177	NA	excluded
NM_001370340	NA	excluded
NM_001370345	NA	excluded
NM_001371394	NA	excluded
NM_001371720	NA	multimodal
NM_001371734	NA	excluded
NM_001374178	NA	middle
NM_001374326	NA	excluded
NM_001374407	NA	multimodal
NM_001374512	NA	multimodal
NM_001374593	NA	excluded
NM_001375354	NA	multimodal
NM_001375991	NA	included
NM_001376560	NA	multimodal
NM_001376902	NA	multimodal
NM_001377298	NA	excluded
NM_001377300	NA	included
NM_001377527	NA	excluded
NM_001378351	NA	multimodal
NM_001378451	NA	excluded
NM_001378495	NA	excluded
NM_001379043	NA	excluded
NM_001379366	NA	multimodal
NM_001381852	NA	included
NM_001381911	NA	excluded
NM_001381943	NA	multimodal
NM_001382003	NA	bimodal
NM_001382225	NA	bimodal
NM_001382293	NA	included
NM_001382294	NA	middle
NM_001382365	NA	middle
NM_001382366	NA	middle
NM_001382542	NA	multimodal
NM_001382727	NA	multimodal
NM_001382730	NA	multimodal
NM_001384280	NA	bimodal
NM_001384714	NA	excluded
NM_001384982	NA	multimodal
NM_001385254	NA	excluded
NM_001385265	NA	excluded
NM_001385266	NA	excluded
NM_001386740	NA	excluded
NM_001386875	NA	excluded
NM_001387651	NA	multimodal
NM_001387846	NA	excluded
NM_001388314	NA	multimodal
NM_001388318	NA	excluded
NM_001393653	NA	excluded
NM_001393915	NA	excluded
NM_001393919	NA	excluded
NM_001394000	NA	excluded
NM_001394149	NA	excluded
NM_001394674	NA	excluded
NM_001394769	NA	multimodal
NM_001398	ECH1	included
NM_001402	EEF1A1	excluded
NM_001404	EEF1G	included
NM_001418	EIF4G2	included
NM_001424	EMP2	excluded
NM_001487	BLOC1S1	excluded
NM_001537	HSBP1	excluded
NM_001540	HSPB1	middle
NM_001554	CCN1	excluded
NM_001618	PARP1	excluded
NM_001636	SLC25A6	included
NM_001647	APOD	excluded
NM_001658	ARF1	included
NM_001660	ARF4	included
NM_001662	ARF5	included
NM_001675	ATF4	included
NM_001677	ATP1B1	excluded
NM_001679	ATP1B3	excluded
NM_001686	ATP5F1B	included
NM_001687	ATP5F1D	included
NM_001688	ATP5PB	excluded
NM_001731	BTG1	excluded
NM_001743	CALM2	middle
NM_001757	CBR1	excluded
NM_001777	CD47	excluded
NM_001791	CDC42	excluded
NM_001826	CKS1B	included
NM_001827	CKS2	multimodal
NM_001862	COX5B	excluded
NM_001866	COX7B	excluded
NM_001867	COX7C	excluded
NM_001878	CRABP2	bimodal
NM_001909	CTSD	middle
NM_001914	CYB5A	excluded
NM_001916	CYC1	included
NM_001961	EEF2	middle
NM_001967	EIF4A2	middle
NM_001985	ETFB	excluded
NM_002014	FKBP4	excluded
NM_002085	GPX4	included
NM_002086	GRB2	multimodal
NM_002087	GRN	multimodal
NM_002094	GSPT1	excluded
NM_002097	GTF3A	multimodal
NM_002106	H2AFZ	included
NM_002116	HLA-A	multimodal
NM_002117	HLA-C	excluded
NM_002136	HNRNPA1	excluded
NM_002139	RBMX	multimodal
NM_002156	HSPD1	multimodal
NM_002157	HSPE1	excluded
NM_002165	ID1	bimodal
NM_002166	ID2	excluded
NM_002167	ID3	bimodal
NM_002168	IDH2	excluded
NM_002228	JUN	excluded
NM_002266	KPNA2	excluded
NM_002273	KRT8	included
NM_002276	KRT19	included
NM_002295	RPSA	excluded
NM_002306	LGALS3	excluded
NM_002337	LRPAP1	excluded
NM_002354	EPCAM	excluded
NM_002437	MPV17	multimodal
NM_002455	MTX1	multimodal
NM_002488	NDUFA2	excluded
NM_002489	NDUFA4	excluded
NM_002490	NDUFA6	excluded
NM_002491	NDUFB3	included
NM_002493	NDUFB6	excluded
NM_002534	OAS1	bimodal
NM_002537	OAZ2	multimodal
NM_002567	PEBP1	excluded
NM_002568	PABPC1	excluded
NM_002573	PAFAH1B3	included
NM_002629	PGAM1	multimodal
NM_002635	SLC25A3	excluded
NM_002695	POLR2E	excluded
NM_002696	POLR2G	multimodal
NM_002710	PPP1CC	multimodal
NM_002773	PRSS8	multimodal
NM_002787	PSMA2	excluded
NM_002790	PSMA5	excluded
NM_002791	PSMA6	included
NM_002792	PSMA7	multimodal
NM_002793	PSMB1	included
NM_002798	PSMB6	included
NM_002806	PSMC6	excluded
NM_002808	PSMD2	included
NM_002810	PSMD4	middle
NM_002811	PSMD7	excluded
NM_002812	PSMD8	multimodal
NM_002815	PSMD11	excluded
NM_002823	PTMA	middle
NM_002904	NELFE	excluded
NM_002939	RNH1	multimodal
NM_002947	RPA3	excluded
NM_002948	RPL15	excluded
NM_002949	MRPL12	multimodal
NM_002950	RPN1	excluded
NM_002952	RPS2	included
NM_002965	S100A9	multimodal
NM_002966	S100A10	middle
NM_002970	SAT1	included
NM_002997	SDC1	excluded
NM_002999	SDC4	multimodal
NM_003000	SDHB	excluded
NM_003001	SDHC	middle
NM_003009	SELENOW	included
NM_003016	SRSF2	included
NM_003017	SRSF3	excluded
NM_003022	SH3BGRL	multimodal
NM_003079	SMARCE1	excluded
NM_003090	SNRPA1	excluded
NM_003091	SNRPB	included
NM_003093	SNRPC	excluded
NM_003094	SNRPE	excluded
NM_003107	SOX4	excluded
NM_003129	SQLE	excluded
NM_003130	SRI	excluded
NM_003133	SRP9	included
NM_003134	SRP14	excluded
NM_003145	SSR2	included
NM_003168	SUPT4H1	excluded
NM_003172	SURF1	excluded
NM_003187	TAF9	included
NM_003217	TMBIM6	included
NM_003258	TK1	multimodal
NM_003276	TMPO	bimodal
NM_003295	TPT1	excluded
NM_003299	HSP90B1	multimodal
NM_003311	PHLDA2	excluded
NM_003321	TUFM	excluded
NM_003329	TXN	excluded
NM_003337	UBE2B	excluded
NM_003348	UBE2N	excluded
NM_003352	SUMO1	excluded
NM_003366	UQCRC2	excluded
NM_003374	VDAC1	included
NM_003379	EZR	multimodal
NM_003407	ZFP36	multimodal
NM_003457	ZNF207	excluded
NM_003491	NAA10	excluded
NM_003495	HIST1H4I	bimodal
NM_003516	HIST2H2AA3	bimodal
NM_003610	RAE1	excluded
NM_003641	IFITM1	excluded
NM_003676	DEGS1	excluded
NM_003689	AKR7A2	multimodal
NM_003731	SSNA1	bimodal
NM_003754	EIF3F	excluded
NM_003756	EIF3H	excluded
NM_003757	EIF3I	included
NM_003761	VAMP8	multimodal
NM_003776	MRPL40	multimodal
NM_003779	B4GALT3	multimodal
NM_003792	EDF1	included
NM_003795	SNX3	excluded
NM_003801	GPAA1	multimodal
NM_003827	NAPA	excluded
NM_003860	BANF1	middle
NM_003863	DPM2	multimodal
NM_003897	IER3	multimodal
NM_003915	CPNE1	multimodal
NM_003932	ST13	excluded
NM_003945	ATP6V0E1	excluded
NM_003973	RPL14	excluded
NM_003979	GPRC5A	excluded
NM_004034	ANXA7	excluded
NM_004048	B2M	middle
NM_004074	COX8A	included
NM_004077	CS	multimodal
NM_004083	DDIT3	multimodal
NM_004092	ECHS1	multimodal
NM_004095	EIF4EBP1	included
NM_004125	DNAJC25-GNG10	excluded
NM_004148	NINJ1	included
NM_004161	RAB1A	excluded
NM_004223	UBE2L6	bimodal
NM_004231	ATP6V1F	included
NM_004252	SLC9A3R1	bimodal
NM_004255	COX5A	excluded
NM_004261	SELENOF	excluded
NM_004280	EEF1E1	excluded
NM_004295	TRAF4	excluded
NM_004322	BAD	multimodal
NM_004331	BNIP3L	excluded
NM_004335	BST2	excluded
NM_004339	PTTG1IP	multimodal
NM_004343	CALR	multimodal
NM_004373	COX6A1	included
NM_004374	COX6C	excluded
NM_004393	DAG1	excluded
NM_004394	DAP	multimodal
NM_004417	DUSP1	multimodal
NM_004433	ELF3	excluded
NM_004450	ERH	bimodal
NM_004493	HSD17B10	multimodal
NM_004499	HNRNPAB	multimodal
NM_004501	HNRNPU	excluded
NM_004508	IDI1	excluded
NM_004528	MGST3	excluded
NM_004537	NAP1L1	excluded
NM_004542	NDUFA3	excluded
NM_004544	NDUFA10	excluded
NM_004547	NDUFB4	excluded
NM_004549	NDUFC2	excluded
NM_004551	NDUFS3	multimodal
NM_004593	TRA2B	excluded
NM_004607	TBCA	excluded
NM_004637	RAB7A	multimodal
NM_004663	RAB11A	excluded
NM_004691	ATP6V0D1	excluded
NM_004699	FAM50A	excluded
NM_004708	PDCD5	excluded
NM_004710	SYNGR2	included
NM_004712	HGS	multimodal
NM_004713	NEMF	multimodal
NM_004718	COX7A2L	excluded
NM_004800	TM9SF2	excluded
NM_004862	LITAF	excluded
NM_004888	ATP6V1G1	excluded
NM_004905	PRDX6	excluded
NM_004925	AQP3	multimodal
NM_004926	ZFP36L1	excluded
NM_004960	FUS	multimodal
NM_004965	HMGN1	included
NM_005001	NDUFA7	excluded
NM_005002	NDUFA9	excluded
NM_005008	SNU13	excluded
NM_005015	OXA1L	excluded
NM_005022	PFN1	middle
NM_005034	POLR2K	excluded
NM_005101	ISG15	multimodal
NM_005105	RBM8A	excluded
NM_005168	RND3	multimodal
NM_005216	DDOST	excluded
NM_005252	FOS	excluded
NM_005313	PDIA3	excluded
NM_005319	HIST1H1C	multimodal
NM_005324	H3F3B	excluded
NM_005327	HADH	multimodal
NM_005340	HINT1	excluded
NM_005347	HSPA5	excluded
NM_005381	NCL	excluded
NM_005439	MLF2	included
NM_005494	DNAJB6	multimodal
NM_005506	SCARB2	excluded
NM_005507	CFL1	middle
NM_005514	HLA-B	multimodal
NM_005516	HLA-E	excluded
NM_005517	HMGN2	excluded
NM_005524	HES1	multimodal
NM_005556	KRT7	included
NM_005567	LGALS3BP	included
NM_005600	NIT1	multimodal
NM_005614	RHEB	excluded
NM_005620	S100A11	middle
NM_005669	REEP5	excluded
NM_005698	SCAMP3	middle
NM_005720	ARPC1B	multimodal
NM_005721	ACTR3	excluded
NM_005722	ACTR2	excluded
NM_005724	TSPAN3	excluded
NM_005729	PPIF	excluded
NM_005762	TRIM28	excluded
NM_005765	ATP6AP2	multimodal
NM_005776	CNIH1	excluded
NM_005782	ALYREF	multimodal
NM_005787	ALG3	excluded
NM_005789	PSME3	excluded
NM_005796	NUTF2	excluded
NM_005801	EIF1	excluded
NM_005803	FLOT1	excluded
NM_005805	PSMD14	excluded
NM_005809	PRDX2	middle
NM_005817	PLIN3	excluded
NM_005827	SLC35B1	excluded
NM_005837	POP7	multimodal
NM_005849	IGSF6	included
NM_005856	RAMP3	included
NM_005870	SAP18	excluded
NM_005911	MAT2A	multimodal
NM_005953	MT2A	multimodal
NM_005971	FXYD3	excluded
NM_005980	S100P	bimodal
NM_005998	CCT3	included
NM_006003	UQCRFS1	excluded
NM_006012	CLPP	excluded
NM_006013	RPL10	excluded
NM_006014	LAGE3	multimodal
NM_006022	TSC22D1	excluded
NM_006082	TUBA1B	included
NM_006088	TUBB4B	included
NM_006156	NEDD8	included
NM_006164	NFE2L2	excluded
NM_006184	NUCB1	multimodal
NM_006191	PA2G4	excluded
NM_006192	PAX1	bimodal
NM_006223	PIN4	excluded
NM_006234	POLR2J	excluded
NM_006265	RAD21	excluded
NM_006275	SRSF6	multimodal
NM_006304	SEM1	excluded
NM_006327	TIMM23	multimodal
NM_006335	TIMM17A	excluded
NM_006337	MCRS1	multimodal
NM_006339	HMG20B	multimodal
NM_006349	ZNHIT1	multimodal
NM_006356	ATP5PD	included
NM_006368	CREB3	multimodal
NM_006396	ZNRD2	excluded
NM_006401	ANP32B	excluded
NM_006407	ARL6IP5	excluded
NM_006408	AGR2	excluded
NM_006412	AGPAT2	multimodal
NM_006423	RABAC1	included
NM_006428	MRPL28	excluded
NM_006430	CCT4	excluded
NM_006431	CCT2	multimodal
NM_006432	NPC2	multimodal
NM_006435	IFITM2	included
NM_006443	DNPH1	multimodal
NM_006471	MYL12A	multimodal
NM_006476	ATP5MG	excluded
NM_006496	GNAI3	excluded
NM_006519	DYNLT1	included
NM_006579	EBP	included
NM_006597	HSPA8	included
NM_006600	NUDC	excluded
NM_006622	PLK2	multimodal
NM_006636	MTHFD2	excluded
NM_006645	STARD10	multimodal
NM_006694	JTB	excluded
NM_006708	GLO1	multimodal
NM_006713	SUB1	excluded
NM_006743	RBM3	excluded
NM_006761	YWHAE	excluded
NM_006793	PRDX3	multimodal
NM_006795	EHD1	excluded
NM_006801	KDELR1	excluded
NM_006808	SEC61B	included
NM_006811	SERINC3	excluded
NM_006815	TMED2	excluded
NM_006816	LMAN2	multimodal
NM_006826	YWHAQ	included
NM_006827	TMED10	excluded
NM_006829	ADIRF	excluded
NM_006830	UQCR11	excluded
NM_006833	COPS6	excluded
NM_006854	KDELR2	excluded
NM_006870	DSTN	excluded
NM_006886	ATP5F1E	excluded
NM_006899	IDH3B	included
NM_006907	PYCR1	multimodal
NM_006908	RAC1	excluded
NM_006923	SDF2	excluded
NM_006924	SRSF1	excluded
NM_006925	SRSF5	excluded
NM_006930	SKP1	excluded
NM_006937	SUMO2	excluded
NM_007006	NUDT21	excluded
NM_007033	RER1	excluded
NM_007065	CDC37	multimodal
NM_007099	ACP1	multimodal
NM_007104	RPL10A	middle
NM_007108	ELOB	excluded
NM_007178	STRAP	multimodal
NM_007208	MRPL3	excluded
NM_007236	CHP1	multimodal
NM_007278	GABARAP	excluded
NM_007285	GABARAPL2	multimodal
NM_007364	TMED3	included
NM_007367	RALY	excluded
NM_012203	GRHPR	multimodal
NM_012319	SLC39A6	excluded
NM_012321	LSM4	excluded
NM_012322	LSM5	excluded
NM_012325	MAPRE1	excluded
NM_012391	SPDEF	multimodal
NM_012394	PFDN2	multimodal
NM_012412	H2AFV	excluded
NM_012433	SF3B1	excluded
NM_012456	TIMM10	excluded
NM_012458	TIMM13	excluded
NM_012459	TIMM8B	multimodal
NM_012473	TXN2	excluded
NM_013238	DNAJC15	excluded
NM_013258	PYCARD	excluded
NM_013336	SEC61A1	multimodal
NM_013349	NENF	excluded
NM_013379	DPP7	multimodal
NM_013387	UQCR10	excluded
NM_013442	STOML2	excluded
NM_013995	LAMP2	multimodal
NM_014041	SPCS1	excluded
NM_014046	MRPS18B	multimodal
NM_014047	C19orf53	excluded
NM_014050	MRPL42	excluded
NM_014060	MCTS1	excluded
NM_014077	FAM32A	multimodal
NM_014078	MRPL13	excluded
NM_014106	ZNF770	excluded
NM_014172	PHPT1	included
NM_014175	MRPL15	excluded
NM_014182	ORMDL2	excluded
NM_014187	TMEM208	bimodal
NM_014188	SSU72	multimodal
NM_014206	TMEM258	excluded
NM_014220	TM4SF1	included
NM_014222	NDUFA8	multimodal
NM_014225	PPP2R1A	excluded
NM_014248	RBX1	excluded
NM_014255	CNPY2	excluded
NM_014267	C11orf58	excluded
NM_014313	TMEM50A	excluded
NM_014330	PPP1R15A	included
NM_014335	EID1	excluded
NM_014341	MTCH1	included
NM_014367	FAM162A	excluded
NM_014380	BEX3	included
NM_014394	GHITM	excluded
NM_014399	TSPAN13	excluded
NM_014402	UQCRQ	excluded
NM_014445	SERP1	excluded
NM_014455	RNF115	excluded
NM_014463	LSM3	excluded
NM_014501	UBE2S	excluded
NM_014604	TAX1BP3	included
NM_014623	MEA1	included
NM_014624	S100A6	included
NM_014713	LAPTM4A	middle
NM_014736	PCLAF	excluded
NM_014740	EIF4A3	excluded
NM_014752	SPCS2	excluded
NM_014765	TOMM20	excluded
NM_015051	ERP44	excluded
NM_015161	ARL6IP1	middle
NM_015388	YIPF3	multimodal
NM_015391	ANAPC13	multimodal
NM_015392	NPDC1	multimodal
NM_015415	MPC2	excluded
NM_015497	TMEM87A	excluded
NM_015564	LRRTM2	included
NM_015584	POLDIP2	multimodal
NM_015702	MMADHC	excluded
NM_015853	UBXN1	multimodal
NM_015871	ZNF593	multimodal
NM_015920	RPS27L	excluded
NM_015921	CUTA	excluded
NM_015932	POMP	excluded
NM_015933	TMA7	excluded
NM_015949	GET4	excluded
NM_015966	ERGIC3	excluded
NM_015971	MRPS7	multimodal
NM_016002	SCCPDH	excluded
NM_016022	APH1A	included
NM_016038	SBDS	multimodal
NM_016039	RTRAF	excluded
NM_016047	SF3B6	multimodal
NM_016061	YPEL5	excluded
NM_016062	CIAO2B	excluded
NM_016065	MRPS16	excluded
NM_016068	FIS1	excluded
NM_016070	MRPS23	excluded
NM_016079	CHMP3	excluded
NM_016085	ATRAID	included
NM_016100	NAA20	multimodal
NM_016127	SARAF	excluded
NM_016131	RAB10	excluded
NM_016145	WDR83OS	included
NM_016199	LSM7	multimodal
NM_016200	LSM8	excluded
NM_016208	VPS28	included
NM_016219	MAN1B1	multimodal
NM_016237	ANAPC5	excluded
NM_016275	SELENOT	excluded
NM_016283	AK6	excluded
NM_016286	DCXR	excluded
NM_016311	ATP5IF1	included
NM_016400	HYPK	excluded
NM_016404	TRMT112	included
NM_016406	UFC1	included
NM_016462	TMEM14C	multimodal
NM_016470	OSER1	excluded
NM_016480	PAIP2	multimodal
NM_016491	MRPL37	excluded
NM_016494	RNF181	excluded
NM_016497	MRPL51	excluded
NM_016504	MRPL27	multimodal
NM_016520	C9orf78	excluded
NM_016565	COA4	multimodal
NM_016592	GNAS	excluded
NM_016639	TNFRSF12A	multimodal
NM_016641	GDE1	excluded
NM_016816	OAS1	multimodal
NM_017491	WDR1	multimodal
NM_017510	TMED9	excluded
NM_017528	BUD23	excluded
NM_017670	OTUB1	excluded
NM_017819	TRMT10C	excluded
NM_017823	DUSP23	multimodal
NM_017841	SDHAF2	excluded
NM_017861	PIGX	excluded
NM_017866	TMEM70	excluded
NM_017896	GID8	excluded
NM_017907	LAMTOR1	multimodal
NM_017914	C19orf24	multimodal
NM_017924	C14orf119	excluded
NM_017971	MRPL20	included
NM_018049	PLEKHJ1	included
NM_018407	LAPTM4B	excluded
NM_018445	SELENOS	excluded
NM_018453	EAPP	excluded
NM_018462	BRK1	excluded
NM_018491	CBWD1	excluded
NM_018648	NOP10	included
NM_018670	MESP1	multimodal
NM_018683	RNF114	excluded
NM_018838	NDUFA12	included
NM_018946	NANS	excluded
NM_018947	CYCS	excluded
NM_018997	MRPS21	excluded
NM_019026	TMCO1	excluded
NM_019037	EXOSC4	multimodal
NM_019059	TOMM7	included
NM_019107	MYDGF	excluded
NM_019613	WDR45B	excluded
NM_020154	EMC7	multimodal
NM_020202	NIT2	excluded
NM_020307	CCNL1	excluded
NM_020387	RAB25	multimodal
NM_020529	NFKBIA	included
NM_020531	APMAP	multimodal
NM_020532	RTN4	excluded
NM_020672	S100A14	included
NM_020791	TAOK1	excluded
NM_020992	PDLIM1	multimodal
NM_021009	UBC	included
NM_021029	RPL36A	excluded
NM_021034	IFITM3	multimodal
NM_021095	SLC5A6	multimodal
NM_021103	TMSB10	included
NM_021104	RPL41	excluded
NM_021109	TMSB4X	included
NM_021128	POLR2L	excluded
NM_021129	PPA1	included
NM_021130	PPIA	excluded
NM_021173	POLD4	excluded
NM_021177	LSM2	multimodal
NM_021203	SRPRB	excluded
NM_021237	SELENOK	excluded
NM_021243	ABRACL	excluded
NM_021709	SIVA1	included
NM_021960	MCL1	multimodal
NM_021999	ITM2B	excluded
NM_022044	SDF2L1	excluded
NM_022100	MRPS14	excluded
NM_022121	PERP	excluded
NM_022130	GOLPH3	excluded
NM_022488	ATG3	excluded
NM_022818	MAP1LC3B	excluded
NM_022873	IFI6	multimodal
NM_022877	SMN2	multimodal
NM_023080	C8orf33	excluded
NM_023934	FUNDC2	excluded
NM_023935	DDRGK1	excluded
NM_023936	MRPS34	middle
NM_024026	MRPL57	excluded
NM_024038	TRIR	included
NM_024051	GGCT	multimodal
NM_024071	ZFYVE21	multimodal
NM_024092	TMEM109	multimodal
NM_024112	C9orf16	excluded
NM_024348	DCTN3	multimodal
NM_024592	SRD5A3	excluded
NM_024613	PLEKHF2	excluded
NM_025124	TMEM134	excluded
NM_025146	NAA50	excluded
NM_030789	HM13	middle
NM_030811	MRPS26	included
NM_030916	NECTIN4	multimodal
NM_030939	C6orf62	multimodal
NM_030978	ARPC5L	excluded
NM_030981	RAB1B	included
NM_031243	HNRNPA2B1	excluded
NM_031263	HNRNPK	excluded
NM_031286	SH3BGRL3	included
NM_031287	SF3B5	multimodal
NM_031298	EMC6	bimodal
NM_031308	EPPK1	excluded
NM_031314	HNRNPC	excluded
NM_031370	HNRNPD	excluded
NM_031372	HNRNPDL	excluded
NM_031420	MRPL9	multimodal
NM_031452	RAMAC	excluded
NM_031844	HNRNPU	excluded
NM_031903	MRPL32	excluded
NM_031991	PTBP1	excluded
NM_032014	MRPS24	included
NM_032112	MRPL43	multimodal
NM_032193	RNASEH2C	excluded
NM_032231	CIAO2A	excluded
NM_032272	MAF1	middle
NM_032286	MED10	excluded
NM_032302	PSMG3	multimodal
NM_032306	ALKBH7	excluded
NM_032338	LLPH	excluded
NM_032339	MIEN1	excluded
NM_032350	C7orf50	multimodal
NM_032353	VPS25	multimodal
NM_032360	ACBD6	excluded
NM_032361	THOC3	excluded
NM_032366	METTL26	multimodal
NM_032412	CYSTM1	excluded
NM_032476	MRPS6	multimodal
NM_032477	MRPL41	included
NM_032479	MRPL36	included
NM_032574	DPY30	multimodal
NM_032656	DHX37	included
NM_032667	BSCL2	excluded
NM_032731	TXNDC17	excluded
NM_032773	LRCH3	included
NM_032901	COX14	multimodal
NM_032906	PYURF	included
NM_032989	BAD	multimodal
NM_033318	SMDT1	excluded
NM_033362	MRPS12	excluded
NM_033363	MRPS12	bimodal
NM_033504	TMEM54	multimodal
NM_033546	MYL12B	excluded
NM_033630	SCAND1	multimodal
NM_033643	RPL36	excluded
NM_033668	ITGB1	multimodal
NM_044472	CDC42	included
NM_052844	WDR34	multimodal
NM_052850	GADD45GIP1	excluded
NM_052886	MAL2	excluded
NM_052951	DNTTIP1	multimodal
NM_053050	MRPL53	multimodal
NM_053056	CCND1	excluded
NM_053275	RPLP0	middle
NM_054014	FKBP1A	included
NM_054016	SRSF10	excluded
NM_080593	HIST1H2BK	included
NM_080626	BRI3BP	included
NM_080648	APEX1	included
NM_080652	TMEM41A	excluded
NM_080821	FAM210B	excluded
NM_130786	A1BG	excluded
NM_133639	RHOV	multimodal
NM_134265	WSB1	excluded
NM_138288	SPTSSA	excluded
NM_138446	MALSU1	excluded
NM_138610	H2AFY	multimodal
NM_138689	PPP1R14B	multimodal
NM_138764	BAX	excluded
NM_138820	HIGD2A	multimodal
NM_138924	GAMT	multimodal
NM_139062	CSNK1D	excluded
NM_139323	YWHAB	excluded
NM_144578	MAPK1IP1L	excluded
NM_144772	NAXE	excluded
NM_145169	SFT2D1	excluded
NM_145252	ZG16B	multimodal
NM_145330	MRPL33	multimodal
NM_145729	MRPL24	multimodal
NM_145792	MGST1	excluded
NM_148912	ABHD11	multimodal
NM_148919	PSMB8	multimodal
NM_148976	PSMA1	middle
NM_152285	ARRDC1	multimodal
NM_152685	SLC23A1	included
NM_152766	TMEM256	multimodal
NM_152862	ARPC2	excluded
NM_153001	PSMC4	excluded
NM_153200	EDF1	included
NM_153201	HSPA8	included
NM_153280	UBA1	excluded
NM_153373	PHYKPL	multimodal
NM_153824	PYCR1	multimodal
NM_170679	SKP1	excluded
NM_170708	LMNA	excluded
NM_170739	MRPL11	excluded
NM_172251	MRPL54	multimodal
NM_173614	NOMO2	multimodal
NM_174886	TGIF1	excluded
NM_174909	TMEM167A	excluded
NM_175732	PTPMT1	excluded
NM_175932	PSMD13	multimodal
NM_176783	PSME1	included
NM_177534	SULT1A1	excluded
NM_177542	SNRPD2	included
NM_177543	PLPP2	included
NM_177552	SULT1A3	excluded
NM_177925	H2AFJ	included
NM_177983	PPM1G	multimodal
NM_178190	ATP5IF1	included
NM_178191	ATP5IF1	included
NM_178578	PSMF1	excluded
NM_178582	HM13	included
NM_180982	MRPL52	excluded
NM_181462	MRPL55	multimodal
NM_181466	EIF6	included
NM_181468	EIF6	included
NM_181528	NAA20	multimodal
NM_181652	PRDX5	middle
NM_181800	UBE2C	bimodal
NM_181836	TMED7	excluded
NM_181843	NUDT8	multimodal
NM_182649	PCNA	excluded
NM_182685	EFNA1	multimodal
NM_182776	MCM7	multimodal
NM_182810	ATF4	included
NM_182917	EIF4G1	excluded
NM_183057	VPS28	included
NM_183237	RNF7	excluded
NM_183241	PAXX	multimodal
NM_183425	RBM38	multimodal
NM_184043	ALDOA	included
NM_194261	UBE2I	excluded
NM_194326	RPS19BP1	multimodal
NM_194434	VAPA	excluded
NM_197955	C15orf48	excluded
NM_197966	BID	excluded
NM_198057	TSC22D3	included
NM_198175	NME1	excluded
NM_198242	EIF4G1	excluded
NM_198426	CHMP2A	multimodal
NM_198536	TMEM205	included
NM_198590	BSG	included
NM_198591	BSG	included
NM_198883	MTX1	multimodal
NM_198976	NELFCD	excluded
NM_199074	NDUFAF3	excluded
NM_199184	DNPH1	multimodal
NM_201384	PLEC	excluded
NM_201397	GPX1	bimodal
NM_201429	RTN3	middle
NM_203298	CHCHD1	excluded
NM_203401	STMN1	excluded
NM_203458	NOTCH2NLA	excluded
NM_203464	AK4	excluded
NM_206917	BEX3	excluded
NM_206918	DEGS2	excluded
NM_207047	ENSA	multimodal
NM_207168	ENSA	included
NM_212460	ARL4A	excluded
NM_212552	BOLA3	excluded
NM_213725	RPLP1	excluded
NR_001317	HCG4B	included
NR_001434	HLA-H	included
NR_001445	RN7SK	multimodal
NR_002201	FTH1P3	multimodal
NR_002308	UQCRBP1	multimodal
NR_002315	H3F3AP4	excluded
NR_002453	SMG1P5	multimodal
NR_002454	LOC606724	included
NR_002556	LOC388242	multimodal
NR_002594	SLC7A5P2	included
NR_002715	RN7SL1	multimodal
NR_002985	SNORA58	bimodal
NR_002988	SNORA74B	included
NR_003010	SCARNA12	included
NR_003015	SNORA53	included
NR_003189	SYS1-DBNDD2	multimodal
NR_003225	LGALS3	excluded
NR_003573	ANXA2P2	included
NR_003605	ZFAS1	excluded
NR_023358	SCARNA9L	included
NR_024206	CYTOR	multimodal
NR_024373	MIR4435-2HG	multimodal
NR_024454	NDUFB2-AS1	excluded
NR_024456	LOC100190986	multimodal
NR_024629	IDI2-AS1	multimodal
NR_026712	RPL13AP5	included
NR_027155	SMG1P3	multimodal
NR_027168	SNHG29	multimodal
NR_027260	RN7SL2	multimodal
NR_027406	LOC100129034	included
NR_027418	LINC00674	excluded
NR_027645	ATP1A1-AS1	bimodal
NR_028052	NGRN	included
NR_028323	SLC5A6	multimodal
NR_028370	PCNA-AS1	excluded
NR_028443	SLC25A5-AS1	excluded
NR_028510	TYRO3P	bimodal
NR_029378	LOC100289511	excluded
NR_029426	SMA4	multimodal
NR_029434	PSMA3-AS1	included
NR_031762	HCP5B	bimodal
NR_033343	PSCA	excluded
NR_034041	SRSF1	excluded
NR_034106	CRNDE	excluded
NR_037600	LINC01578	excluded
NR_037608	SLX1A-SULT1A3	excluded
NR_037609	SLX1B-SULT1A4	multimodal
NR_037673	SERF2-C15ORF63	excluded
NR_037688	ACTG1	included
NR_037717	RNASEK-C17orf49	multimodal
NR_037926	SENP3-EIF4A1	excluded
NR_037928	P2RX5-TAX1BP3	included
NR_037969	SRD5A3-AS1	bimodal
NR_038111	SNHG16	excluded
NR_038193	METTL23	multimodal
NR_038286	PSMD6-AS2	multimodal
NR_038322	MAP3K13	excluded
NR_038410	TSPOAP1-AS1	excluded
NR_038894	CBR3-AS1	multimodal
NR_040049	SDCBP2-AS1	included
NR_045586	SRA1	excluded
NR_046413	POLD4	excluded
NR_046633	NUCB1-AS1	multimodal
NR_046853	HM13-AS1	included
NR_049759	IFITM3	multimodal
NR_051984	PRC1-AS1	bimodal
NR_073084	CRIP2	included
NR_073412	TMEM134	multimodal
NR_073609	PDCD6	included
NR_077246	RPS14P3	bimodal
NR_102318	ACTR3	excluded
NR_102400	PYCARD-AS1	excluded
NR_102427	CIB1	included
NR_103560	GSN-AS1	bimodal
NR_103819	SNRPD3	excluded
NR_104029	DGUOK-AS1	multimodal
NR_104165	MDH2	included
NR_104454	TMEM14B	multimodal
NR_109828	PCBP2-OT1	included
NR_109875	LOC101927100	multimodal
NR_109878	LINC01726	bimodal
NR_110009	ADNP-AS1	included
NR_110044	LOC101926943	multimodal
NR_110578	CSNK1D	excluded
NR_110730	PTOV1-AS2	multimodal
NR_120608	TUBB	excluded
NR_130143	LOC104968399	included
NR_132776	SNORA94	bimodal
NR_133645	S100A16	included
NR_134538	C7orf50	multimodal
NR_134671	TRAPPC2L	excluded
NR_134848	GAA	multimodal
NR_134869	HEXA	multimodal
NR_135305	SMG1P2	multimodal
NR_135587	DPY30	middle
NR_136278	LOC105375713	included
NR_136587	RBM39	bimodal
NR_138060	ARL16	multimodal
NR_144447	ZNF8-ERVK3-1	multimodal
NR_144567	MALAT1	included
NR_145425	RUSC1-AS1	included
NR_145721	SNORA74C-1	included
NR_145819	RNA45SN1	excluded
NR_145820	RNA18SN1	included
NR_145822	RNA28SN1	multimodal
NR_146063	SMIM27	included
NR_146144	RNA45SN2	excluded
NR_146146	RNA18SN2	middle
NR_146148	RNA28SN2	multimodal
NR_146151	RNA45SN3	excluded
NR_146152	RNA18SN3	middle
NR_146154	RNA28SN3	multimodal
NR_146274	KRT7-AS	included
NR_146472	ELF3-AS1	bimodal
NR_146967	C7orf50	multimodal
NR_147233	TPM1-AS	multimodal
NR_148712	ENOSF1	bimodal
NR_155756	TBCB	excluded
NR_157088	CLTB	excluded
NR_157580	LOC440292	excluded
NR_158216	LOC105370687	excluded
NR_160308	GCNT7	bimodal
NR_160400	TIMM8B	multimodal
NR_160950	SNHG32	excluded
NR_163478	NA	excluded
NR_163943	NA	excluded
NR_171558	NA	bimodal
NR_171559	NA	bimodal
NR_171562	NA	bimodal

## Sheet: SRP131647_CTCclusters
APA_ID	Gene_Symbol	Modality
NM_000050	ASS1	excluded
NM_000099	CST3	middle
NM_000100	CSTB	included
NM_000101	CYBA	multimodal
NM_000146	FTL	included
NM_000269	NME1	excluded
NM_000270	PNP	multimodal
NM_000291	PGK1	excluded
NM_000294	PHKG2	multimodal
NM_000310	PPT1	middle
NM_000365	TPI1	included
NM_000454	SOD1	excluded
NM_000485	APRT	excluded
NM_000507	FBP1	multimodal
NM_000574	CD55	excluded
NM_000581	GPX1	multimodal
NM_000700	ANXA1	excluded
NM_000701	ATP1A1	excluded
NM_000712	BLVRA	multimodal
NM_000713	BLVRB	excluded
NM_000714	TSPO	included
NM_000754	COMT	excluded
NM_000801	FKBP1A	excluded
NM_000852	GSTP1	excluded
NM_000903	NQO1	excluded
NM_000918	P4HB	included
NM_000943	PPIC	excluded
NM_000968	RPL4	excluded
NM_000971	RPL7	excluded
NM_000975	RPL11	excluded
NM_000977	RPL13	excluded
NM_000978	RPL23	excluded
NM_000981	RPL19	middle
NM_000983	RPL22	excluded
NM_000984	RPL23A	excluded
NM_000990	RPL27A	excluded
NM_000991	RPL28	excluded
NM_000992	RPL29	middle
NM_000993	RPL31	excluded
NM_000994	RPL32	excluded
NM_000996	RPL35A	excluded
NM_000997	RPL37	excluded
NM_000998	RPL37A	excluded
NM_001000	RPL39	included
NM_001001	RPL36AL	excluded
NM_001001392	CD44	excluded
NM_001001503	NDUFV3	excluded
NM_001001701	C4orf3	excluded
NM_001002027	ATP5MC1	included
NM_001002033	JPT1	excluded
NM_001002248	ANAPC11	included
NM_001002258	ATP5MC3	excluded
NM_001002858	ANXA2	excluded
NM_001004333	RNASEK	included
NM_001005354	PRR13	included
NM_001005474	NFKBIZ	excluded
NM_001005781	SUMO1	excluded
NM_001006941	ALG3	excluded
NM_001007	RPS4X	excluded
NM_001007070	SDCBP	multimodal
NM_001007074	RPL32	excluded
NM_001007214	CACYBP	excluded
NM_001007565	TFG	middle
NM_001008709	PPP1CA	included
NM_001009184	GRINA	excluded
NM_001009186	CCT6A	excluded
NM_001009570	CCT7	included
NM_001010	RPS6	excluded
NM_001010858	RNF187	excluded
NM_001010974	BCAS4	multimodal
NM_001010989	HERPUD1	excluded
NM_001011537	FYTTD1	multimodal
NM_001012	RPS8	excluded
NM_001012270	BIRC5	excluded
NM_001012300	MCRS1	multimodal
NM_001012664	SLC3A2	included
NM_001013653	LRRC26	multimodal
NM_001014763	ETFB	multimodal
NM_001014990	MRPL22	excluded
NM_001017390	SULT1A4	multimodal
NM_001017963	HSP90AA1	excluded
NM_001017998	GNG10	excluded
NM_001018004	TPM1	bimodal
NM_001018067	SERBP1	excluded
NM_001018136	NME1-NME2	included
NM_001018837	HAX1	multimodal
NM_001019	RPS15A	excluded
NM_001022	RPS19	excluded
NM_001023	RPS20	middle
NM_001024212	S100A13	included
NM_001024844	CD82	excluded
NM_001024957	BRMS1	multimodal
NM_001024960	ARPC4	included
NM_001025	RPS23	excluded
NM_001025071	RPS14	excluded
NM_001025205	AP2M1	included
NM_001029	RPS26	excluded
NM_001030018	APRT	included
NM_001030287	ATF3	multimodal
NM_001031	RPS28	excluded
NM_001031677	RAB24	excluded
NM_001031684	SRSF7	excluded
NM_001031711	ERGIC1	multimodal
NM_001032409	OAS1	multimodal
NM_001033056	GLUL	excluded
NM_001033503	SAR1B	excluded
NM_001034	RRM2	excluded
NM_001034025	ERP29	excluded
NM_001035005	C18orf32	excluded
NM_001035513	SDHC	excluded
NM_001037164	ARL4A	excluded
NM_001037494	DYNLL1	middle
NM_001037811	HSD17B10	multimodal
NM_001039457	ATP6V0B	included
NM_001039490	CD151	excluded
NM_001039577	CCNL2	multimodal
NM_001039712	DEDD	multimodal
NM_001040431	COA3	included
NM_001040619	ATF3	multimodal
NM_001040649	ACP1	multimodal
NM_001040874	HIST2H2AA4	bimodal
NM_001042432	CLN3	multimodal
NM_001042462	TRAPPC5	excluded
NM_001042465	PSAP	included
NM_001042472	ABHD12	multimodal
NM_001042483	NUPR1	excluded
NM_001042679	RHOC	included
NM_001043352	TPM3	excluded
NM_001048249	SMIM15	excluded
NM_001069	TUBB2A	multimodal
NM_001070	TUBG1	multimodal
NM_001077399	PNKD	included
NM_001077628	APH1A	included
NM_001078166	SRSF1	excluded
NM_001079862	DBI	included
NM_001085365	MZT2A	multimodal
NM_001085372	UQCC3	excluded
NM_001086521	NDUFAF8	multimodal
NM_001089591	UQCRHL	excluded
NM_001098208	HNRNPF	excluded
NM_001098398	COPA	excluded
NM_001098616	C1orf43	included
NM_001098673	ATG101	multimodal
NM_001098786	HILPDA	excluded
NM_001099406	SLC39A6	multimodal
NM_001099639	ZNF146	excluded
NM_001099645	RPL22L1	excluded
NM_001099668	HIGD1A	excluded
NM_001099693	RPL31	middle
NM_001101	ACTB	middle
NM_001102667	PSMA4	multimodal
NM_001102668	PSMA4	excluded
NM_001105204	RUSC1	multimodal
NM_001105205	RUSC1	multimodal
NM_001110503	TMEM87A	multimodal
NM_001113205	TSTD1	included
NM_001122955	BSCL2	multimodal
NM_001123355	PPP6C	excluded
NM_001123377	PARK7	excluded
NM_001126051	HDGF	multimodal
NM_001127192	CNBP	excluded
NM_001127198	TMC6	excluded
NM_001127213	LY6E	multimodal
NM_001127223	CD59	excluded
NM_001127393	ATP5MPL	excluded
NM_001127394	TSEN15	multimodal
NM_001127889	SPG21	multimodal
NM_001128203	PLAAT3	excluded
NM_001128914	PCBP2	multimodal
NM_001130004	ACTN1	excluded
NM_001130674	CALU	excluded
NM_001130678	EIF4E	excluded
NM_001130689	HMGB2	excluded
NM_001130725	PSMB5	included
NM_001130929	STMP1	excluded
NM_001134321	RTL8A	included
NM_001134484	TOMM5	multimodal
NM_001134493	TOMM6	middle
NM_001135239	LDHA	excluded
NM_001135255	RBBP4	included
NM_001135592	RPS27A	excluded
NM_001135694	VDAC3	included
NM_001135702	YWHAZ	excluded
NM_001135998	NDUFB11	included
NM_001136008	FXYD3	bimodal
NM_001136010	FXYD3	bimodal
NM_001136016	APP	middle
NM_001136017	CCND3	multimodal
NM_001136134	RPL28	excluded
NM_001136136	RPL28	included
NM_001136137	RPL28	included
NM_001136232	SEC13	included
NM_001136268	DAZAP2	multimodal
NM_001136275	AKIRIN1	excluded
NM_001136497	BTF3L4	excluded
NM_001136498	CISD3	excluded
NM_001137553	LRRFIP1	excluded
NM_001139457	BCAP31	middle
NM_001142298	SQSTM1	included
NM_001142418	MORF4L2	included
NM_001142625	RAB34	multimodal
NM_001142627	SEC61A2	bimodal
NM_001142648	SAR1A	excluded
NM_001142798	C17orf49	multimodal
NM_001142799	C17orf49	multimodal
NM_001143681	GSTK1	multimodal
NM_001143760	EIF5A	middle
NM_001143780	SLC25A39	multimodal
NM_001143841	TMEM106C	middle
NM_001143937	PSMA1	included
NM_001143985	BANF1	middle
NM_001144831	PHB2	included
NM_001144932	PSMB5	included
NM_001144943	RAB34	multimodal
NM_001144944	MYL12B	excluded
NM_001145145	SLC1A5	middle
NM_001145155	NR2F2	excluded
NM_001145156	NR2F2	excluded
NM_001145160	TPM4	included
NM_001145355	CBWD1	excluded
NM_001145410	NONO	multimodal
NM_001145412	NFE2L2	excluded
NM_001145713	SAE1	excluded
NM_001145940	PAFAH1B3	included
NM_001146068	CAPN2	included
NM_001146178	IP6K2	multimodal
NM_001146191	MPZL1	excluded
NM_001146333	SUMF2	included
NM_001151	SLC25A4	excluded
NM_001152	SLC25A5	middle
NM_001154	ANXA5	excluded
NM_001159287	TPI1	included
NM_001162407	CLK1	excluded
NM_001163424	COPS9	included
NM_001164189	PLIN3	middle
NM_001165415	LDHA	excluded
NM_001165931	RRM2	excluded
NM_001166103	SPINT2	excluded
NM_001166237	GSDMD	multimodal
NM_001168331	NDUFB4	included
NM_001170406	CDK1	multimodal
NM_001170634	FUS	excluded
NM_001170795	ATRAID	included
NM_001171508	MCFD2	excluded
NM_001171511	MCFD2	excluded
NM_001172415	BAG1	excluded
NM_001172695	TSFM	excluded
NM_001172705	EIF4G2	included
NM_001173128	YTHDF2	excluded
NM_001177	ARL1	excluded
NM_001177643	DAG1	excluded
NM_001178087	SERF1B	multimodal
NM_001183	ATP6AP1	bimodal
NM_001184722	GPI	excluded
NM_001184730	PIGT	included
NM_001184740	CTTN	included
NM_001184761	CLTA	included
NM_001184823	VDAC2	excluded
NM_001184891	FLAD1	multimodal
NM_001184979	NDUFS5	included
NM_001185	AZGP1	excluded
NM_001185012	NDUFA2	excluded
NM_001185077	ARHGDIA	middle
NM_001185092	NIT1	multimodal
NM_001190329	ATP5MC3	excluded
NM_001190452	MTRNR2L1	excluded
NM_001190470	MTRNR2L2	excluded
NM_001190472	MTRNR2L3	included
NM_001190702	MTRNR2L8	excluded
NM_001190706	MTRNR2L9	excluded
NM_001190864	MRPS35	excluded
NM_001190991	CNPY2	included
NM_001190996	ARPC1A	included
NM_001191003	GSTO1	middle
NM_001193557	ENY2	excluded
NM_001193572	CSRP1	included
NM_001193655	CYBC1	excluded
NM_001195056	DDIT3	multimodal
NM_001195427	SRSF2	included
NM_001195478	TFG	middle
NM_001195536	CHMP5	excluded
NM_001197139	DBNDD2	multimodal
NM_001198569	ATP6V0C	excluded
NM_001198719	RBBP7	excluded
NM_001198846	RBM14-RBM4	included
NM_001198868	CAPN1	multimodal
NM_001199038	SERINC2	excluded
NM_001199142	EIF3C	excluded
NM_001199355	RPL17-C18orf32	excluded
NM_001199535	TGIF2-RAB5IF	multimodal
NM_001199780	PSMB2	excluded
NM_001199786	FKBP1A	excluded
NM_001199851	DAP3	excluded
NM_001199876	SERF2	excluded
NM_001199877	SERF2	excluded
NM_001199954	ACTG1	included
NM_001199957	NDUFB5	excluded
NM_001199975	UQCRB	excluded
NM_001201483	ENO1	included
NM_001202547	SYNJ2BP-COX16	excluded
NM_001204054	NDUFC2	excluded
NM_001204064	CHURC1	excluded
NM_001204082	MICOS10	excluded
NM_001204193	SRP19	excluded
NM_001204196	SRP19	excluded
NM_001204199	SRP19	included
NM_001204861	ELOC	excluded
NM_001206486	ATF3	multimodal
NM_001206799	PKM	included
NM_001206836	RAB11A	excluded
NM_001207000	HNRNPDL	excluded
NM_001212	C1QBP	included
NM_001220777	CDKN1A	middle
NM_001236	CBR3	multimodal
NM_001242375	ANAPC13	excluded
NM_001242598	TMEM147	middle
NM_001242831	ELOVL5	included
NM_001242839	GUK1	included
NM_001242840	GUK1	included
NM_001242854	ARFIP2	multimodal
NM_001242891	CSDE1	excluded
NM_001242918	ZFAND6	multimodal
NM_001243131	RPL13	excluded
NM_001243252	EFHD1	multimodal
NM_001243646	CD2BP2	excluded
NM_001243719	RAB6A	multimodal
NM_001243799	TSC22D1	excluded
NM_001243885	TOB1	excluded
NM_001243892	TPD52L2	multimodal
NM_001244572	BID	excluded
NM_001244644	CHMP2B	excluded
NM_001244701	ZFP36L1	excluded
NM_001244812	FOXP1	excluded
NM_001251918	RAP1B	excluded
NM_001252053	PCMT1	multimodal
NM_001252273	DIPK1A	included
NM_001253379	RPL15	excluded
NM_001253764	SRA1	excluded
NM_001253790	SMIM22	excluded
NM_001253816	SLC52A2	multimodal
NM_001254738	RND3	excluded
NM_001256165	TMCO1	excluded
NM_001256281	RAB34	multimodal
NM_001256302	ETF1	excluded
NM_001256355	UBE2L3	excluded
NM_001256399	ELOVL1	multimodal
NM_001256534	SLC25A1	included
NM_001256580	RPL10	excluded
NM_001256721	CCT4	excluded
NM_001256829	TMEM265	excluded
NM_001256879	POLD2	multimodal
NM_001256891	SRI	multimodal
NM_001257096	PAX1	bimodal
NM_001257335	ATP5F1A	excluded
NM_001257401	CD63	excluded
NM_001258028	TKT	excluded
NM_001258289	SELENBP1	multimodal
NM_001258320	TP53I11	multimodal
NM_001258384	IDH3B	included
NM_001258423	SMS	excluded
NM_001260506	RPS3	excluded
NM_001260507	RPS3	excluded
NM_001261400	PSMD9	excluded
NM_001261401	TSN	excluded
NM_001261466	ADAM15	multimodal
NM_001265591	RTN3	middle
NM_001265603	MORF4L1	excluded
NM_001267061	SNX17	multimodal
NM_001267558	PDCD6	multimodal
NM_001267699	RPS3A	included
NM_001267700	PHB2	included
NM_001267708	ZNF706	excluded
NM_001267809	ILF2	excluded
NM_001267817	OSTC	excluded
NM_001270399	TUBA1A	multimodal
NM_001270439	ARPC5	excluded
NM_001270447	ACADVL	included
NM_001270481	PSMB6	included
NM_001270482	PSMD11	excluded
NM_001270491	RPL13A	excluded
NM_001270550	MDK	excluded
NM_001270552	MDK	excluded
NM_001270837	CRIP2	included
NM_001270896	TRAPPC3	excluded
NM_001270987	LTBR	multimodal
NM_001271213	SQOR	multimodal
NM_001271641	MTCH1	included
NM_001271734	COPZ1	multimodal
NM_001271742	CSNK1A1	excluded
NM_001271849	CDK2AP2	middle
NM_001271878	KHDRBS1	excluded
NM_001271918	SEC11A	middle
NM_001271957	SLC39A1	multimodal
NM_001271970	HSP90AB1	included
NM_001271998	RAB4A	excluded
NM_001272007	ISCA2	excluded
NM_001272038	RAB13	multimodal
NM_001272053	MRFAP1	included
NM_001272083	SHISA5	multimodal
NM_001277199	CNIH4	excluded
NM_001277224	TAGLN2	included
NM_001277764	CIB1	excluded
NM_001278191	TPM3	excluded
NM_001278197	CDK5RAP3	multimodal
NM_001278243	ZFAND5	excluded
NM_001278244	ZFAND5	excluded
NM_001278263	CARHSP1	excluded
NM_001278265	CARHSP1	excluded
NM_001278346	PHYKPL	multimodal
NM_001278379	ARL6IP4	multimodal
NM_001278555	UBE2E3	multimodal
NM_001278556	ARPC3	excluded
NM_001278645	NDUFB9	included
NM_001278656	SNRPD3	excluded
NM_001278700	POLR2H	multimodal
NM_001278712	ATG3	multimodal
NM_001278946	SEC13	included
NM_001279360	LYPLA1	excluded
NM_001280	CIRBP	included
NM_001280557	SLC39A4	included
NM_001280789	SURF4	included
NM_001280790	SURF4	multimodal
NM_001281297	EDF1	included
NM_001281427	DCTN3	multimodal
NM_001281434	ZNHIT3	multimodal
NM_001281437	ADRM1	multimodal
NM_001281447	GTF2IRD2	excluded
NM_001281474	MLPH	excluded
NM_001281496	PHB	excluded
NM_001281497	PHB	excluded
NM_001281512	HADHB	middle
NM_001281529	PSME1	included
NM_001281532	PSENEN	excluded
NM_001281716	UBB	included
NM_001281719	UBB	included
NM_001282150	VPS29	excluded
NM_001282161	UBE2A	excluded
NM_001282162	CAPZB	excluded
NM_001282205	SIGMAR1	multimodal
NM_001282234	PSMA6	included
NM_001282385	CSNK2B	multimodal
NM_001282404	MDH2	excluded
NM_001282576	UBE2V1	multimodal
NM_001282580	UBE2V1	multimodal
NM_001282604	PTGES3	middle
NM_001282606	TMBIM4	excluded
NM_001282621	PGRMC1	bimodal
NM_001282625	LMNA	included
NM_001282652	STIP1	excluded
NM_001282674	BEX3	middle
NM_001283037	RTF2	excluded
NM_001284239	SARAF	middle
NM_001284367	NDUFB8	included
NM_001284368	NDUFB8	multimodal
NM_001284502	NUBP2	multimodal
NM_001285450	PDXDC1	multimodal
NM_001286056	CNN3	excluded
NM_001286084	TRMT112	included
NM_001286086	C11orf98	multimodal
NM_001286110	CLN3	excluded
NM_001286272	TPT1	excluded
NM_001286416	SUMO3	middle
NM_001286435	NME4	multimodal
NM_001286436	NME4	multimodal
NM_001286487	TMEM87A	excluded
NM_001286706	UFM1	excluded
NM_001286773	OCIAD2	excluded
NM_001286789	CBR1	multimodal
NM_001286836	CBWD5	middle
NM_001287032	STOML2	excluded
NM_001287392	COMMD6	excluded
NM_001287434	CCND3	multimodal
NM_001287588	SLC50A1	multimodal
NM_001287592	SLC50A1	multimodal
NM_001287744	FDFT1	excluded
NM_001287747	FDFT1	excluded
NM_001288	CLIC1	middle
NM_001288565	TMEM9	middle
NM_001288610	JPT1	excluded
NM_001288659	METTL9	middle
NM_001288660	METTL9	middle
NM_001288756	BABAM1	excluded
NM_001288978	XRCC6	included
NM_001289414	ANAPC11	excluded
NM_001289797	PCBD1	included
NM_001289910	IDH2	multimodal
NM_001290135	EI24	excluded
NM_001290193	MYADM	excluded
NM_001290309	CTNNA1	multimodal
NM_001290553	ADIPOR1	excluded
NM_001290557	ADIPOR1	excluded
NM_001291304	NDUFA5	excluded
NM_001291428	BAX	excluded
NM_001291430	BAX	multimodal
NM_001291431	BAX	excluded
NM_001291739	CD24	excluded
NM_001291916	SNRPD1	excluded
NM_001293179	PRSS23	excluded
NM_001293180	PRSS23	excluded
NM_001293213	TUBB	multimodal
NM_001293214	TUBB	excluded
NM_001294332	SDHA	excluded
NM_001294333	ATP6V0B	included
NM_001297418	HNRNPM	multimodal
NM_001297566	UQCRH	included
NM_001297723	C1orf43	included
NM_001297738	TBCA	included
NM_001300	KLF6	excluded
NM_001300795	UBE2D3	excluded
NM_001300796	RAN	excluded
NM_001300829	CIRBP	excluded
NM_001300888	PBDC1	excluded
NM_001300900	MRPS34	middle
NM_001300901	TCEAL4	excluded
NM_001300902	CD55	multimodal
NM_001300914	DNAJB1	included
NM_001301020	OAZ1	excluded
NM_001301068	ARL1	excluded
NM_001301076	AP2S1	included
NM_001301241	ARHGDIA	included
NM_001301242	ARHGDIA	included
NM_001301834	C12orf57	included
NM_001301836	C12orf57	included
NM_001302545	AAMP	excluded
NM_001303007	DDAH2	multimodal
NM_001303048	MYL12A	middle
NM_001303060	TMED4	included
NM_001303062	TMED4	middle
NM_001303114	TUBA1C	included
NM_001303117	TUBA1C	excluded
NM_001303235	ISG20	excluded
NM_001303247	WDR61	excluded
NM_001303499	CNN2	multimodal
NM_001303507	PPP4C	multimodal
NM_001304451	PGD	excluded
NM_001305	CLDN4	multimodal
NM_001305043	TMEM59	excluded
NM_001305066	TMEM59	included
NM_001305626	CALM2	middle
NM_001305841	TCEAL4	excluded
NM_001306	CLDN3	excluded
NM_001306153	CCT5	excluded
NM_001306154	CCT5	excluded
NM_001307	CLDN7	excluded
NM_001308036	NCBP2	multimodal
NM_001308043	CFLAR	multimodal
NM_001308205	SSR3	excluded
NM_001308396	MRPL43	multimodal
NM_001308824	SF3B1	multimodal
NM_001309861	GNAS	excluded
NM_001309883	GNAS	included
NM_001310315	TUBB2A	multimodal
NM_001310326	UBE2T	excluded
NM_001311	CRIP1	excluded
NM_001311203	CLTA	included
NM_001311311	VKORC1	included
NM_001312653	HIST1H2BK	bimodal
NM_001313858	ARL6IP1	multimodal
NM_001313893	HMGB1	excluded
NM_001313932	CAPZB	included
NM_001313941	RHOA	middle
NM_001313993	IGFBP2	excluded
NM_001314039	DNAJA1	excluded
NM_001316374	MDH1	multimodal
NM_001317007	S100A16	included
NM_001317008	S100A16	included
NM_001317111	MOB1A	excluded
NM_001317167	SNRPG	excluded
NM_001317231	MTCH2	excluded
NM_001317783	TSTA3	included
NM_001317856	EIF3CL	excluded
NM_001317897	SMIM14	excluded
NM_001317956	IDI1	excluded
NM_001317968	ARRDC1	multimodal
NM_001317981	RPL26L1	excluded
NM_001318015	ZDHHC12	multimodal
NM_001318016	ZDHHC12	multimodal
NM_001318020	ZDHHC12	multimodal
NM_001318051	NDUFS4	excluded
NM_001318058	DMAC1	excluded
NM_001318188	HNRNPK	excluded
NM_001318236	LAMTOR4	included
NM_001318237	LAMTOR4	included
NM_001318252	C7orf50	multimodal
NM_001318485	MRPL20	included
NM_001318494	TRAPPC4	excluded
NM_001318526	TRAPPC2L	excluded
NM_001318527	TRAPPC2L	excluded
NM_001318770	MRPL14	excluded
NM_001318788	COX4I1	included
NM_001318794	COX4I1	included
NM_001318797	COX4I1	excluded
NM_001318825	HEXA	excluded
NM_001318848	CNPY3	multimodal
NM_001318863	DGUOK	multimodal
NM_001318942	MEA1	included
NM_001319036	COX7A2L	multimodal
NM_001319040	COX7A2L	multimodal
NM_001319068	ITGB1BP1	excluded
NM_001319081	HMGA1	multimodal
NM_001319086	RUVBL1	included
NM_001319137	CTSH	excluded
NM_001319140	AK2	excluded
NM_001319157	DYNLRB1	included
NM_001319184	RNPEP	multimodal
NM_001319188	HDGF	multimodal
NM_001319236	RPL34	excluded
NM_001319991	SUPT5H	multimodal
NM_001320194	NACA	included
NM_001320327	CHCHD2	included
NM_001320397	PCNP	excluded
NM_001320523	SYNGR2	included
NM_001320597	DDX5	excluded
NM_001320628	BOLA2-SMG1P6	middle
NM_001320651	U2AF1L5	multimodal
NM_001320778	SCAMP2	multimodal
NM_001320904	DTYMK	bimodal
NM_001320913	FXYD5	excluded
NM_001320929	GTF2A2	excluded
NM_001320979	AKR7A2	excluded
NM_001321017	UBA52	excluded
NM_001321021	UBA52	excluded
NM_001321170	TECR	middle
NM_001321185	TMC6	multimodal
NM_001321335	SELENOH	excluded
NM_001321367	CD99	included
NM_001321369	CD99	excluded
NM_001321421	ARHGDIB	multimodal
NM_001321423	ARHGDIB	multimodal
NM_001321441	AHSA1	multimodal
NM_001321648	NUDT5	excluded
NM_001321688	BZW1	excluded
NM_001321690	BZW1	middle
NM_001321704	RPS9	middle
NM_001321845	COMMD4	multimodal
NM_001321970	MRPS11	excluded
NM_001321973	MRPS11	bimodal
NM_001321974	MRPS11	bimodal
NM_001322033	ACTN4	middle
NM_001322086	AHCY	multimodal
NM_001322959	TMEM183A	excluded
NM_001322970	OAT	multimodal
NM_001323011	PMVK	multimodal
NM_001323027	IQCG	included
NM_001323030	IQCG	included
NM_001323069	PFKP	multimodal
NM_001323073	PFKP	multimodal
NM_001323423	RBM39	excluded
NM_001323960	RBCK1	included
NM_001323985	CTNNA1	multimodal
NM_001324303	RPN2	multimodal
NM_001324306	RPN2	multimodal
NM_001329402	VMP1	excluded
NM_001329417	TMA7	excluded
NM_001329502	GPX1	multimodal
NM_001329503	GPX1	multimodal
NM_001329559	TIMM50	excluded
NM_001329570	NIPSNAP3A	excluded
NM_001329609	ARL16	multimodal
NM_001329678	PAXX	multimodal
NM_001329722	TMEM54	multimodal
NM_001329752	FAM136A	excluded
NM_001329921	CALM3	excluded
NM_001330176	COPRS	multimodal
NM_001330200	RPL19	middle
NM_001330206	MIEN1	excluded
NM_001330269	ATP5MC2	included
NM_001330284	MZT2B	included
NM_001330286	DUT	excluded
NM_001330312	CD9	excluded
NM_001330337	CBWD2	excluded
NM_001330393	VEZF1	excluded
NM_001330421	CYB561	excluded
NM_001330426	NAGK	excluded
NM_001330469	COPE	excluded
NM_001330536	CENPX	included
NM_001330692	PSMD4	included
NM_001330985	TMEM230	multimodal
NM_001344	DAD1	included
NM_001346500	CD164	excluded
NM_001346663	TK1	multimodal
NM_001346879	POLR2H	included
NM_001347892	TMX2	included
NM_001348065	DCTN2	excluded
NM_001348129	NBDY	excluded
NM_001348133	CCNI	excluded
NM_001348957	SMIM26	included
NM_001348958	SMIM26	excluded
NM_001350968	C7orf50	multimodal
NM_001351263	TSPAN15	excluded
NM_001352773	JUP	middle
NM_001352777	JUP	multimodal
NM_001353053	GSN	excluded
NM_001353264	FAM49B	excluded
NM_001353337	ANKRD36B	excluded
NM_001353402	NDUFAF8	multimodal
NM_001354457	PLPP5	multimodal
NM_001354845	CCNB1	excluded
NM_001354928	VCP	excluded
NM_001355006	NPM1	multimodal
NM_001355009	NPM1	included
NM_001355019	PPP2CA	excluded
NM_001355401	NPIPB12	multimodal
NM_001357	DHX9	excluded
NM_001357943	GAPDH	included
NM_001359651	PEF1	middle
NM_001362531	CKB	multimodal
NM_001362750	AHCY	excluded
NM_001362896	PUF60	included
NM_001363000	THEM6	bimodal
NM_001363602	NDUFS7	included
NM_001363669	CALM1	excluded
NM_001363673	ELOF1	multimodal
NM_001363688	NPC2	included
NM_001363695	PPT1	middle
NM_001363697	RPL28	bimodal
NM_001363735	TMED3	included
NM_001363778	SYNGR2	included
NM_001363785	EIF3L	excluded
NM_001363810	VMA21	excluded
NM_001363848	TK1	multimodal
NM_001363860	RPS16	excluded
NM_001363872	PLSCR1	excluded
NM_001363881	HMCES	multimodal
NM_001363887	LRCH3	included
NM_001363963	DERL1	excluded
NM_001363994	CANX	middle
NM_001364007	NOTCH2NLB	excluded
NM_001364008	NOTCH2NLB	excluded
NM_001364013	NOTCH2NLC	excluded
NM_001364126	CLTB	multimodal
NM_001364127	CLTB	multimodal
NM_001364239	HNRNPH1	multimodal
NM_001364683	TPM3	included
NM_001365304	LOC112694756	included
NM_001365717	LRCH3	included
NM_001365719	LRCH3	included
NM_001365754	MIF4GD	included
NM_001365761	MICOS13	included
NM_001365774	ALDH9A1	excluded
NM_001365776	TPM1	multimodal
NM_001365777	TPM1	multimodal
NM_001365782	TPM1	multimodal
NM_001366292	COX7A2	excluded
NM_001366293	COX7A2	included
NM_001366481	RPL7L1	excluded
NM_001366643	SAP18	excluded
NM_001366994	IFI27	multimodal
NM_001367837	TPM4	included
NM_001369744	ITGB1BP1	excluded
NM_001369751	SNRPD2	included
NM_001369752	SNRPD2	included
NM_001369859	PTP4A2	excluded
NM_001370177	NA	excluded
NM_001370340	NA	excluded
NM_001370345	NA	excluded
NM_001371394	NA	excluded
NM_001371720	NA	multimodal
NM_001371734	NA	excluded
NM_001374178	NA	multimodal
NM_001374326	NA	excluded
NM_001374407	NA	multimodal
NM_001374512	NA	multimodal
NM_001374593	NA	excluded
NM_001375354	NA	multimodal
NM_001375991	NA	included
NM_001376560	NA	multimodal
NM_001376902	NA	multimodal
NM_001377298	NA	multimodal
NM_001377300	NA	included
NM_001377527	NA	multimodal
NM_001378351	NA	multimodal
NM_001378451	NA	excluded
NM_001378495	NA	multimodal
NM_001379043	NA	excluded
NM_001379366	NA	included
NM_001381852	NA	included
NM_001381911	NA	excluded
NM_001381943	NA	multimodal
NM_001382003	NA	included
NM_001382225	NA	included
NM_001382293	NA	included
NM_001382294	NA	middle
NM_001382365	NA	middle
NM_001382366	NA	middle
NM_001382542	NA	multimodal
NM_001382727	NA	multimodal
NM_001382730	NA	multimodal
NM_001384280	NA	included
NM_001384714	NA	excluded
NM_001384982	NA	multimodal
NM_001385254	NA	excluded
NM_001385265	NA	excluded
NM_001385266	NA	excluded
NM_001386740	NA	excluded
NM_001386875	NA	excluded
NM_001387651	NA	multimodal
NM_001387846	NA	excluded
NM_001388314	NA	included
NM_001388318	NA	excluded
NM_001393653	NA	excluded
NM_001393915	NA	excluded
NM_001393919	NA	excluded
NM_001394000	NA	excluded
NM_001394149	NA	excluded
NM_001394674	NA	excluded
NM_001394769	NA	multimodal
NM_001398	ECH1	included
NM_001402	EEF1A1	excluded
NM_001404	EEF1G	included
NM_001418	EIF4G2	included
NM_001424	EMP2	excluded
NM_001487	BLOC1S1	excluded
NM_001537	HSBP1	excluded
NM_001540	HSPB1	middle
NM_001554	CCN1	excluded
NM_001618	PARP1	excluded
NM_001636	SLC25A6	middle
NM_001647	APOD	excluded
NM_001658	ARF1	included
NM_001660	ARF4	included
NM_001662	ARF5	included
NM_001675	ATF4	included
NM_001677	ATP1B1	excluded
NM_001679	ATP1B3	excluded
NM_001686	ATP5F1B	included
NM_001687	ATP5F1D	included
NM_001688	ATP5PB	excluded
NM_001731	BTG1	excluded
NM_001743	CALM2	middle
NM_001757	CBR1	excluded
NM_001777	CD47	excluded
NM_001791	CDC42	excluded
NM_001826	CKS1B	included
NM_001827	CKS2	multimodal
NM_001862	COX5B	excluded
NM_001866	COX7B	excluded
NM_001867	COX7C	excluded
NM_001878	CRABP2	bimodal
NM_001909	CTSD	middle
NM_001914	CYB5A	excluded
NM_001916	CYC1	included
NM_001961	EEF2	middle
NM_001967	EIF4A2	middle
NM_001985	ETFB	multimodal
NM_002014	FKBP4	excluded
NM_002085	GPX4	included
NM_002086	GRB2	multimodal
NM_002087	GRN	included
NM_002094	GSPT1	excluded
NM_002097	GTF3A	multimodal
NM_002106	H2AFZ	included
NM_002116	HLA-A	middle
NM_002117	HLA-C	multimodal
NM_002136	HNRNPA1	excluded
NM_002139	RBMX	middle
NM_002156	HSPD1	multimodal
NM_002157	HSPE1	excluded
NM_002165	ID1	bimodal
NM_002166	ID2	excluded
NM_002167	ID3	bimodal
NM_002168	IDH2	excluded
NM_002228	JUN	excluded
NM_002266	KPNA2	excluded
NM_002273	KRT8	included
NM_002276	KRT19	included
NM_002295	RPSA	excluded
NM_002306	LGALS3	excluded
NM_002337	LRPAP1	excluded
NM_002354	EPCAM	excluded
NM_002437	MPV17	multimodal
NM_002455	MTX1	multimodal
NM_002488	NDUFA2	excluded
NM_002489	NDUFA4	excluded
NM_002490	NDUFA6	excluded
NM_002491	NDUFB3	included
NM_002493	NDUFB6	excluded
NM_002534	OAS1	bimodal
NM_002537	OAZ2	multimodal
NM_002567	PEBP1	excluded
NM_002568	PABPC1	excluded
NM_002573	PAFAH1B3	included
NM_002629	PGAM1	bimodal
NM_002635	SLC25A3	excluded
NM_002695	POLR2E	excluded
NM_002696	POLR2G	multimodal
NM_002710	PPP1CC	multimodal
NM_002773	PRSS8	bimodal
NM_002787	PSMA2	excluded
NM_002790	PSMA5	excluded
NM_002791	PSMA6	included
NM_002792	PSMA7	multimodal
NM_002793	PSMB1	included
NM_002798	PSMB6	included
NM_002806	PSMC6	excluded
NM_002808	PSMD2	bimodal
NM_002810	PSMD4	multimodal
NM_002811	PSMD7	excluded
NM_002812	PSMD8	multimodal
NM_002815	PSMD11	excluded
NM_002823	PTMA	middle
NM_002904	NELFE	excluded
NM_002939	RNH1	included
NM_002947	RPA3	excluded
NM_002948	RPL15	excluded
NM_002949	MRPL12	multimodal
NM_002950	RPN1	excluded
NM_002952	RPS2	included
NM_002965	S100A9	multimodal
NM_002966	S100A10	middle
NM_002970	SAT1	included
NM_002997	SDC1	excluded
NM_002999	SDC4	multimodal
NM_003000	SDHB	excluded
NM_003001	SDHC	middle
NM_003009	SELENOW	included
NM_003016	SRSF2	included
NM_003017	SRSF3	excluded
NM_003022	SH3BGRL	multimodal
NM_003079	SMARCE1	excluded
NM_003090	SNRPA1	excluded
NM_003091	SNRPB	included
NM_003093	SNRPC	excluded
NM_003094	SNRPE	excluded
NM_003107	SOX4	excluded
NM_003129	SQLE	excluded
NM_003130	SRI	excluded
NM_003133	SRP9	included
NM_003134	SRP14	excluded
NM_003145	SSR2	included
NM_003168	SUPT4H1	excluded
NM_003172	SURF1	excluded
NM_003187	TAF9	included
NM_003217	TMBIM6	included
NM_003258	TK1	multimodal
NM_003276	TMPO	bimodal
NM_003295	TPT1	excluded
NM_003299	HSP90B1	middle
NM_003311	PHLDA2	excluded
NM_003321	TUFM	excluded
NM_003329	TXN	excluded
NM_003337	UBE2B	excluded
NM_003348	UBE2N	excluded
NM_003352	SUMO1	excluded
NM_003366	UQCRC2	excluded
NM_003374	VDAC1	multimodal
NM_003379	EZR	multimodal
NM_003407	ZFP36	bimodal
NM_003457	ZNF207	excluded
NM_003491	NAA10	excluded
NM_003495	HIST1H4I	bimodal
NM_003516	HIST2H2AA3	bimodal
NM_003610	RAE1	excluded
NM_003641	IFITM1	multimodal
NM_003676	DEGS1	excluded
NM_003689	AKR7A2	multimodal
NM_003731	SSNA1	included
NM_003754	EIF3F	excluded
NM_003756	EIF3H	excluded
NM_003757	EIF3I	middle
NM_003761	VAMP8	multimodal
NM_003776	MRPL40	included
NM_003779	B4GALT3	multimodal
NM_003792	EDF1	included
NM_003795	SNX3	excluded
NM_003801	GPAA1	multimodal
NM_003827	NAPA	multimodal
NM_003860	BANF1	middle
NM_003863	DPM2	multimodal
NM_003897	IER3	multimodal
NM_003915	CPNE1	multimodal
NM_003932	ST13	excluded
NM_003945	ATP6V0E1	excluded
NM_003973	RPL14	excluded
NM_003979	GPRC5A	excluded
NM_004034	ANXA7	excluded
NM_004048	B2M	middle
NM_004074	COX8A	included
NM_004077	CS	middle
NM_004083	DDIT3	multimodal
NM_004092	ECHS1	multimodal
NM_004095	EIF4EBP1	included
NM_004125	DNAJC25-GNG10	excluded
NM_004148	NINJ1	included
NM_004161	RAB1A	excluded
NM_004223	UBE2L6	multimodal
NM_004231	ATP6V1F	included
NM_004252	SLC9A3R1	bimodal
NM_004255	COX5A	excluded
NM_004261	SELENOF	excluded
NM_004280	EEF1E1	excluded
NM_004295	TRAF4	excluded
NM_004322	BAD	multimodal
NM_004331	BNIP3L	excluded
NM_004335	BST2	multimodal
NM_004339	PTTG1IP	included
NM_004343	CALR	multimodal
NM_004373	COX6A1	included
NM_004374	COX6C	excluded
NM_004393	DAG1	excluded
NM_004394	DAP	multimodal
NM_004417	DUSP1	multimodal
NM_004433	ELF3	excluded
NM_004450	ERH	multimodal
NM_004493	HSD17B10	multimodal
NM_004499	HNRNPAB	multimodal
NM_004501	HNRNPU	excluded
NM_004508	IDI1	excluded
NM_004528	MGST3	excluded
NM_004537	NAP1L1	excluded
NM_004542	NDUFA3	excluded
NM_004544	NDUFA10	excluded
NM_004547	NDUFB4	excluded
NM_004549	NDUFC2	excluded
NM_004551	NDUFS3	multimodal
NM_004593	TRA2B	excluded
NM_004607	TBCA	excluded
NM_004637	RAB7A	multimodal
NM_004663	RAB11A	excluded
NM_004691	ATP6V0D1	excluded
NM_004699	FAM50A	excluded
NM_004708	PDCD5	excluded
NM_004710	SYNGR2	included
NM_004712	HGS	multimodal
NM_004713	NEMF	multimodal
NM_004718	COX7A2L	excluded
NM_004800	TM9SF2	excluded
NM_004862	LITAF	excluded
NM_004888	ATP6V1G1	excluded
NM_004905	PRDX6	excluded
NM_004925	AQP3	multimodal
NM_004926	ZFP36L1	excluded
NM_004960	FUS	multimodal
NM_004965	HMGN1	included
NM_005001	NDUFA7	excluded
NM_005002	NDUFA9	excluded
NM_005008	SNU13	excluded
NM_005015	OXA1L	excluded
NM_005022	PFN1	middle
NM_005034	POLR2K	excluded
NM_005101	ISG15	multimodal
NM_005105	RBM8A	excluded
NM_005168	RND3	multimodal
NM_005216	DDOST	excluded
NM_005252	FOS	excluded
NM_005313	PDIA3	excluded
NM_005319	HIST1H1C	multimodal
NM_005324	H3F3B	excluded
NM_005327	HADH	multimodal
NM_005340	HINT1	excluded
NM_005347	HSPA5	excluded
NM_005381	NCL	excluded
NM_005439	MLF2	included
NM_005494	DNAJB6	multimodal
NM_005506	SCARB2	excluded
NM_005507	CFL1	middle
NM_005514	HLA-B	multimodal
NM_005516	HLA-E	excluded
NM_005517	HMGN2	excluded
NM_005524	HES1	multimodal
NM_005556	KRT7	included
NM_005567	LGALS3BP	included
NM_005600	NIT1	multimodal
NM_005614	RHEB	excluded
NM_005620	S100A11	middle
NM_005669	REEP5	excluded
NM_005698	SCAMP3	middle
NM_005720	ARPC1B	multimodal
NM_005721	ACTR3	excluded
NM_005722	ACTR2	excluded
NM_005724	TSPAN3	excluded
NM_005729	PPIF	excluded
NM_005762	TRIM28	excluded
NM_005765	ATP6AP2	multimodal
NM_005776	CNIH1	excluded
NM_005782	ALYREF	multimodal
NM_005787	ALG3	excluded
NM_005789	PSME3	excluded
NM_005796	NUTF2	excluded
NM_005801	EIF1	excluded
NM_005803	FLOT1	excluded
NM_005805	PSMD14	excluded
NM_005809	PRDX2	multimodal
NM_005817	PLIN3	multimodal
NM_005827	SLC35B1	excluded
NM_005837	POP7	multimodal
NM_005849	IGSF6	included
NM_005856	RAMP3	included
NM_005870	SAP18	excluded
NM_005911	MAT2A	included
NM_005953	MT2A	multimodal
NM_005971	FXYD3	excluded
NM_005980	S100P	bimodal
NM_005998	CCT3	included
NM_006003	UQCRFS1	excluded
NM_006012	CLPP	excluded
NM_006013	RPL10	excluded
NM_006014	LAGE3	multimodal
NM_006022	TSC22D1	excluded
NM_006082	TUBA1B	included
NM_006088	TUBB4B	included
NM_006156	NEDD8	included
NM_006164	NFE2L2	excluded
NM_006184	NUCB1	multimodal
NM_006191	PA2G4	excluded
NM_006192	PAX1	bimodal
NM_006223	PIN4	excluded
NM_006234	POLR2J	excluded
NM_006265	RAD21	excluded
NM_006275	SRSF6	multimodal
NM_006304	SEM1	excluded
NM_006327	TIMM23	included
NM_006335	TIMM17A	excluded
NM_006337	MCRS1	multimodal
NM_006339	HMG20B	middle
NM_006349	ZNHIT1	multimodal
NM_006356	ATP5PD	included
NM_006368	CREB3	multimodal
NM_006396	ZNRD2	excluded
NM_006401	ANP32B	excluded
NM_006407	ARL6IP5	excluded
NM_006408	AGR2	excluded
NM_006412	AGPAT2	multimodal
NM_006423	RABAC1	included
NM_006428	MRPL28	excluded
NM_006430	CCT4	excluded
NM_006431	CCT2	middle
NM_006432	NPC2	multimodal
NM_006435	IFITM2	included
NM_006443	DNPH1	multimodal
NM_006471	MYL12A	middle
NM_006476	ATP5MG	excluded
NM_006496	GNAI3	excluded
NM_006519	DYNLT1	included
NM_006579	EBP	included
NM_006597	HSPA8	included
NM_006600	NUDC	excluded
NM_006622	PLK2	multimodal
NM_006636	MTHFD2	excluded
NM_006645	STARD10	multimodal
NM_006694	JTB	excluded
NM_006708	GLO1	multimodal
NM_006713	SUB1	excluded
NM_006743	RBM3	excluded
NM_006761	YWHAE	excluded
NM_006793	PRDX3	excluded
NM_006795	EHD1	excluded
NM_006801	KDELR1	excluded
NM_006808	SEC61B	multimodal
NM_006811	SERINC3	excluded
NM_006815	TMED2	multimodal
NM_006816	LMAN2	multimodal
NM_006826	YWHAQ	middle
NM_006827	TMED10	excluded
NM_006829	ADIRF	excluded
NM_006830	UQCR11	excluded
NM_006833	COPS6	excluded
NM_006854	KDELR2	excluded
NM_006870	DSTN	excluded
NM_006886	ATP5F1E	excluded
NM_006899	IDH3B	included
NM_006907	PYCR1	multimodal
NM_006908	RAC1	excluded
NM_006923	SDF2	excluded
NM_006924	SRSF1	excluded
NM_006925	SRSF5	excluded
NM_006930	SKP1	excluded
NM_006937	SUMO2	excluded
NM_007006	NUDT21	excluded
NM_007033	RER1	excluded
NM_007065	CDC37	middle
NM_007099	ACP1	multimodal
NM_007104	RPL10A	middle
NM_007108	ELOB	excluded
NM_007178	STRAP	excluded
NM_007208	MRPL3	excluded
NM_007236	CHP1	multimodal
NM_007278	GABARAP	excluded
NM_007285	GABARAPL2	included
NM_007364	TMED3	included
NM_007367	RALY	excluded
NM_012203	GRHPR	included
NM_012319	SLC39A6	excluded
NM_012321	LSM4	excluded
NM_012322	LSM5	excluded
NM_012325	MAPRE1	multimodal
NM_012391	SPDEF	bimodal
NM_012394	PFDN2	multimodal
NM_012412	H2AFV	excluded
NM_012433	SF3B1	excluded
NM_012456	TIMM10	multimodal
NM_012458	TIMM13	excluded
NM_012459	TIMM8B	multimodal
NM_012473	TXN2	excluded
NM_013238	DNAJC15	excluded
NM_013258	PYCARD	multimodal
NM_013336	SEC61A1	included
NM_013349	NENF	excluded
NM_013379	DPP7	multimodal
NM_013387	UQCR10	excluded
NM_013442	STOML2	excluded
NM_013995	LAMP2	multimodal
NM_014041	SPCS1	excluded
NM_014046	MRPS18B	multimodal
NM_014047	C19orf53	excluded
NM_014050	MRPL42	excluded
NM_014060	MCTS1	excluded
NM_014077	FAM32A	multimodal
NM_014078	MRPL13	excluded
NM_014106	ZNF770	excluded
NM_014172	PHPT1	included
NM_014175	MRPL15	excluded
NM_014182	ORMDL2	excluded
NM_014187	TMEM208	included
NM_014188	SSU72	multimodal
NM_014206	TMEM258	excluded
NM_014220	TM4SF1	multimodal
NM_014222	NDUFA8	multimodal
NM_014225	PPP2R1A	excluded
NM_014248	RBX1	excluded
NM_014255	CNPY2	excluded
NM_014267	C11orf58	excluded
NM_014313	TMEM50A	excluded
NM_014330	PPP1R15A	included
NM_014335	EID1	excluded
NM_014341	MTCH1	included
NM_014367	FAM162A	excluded
NM_014380	BEX3	included
NM_014394	GHITM	excluded
NM_014399	TSPAN13	multimodal
NM_014402	UQCRQ	excluded
NM_014445	SERP1	excluded
NM_014455	RNF115	excluded
NM_014463	LSM3	excluded
NM_014501	UBE2S	excluded
NM_014604	TAX1BP3	included
NM_014623	MEA1	included
NM_014624	S100A6	included
NM_014713	LAPTM4A	middle
NM_014736	PCLAF	excluded
NM_014740	EIF4A3	excluded
NM_014752	SPCS2	excluded
NM_014765	TOMM20	excluded
NM_015051	ERP44	excluded
NM_015161	ARL6IP1	multimodal
NM_015388	YIPF3	included
NM_015391	ANAPC13	excluded
NM_015392	NPDC1	multimodal
NM_015415	MPC2	excluded
NM_015497	TMEM87A	excluded
NM_015564	LRRTM2	included
NM_015584	POLDIP2	multimodal
NM_015702	MMADHC	excluded
NM_015853	UBXN1	multimodal
NM_015871	ZNF593	multimodal
NM_015920	RPS27L	excluded
NM_015921	CUTA	excluded
NM_015932	POMP	excluded
NM_015933	TMA7	excluded
NM_015949	GET4	excluded
NM_015966	ERGIC3	middle
NM_015971	MRPS7	included
NM_016002	SCCPDH	excluded
NM_016022	APH1A	included
NM_016038	SBDS	multimodal
NM_016039	RTRAF	excluded
NM_016047	SF3B6	multimodal
NM_016061	YPEL5	excluded
NM_016062	CIAO2B	multimodal
NM_016065	MRPS16	excluded
NM_016068	FIS1	excluded
NM_016070	MRPS23	excluded
NM_016079	CHMP3	excluded
NM_016085	ATRAID	included
NM_016100	NAA20	multimodal
NM_016127	SARAF	middle
NM_016131	RAB10	excluded
NM_016145	WDR83OS	multimodal
NM_016199	LSM7	middle
NM_016200	LSM8	excluded
NM_016208	VPS28	included
NM_016219	MAN1B1	multimodal
NM_016237	ANAPC5	excluded
NM_016275	SELENOT	excluded
NM_016283	AK6	excluded
NM_016286	DCXR	middle
NM_016311	ATP5IF1	included
NM_016400	HYPK	excluded
NM_016404	TRMT112	included
NM_016406	UFC1	included
NM_016462	TMEM14C	multimodal
NM_016470	OSER1	excluded
NM_016480	PAIP2	multimodal
NM_016491	MRPL37	multimodal
NM_016494	RNF181	excluded
NM_016497	MRPL51	excluded
NM_016504	MRPL27	included
NM_016520	C9orf78	excluded
NM_016565	COA4	multimodal
NM_016592	GNAS	excluded
NM_016639	TNFRSF12A	middle
NM_016641	GDE1	excluded
NM_016816	OAS1	multimodal
NM_017491	WDR1	multimodal
NM_017510	TMED9	excluded
NM_017528	BUD23	excluded
NM_017670	OTUB1	excluded
NM_017819	TRMT10C	excluded
NM_017823	DUSP23	multimodal
NM_017841	SDHAF2	excluded
NM_017861	PIGX	excluded
NM_017866	TMEM70	excluded
NM_017896	GID8	excluded
NM_017907	LAMTOR1	middle
NM_017914	C19orf24	multimodal
NM_017924	C14orf119	excluded
NM_017971	MRPL20	included
NM_018049	PLEKHJ1	included
NM_018407	LAPTM4B	excluded
NM_018445	SELENOS	multimodal
NM_018453	EAPP	multimodal
NM_018462	BRK1	excluded
NM_018491	CBWD1	excluded
NM_018648	NOP10	included
NM_018670	MESP1	bimodal
NM_018683	RNF114	excluded
NM_018838	NDUFA12	included
NM_018946	NANS	middle
NM_018947	CYCS	excluded
NM_018997	MRPS21	excluded
NM_019026	TMCO1	excluded
NM_019037	EXOSC4	multimodal
NM_019059	TOMM7	included
NM_019107	MYDGF	excluded
NM_019613	WDR45B	multimodal
NM_020154	EMC7	multimodal
NM_020202	NIT2	excluded
NM_020307	CCNL1	excluded
NM_020387	RAB25	multimodal
NM_020529	NFKBIA	included
NM_020531	APMAP	multimodal
NM_020532	RTN4	multimodal
NM_020672	S100A14	included
NM_020791	TAOK1	excluded
NM_020992	PDLIM1	middle
NM_021009	UBC	included
NM_021029	RPL36A	excluded
NM_021034	IFITM3	included
NM_021095	SLC5A6	multimodal
NM_021103	TMSB10	included
NM_021104	RPL41	excluded
NM_021109	TMSB4X	included
NM_021128	POLR2L	excluded
NM_021129	PPA1	included
NM_021130	PPIA	excluded
NM_021173	POLD4	excluded
NM_021177	LSM2	multimodal
NM_021203	SRPRB	excluded
NM_021237	SELENOK	excluded
NM_021243	ABRACL	excluded
NM_021709	SIVA1	included
NM_021960	MCL1	multimodal
NM_021999	ITM2B	excluded
NM_022044	SDF2L1	multimodal
NM_022100	MRPS14	excluded
NM_022121	PERP	excluded
NM_022130	GOLPH3	excluded
NM_022488	ATG3	excluded
NM_022818	MAP1LC3B	excluded
NM_022873	IFI6	multimodal
NM_022877	SMN2	multimodal
NM_023080	C8orf33	excluded
NM_023934	FUNDC2	excluded
NM_023935	DDRGK1	excluded
NM_023936	MRPS34	middle
NM_024026	MRPL57	excluded
NM_024038	TRIR	included
NM_024051	GGCT	multimodal
NM_024071	ZFYVE21	included
NM_024092	TMEM109	multimodal
NM_024112	C9orf16	multimodal
NM_024348	DCTN3	multimodal
NM_024592	SRD5A3	excluded
NM_024613	PLEKHF2	excluded
NM_025124	TMEM134	excluded
NM_025146	NAA50	excluded
NM_030789	HM13	middle
NM_030811	MRPS26	included
NM_030916	NECTIN4	multimodal
NM_030939	C6orf62	middle
NM_030978	ARPC5L	excluded
NM_030981	RAB1B	included
NM_031243	HNRNPA2B1	excluded
NM_031263	HNRNPK	excluded
NM_031286	SH3BGRL3	included
NM_031287	SF3B5	multimodal
NM_031298	EMC6	multimodal
NM_031308	EPPK1	excluded
NM_031314	HNRNPC	excluded
NM_031370	HNRNPD	excluded
NM_031372	HNRNPDL	excluded
NM_031420	MRPL9	multimodal
NM_031452	RAMAC	excluded
NM_031844	HNRNPU	excluded
NM_031903	MRPL32	excluded
NM_031991	PTBP1	multimodal
NM_032014	MRPS24	included
NM_032112	MRPL43	multimodal
NM_032193	RNASEH2C	excluded
NM_032231	CIAO2A	excluded
NM_032272	MAF1	multimodal
NM_032286	MED10	excluded
NM_032302	PSMG3	multimodal
NM_032306	ALKBH7	excluded
NM_032338	LLPH	excluded
NM_032339	MIEN1	excluded
NM_032350	C7orf50	multimodal
NM_032353	VPS25	multimodal
NM_032360	ACBD6	multimodal
NM_032361	THOC3	excluded
NM_032366	METTL26	multimodal
NM_032412	CYSTM1	excluded
NM_032476	MRPS6	included
NM_032477	MRPL41	included
NM_032479	MRPL36	included
NM_032574	DPY30	multimodal
NM_032656	DHX37	included
NM_032667	BSCL2	excluded
NM_032731	TXNDC17	excluded
NM_032773	LRCH3	included
NM_032901	COX14	included
NM_032906	PYURF	included
NM_032989	BAD	multimodal
NM_033318	SMDT1	excluded
NM_033362	MRPS12	excluded
NM_033363	MRPS12	bimodal
NM_033504	TMEM54	included
NM_033546	MYL12B	excluded
NM_033630	SCAND1	multimodal
NM_033643	RPL36	excluded
NM_033668	ITGB1	multimodal
NM_044472	CDC42	included
NM_052844	WDR34	multimodal
NM_052850	GADD45GIP1	excluded
NM_052886	MAL2	excluded
NM_052951	DNTTIP1	multimodal
NM_053050	MRPL53	included
NM_053056	CCND1	excluded
NM_053275	RPLP0	included
NM_054014	FKBP1A	included
NM_054016	SRSF10	excluded
NM_080593	HIST1H2BK	included
NM_080626	BRI3BP	included
NM_080648	APEX1	included
NM_080652	TMEM41A	excluded
NM_080821	FAM210B	excluded
NM_130786	A1BG	excluded
NM_133639	RHOV	multimodal
NM_134265	WSB1	excluded
NM_138288	SPTSSA	excluded
NM_138446	MALSU1	excluded
NM_138610	H2AFY	bimodal
NM_138689	PPP1R14B	multimodal
NM_138764	BAX	excluded
NM_138820	HIGD2A	included
NM_138924	GAMT	multimodal
NM_139062	CSNK1D	excluded
NM_139323	YWHAB	excluded
NM_144578	MAPK1IP1L	excluded
NM_144772	NAXE	excluded
NM_145169	SFT2D1	excluded
NM_145252	ZG16B	multimodal
NM_145330	MRPL33	multimodal
NM_145729	MRPL24	multimodal
NM_145792	MGST1	excluded
NM_148912	ABHD11	multimodal
NM_148919	PSMB8	multimodal
NM_148976	PSMA1	middle
NM_152285	ARRDC1	multimodal
NM_152685	SLC23A1	included
NM_152766	TMEM256	multimodal
NM_152862	ARPC2	excluded
NM_153001	PSMC4	excluded
NM_153200	EDF1	included
NM_153201	HSPA8	included
NM_153280	UBA1	multimodal
NM_153373	PHYKPL	multimodal
NM_153824	PYCR1	included
NM_170679	SKP1	excluded
NM_170708	LMNA	excluded
NM_170739	MRPL11	excluded
NM_172251	MRPL54	multimodal
NM_173614	NOMO2	multimodal
NM_174886	TGIF1	excluded
NM_174909	TMEM167A	excluded
NM_175732	PTPMT1	excluded
NM_175932	PSMD13	included
NM_176783	PSME1	included
NM_177534	SULT1A1	excluded
NM_177542	SNRPD2	included
NM_177543	PLPP2	included
NM_177552	SULT1A3	excluded
NM_177925	H2AFJ	included
NM_177983	PPM1G	multimodal
NM_178190	ATP5IF1	included
NM_178191	ATP5IF1	included
NM_178578	PSMF1	excluded
NM_178582	HM13	included
NM_180982	MRPL52	excluded
NM_181462	MRPL55	multimodal
NM_181466	EIF6	included
NM_181468	EIF6	included
NM_181528	NAA20	multimodal
NM_181652	PRDX5	multimodal
NM_181800	UBE2C	multimodal
NM_181836	TMED7	excluded
NM_181843	NUDT8	multimodal
NM_182649	PCNA	excluded
NM_182685	EFNA1	bimodal
NM_182776	MCM7	multimodal
NM_182810	ATF4	included
NM_182917	EIF4G1	excluded
NM_183057	VPS28	included
NM_183237	RNF7	excluded
NM_183241	PAXX	multimodal
NM_183425	RBM38	multimodal
NM_184043	ALDOA	included
NM_194261	UBE2I	excluded
NM_194326	RPS19BP1	multimodal
NM_194434	VAPA	excluded
NM_197955	C15orf48	excluded
NM_197966	BID	excluded
NM_198057	TSC22D3	included
NM_198175	NME1	excluded
NM_198242	EIF4G1	excluded
NM_198426	CHMP2A	multimodal
NM_198536	TMEM205	included
NM_198590	BSG	included
NM_198591	BSG	included
NM_198883	MTX1	multimodal
NM_198976	NELFCD	multimodal
NM_199074	NDUFAF3	excluded
NM_199184	DNPH1	included
NM_201384	PLEC	excluded
NM_201397	GPX1	multimodal
NM_201429	RTN3	middle
NM_203298	CHCHD1	excluded
NM_203401	STMN1	excluded
NM_203458	NOTCH2NLA	excluded
NM_203464	AK4	excluded
NM_206917	BEX3	excluded
NM_206918	DEGS2	excluded
NM_207047	ENSA	multimodal
NM_207168	ENSA	included
NM_212460	ARL4A	excluded
NM_212552	BOLA3	excluded
NM_213725	RPLP1	excluded
NR_001317	HCG4B	included
NR_001434	HLA-H	included
NR_001445	RN7SK	multimodal
NR_002201	FTH1P3	multimodal
NR_002308	UQCRBP1	multimodal
NR_002315	H3F3AP4	excluded
NR_002453	SMG1P5	multimodal
NR_002454	LOC606724	included
NR_002556	LOC388242	multimodal
NR_002594	SLC7A5P2	included
NR_002715	RN7SL1	multimodal
NR_002985	SNORA58	bimodal
NR_002988	SNORA74B	included
NR_003010	SCARNA12	included
NR_003015	SNORA53	included
NR_003189	SYS1-DBNDD2	multimodal
NR_003225	LGALS3	excluded
NR_003573	ANXA2P2	included
NR_003605	ZFAS1	excluded
NR_023358	SCARNA9L	included
NR_024206	CYTOR	multimodal
NR_024373	MIR4435-2HG	multimodal
NR_024454	NDUFB2-AS1	excluded
NR_024456	LOC100190986	multimodal
NR_024629	IDI2-AS1	included
NR_026712	RPL13AP5	included
NR_027155	SMG1P3	multimodal
NR_027168	SNHG29	multimodal
NR_027260	RN7SL2	multimodal
NR_027406	LOC100129034	included
NR_027418	LINC00674	excluded
NR_027645	ATP1A1-AS1	multimodal
NR_028052	NGRN	included
NR_028323	SLC5A6	multimodal
NR_028370	PCNA-AS1	multimodal
NR_028443	SLC25A5-AS1	excluded
NR_028510	TYRO3P	bimodal
NR_029378	LOC100289511	excluded
NR_029426	SMA4	multimodal
NR_029434	PSMA3-AS1	included
NR_031762	HCP5B	included
NR_033343	PSCA	excluded
NR_034041	SRSF1	excluded
NR_034106	CRNDE	excluded
NR_037600	LINC01578	excluded
NR_037608	SLX1A-SULT1A3	excluded
NR_037609	SLX1B-SULT1A4	multimodal
NR_037673	SERF2-C15ORF63	excluded
NR_037688	ACTG1	middle
NR_037717	RNASEK-C17orf49	multimodal
NR_037926	SENP3-EIF4A1	excluded
NR_037928	P2RX5-TAX1BP3	included
NR_037969	SRD5A3-AS1	bimodal
NR_038111	SNHG16	excluded
NR_038193	METTL23	multimodal
NR_038286	PSMD6-AS2	bimodal
NR_038322	MAP3K13	excluded
NR_038410	TSPOAP1-AS1	excluded
NR_038894	CBR3-AS1	included
NR_040049	SDCBP2-AS1	included
NR_045586	SRA1	excluded
NR_046413	POLD4	excluded
NR_046633	NUCB1-AS1	included
NR_046853	HM13-AS1	included
NR_049759	IFITM3	included
NR_051984	PRC1-AS1	bimodal
NR_073084	CRIP2	middle
NR_073412	TMEM134	multimodal
NR_073609	PDCD6	included
NR_077246	RPS14P3	multimodal
NR_102318	ACTR3	excluded
NR_102400	PYCARD-AS1	excluded
NR_102427	CIB1	included
NR_103560	GSN-AS1	multimodal
NR_103819	SNRPD3	excluded
NR_104029	DGUOK-AS1	included
NR_104165	MDH2	included
NR_104454	TMEM14B	multimodal
NR_109828	PCBP2-OT1	included
NR_109875	LOC101927100	included
NR_109878	LINC01726	bimodal
NR_110009	ADNP-AS1	included
NR_110044	LOC101926943	multimodal
NR_110578	CSNK1D	excluded
NR_110730	PTOV1-AS2	bimodal
NR_120608	TUBB	multimodal
NR_130143	LOC104968399	included
NR_132776	SNORA94	bimodal
NR_133645	S100A16	included
NR_134538	C7orf50	bimodal
NR_134671	TRAPPC2L	excluded
NR_134848	GAA	included
NR_134869	HEXA	included
NR_135305	SMG1P2	middle
NR_135587	DPY30	middle
NR_136278	LOC105375713	included
NR_136587	RBM39	included
NR_138060	ARL16	multimodal
NR_144447	ZNF8-ERVK3-1	bimodal
NR_144567	MALAT1	included
NR_145425	RUSC1-AS1	included
NR_145721	SNORA74C-1	included
NR_145819	RNA45SN1	excluded
NR_145820	RNA18SN1	included
NR_145822	RNA28SN1	multimodal
NR_146063	SMIM27	included
NR_146144	RNA45SN2	excluded
NR_146146	RNA18SN2	middle
NR_146148	RNA28SN2	multimodal
NR_146151	RNA45SN3	excluded
NR_146152	RNA18SN3	middle
NR_146154	RNA28SN3	multimodal
NR_146274	KRT7-AS	included
NR_146472	ELF3-AS1	bimodal
NR_146967	C7orf50	multimodal
NR_147233	TPM1-AS	multimodal
NR_148712	ENOSF1	bimodal
NR_155756	TBCB	excluded
NR_157088	CLTB	multimodal
NR_157580	LOC440292	excluded
NR_158216	LOC105370687	excluded
NR_160308	GCNT7	bimodal
NR_160400	TIMM8B	multimodal
NR_160950	SNHG32	excluded
NR_163478	NA	excluded
NR_163943	NA	excluded
NR_171558	NA	multimodal
NR_171559	NA	multimodal
NR_171562	NA	multimodal

## Sheet: SRP133387_SingleCTCs
APA_ID	Gene_Symbol	Modality
NM_000050	ASS1	excluded
NM_000099	CST3	middle
NM_000100	CSTB	included
NM_000101	CYBA	excluded
NM_000146	FTL	included
NM_000269	NME1	excluded
NM_000270	PNP	multimodal
NM_000291	PGK1	excluded
NM_000294	PHKG2	multimodal
NM_000310	PPT1	middle
NM_000365	TPI1	middle
NM_000454	SOD1	excluded
NM_000485	APRT	excluded
NM_000507	FBP1	multimodal
NM_000574	CD55	excluded
NM_000581	GPX1	multimodal
NM_000700	ANXA1	excluded
NM_000701	ATP1A1	excluded
NM_000712	BLVRA	multimodal
NM_000713	BLVRB	middle
NM_000714	TSPO	included
NM_000754	COMT	excluded
NM_000801	FKBP1A	middle
NM_000852	GSTP1	excluded
NM_000903	NQO1	excluded
NM_000918	P4HB	included
NM_000943	PPIC	excluded
NM_000968	RPL4	excluded
NM_000971	RPL7	excluded
NM_000975	RPL11	excluded
NM_000977	RPL13	excluded
NM_000978	RPL23	excluded
NM_000981	RPL19	middle
NM_000983	RPL22	excluded
NM_000984	RPL23A	excluded
NM_000990	RPL27A	excluded
NM_000991	RPL28	excluded
NM_000992	RPL29	middle
NM_000993	RPL31	excluded
NM_000994	RPL32	excluded
NM_000996	RPL35A	excluded
NM_000997	RPL37	excluded
NM_000998	RPL37A	excluded
NM_001000	RPL39	included
NM_001001	RPL36AL	excluded
NM_001001392	CD44	excluded
NM_001001503	NDUFV3	excluded
NM_001001701	C4orf3	excluded
NM_001002027	ATP5MC1	included
NM_001002033	JPT1	multimodal
NM_001002248	ANAPC11	included
NM_001002258	ATP5MC3	excluded
NM_001002858	ANXA2	excluded
NM_001004333	RNASEK	included
NM_001005354	PRR13	multimodal
NM_001005474	NFKBIZ	excluded
NM_001005781	SUMO1	excluded
NM_001006941	ALG3	excluded
NM_001007	RPS4X	excluded
NM_001007070	SDCBP	multimodal
NM_001007074	RPL32	excluded
NM_001007214	CACYBP	excluded
NM_001007565	TFG	middle
NM_001008709	PPP1CA	included
NM_001009184	GRINA	excluded
NM_001009186	CCT6A	excluded
NM_001009570	CCT7	included
NM_001010	RPS6	excluded
NM_001010858	RNF187	excluded
NM_001010974	BCAS4	multimodal
NM_001010989	HERPUD1	excluded
NM_001011537	FYTTD1	multimodal
NM_001012	RPS8	excluded
NM_001012270	BIRC5	excluded
NM_001012300	MCRS1	multimodal
NM_001012664	SLC3A2	included
NM_001013653	LRRC26	excluded
NM_001014763	ETFB	excluded
NM_001014990	MRPL22	excluded
NM_001017390	SULT1A4	multimodal
NM_001017963	HSP90AA1	excluded
NM_001017998	GNG10	excluded
NM_001018004	TPM1	bimodal
NM_001018067	SERBP1	excluded
NM_001018136	NME1-NME2	included
NM_001018837	HAX1	included
NM_001019	RPS15A	excluded
NM_001022	RPS19	excluded
NM_001023	RPS20	middle
NM_001024212	S100A13	multimodal
NM_001024844	CD82	excluded
NM_001024957	BRMS1	multimodal
NM_001024960	ARPC4	included
NM_001025	RPS23	excluded
NM_001025071	RPS14	excluded
NM_001025205	AP2M1	included
NM_001029	RPS26	excluded
NM_001030018	APRT	included
NM_001030287	ATF3	included
NM_001031	RPS28	excluded
NM_001031677	RAB24	excluded
NM_001031684	SRSF7	excluded
NM_001031711	ERGIC1	multimodal
NM_001032409	OAS1	multimodal
NM_001033056	GLUL	excluded
NM_001033503	SAR1B	excluded
NM_001034	RRM2	excluded
NM_001034025	ERP29	excluded
NM_001035005	C18orf32	excluded
NM_001035513	SDHC	excluded
NM_001037164	ARL4A	excluded
NM_001037494	DYNLL1	middle
NM_001037811	HSD17B10	multimodal
NM_001039457	ATP6V0B	included
NM_001039490	CD151	excluded
NM_001039577	CCNL2	multimodal
NM_001039712	DEDD	multimodal
NM_001040431	COA3	multimodal
NM_001040619	ATF3	multimodal
NM_001040649	ACP1	multimodal
NM_001040874	HIST2H2AA4	included
NM_001042432	CLN3	multimodal
NM_001042462	TRAPPC5	excluded
NM_001042465	PSAP	included
NM_001042472	ABHD12	excluded
NM_001042483	NUPR1	excluded
NM_001042679	RHOC	included
NM_001043352	TPM3	excluded
NM_001048249	SMIM15	excluded
NM_001069	TUBB2A	multimodal
NM_001070	TUBG1	included
NM_001077399	PNKD	included
NM_001077628	APH1A	included
NM_001078166	SRSF1	excluded
NM_001079862	DBI	included
NM_001085365	MZT2A	multimodal
NM_001085372	UQCC3	excluded
NM_001086521	NDUFAF8	multimodal
NM_001089591	UQCRHL	excluded
NM_001098208	HNRNPF	excluded
NM_001098398	COPA	excluded
NM_001098616	C1orf43	included
NM_001098673	ATG101	multimodal
NM_001098786	HILPDA	middle
NM_001099406	SLC39A6	multimodal
NM_001099639	ZNF146	excluded
NM_001099645	RPL22L1	excluded
NM_001099668	HIGD1A	excluded
NM_001099693	RPL31	middle
NM_001101	ACTB	middle
NM_001102667	PSMA4	multimodal
NM_001102668	PSMA4	excluded
NM_001105204	RUSC1	multimodal
NM_001105205	RUSC1	multimodal
NM_001110503	TMEM87A	multimodal
NM_001113205	TSTD1	included
NM_001122955	BSCL2	multimodal
NM_001123355	PPP6C	excluded
NM_001123377	PARK7	excluded
NM_001126051	HDGF	multimodal
NM_001127192	CNBP	excluded
NM_001127198	TMC6	excluded
NM_001127213	LY6E	multimodal
NM_001127223	CD59	excluded
NM_001127393	ATP5MPL	excluded
NM_001127394	TSEN15	multimodal
NM_001127889	SPG21	multimodal
NM_001128203	PLAAT3	excluded
NM_001128914	PCBP2	multimodal
NM_001130004	ACTN1	excluded
NM_001130674	CALU	excluded
NM_001130678	EIF4E	excluded
NM_001130689	HMGB2	excluded
NM_001130725	PSMB5	included
NM_001130929	STMP1	excluded
NM_001134321	RTL8A	multimodal
NM_001134484	TOMM5	multimodal
NM_001134493	TOMM6	middle
NM_001135239	LDHA	excluded
NM_001135255	RBBP4	included
NM_001135592	RPS27A	excluded
NM_001135694	VDAC3	multimodal
NM_001135702	YWHAZ	excluded
NM_001135998	NDUFB11	included
NM_001136008	FXYD3	included
NM_001136010	FXYD3	included
NM_001136016	APP	middle
NM_001136017	CCND3	multimodal
NM_001136134	RPL28	excluded
NM_001136136	RPL28	included
NM_001136137	RPL28	included
NM_001136232	SEC13	included
NM_001136268	DAZAP2	middle
NM_001136275	AKIRIN1	excluded
NM_001136497	BTF3L4	excluded
NM_001136498	CISD3	excluded
NM_001137553	LRRFIP1	excluded
NM_001139457	BCAP31	multimodal
NM_001142298	SQSTM1	included
NM_001142418	MORF4L2	included
NM_001142625	RAB34	multimodal
NM_001142627	SEC61A2	multimodal
NM_001142648	SAR1A	excluded
NM_001142798	C17orf49	multimodal
NM_001142799	C17orf49	multimodal
NM_001143681	GSTK1	multimodal
NM_001143760	EIF5A	middle
NM_001143780	SLC25A39	middle
NM_001143841	TMEM106C	multimodal
NM_001143937	PSMA1	included
NM_001143985	BANF1	middle
NM_001144831	PHB2	included
NM_001144932	PSMB5	included
NM_001144943	RAB34	multimodal
NM_001144944	MYL12B	excluded
NM_001145145	SLC1A5	middle
NM_001145155	NR2F2	excluded
NM_001145156	NR2F2	excluded
NM_001145160	TPM4	multimodal
NM_001145355	CBWD1	excluded
NM_001145410	NONO	multimodal
NM_001145412	NFE2L2	excluded
NM_001145713	SAE1	excluded
NM_001145940	PAFAH1B3	included
NM_001146068	CAPN2	included
NM_001146178	IP6K2	multimodal
NM_001146191	MPZL1	excluded
NM_001146333	SUMF2	included
NM_001151	SLC25A4	excluded
NM_001152	SLC25A5	middle
NM_001154	ANXA5	excluded
NM_001159287	TPI1	middle
NM_001162407	CLK1	excluded
NM_001163424	COPS9	multimodal
NM_001164189	PLIN3	excluded
NM_001165415	LDHA	excluded
NM_001165931	RRM2	excluded
NM_001166103	SPINT2	excluded
NM_001166237	GSDMD	multimodal
NM_001168331	NDUFB4	included
NM_001170406	CDK1	multimodal
NM_001170634	FUS	excluded
NM_001170795	ATRAID	included
NM_001171508	MCFD2	excluded
NM_001171511	MCFD2	excluded
NM_001172415	BAG1	excluded
NM_001172695	TSFM	excluded
NM_001172705	EIF4G2	included
NM_001173128	YTHDF2	excluded
NM_001177	ARL1	excluded
NM_001177643	DAG1	excluded
NM_001178087	SERF1B	multimodal
NM_001183	ATP6AP1	included
NM_001184722	GPI	multimodal
NM_001184730	PIGT	multimodal
NM_001184740	CTTN	multimodal
NM_001184761	CLTA	included
NM_001184823	VDAC2	excluded
NM_001184891	FLAD1	multimodal
NM_001184979	NDUFS5	included
NM_001185	AZGP1	multimodal
NM_001185012	NDUFA2	multimodal
NM_001185077	ARHGDIA	multimodal
NM_001185092	NIT1	multimodal
NM_001190329	ATP5MC3	excluded
NM_001190452	MTRNR2L1	excluded
NM_001190470	MTRNR2L2	excluded
NM_001190472	MTRNR2L3	multimodal
NM_001190702	MTRNR2L8	excluded
NM_001190706	MTRNR2L9	excluded
NM_001190864	MRPS35	excluded
NM_001190991	CNPY2	included
NM_001190996	ARPC1A	multimodal
NM_001191003	GSTO1	excluded
NM_001193557	ENY2	excluded
NM_001193572	CSRP1	included
NM_001193655	CYBC1	excluded
NM_001195056	DDIT3	multimodal
NM_001195427	SRSF2	included
NM_001195478	TFG	middle
NM_001195536	CHMP5	excluded
NM_001197139	DBNDD2	included
NM_001198569	ATP6V0C	excluded
NM_001198719	RBBP7	excluded
NM_001198846	RBM14-RBM4	included
NM_001198868	CAPN1	multimodal
NM_001199038	SERINC2	excluded
NM_001199142	EIF3C	excluded
NM_001199355	RPL17-C18orf32	excluded
NM_001199535	TGIF2-RAB5IF	included
NM_001199780	PSMB2	excluded
NM_001199786	FKBP1A	middle
NM_001199851	DAP3	excluded
NM_001199876	SERF2	excluded
NM_001199877	SERF2	excluded
NM_001199954	ACTG1	included
NM_001199957	NDUFB5	excluded
NM_001199975	UQCRB	excluded
NM_001201483	ENO1	included
NM_001202547	SYNJ2BP-COX16	excluded
NM_001204054	NDUFC2	excluded
NM_001204064	CHURC1	excluded
NM_001204082	MICOS10	excluded
NM_001204193	SRP19	excluded
NM_001204196	SRP19	excluded
NM_001204199	SRP19	included
NM_001204861	ELOC	excluded
NM_001206486	ATF3	multimodal
NM_001206799	PKM	included
NM_001206836	RAB11A	excluded
NM_001207000	HNRNPDL	excluded
NM_001212	C1QBP	included
NM_001220777	CDKN1A	multimodal
NM_001236	CBR3	multimodal
NM_001242375	ANAPC13	multimodal
NM_001242598	TMEM147	multimodal
NM_001242831	ELOVL5	included
NM_001242839	GUK1	included
NM_001242840	GUK1	included
NM_001242854	ARFIP2	multimodal
NM_001242891	CSDE1	excluded
NM_001242918	ZFAND6	multimodal
NM_001243131	RPL13	excluded
NM_001243252	EFHD1	multimodal
NM_001243646	CD2BP2	excluded
NM_001243719	RAB6A	multimodal
NM_001243799	TSC22D1	excluded
NM_001243885	TOB1	excluded
NM_001243892	TPD52L2	multimodal
NM_001244572	BID	excluded
NM_001244644	CHMP2B	excluded
NM_001244701	ZFP36L1	excluded
NM_001244812	FOXP1	excluded
NM_001251918	RAP1B	excluded
NM_001252053	PCMT1	included
NM_001252273	DIPK1A	included
NM_001253379	RPL15	excluded
NM_001253764	SRA1	excluded
NM_001253790	SMIM22	excluded
NM_001253816	SLC52A2	multimodal
NM_001254738	RND3	multimodal
NM_001256165	TMCO1	excluded
NM_001256281	RAB34	multimodal
NM_001256302	ETF1	excluded
NM_001256355	UBE2L3	excluded
NM_001256399	ELOVL1	multimodal
NM_001256534	SLC25A1	multimodal
NM_001256580	RPL10	excluded
NM_001256721	CCT4	excluded
NM_001256829	TMEM265	excluded
NM_001256879	POLD2	multimodal
NM_001256891	SRI	multimodal
NM_001257096	PAX1	bimodal
NM_001257335	ATP5F1A	excluded
NM_001257401	CD63	excluded
NM_001258028	TKT	excluded
NM_001258289	SELENBP1	multimodal
NM_001258320	TP53I11	multimodal
NM_001258384	IDH3B	included
NM_001258423	SMS	excluded
NM_001260506	RPS3	excluded
NM_001260507	RPS3	excluded
NM_001261400	PSMD9	excluded
NM_001261401	TSN	excluded
NM_001261466	ADAM15	included
NM_001265591	RTN3	middle
NM_001265603	MORF4L1	excluded
NM_001267061	SNX17	multimodal
NM_001267558	PDCD6	middle
NM_001267699	RPS3A	included
NM_001267700	PHB2	included
NM_001267708	ZNF706	excluded
NM_001267809	ILF2	excluded
NM_001267817	OSTC	excluded
NM_001270399	TUBA1A	multimodal
NM_001270439	ARPC5	excluded
NM_001270447	ACADVL	included
NM_001270481	PSMB6	included
NM_001270482	PSMD11	excluded
NM_001270491	RPL13A	excluded
NM_001270550	MDK	excluded
NM_001270552	MDK	excluded
NM_001270837	CRIP2	middle
NM_001270896	TRAPPC3	excluded
NM_001270987	LTBR	multimodal
NM_001271213	SQOR	multimodal
NM_001271641	MTCH1	included
NM_001271734	COPZ1	multimodal
NM_001271742	CSNK1A1	excluded
NM_001271849	CDK2AP2	multimodal
NM_001271878	KHDRBS1	excluded
NM_001271918	SEC11A	middle
NM_001271957	SLC39A1	multimodal
NM_001271970	HSP90AB1	included
NM_001271998	RAB4A	excluded
NM_001272007	ISCA2	excluded
NM_001272038	RAB13	multimodal
NM_001272053	MRFAP1	included
NM_001272083	SHISA5	multimodal
NM_001277199	CNIH4	excluded
NM_001277224	TAGLN2	included
NM_001277764	CIB1	excluded
NM_001278191	TPM3	excluded
NM_001278197	CDK5RAP3	multimodal
NM_001278243	ZFAND5	excluded
NM_001278244	ZFAND5	excluded
NM_001278263	CARHSP1	excluded
NM_001278265	CARHSP1	excluded
NM_001278346	PHYKPL	multimodal
NM_001278379	ARL6IP4	multimodal
NM_001278555	UBE2E3	multimodal
NM_001278556	ARPC3	excluded
NM_001278645	NDUFB9	middle
NM_001278656	SNRPD3	excluded
NM_001278700	POLR2H	multimodal
NM_001278712	ATG3	multimodal
NM_001278946	SEC13	included
NM_001279360	LYPLA1	excluded
NM_001280	CIRBP	included
NM_001280557	SLC39A4	multimodal
NM_001280789	SURF4	multimodal
NM_001280790	SURF4	multimodal
NM_001281297	EDF1	included
NM_001281427	DCTN3	multimodal
NM_001281434	ZNHIT3	multimodal
NM_001281437	ADRM1	multimodal
NM_001281447	GTF2IRD2	multimodal
NM_001281474	MLPH	excluded
NM_001281496	PHB	excluded
NM_001281497	PHB	excluded
NM_001281512	HADHB	multimodal
NM_001281529	PSME1	included
NM_001281532	PSENEN	excluded
NM_001281716	UBB	included
NM_001281719	UBB	included
NM_001282150	VPS29	excluded
NM_001282161	UBE2A	excluded
NM_001282162	CAPZB	excluded
NM_001282205	SIGMAR1	excluded
NM_001282234	PSMA6	included
NM_001282385	CSNK2B	multimodal
NM_001282404	MDH2	excluded
NM_001282576	UBE2V1	multimodal
NM_001282580	UBE2V1	multimodal
NM_001282604	PTGES3	middle
NM_001282606	TMBIM4	excluded
NM_001282621	PGRMC1	multimodal
NM_001282625	LMNA	included
NM_001282652	STIP1	multimodal
NM_001282674	BEX3	middle
NM_001283037	RTF2	excluded
NM_001284239	SARAF	multimodal
NM_001284367	NDUFB8	included
NM_001284368	NDUFB8	multimodal
NM_001284502	NUBP2	multimodal
NM_001285450	PDXDC1	multimodal
NM_001286056	CNN3	excluded
NM_001286084	TRMT112	included
NM_001286086	C11orf98	multimodal
NM_001286110	CLN3	excluded
NM_001286272	TPT1	excluded
NM_001286416	SUMO3	middle
NM_001286435	NME4	multimodal
NM_001286436	NME4	multimodal
NM_001286487	TMEM87A	excluded
NM_001286706	UFM1	excluded
NM_001286773	OCIAD2	excluded
NM_001286789	CBR1	multimodal
NM_001286836	CBWD5	multimodal
NM_001287032	STOML2	excluded
NM_001287392	COMMD6	excluded
NM_001287434	CCND3	multimodal
NM_001287588	SLC50A1	middle
NM_001287592	SLC50A1	middle
NM_001287744	FDFT1	excluded
NM_001287747	FDFT1	excluded
NM_001288	CLIC1	middle
NM_001288565	TMEM9	middle
NM_001288610	JPT1	multimodal
NM_001288659	METTL9	multimodal
NM_001288660	METTL9	multimodal
NM_001288756	BABAM1	excluded
NM_001288978	XRCC6	included
NM_001289414	ANAPC11	excluded
NM_001289797	PCBD1	multimodal
NM_001289910	IDH2	included
NM_001290135	EI24	excluded
NM_001290193	MYADM	excluded
NM_001290309	CTNNA1	middle
NM_001290553	ADIPOR1	excluded
NM_001290557	ADIPOR1	excluded
NM_001291304	NDUFA5	excluded
NM_001291428	BAX	excluded
NM_001291430	BAX	multimodal
NM_001291431	BAX	excluded
NM_001291739	CD24	excluded
NM_001291916	SNRPD1	excluded
NM_001293179	PRSS23	excluded
NM_001293180	PRSS23	excluded
NM_001293213	TUBB	excluded
NM_001293214	TUBB	excluded
NM_001294332	SDHA	excluded
NM_001294333	ATP6V0B	included
NM_001297418	HNRNPM	multimodal
NM_001297566	UQCRH	included
NM_001297723	C1orf43	included
NM_001297738	TBCA	included
NM_001300	KLF6	excluded
NM_001300795	UBE2D3	excluded
NM_001300796	RAN	excluded
NM_001300829	CIRBP	excluded
NM_001300888	PBDC1	excluded
NM_001300900	MRPS34	multimodal
NM_001300901	TCEAL4	excluded
NM_001300902	CD55	multimodal
NM_001300914	DNAJB1	included
NM_001301020	OAZ1	excluded
NM_001301068	ARL1	excluded
NM_001301076	AP2S1	included
NM_001301241	ARHGDIA	multimodal
NM_001301242	ARHGDIA	multimodal
NM_001301834	C12orf57	included
NM_001301836	C12orf57	included
NM_001302545	AAMP	excluded
NM_001303007	DDAH2	multimodal
NM_001303048	MYL12A	middle
NM_001303060	TMED4	included
NM_001303062	TMED4	middle
NM_001303114	TUBA1C	multimodal
NM_001303117	TUBA1C	excluded
NM_001303235	ISG20	excluded
NM_001303247	WDR61	excluded
NM_001303499	CNN2	multimodal
NM_001303507	PPP4C	multimodal
NM_001304451	PGD	excluded
NM_001305	CLDN4	included
NM_001305043	TMEM59	excluded
NM_001305066	TMEM59	included
NM_001305626	CALM2	middle
NM_001305841	TCEAL4	excluded
NM_001306	CLDN3	excluded
NM_001306153	CCT5	excluded
NM_001306154	CCT5	excluded
NM_001307	CLDN7	excluded
NM_001308036	NCBP2	multimodal
NM_001308043	CFLAR	multimodal
NM_001308205	SSR3	excluded
NM_001308396	MRPL43	bimodal
NM_001308824	SF3B1	included
NM_001309861	GNAS	excluded
NM_001309883	GNAS	included
NM_001310315	TUBB2A	multimodal
NM_001310326	UBE2T	excluded
NM_001311	CRIP1	excluded
NM_001311203	CLTA	included
NM_001311311	VKORC1	included
NM_001312653	HIST1H2BK	included
NM_001313858	ARL6IP1	middle
NM_001313893	HMGB1	excluded
NM_001313932	CAPZB	included
NM_001313941	RHOA	middle
NM_001313993	IGFBP2	excluded
NM_001314039	DNAJA1	excluded
NM_001316374	MDH1	multimodal
NM_001317007	S100A16	included
NM_001317008	S100A16	included
NM_001317111	MOB1A	excluded
NM_001317167	SNRPG	excluded
NM_001317231	MTCH2	excluded
NM_001317783	TSTA3	included
NM_001317856	EIF3CL	excluded
NM_001317897	SMIM14	excluded
NM_001317956	IDI1	excluded
NM_001317968	ARRDC1	included
NM_001317981	RPL26L1	excluded
NM_001318015	ZDHHC12	multimodal
NM_001318016	ZDHHC12	included
NM_001318020	ZDHHC12	multimodal
NM_001318051	NDUFS4	excluded
NM_001318058	DMAC1	excluded
NM_001318188	HNRNPK	excluded
NM_001318236	LAMTOR4	included
NM_001318237	LAMTOR4	included
NM_001318252	C7orf50	multimodal
NM_001318485	MRPL20	included
NM_001318494	TRAPPC4	excluded
NM_001318526	TRAPPC2L	excluded
NM_001318527	TRAPPC2L	excluded
NM_001318770	MRPL14	excluded
NM_001318788	COX4I1	included
NM_001318794	COX4I1	included
NM_001318797	COX4I1	excluded
NM_001318825	HEXA	excluded
NM_001318848	CNPY3	multimodal
NM_001318863	DGUOK	multimodal
NM_001318942	MEA1	included
NM_001319036	COX7A2L	multimodal
NM_001319040	COX7A2L	multimodal
NM_001319068	ITGB1BP1	excluded
NM_001319081	HMGA1	excluded
NM_001319086	RUVBL1	included
NM_001319137	CTSH	excluded
NM_001319140	AK2	excluded
NM_001319157	DYNLRB1	included
NM_001319184	RNPEP	multimodal
NM_001319188	HDGF	multimodal
NM_001319236	RPL34	excluded
NM_001319991	SUPT5H	multimodal
NM_001320194	NACA	included
NM_001320327	CHCHD2	included
NM_001320397	PCNP	excluded
NM_001320523	SYNGR2	middle
NM_001320597	DDX5	excluded
NM_001320628	BOLA2-SMG1P6	multimodal
NM_001320651	U2AF1L5	multimodal
NM_001320778	SCAMP2	multimodal
NM_001320904	DTYMK	multimodal
NM_001320913	FXYD5	excluded
NM_001320929	GTF2A2	excluded
NM_001320979	AKR7A2	excluded
NM_001321017	UBA52	excluded
NM_001321021	UBA52	excluded
NM_001321170	TECR	middle
NM_001321185	TMC6	multimodal
NM_001321335	SELENOH	excluded
NM_001321367	CD99	included
NM_001321369	CD99	excluded
NM_001321421	ARHGDIB	multimodal
NM_001321423	ARHGDIB	multimodal
NM_001321441	AHSA1	multimodal
NM_001321648	NUDT5	excluded
NM_001321688	BZW1	excluded
NM_001321690	BZW1	multimodal
NM_001321704	RPS9	middle
NM_001321845	COMMD4	multimodal
NM_001321970	MRPS11	excluded
NM_001321973	MRPS11	multimodal
NM_001321974	MRPS11	multimodal
NM_001322033	ACTN4	middle
NM_001322086	AHCY	multimodal
NM_001322959	TMEM183A	excluded
NM_001322970	OAT	excluded
NM_001323011	PMVK	multimodal
NM_001323027	IQCG	included
NM_001323030	IQCG	included
NM_001323069	PFKP	multimodal
NM_001323073	PFKP	multimodal
NM_001323423	RBM39	excluded
NM_001323960	RBCK1	included
NM_001323985	CTNNA1	middle
NM_001324303	RPN2	multimodal
NM_001324306	RPN2	multimodal
NM_001329402	VMP1	multimodal
NM_001329417	TMA7	excluded
NM_001329502	GPX1	multimodal
NM_001329503	GPX1	multimodal
NM_001329559	TIMM50	excluded
NM_001329570	NIPSNAP3A	excluded
NM_001329609	ARL16	multimodal
NM_001329678	PAXX	multimodal
NM_001329722	TMEM54	multimodal
NM_001329752	FAM136A	excluded
NM_001329921	CALM3	excluded
NM_001330176	COPRS	multimodal
NM_001330200	RPL19	middle
NM_001330206	MIEN1	excluded
NM_001330269	ATP5MC2	included
NM_001330284	MZT2B	included
NM_001330286	DUT	excluded
NM_001330312	CD9	multimodal
NM_001330337	CBWD2	excluded
NM_001330393	VEZF1	excluded
NM_001330421	CYB561	multimodal
NM_001330426	NAGK	excluded
NM_001330469	COPE	excluded
NM_001330536	CENPX	multimodal
NM_001330692	PSMD4	included
NM_001330985	TMEM230	multimodal
NM_001344	DAD1	included
NM_001346500	CD164	excluded
NM_001346663	TK1	multimodal
NM_001346879	POLR2H	included
NM_001347892	TMX2	included
NM_001348065	DCTN2	multimodal
NM_001348129	NBDY	excluded
NM_001348133	CCNI	excluded
NM_001348957	SMIM26	included
NM_001348958	SMIM26	excluded
NM_001350968	C7orf50	multimodal
NM_001351263	TSPAN15	excluded
NM_001352773	JUP	middle
NM_001352777	JUP	multimodal
NM_001353053	GSN	excluded
NM_001353264	FAM49B	excluded
NM_001353337	ANKRD36B	excluded
NM_001353402	NDUFAF8	multimodal
NM_001354457	PLPP5	multimodal
NM_001354845	CCNB1	excluded
NM_001354928	VCP	excluded
NM_001355006	NPM1	bimodal
NM_001355009	NPM1	included
NM_001355019	PPP2CA	excluded
NM_001355401	NPIPB12	multimodal
NM_001357	DHX9	excluded
NM_001357943	GAPDH	included
NM_001359651	PEF1	multimodal
NM_001362531	CKB	multimodal
NM_001362750	AHCY	excluded
NM_001362896	PUF60	included
NM_001363000	THEM6	multimodal
NM_001363602	NDUFS7	included
NM_001363669	CALM1	excluded
NM_001363673	ELOF1	multimodal
NM_001363688	NPC2	included
NM_001363695	PPT1	middle
NM_001363697	RPL28	multimodal
NM_001363735	TMED3	included
NM_001363778	SYNGR2	included
NM_001363785	EIF3L	excluded
NM_001363810	VMA21	excluded
NM_001363848	TK1	multimodal
NM_001363860	RPS16	excluded
NM_001363872	PLSCR1	excluded
NM_001363881	HMCES	multimodal
NM_001363887	LRCH3	included
NM_001363963	DERL1	excluded
NM_001363994	CANX	multimodal
NM_001364007	NOTCH2NLB	excluded
NM_001364008	NOTCH2NLB	excluded
NM_001364013	NOTCH2NLC	excluded
NM_001364126	CLTB	middle
NM_001364127	CLTB	multimodal
NM_001364239	HNRNPH1	middle
NM_001364683	TPM3	included
NM_001365304	LOC112694756	included
NM_001365717	LRCH3	included
NM_001365719	LRCH3	included
NM_001365754	MIF4GD	multimodal
NM_001365761	MICOS13	included
NM_001365774	ALDH9A1	excluded
NM_001365776	TPM1	bimodal
NM_001365777	TPM1	multimodal
NM_001365782	TPM1	multimodal
NM_001366292	COX7A2	excluded
NM_001366293	COX7A2	included
NM_001366481	RPL7L1	excluded
NM_001366643	SAP18	excluded
NM_001366994	IFI27	multimodal
NM_001367837	TPM4	included
NM_001369744	ITGB1BP1	excluded
NM_001369751	SNRPD2	included
NM_001369752	SNRPD2	included
NM_001369859	PTP4A2	excluded
NM_001370177	NA	excluded
NM_001370340	NA	excluded
NM_001370345	NA	excluded
NM_001371394	NA	excluded
NM_001371720	NA	multimodal
NM_001371734	NA	excluded
NM_001374178	NA	included
NM_001374326	NA	excluded
NM_001374407	NA	multimodal
NM_001374512	NA	multimodal
NM_001374593	NA	excluded
NM_001375354	NA	multimodal
NM_001375991	NA	included
NM_001376560	NA	multimodal
NM_001376902	NA	multimodal
NM_001377298	NA	excluded
NM_001377300	NA	included
NM_001377527	NA	multimodal
NM_001378351	NA	middle
NM_001378451	NA	excluded
NM_001378495	NA	excluded
NM_001379043	NA	excluded
NM_001379366	NA	middle
NM_001381852	NA	included
NM_001381911	NA	excluded
NM_001381943	NA	middle
NM_001382003	NA	included
NM_001382225	NA	included
NM_001382293	NA	included
NM_001382294	NA	middle
NM_001382365	NA	middle
NM_001382366	NA	middle
NM_001382542	NA	multimodal
NM_001382727	NA	multimodal
NM_001382730	NA	multimodal
NM_001384280	NA	multimodal
NM_001384714	NA	excluded
NM_001384982	NA	multimodal
NM_001385254	NA	excluded
NM_001385265	NA	excluded
NM_001385266	NA	excluded
NM_001386740	NA	excluded
NM_001386875	NA	excluded
NM_001387651	NA	multimodal
NM_001387846	NA	excluded
NM_001388314	NA	multimodal
NM_001388318	NA	excluded
NM_001393653	NA	excluded
NM_001393915	NA	excluded
NM_001393919	NA	excluded
NM_001394000	NA	excluded
NM_001394149	NA	excluded
NM_001394674	NA	excluded
NM_001394769	NA	multimodal
NM_001398	ECH1	included
NM_001402	EEF1A1	excluded
NM_001404	EEF1G	included
NM_001418	EIF4G2	included
NM_001424	EMP2	excluded
NM_001487	BLOC1S1	excluded
NM_001537	HSBP1	excluded
NM_001540	HSPB1	middle
NM_001554	CCN1	excluded
NM_001618	PARP1	excluded
NM_001636	SLC25A6	middle
NM_001647	APOD	excluded
NM_001658	ARF1	included
NM_001660	ARF4	included
NM_001662	ARF5	included
NM_001675	ATF4	included
NM_001677	ATP1B1	excluded
NM_001679	ATP1B3	excluded
NM_001686	ATP5F1B	included
NM_001687	ATP5F1D	included
NM_001688	ATP5PB	excluded
NM_001731	BTG1	excluded
NM_001743	CALM2	middle
NM_001757	CBR1	excluded
NM_001777	CD47	excluded
NM_001791	CDC42	excluded
NM_001826	CKS1B	included
NM_001827	CKS2	multimodal
NM_001862	COX5B	excluded
NM_001866	COX7B	excluded
NM_001867	COX7C	excluded
NM_001878	CRABP2	included
NM_001909	CTSD	middle
NM_001914	CYB5A	excluded
NM_001916	CYC1	included
NM_001961	EEF2	excluded
NM_001967	EIF4A2	middle
NM_001985	ETFB	excluded
NM_002014	FKBP4	excluded
NM_002085	GPX4	included
NM_002086	GRB2	multimodal
NM_002087	GRN	multimodal
NM_002094	GSPT1	excluded
NM_002097	GTF3A	multimodal
NM_002106	H2AFZ	included
NM_002116	HLA-A	multimodal
NM_002117	HLA-C	excluded
NM_002136	HNRNPA1	excluded
NM_002139	RBMX	multimodal
NM_002156	HSPD1	multimodal
NM_002157	HSPE1	excluded
NM_002165	ID1	multimodal
NM_002166	ID2	excluded
NM_002167	ID3	included
NM_002168	IDH2	excluded
NM_002228	JUN	excluded
NM_002266	KPNA2	excluded
NM_002273	KRT8	included
NM_002276	KRT19	included
NM_002295	RPSA	excluded
NM_002306	LGALS3	excluded
NM_002337	LRPAP1	excluded
NM_002354	EPCAM	multimodal
NM_002437	MPV17	multimodal
NM_002455	MTX1	included
NM_002488	NDUFA2	multimodal
NM_002489	NDUFA4	excluded
NM_002490	NDUFA6	excluded
NM_002491	NDUFB3	included
NM_002493	NDUFB6	excluded
NM_002534	OAS1	multimodal
NM_002537	OAZ2	multimodal
NM_002567	PEBP1	excluded
NM_002568	PABPC1	excluded
NM_002573	PAFAH1B3	included
NM_002629	PGAM1	multimodal
NM_002635	SLC25A3	excluded
NM_002695	POLR2E	excluded
NM_002696	POLR2G	multimodal
NM_002710	PPP1CC	multimodal
NM_002773	PRSS8	included
NM_002787	PSMA2	excluded
NM_002790	PSMA5	excluded
NM_002791	PSMA6	included
NM_002792	PSMA7	multimodal
NM_002793	PSMB1	included
NM_002798	PSMB6	included
NM_002806	PSMC6	excluded
NM_002808	PSMD2	included
NM_002810	PSMD4	middle
NM_002811	PSMD7	excluded
NM_002812	PSMD8	middle
NM_002815	PSMD11	excluded
NM_002823	PTMA	middle
NM_002904	NELFE	excluded
NM_002939	RNH1	multimodal
NM_002947	RPA3	excluded
NM_002948	RPL15	excluded
NM_002949	MRPL12	multimodal
NM_002950	RPN1	excluded
NM_002952	RPS2	middle
NM_002965	S100A9	included
NM_002966	S100A10	middle
NM_002970	SAT1	included
NM_002997	SDC1	middle
NM_002999	SDC4	multimodal
NM_003000	SDHB	excluded
NM_003001	SDHC	middle
NM_003009	SELENOW	middle
NM_003016	SRSF2	included
NM_003017	SRSF3	excluded
NM_003022	SH3BGRL	multimodal
NM_003079	SMARCE1	excluded
NM_003090	SNRPA1	excluded
NM_003091	SNRPB	included
NM_003093	SNRPC	middle
NM_003094	SNRPE	excluded
NM_003107	SOX4	excluded
NM_003129	SQLE	excluded
NM_003130	SRI	excluded
NM_003133	SRP9	included
NM_003134	SRP14	excluded
NM_003145	SSR2	included
NM_003168	SUPT4H1	excluded
NM_003172	SURF1	excluded
NM_003187	TAF9	included
NM_003217	TMBIM6	included
NM_003258	TK1	included
NM_003276	TMPO	multimodal
NM_003295	TPT1	excluded
NM_003299	HSP90B1	middle
NM_003311	PHLDA2	excluded
NM_003321	TUFM	excluded
NM_003329	TXN	excluded
NM_003337	UBE2B	excluded
NM_003348	UBE2N	excluded
NM_003352	SUMO1	excluded
NM_003366	UQCRC2	excluded
NM_003374	VDAC1	included
NM_003379	EZR	multimodal
NM_003407	ZFP36	multimodal
NM_003457	ZNF207	excluded
NM_003491	NAA10	excluded
NM_003495	HIST1H4I	included
NM_003516	HIST2H2AA3	included
NM_003610	RAE1	excluded
NM_003641	IFITM1	excluded
NM_003676	DEGS1	excluded
NM_003689	AKR7A2	multimodal
NM_003731	SSNA1	included
NM_003754	EIF3F	excluded
NM_003756	EIF3H	excluded
NM_003757	EIF3I	middle
NM_003761	VAMP8	included
NM_003776	MRPL40	multimodal
NM_003779	B4GALT3	multimodal
NM_003792	EDF1	included
NM_003795	SNX3	excluded
NM_003801	GPAA1	multimodal
NM_003827	NAPA	multimodal
NM_003860	BANF1	middle
NM_003863	DPM2	multimodal
NM_003897	IER3	multimodal
NM_003915	CPNE1	multimodal
NM_003932	ST13	excluded
NM_003945	ATP6V0E1	excluded
NM_003973	RPL14	excluded
NM_003979	GPRC5A	excluded
NM_004034	ANXA7	excluded
NM_004048	B2M	middle
NM_004074	COX8A	included
NM_004077	CS	multimodal
NM_004083	DDIT3	multimodal
NM_004092	ECHS1	multimodal
NM_004095	EIF4EBP1	included
NM_004125	DNAJC25-GNG10	excluded
NM_004148	NINJ1	included
NM_004161	RAB1A	excluded
NM_004223	UBE2L6	multimodal
NM_004231	ATP6V1F	included
NM_004252	SLC9A3R1	included
NM_004255	COX5A	excluded
NM_004261	SELENOF	excluded
NM_004280	EEF1E1	excluded
NM_004295	TRAF4	excluded
NM_004322	BAD	multimodal
NM_004331	BNIP3L	excluded
NM_004335	BST2	middle
NM_004339	PTTG1IP	multimodal
NM_004343	CALR	multimodal
NM_004373	COX6A1	included
NM_004374	COX6C	excluded
NM_004393	DAG1	excluded
NM_004394	DAP	multimodal
NM_004417	DUSP1	multimodal
NM_004433	ELF3	excluded
NM_004450	ERH	included
NM_004493	HSD17B10	multimodal
NM_004499	HNRNPAB	middle
NM_004501	HNRNPU	excluded
NM_004508	IDI1	excluded
NM_004528	MGST3	excluded
NM_004537	NAP1L1	excluded
NM_004542	NDUFA3	excluded
NM_004544	NDUFA10	excluded
NM_004547	NDUFB4	excluded
NM_004549	NDUFC2	excluded
NM_004551	NDUFS3	multimodal
NM_004593	TRA2B	excluded
NM_004607	TBCA	excluded
NM_004637	RAB7A	multimodal
NM_004663	RAB11A	excluded
NM_004691	ATP6V0D1	excluded
NM_004699	FAM50A	excluded
NM_004708	PDCD5	excluded
NM_004710	SYNGR2	included
NM_004712	HGS	multimodal
NM_004713	NEMF	multimodal
NM_004718	COX7A2L	excluded
NM_004800	TM9SF2	excluded
NM_004862	LITAF	middle
NM_004888	ATP6V1G1	excluded
NM_004905	PRDX6	excluded
NM_004925	AQP3	multimodal
NM_004926	ZFP36L1	excluded
NM_004960	FUS	multimodal
NM_004965	HMGN1	included
NM_005001	NDUFA7	excluded
NM_005002	NDUFA9	excluded
NM_005008	SNU13	excluded
NM_005015	OXA1L	excluded
NM_005022	PFN1	middle
NM_005034	POLR2K	excluded
NM_005101	ISG15	included
NM_005105	RBM8A	excluded
NM_005168	RND3	multimodal
NM_005216	DDOST	excluded
NM_005252	FOS	excluded
NM_005313	PDIA3	excluded
NM_005319	HIST1H1C	multimodal
NM_005324	H3F3B	excluded
NM_005327	HADH	multimodal
NM_005340	HINT1	excluded
NM_005347	HSPA5	excluded
NM_005381	NCL	excluded
NM_005439	MLF2	included
NM_005494	DNAJB6	multimodal
NM_005506	SCARB2	excluded
NM_005507	CFL1	middle
NM_005514	HLA-B	multimodal
NM_005516	HLA-E	excluded
NM_005517	HMGN2	excluded
NM_005524	HES1	multimodal
NM_005556	KRT7	included
NM_005567	LGALS3BP	included
NM_005600	NIT1	multimodal
NM_005614	RHEB	excluded
NM_005620	S100A11	middle
NM_005669	REEP5	excluded
NM_005698	SCAMP3	multimodal
NM_005720	ARPC1B	multimodal
NM_005721	ACTR3	excluded
NM_005722	ACTR2	excluded
NM_005724	TSPAN3	excluded
NM_005729	PPIF	excluded
NM_005762	TRIM28	excluded
NM_005765	ATP6AP2	multimodal
NM_005776	CNIH1	excluded
NM_005782	ALYREF	excluded
NM_005787	ALG3	excluded
NM_005789	PSME3	excluded
NM_005796	NUTF2	excluded
NM_005801	EIF1	excluded
NM_005803	FLOT1	excluded
NM_005805	PSMD14	multimodal
NM_005809	PRDX2	middle
NM_005817	PLIN3	excluded
NM_005827	SLC35B1	excluded
NM_005837	POP7	multimodal
NM_005849	IGSF6	included
NM_005856	RAMP3	multimodal
NM_005870	SAP18	excluded
NM_005911	MAT2A	multimodal
NM_005953	MT2A	multimodal
NM_005971	FXYD3	excluded
NM_005980	S100P	included
NM_005998	CCT3	included
NM_006003	UQCRFS1	excluded
NM_006012	CLPP	excluded
NM_006013	RPL10	excluded
NM_006014	LAGE3	multimodal
NM_006022	TSC22D1	excluded
NM_006082	TUBA1B	included
NM_006088	TUBB4B	included
NM_006156	NEDD8	included
NM_006164	NFE2L2	excluded
NM_006184	NUCB1	multimodal
NM_006191	PA2G4	excluded
NM_006192	PAX1	bimodal
NM_006223	PIN4	excluded
NM_006234	POLR2J	excluded
NM_006265	RAD21	excluded
NM_006275	SRSF6	multimodal
NM_006304	SEM1	excluded
NM_006327	TIMM23	included
NM_006335	TIMM17A	excluded
NM_006337	MCRS1	multimodal
NM_006339	HMG20B	middle
NM_006349	ZNHIT1	multimodal
NM_006356	ATP5PD	included
NM_006368	CREB3	multimodal
NM_006396	ZNRD2	excluded
NM_006401	ANP32B	excluded
NM_006407	ARL6IP5	excluded
NM_006408	AGR2	excluded
NM_006412	AGPAT2	multimodal
NM_006423	RABAC1	multimodal
NM_006428	MRPL28	excluded
NM_006430	CCT4	excluded
NM_006431	CCT2	multimodal
NM_006432	NPC2	included
NM_006435	IFITM2	included
NM_006443	DNPH1	multimodal
NM_006471	MYL12A	middle
NM_006476	ATP5MG	excluded
NM_006496	GNAI3	excluded
NM_006519	DYNLT1	included
NM_006579	EBP	included
NM_006597	HSPA8	included
NM_006600	NUDC	excluded
NM_006622	PLK2	multimodal
NM_006636	MTHFD2	excluded
NM_006645	STARD10	multimodal
NM_006694	JTB	excluded
NM_006708	GLO1	multimodal
NM_006713	SUB1	excluded
NM_006743	RBM3	excluded
NM_006761	YWHAE	excluded
NM_006793	PRDX3	excluded
NM_006795	EHD1	multimodal
NM_006801	KDELR1	excluded
NM_006808	SEC61B	multimodal
NM_006811	SERINC3	excluded
NM_006815	TMED2	excluded
NM_006816	LMAN2	multimodal
NM_006826	YWHAQ	included
NM_006827	TMED10	excluded
NM_006829	ADIRF	excluded
NM_006830	UQCR11	excluded
NM_006833	COPS6	excluded
NM_006854	KDELR2	multimodal
NM_006870	DSTN	excluded
NM_006886	ATP5F1E	excluded
NM_006899	IDH3B	multimodal
NM_006907	PYCR1	multimodal
NM_006908	RAC1	excluded
NM_006923	SDF2	excluded
NM_006924	SRSF1	excluded
NM_006925	SRSF5	excluded
NM_006930	SKP1	excluded
NM_006937	SUMO2	excluded
NM_007006	NUDT21	excluded
NM_007033	RER1	excluded
NM_007065	CDC37	multimodal
NM_007099	ACP1	multimodal
NM_007104	RPL10A	middle
NM_007108	ELOB	excluded
NM_007178	STRAP	excluded
NM_007208	MRPL3	excluded
NM_007236	CHP1	multimodal
NM_007278	GABARAP	excluded
NM_007285	GABARAPL2	included
NM_007364	TMED3	included
NM_007367	RALY	excluded
NM_012203	GRHPR	multimodal
NM_012319	SLC39A6	excluded
NM_012321	LSM4	excluded
NM_012322	LSM5	excluded
NM_012325	MAPRE1	middle
NM_012391	SPDEF	included
NM_012394	PFDN2	middle
NM_012412	H2AFV	excluded
NM_012433	SF3B1	excluded
NM_012456	TIMM10	excluded
NM_012458	TIMM13	excluded
NM_012459	TIMM8B	multimodal
NM_012473	TXN2	excluded
NM_013238	DNAJC15	excluded
NM_013258	PYCARD	middle
NM_013336	SEC61A1	multimodal
NM_013349	NENF	excluded
NM_013379	DPP7	multimodal
NM_013387	UQCR10	excluded
NM_013442	STOML2	excluded
NM_013995	LAMP2	included
NM_014041	SPCS1	excluded
NM_014046	MRPS18B	multimodal
NM_014047	C19orf53	excluded
NM_014050	MRPL42	excluded
NM_014060	MCTS1	excluded
NM_014077	FAM32A	multimodal
NM_014078	MRPL13	excluded
NM_014106	ZNF770	excluded
NM_014172	PHPT1	included
NM_014175	MRPL15	excluded
NM_014182	ORMDL2	excluded
NM_014187	TMEM208	included
NM_014188	SSU72	multimodal
NM_014206	TMEM258	excluded
NM_014220	TM4SF1	included
NM_014222	NDUFA8	middle
NM_014225	PPP2R1A	excluded
NM_014248	RBX1	excluded
NM_014255	CNPY2	excluded
NM_014267	C11orf58	excluded
NM_014313	TMEM50A	excluded
NM_014330	PPP1R15A	included
NM_014335	EID1	excluded
NM_014341	MTCH1	included
NM_014367	FAM162A	excluded
NM_014380	BEX3	included
NM_014394	GHITM	excluded
NM_014399	TSPAN13	middle
NM_014402	UQCRQ	excluded
NM_014445	SERP1	excluded
NM_014455	RNF115	excluded
NM_014463	LSM3	excluded
NM_014501	UBE2S	excluded
NM_014604	TAX1BP3	included
NM_014623	MEA1	included
NM_014624	S100A6	middle
NM_014713	LAPTM4A	middle
NM_014736	PCLAF	excluded
NM_014740	EIF4A3	excluded
NM_014752	SPCS2	excluded
NM_014765	TOMM20	excluded
NM_015051	ERP44	excluded
NM_015161	ARL6IP1	middle
NM_015388	YIPF3	multimodal
NM_015391	ANAPC13	multimodal
NM_015392	NPDC1	included
NM_015415	MPC2	excluded
NM_015497	TMEM87A	excluded
NM_015564	LRRTM2	included
NM_015584	POLDIP2	multimodal
NM_015702	MMADHC	excluded
NM_015853	UBXN1	multimodal
NM_015871	ZNF593	multimodal
NM_015920	RPS27L	excluded
NM_015921	CUTA	excluded
NM_015932	POMP	excluded
NM_015933	TMA7	excluded
NM_015949	GET4	excluded
NM_015966	ERGIC3	middle
NM_015971	MRPS7	included
NM_016002	SCCPDH	excluded
NM_016022	APH1A	included
NM_016038	SBDS	multimodal
NM_016039	RTRAF	excluded
NM_016047	SF3B6	multimodal
NM_016061	YPEL5	excluded
NM_016062	CIAO2B	excluded
NM_016065	MRPS16	excluded
NM_016068	FIS1	excluded
NM_016070	MRPS23	excluded
NM_016079	CHMP3	excluded
NM_016085	ATRAID	included
NM_016100	NAA20	middle
NM_016127	SARAF	multimodal
NM_016131	RAB10	excluded
NM_016145	WDR83OS	multimodal
NM_016199	LSM7	multimodal
NM_016200	LSM8	excluded
NM_016208	VPS28	included
NM_016219	MAN1B1	multimodal
NM_016237	ANAPC5	excluded
NM_016275	SELENOT	excluded
NM_016283	AK6	excluded
NM_016286	DCXR	middle
NM_016311	ATP5IF1	included
NM_016400	HYPK	excluded
NM_016404	TRMT112	included
NM_016406	UFC1	included
NM_016462	TMEM14C	multimodal
NM_016470	OSER1	excluded
NM_016480	PAIP2	multimodal
NM_016491	MRPL37	excluded
NM_016494	RNF181	excluded
NM_016497	MRPL51	excluded
NM_016504	MRPL27	multimodal
NM_016520	C9orf78	excluded
NM_016565	COA4	multimodal
NM_016592	GNAS	excluded
NM_016639	TNFRSF12A	multimodal
NM_016641	GDE1	excluded
NM_016816	OAS1	multimodal
NM_017491	WDR1	multimodal
NM_017510	TMED9	excluded
NM_017528	BUD23	excluded
NM_017670	OTUB1	excluded
NM_017819	TRMT10C	excluded
NM_017823	DUSP23	multimodal
NM_017841	SDHAF2	excluded
NM_017861	PIGX	excluded
NM_017866	TMEM70	excluded
NM_017896	GID8	excluded
NM_017907	LAMTOR1	multimodal
NM_017914	C19orf24	multimodal
NM_017924	C14orf119	excluded
NM_017971	MRPL20	included
NM_018049	PLEKHJ1	included
NM_018407	LAPTM4B	excluded
NM_018445	SELENOS	excluded
NM_018453	EAPP	multimodal
NM_018462	BRK1	multimodal
NM_018491	CBWD1	excluded
NM_018648	NOP10	included
NM_018670	MESP1	multimodal
NM_018683	RNF114	excluded
NM_018838	NDUFA12	included
NM_018946	NANS	middle
NM_018947	CYCS	excluded
NM_018997	MRPS21	excluded
NM_019026	TMCO1	excluded
NM_019037	EXOSC4	multimodal
NM_019059	TOMM7	included
NM_019107	MYDGF	excluded
NM_019613	WDR45B	multimodal
NM_020154	EMC7	multimodal
NM_020202	NIT2	excluded
NM_020307	CCNL1	excluded
NM_020387	RAB25	included
NM_020529	NFKBIA	multimodal
NM_020531	APMAP	multimodal
NM_020532	RTN4	excluded
NM_020672	S100A14	multimodal
NM_020791	TAOK1	excluded
NM_020992	PDLIM1	multimodal
NM_021009	UBC	included
NM_021029	RPL36A	excluded
NM_021034	IFITM3	middle
NM_021095	SLC5A6	multimodal
NM_021103	TMSB10	middle
NM_021104	RPL41	excluded
NM_021109	TMSB4X	included
NM_021128	POLR2L	excluded
NM_021129	PPA1	included
NM_021130	PPIA	excluded
NM_021173	POLD4	excluded
NM_021177	LSM2	multimodal
NM_021203	SRPRB	excluded
NM_021237	SELENOK	excluded
NM_021243	ABRACL	excluded
NM_021709	SIVA1	included
NM_021960	MCL1	multimodal
NM_021999	ITM2B	excluded
NM_022044	SDF2L1	middle
NM_022100	MRPS14	excluded
NM_022121	PERP	excluded
NM_022130	GOLPH3	excluded
NM_022488	ATG3	excluded
NM_022818	MAP1LC3B	excluded
NM_022873	IFI6	multimodal
NM_022877	SMN2	multimodal
NM_023080	C8orf33	excluded
NM_023934	FUNDC2	excluded
NM_023935	DDRGK1	excluded
NM_023936	MRPS34	multimodal
NM_024026	MRPL57	excluded
NM_024038	TRIR	included
NM_024051	GGCT	included
NM_024071	ZFYVE21	included
NM_024092	TMEM109	middle
NM_024112	C9orf16	multimodal
NM_024348	DCTN3	multimodal
NM_024592	SRD5A3	excluded
NM_024613	PLEKHF2	excluded
NM_025124	TMEM134	excluded
NM_025146	NAA50	excluded
NM_030789	HM13	middle
NM_030811	MRPS26	included
NM_030916	NECTIN4	included
NM_030939	C6orf62	multimodal
NM_030978	ARPC5L	excluded
NM_030981	RAB1B	included
NM_031243	HNRNPA2B1	excluded
NM_031263	HNRNPK	excluded
NM_031286	SH3BGRL3	included
NM_031287	SF3B5	bimodal
NM_031298	EMC6	multimodal
NM_031308	EPPK1	excluded
NM_031314	HNRNPC	excluded
NM_031370	HNRNPD	excluded
NM_031372	HNRNPDL	excluded
NM_031420	MRPL9	included
NM_031452	RAMAC	excluded
NM_031844	HNRNPU	excluded
NM_031903	MRPL32	excluded
NM_031991	PTBP1	multimodal
NM_032014	MRPS24	included
NM_032112	MRPL43	multimodal
NM_032193	RNASEH2C	excluded
NM_032231	CIAO2A	excluded
NM_032272	MAF1	middle
NM_032286	MED10	excluded
NM_032302	PSMG3	multimodal
NM_032306	ALKBH7	excluded
NM_032338	LLPH	excluded
NM_032339	MIEN1	excluded
NM_032350	C7orf50	multimodal
NM_032353	VPS25	multimodal
NM_032360	ACBD6	multimodal
NM_032361	THOC3	excluded
NM_032366	METTL26	multimodal
NM_032412	CYSTM1	excluded
NM_032476	MRPS6	included
NM_032477	MRPL41	included
NM_032479	MRPL36	included
NM_032574	DPY30	included
NM_032656	DHX37	multimodal
NM_032667	BSCL2	multimodal
NM_032731	TXNDC17	excluded
NM_032773	LRCH3	included
NM_032901	COX14	included
NM_032906	PYURF	included
NM_032989	BAD	multimodal
NM_033318	SMDT1	excluded
NM_033362	MRPS12	excluded
NM_033363	MRPS12	included
NM_033504	TMEM54	multimodal
NM_033546	MYL12B	excluded
NM_033630	SCAND1	multimodal
NM_033643	RPL36	excluded
NM_033668	ITGB1	multimodal
NM_044472	CDC42	included
NM_052844	WDR34	multimodal
NM_052850	GADD45GIP1	excluded
NM_052886	MAL2	multimodal
NM_052951	DNTTIP1	multimodal
NM_053050	MRPL53	included
NM_053056	CCND1	excluded
NM_053275	RPLP0	multimodal
NM_054014	FKBP1A	included
NM_054016	SRSF10	excluded
NM_080593	HIST1H2BK	included
NM_080626	BRI3BP	multimodal
NM_080648	APEX1	included
NM_080652	TMEM41A	excluded
NM_080821	FAM210B	excluded
NM_130786	A1BG	excluded
NM_133639	RHOV	multimodal
NM_134265	WSB1	excluded
NM_138288	SPTSSA	excluded
NM_138446	MALSU1	excluded
NM_138610	H2AFY	multimodal
NM_138689	PPP1R14B	multimodal
NM_138764	BAX	excluded
NM_138820	HIGD2A	multimodal
NM_138924	GAMT	multimodal
NM_139062	CSNK1D	excluded
NM_139323	YWHAB	excluded
NM_144578	MAPK1IP1L	excluded
NM_144772	NAXE	excluded
NM_145169	SFT2D1	excluded
NM_145252	ZG16B	multimodal
NM_145330	MRPL33	multimodal
NM_145729	MRPL24	multimodal
NM_145792	MGST1	middle
NM_148912	ABHD11	multimodal
NM_148919	PSMB8	multimodal
NM_148976	PSMA1	multimodal
NM_152285	ARRDC1	multimodal
NM_152685	SLC23A1	included
NM_152766	TMEM256	multimodal
NM_152862	ARPC2	excluded
NM_153001	PSMC4	excluded
NM_153200	EDF1	included
NM_153201	HSPA8	included
NM_153280	UBA1	excluded
NM_153373	PHYKPL	multimodal
NM_153824	PYCR1	multimodal
NM_170679	SKP1	excluded
NM_170708	LMNA	excluded
NM_170739	MRPL11	excluded
NM_172251	MRPL54	multimodal
NM_173614	NOMO2	multimodal
NM_174886	TGIF1	excluded
NM_174909	TMEM167A	excluded
NM_175732	PTPMT1	excluded
NM_175932	PSMD13	multimodal
NM_176783	PSME1	included
NM_177534	SULT1A1	excluded
NM_177542	SNRPD2	included
NM_177543	PLPP2	included
NM_177552	SULT1A3	excluded
NM_177925	H2AFJ	multimodal
NM_177983	PPM1G	multimodal
NM_178190	ATP5IF1	included
NM_178191	ATP5IF1	included
NM_178578	PSMF1	excluded
NM_178582	HM13	included
NM_180982	MRPL52	excluded
NM_181462	MRPL55	included
NM_181466	EIF6	included
NM_181468	EIF6	included
NM_181528	NAA20	middle
NM_181652	PRDX5	middle
NM_181800	UBE2C	multimodal
NM_181836	TMED7	excluded
NM_181843	NUDT8	multimodal
NM_182649	PCNA	excluded
NM_182685	EFNA1	included
NM_182776	MCM7	multimodal
NM_182810	ATF4	included
NM_182917	EIF4G1	excluded
NM_183057	VPS28	included
NM_183237	RNF7	excluded
NM_183241	PAXX	middle
NM_183425	RBM38	multimodal
NM_184043	ALDOA	included
NM_194261	UBE2I	excluded
NM_194326	RPS19BP1	multimodal
NM_194434	VAPA	excluded
NM_197955	C15orf48	excluded
NM_197966	BID	excluded
NM_198057	TSC22D3	included
NM_198175	NME1	excluded
NM_198242	EIF4G1	excluded
NM_198426	CHMP2A	middle
NM_198536	TMEM205	included
NM_198590	BSG	included
NM_198591	BSG	included
NM_198883	MTX1	included
NM_198976	NELFCD	multimodal
NM_199074	NDUFAF3	excluded
NM_199184	DNPH1	multimodal
NM_201384	PLEC	excluded
NM_201397	GPX1	multimodal
NM_201429	RTN3	middle
NM_203298	CHCHD1	excluded
NM_203401	STMN1	excluded
NM_203458	NOTCH2NLA	excluded
NM_203464	AK4	excluded
NM_206917	BEX3	excluded
NM_206918	DEGS2	excluded
NM_207047	ENSA	included
NM_207168	ENSA	included
NM_212460	ARL4A	excluded
NM_212552	BOLA3	excluded
NM_213725	RPLP1	excluded
NR_001317	HCG4B	included
NR_001434	HLA-H	included
NR_001445	RN7SK	multimodal
NR_002201	FTH1P3	multimodal
NR_002308	UQCRBP1	multimodal
NR_002315	H3F3AP4	excluded
NR_002453	SMG1P5	multimodal
NR_002454	LOC606724	included
NR_002556	LOC388242	multimodal
NR_002594	SLC7A5P2	bimodal
NR_002715	RN7SL1	multimodal
NR_002985	SNORA58	included
NR_002988	SNORA74B	included
NR_003010	SCARNA12	included
NR_003015	SNORA53	included
NR_003189	SYS1-DBNDD2	included
NR_003225	LGALS3	excluded
NR_003573	ANXA2P2	included
NR_003605	ZFAS1	middle
NR_023358	SCARNA9L	included
NR_024206	CYTOR	multimodal
NR_024373	MIR4435-2HG	multimodal
NR_024454	NDUFB2-AS1	excluded
NR_024456	LOC100190986	middle
NR_024629	IDI2-AS1	multimodal
NR_026712	RPL13AP5	middle
NR_027155	SMG1P3	multimodal
NR_027168	SNHG29	multimodal
NR_027260	RN7SL2	multimodal
NR_027406	LOC100129034	included
NR_027418	LINC00674	excluded
NR_027645	ATP1A1-AS1	multimodal
NR_028052	NGRN	included
NR_028323	SLC5A6	multimodal
NR_028370	PCNA-AS1	middle
NR_028443	SLC25A5-AS1	excluded
NR_028510	TYRO3P	bimodal
NR_029378	LOC100289511	excluded
NR_029426	SMA4	multimodal
NR_029434	PSMA3-AS1	included
NR_031762	HCP5B	multimodal
NR_033343	PSCA	excluded
NR_034041	SRSF1	excluded
NR_034106	CRNDE	excluded
NR_037600	LINC01578	excluded
NR_037608	SLX1A-SULT1A3	excluded
NR_037609	SLX1B-SULT1A4	multimodal
NR_037673	SERF2-C15ORF63	excluded
NR_037688	ACTG1	middle
NR_037717	RNASEK-C17orf49	multimodal
NR_037926	SENP3-EIF4A1	excluded
NR_037928	P2RX5-TAX1BP3	included
NR_037969	SRD5A3-AS1	included
NR_038111	SNHG16	excluded
NR_038193	METTL23	middle
NR_038286	PSMD6-AS2	multimodal
NR_038322	MAP3K13	excluded
NR_038410	TSPOAP1-AS1	excluded
NR_038894	CBR3-AS1	included
NR_040049	SDCBP2-AS1	included
NR_045586	SRA1	excluded
NR_046413	POLD4	excluded
NR_046633	NUCB1-AS1	multimodal
NR_046853	HM13-AS1	included
NR_049759	IFITM3	middle
NR_051984	PRC1-AS1	multimodal
NR_073084	CRIP2	middle
NR_073412	TMEM134	multimodal
NR_073609	PDCD6	included
NR_077246	RPS14P3	included
NR_102318	ACTR3	excluded
NR_102400	PYCARD-AS1	excluded
NR_102427	CIB1	included
NR_103560	GSN-AS1	multimodal
NR_103819	SNRPD3	excluded
NR_104029	DGUOK-AS1	included
NR_104165	MDH2	included
NR_104454	TMEM14B	middle
NR_109828	PCBP2-OT1	included
NR_109875	LOC101927100	included
NR_109878	LINC01726	bimodal
NR_110009	ADNP-AS1	included
NR_110044	LOC101926943	multimodal
NR_110578	CSNK1D	excluded
NR_110730	PTOV1-AS2	included
NR_120608	TUBB	excluded
NR_130143	LOC104968399	included
NR_132776	SNORA94	multimodal
NR_133645	S100A16	included
NR_134538	C7orf50	multimodal
NR_134671	TRAPPC2L	excluded
NR_134848	GAA	multimodal
NR_134869	HEXA	multimodal
NR_135305	SMG1P2	multimodal
NR_135587	DPY30	middle
NR_136278	LOC105375713	included
NR_136587	RBM39	multimodal
NR_138060	ARL16	multimodal
NR_144447	ZNF8-ERVK3-1	multimodal
NR_144567	MALAT1	included
NR_145425	RUSC1-AS1	included
NR_145721	SNORA74C-1	included
NR_145819	RNA45SN1	excluded
NR_145820	RNA18SN1	multimodal
NR_145822	RNA28SN1	multimodal
NR_146063	SMIM27	included
NR_146144	RNA45SN2	excluded
NR_146146	RNA18SN2	middle
NR_146148	RNA28SN2	multimodal
NR_146151	RNA45SN3	excluded
NR_146152	RNA18SN3	middle
NR_146154	RNA28SN3	multimodal
NR_146274	KRT7-AS	included
NR_146472	ELF3-AS1	multimodal
NR_146967	C7orf50	multimodal
NR_147233	TPM1-AS	multimodal
NR_148712	ENOSF1	multimodal
NR_155756	TBCB	excluded
NR_157088	CLTB	middle
NR_157580	LOC440292	excluded
NR_158216	LOC105370687	excluded
NR_160308	GCNT7	included
NR_160400	TIMM8B	multimodal
NR_160950	SNHG32	excluded
NR_163478	NA	excluded
NR_163943	NA	excluded
NR_171558	NA	multimodal
NR_171559	NA	multimodal
NR_171562	NA	multimodal

## Sheet: SRP133387_CTCclusters
APA_ID	Gene_Symbol	Modality
NM_000050	ASS1	excluded
NM_000099	CST3	middle
NM_000100	CSTB	included
NM_000101	CYBA	multimodal
NM_000146	FTL	included
NM_000269	NME1	excluded
NM_000270	PNP	multimodal
NM_000291	PGK1	excluded
NM_000294	PHKG2	multimodal
NM_000310	PPT1	middle
NM_000365	TPI1	middle
NM_000454	SOD1	excluded
NM_000485	APRT	excluded
NM_000507	FBP1	multimodal
NM_000574	CD55	excluded
NM_000581	GPX1	multimodal
NM_000700	ANXA1	excluded
NM_000701	ATP1A1	excluded
NM_000712	BLVRA	multimodal
NM_000713	BLVRB	middle
NM_000714	TSPO	included
NM_000754	COMT	excluded
NM_000801	FKBP1A	middle
NM_000852	GSTP1	excluded
NM_000903	NQO1	excluded
NM_000918	P4HB	included
NM_000943	PPIC	excluded
NM_000968	RPL4	excluded
NM_000971	RPL7	excluded
NM_000975	RPL11	excluded
NM_000977	RPL13	excluded
NM_000978	RPL23	excluded
NM_000981	RPL19	middle
NM_000983	RPL22	excluded
NM_000984	RPL23A	excluded
NM_000990	RPL27A	excluded
NM_000991	RPL28	excluded
NM_000992	RPL29	middle
NM_000993	RPL31	excluded
NM_000994	RPL32	excluded
NM_000996	RPL35A	excluded
NM_000997	RPL37	excluded
NM_000998	RPL37A	excluded
NM_001000	RPL39	included
NM_001001	RPL36AL	excluded
NM_001001392	CD44	excluded
NM_001001503	NDUFV3	excluded
NM_001001701	C4orf3	excluded
NM_001002027	ATP5MC1	included
NM_001002033	JPT1	excluded
NM_001002248	ANAPC11	included
NM_001002258	ATP5MC3	excluded
NM_001002858	ANXA2	excluded
NM_001004333	RNASEK	included
NM_001005354	PRR13	included
NM_001005474	NFKBIZ	excluded
NM_001005781	SUMO1	excluded
NM_001006941	ALG3	excluded
NM_001007	RPS4X	excluded
NM_001007070	SDCBP	multimodal
NM_001007074	RPL32	excluded
NM_001007214	CACYBP	excluded
NM_001007565	TFG	middle
NM_001008709	PPP1CA	included
NM_001009184	GRINA	excluded
NM_001009186	CCT6A	middle
NM_001009570	CCT7	included
NM_001010	RPS6	excluded
NM_001010858	RNF187	excluded
NM_001010974	BCAS4	multimodal
NM_001010989	HERPUD1	excluded
NM_001011537	FYTTD1	multimodal
NM_001012	RPS8	excluded
NM_001012270	BIRC5	excluded
NM_001012300	MCRS1	multimodal
NM_001012664	SLC3A2	included
NM_001013653	LRRC26	multimodal
NM_001014763	ETFB	multimodal
NM_001014990	MRPL22	excluded
NM_001017390	SULT1A4	included
NM_001017963	HSP90AA1	excluded
NM_001017998	GNG10	excluded
NM_001018004	TPM1	bimodal
NM_001018067	SERBP1	excluded
NM_001018136	NME1-NME2	included
NM_001018837	HAX1	included
NM_001019	RPS15A	excluded
NM_001022	RPS19	excluded
NM_001023	RPS20	middle
NM_001024212	S100A13	middle
NM_001024844	CD82	excluded
NM_001024957	BRMS1	multimodal
NM_001024960	ARPC4	included
NM_001025	RPS23	excluded
NM_001025071	RPS14	excluded
NM_001025205	AP2M1	included
NM_001029	RPS26	excluded
NM_001030018	APRT	included
NM_001030287	ATF3	included
NM_001031	RPS28	excluded
NM_001031677	RAB24	excluded
NM_001031684	SRSF7	excluded
NM_001031711	ERGIC1	multimodal
NM_001032409	OAS1	multimodal
NM_001033056	GLUL	excluded
NM_001033503	SAR1B	excluded
NM_001034	RRM2	excluded
NM_001034025	ERP29	excluded
NM_001035005	C18orf32	excluded
NM_001035513	SDHC	excluded
NM_001037164	ARL4A	excluded
NM_001037494	DYNLL1	middle
NM_001037811	HSD17B10	multimodal
NM_001039457	ATP6V0B	included
NM_001039490	CD151	multimodal
NM_001039577	CCNL2	multimodal
NM_001039712	DEDD	multimodal
NM_001040431	COA3	included
NM_001040619	ATF3	multimodal
NM_001040649	ACP1	multimodal
NM_001040874	HIST2H2AA4	included
NM_001042432	CLN3	multimodal
NM_001042462	TRAPPC5	excluded
NM_001042465	PSAP	included
NM_001042472	ABHD12	multimodal
NM_001042483	NUPR1	excluded
NM_001042679	RHOC	included
NM_001043352	TPM3	excluded
NM_001048249	SMIM15	excluded
NM_001069	TUBB2A	multimodal
NM_001070	TUBG1	included
NM_001077399	PNKD	included
NM_001077628	APH1A	included
NM_001078166	SRSF1	excluded
NM_001079862	DBI	included
NM_001085365	MZT2A	multimodal
NM_001085372	UQCC3	excluded
NM_001086521	NDUFAF8	multimodal
NM_001089591	UQCRHL	excluded
NM_001098208	HNRNPF	excluded
NM_001098398	COPA	excluded
NM_001098616	C1orf43	included
NM_001098673	ATG101	multimodal
NM_001098786	HILPDA	excluded
NM_001099406	SLC39A6	multimodal
NM_001099639	ZNF146	excluded
NM_001099645	RPL22L1	excluded
NM_001099668	HIGD1A	excluded
NM_001099693	RPL31	middle
NM_001101	ACTB	middle
NM_001102667	PSMA4	multimodal
NM_001102668	PSMA4	excluded
NM_001105204	RUSC1	included
NM_001105205	RUSC1	included
NM_001110503	TMEM87A	multimodal
NM_001113205	TSTD1	included
NM_001122955	BSCL2	multimodal
NM_001123355	PPP6C	excluded
NM_001123377	PARK7	excluded
NM_001126051	HDGF	included
NM_001127192	CNBP	excluded
NM_001127198	TMC6	excluded
NM_001127213	LY6E	included
NM_001127223	CD59	excluded
NM_001127393	ATP5MPL	excluded
NM_001127394	TSEN15	middle
NM_001127889	SPG21	multimodal
NM_001128203	PLAAT3	excluded
NM_001128914	PCBP2	multimodal
NM_001130004	ACTN1	excluded
NM_001130674	CALU	excluded
NM_001130678	EIF4E	excluded
NM_001130689	HMGB2	excluded
NM_001130725	PSMB5	included
NM_001130929	STMP1	excluded
NM_001134321	RTL8A	multimodal
NM_001134484	TOMM5	multimodal
NM_001134493	TOMM6	middle
NM_001135239	LDHA	excluded
NM_001135255	RBBP4	included
NM_001135592	RPS27A	excluded
NM_001135694	VDAC3	included
NM_001135702	YWHAZ	excluded
NM_001135998	NDUFB11	included
NM_001136008	FXYD3	included
NM_001136010	FXYD3	included
NM_001136016	APP	middle
NM_001136017	CCND3	multimodal
NM_001136134	RPL28	excluded
NM_001136136	RPL28	included
NM_001136137	RPL28	included
NM_001136232	SEC13	included
NM_001136268	DAZAP2	middle
NM_001136275	AKIRIN1	excluded
NM_001136497	BTF3L4	excluded
NM_001136498	CISD3	excluded
NM_001137553	LRRFIP1	excluded
NM_001139457	BCAP31	middle
NM_001142298	SQSTM1	included
NM_001142418	MORF4L2	included
NM_001142625	RAB34	multimodal
NM_001142627	SEC61A2	included
NM_001142648	SAR1A	excluded
NM_001142798	C17orf49	multimodal
NM_001142799	C17orf49	multimodal
NM_001143681	GSTK1	multimodal
NM_001143760	EIF5A	middle
NM_001143780	SLC25A39	middle
NM_001143841	TMEM106C	middle
NM_001143937	PSMA1	included
NM_001143985	BANF1	middle
NM_001144831	PHB2	included
NM_001144932	PSMB5	included
NM_001144943	RAB34	multimodal
NM_001144944	MYL12B	excluded
NM_001145145	SLC1A5	middle
NM_001145155	NR2F2	excluded
NM_001145156	NR2F2	excluded
NM_001145160	TPM4	multimodal
NM_001145355	CBWD1	excluded
NM_001145410	NONO	multimodal
NM_001145412	NFE2L2	excluded
NM_001145713	SAE1	excluded
NM_001145940	PAFAH1B3	included
NM_001146068	CAPN2	included
NM_001146178	IP6K2	multimodal
NM_001146191	MPZL1	excluded
NM_001146333	SUMF2	included
NM_001151	SLC25A4	excluded
NM_001152	SLC25A5	middle
NM_001154	ANXA5	excluded
NM_001159287	TPI1	middle
NM_001162407	CLK1	excluded
NM_001163424	COPS9	included
NM_001164189	PLIN3	middle
NM_001165415	LDHA	excluded
NM_001165931	RRM2	excluded
NM_001166103	SPINT2	excluded
NM_001166237	GSDMD	multimodal
NM_001168331	NDUFB4	multimodal
NM_001170406	CDK1	multimodal
NM_001170634	FUS	excluded
NM_001170795	ATRAID	included
NM_001171508	MCFD2	excluded
NM_001171511	MCFD2	excluded
NM_001172415	BAG1	excluded
NM_001172695	TSFM	excluded
NM_001172705	EIF4G2	included
NM_001173128	YTHDF2	excluded
NM_001177	ARL1	excluded
NM_001177643	DAG1	excluded
NM_001178087	SERF1B	middle
NM_001183	ATP6AP1	included
NM_001184722	GPI	excluded
NM_001184730	PIGT	included
NM_001184740	CTTN	included
NM_001184761	CLTA	included
NM_001184823	VDAC2	excluded
NM_001184891	FLAD1	multimodal
NM_001184979	NDUFS5	included
NM_001185	AZGP1	excluded
NM_001185012	NDUFA2	middle
NM_001185077	ARHGDIA	multimodal
NM_001185092	NIT1	multimodal
NM_001190329	ATP5MC3	excluded
NM_001190452	MTRNR2L1	excluded
NM_001190470	MTRNR2L2	excluded
NM_001190472	MTRNR2L3	included
NM_001190702	MTRNR2L8	excluded
NM_001190706	MTRNR2L9	excluded
NM_001190864	MRPS35	excluded
NM_001190991	CNPY2	included
NM_001190996	ARPC1A	included
NM_001191003	GSTO1	multimodal
NM_001193557	ENY2	excluded
NM_001193572	CSRP1	included
NM_001193655	CYBC1	excluded
NM_001195056	DDIT3	multimodal
NM_001195427	SRSF2	included
NM_001195478	TFG	middle
NM_001195536	CHMP5	excluded
NM_001197139	DBNDD2	included
NM_001198569	ATP6V0C	excluded
NM_001198719	RBBP7	excluded
NM_001198846	RBM14-RBM4	included
NM_001198868	CAPN1	multimodal
NM_001199038	SERINC2	multimodal
NM_001199142	EIF3C	excluded
NM_001199355	RPL17-C18orf32	excluded
NM_001199535	TGIF2-RAB5IF	included
NM_001199780	PSMB2	excluded
NM_001199786	FKBP1A	middle
NM_001199851	DAP3	excluded
NM_001199876	SERF2	excluded
NM_001199877	SERF2	excluded
NM_001199954	ACTG1	included
NM_001199957	NDUFB5	excluded
NM_001199975	UQCRB	excluded
NM_001201483	ENO1	included
NM_001202547	SYNJ2BP-COX16	excluded
NM_001204054	NDUFC2	excluded
NM_001204064	CHURC1	excluded
NM_001204082	MICOS10	excluded
NM_001204193	SRP19	excluded
NM_001204196	SRP19	excluded
NM_001204199	SRP19	included
NM_001204861	ELOC	excluded
NM_001206486	ATF3	multimodal
NM_001206799	PKM	included
NM_001206836	RAB11A	excluded
NM_001207000	HNRNPDL	excluded
NM_001212	C1QBP	included
NM_001220777	CDKN1A	middle
NM_001236	CBR3	multimodal
NM_001242375	ANAPC13	multimodal
NM_001242598	TMEM147	middle
NM_001242831	ELOVL5	included
NM_001242839	GUK1	included
NM_001242840	GUK1	included
NM_001242854	ARFIP2	multimodal
NM_001242891	CSDE1	excluded
NM_001242918	ZFAND6	multimodal
NM_001243131	RPL13	excluded
NM_001243252	EFHD1	included
NM_001243646	CD2BP2	excluded
NM_001243719	RAB6A	excluded
NM_001243799	TSC22D1	excluded
NM_001243885	TOB1	excluded
NM_001243892	TPD52L2	middle
NM_001244572	BID	excluded
NM_001244644	CHMP2B	excluded
NM_001244701	ZFP36L1	excluded
NM_001244812	FOXP1	excluded
NM_001251918	RAP1B	excluded
NM_001252053	PCMT1	multimodal
NM_001252273	DIPK1A	included
NM_001253379	RPL15	excluded
NM_001253764	SRA1	excluded
NM_001253790	SMIM22	excluded
NM_001253816	SLC52A2	multimodal
NM_001254738	RND3	multimodal
NM_001256165	TMCO1	excluded
NM_001256281	RAB34	multimodal
NM_001256302	ETF1	excluded
NM_001256355	UBE2L3	excluded
NM_001256399	ELOVL1	multimodal
NM_001256534	SLC25A1	multimodal
NM_001256580	RPL10	excluded
NM_001256721	CCT4	excluded
NM_001256829	TMEM265	excluded
NM_001256879	POLD2	multimodal
NM_001256891	SRI	multimodal
NM_001257096	PAX1	multimodal
NM_001257335	ATP5F1A	excluded
NM_001257401	CD63	excluded
NM_001258028	TKT	excluded
NM_001258289	SELENBP1	multimodal
NM_001258320	TP53I11	multimodal
NM_001258384	IDH3B	included
NM_001258423	SMS	excluded
NM_001260506	RPS3	excluded
NM_001260507	RPS3	excluded
NM_001261400	PSMD9	excluded
NM_001261401	TSN	excluded
NM_001261466	ADAM15	included
NM_001265591	RTN3	middle
NM_001265603	MORF4L1	excluded
NM_001267061	SNX17	multimodal
NM_001267558	PDCD6	multimodal
NM_001267699	RPS3A	included
NM_001267700	PHB2	included
NM_001267708	ZNF706	excluded
NM_001267809	ILF2	excluded
NM_001267817	OSTC	excluded
NM_001270399	TUBA1A	multimodal
NM_001270439	ARPC5	excluded
NM_001270447	ACADVL	included
NM_001270481	PSMB6	included
NM_001270482	PSMD11	excluded
NM_001270491	RPL13A	excluded
NM_001270550	MDK	excluded
NM_001270552	MDK	excluded
NM_001270837	CRIP2	included
NM_001270896	TRAPPC3	excluded
NM_001270987	LTBR	multimodal
NM_001271213	SQOR	multimodal
NM_001271641	MTCH1	included
NM_001271734	COPZ1	multimodal
NM_001271742	CSNK1A1	excluded
NM_001271849	CDK2AP2	middle
NM_001271878	KHDRBS1	excluded
NM_001271918	SEC11A	middle
NM_001271957	SLC39A1	included
NM_001271970	HSP90AB1	included
NM_001271998	RAB4A	excluded
NM_001272007	ISCA2	excluded
NM_001272038	RAB13	multimodal
NM_001272053	MRFAP1	included
NM_001272083	SHISA5	multimodal
NM_001277199	CNIH4	excluded
NM_001277224	TAGLN2	included
NM_001277764	CIB1	excluded
NM_001278191	TPM3	excluded
NM_001278197	CDK5RAP3	multimodal
NM_001278243	ZFAND5	excluded
NM_001278244	ZFAND5	excluded
NM_001278263	CARHSP1	excluded
NM_001278265	CARHSP1	excluded
NM_001278346	PHYKPL	multimodal
NM_001278379	ARL6IP4	multimodal
NM_001278555	UBE2E3	multimodal
NM_001278556	ARPC3	excluded
NM_001278645	NDUFB9	middle
NM_001278656	SNRPD3	excluded
NM_001278700	POLR2H	included
NM_001278712	ATG3	multimodal
NM_001278946	SEC13	included
NM_001279360	LYPLA1	excluded
NM_001280	CIRBP	included
NM_001280557	SLC39A4	included
NM_001280789	SURF4	included
NM_001280790	SURF4	included
NM_001281297	EDF1	included
NM_001281427	DCTN3	multimodal
NM_001281434	ZNHIT3	multimodal
NM_001281437	ADRM1	middle
NM_001281447	GTF2IRD2	excluded
NM_001281474	MLPH	excluded
NM_001281496	PHB	excluded
NM_001281497	PHB	excluded
NM_001281512	HADHB	multimodal
NM_001281529	PSME1	included
NM_001281532	PSENEN	excluded
NM_001281716	UBB	included
NM_001281719	UBB	included
NM_001282150	VPS29	excluded
NM_001282161	UBE2A	excluded
NM_001282162	CAPZB	excluded
NM_001282205	SIGMAR1	multimodal
NM_001282234	PSMA6	included
NM_001282385	CSNK2B	multimodal
NM_001282404	MDH2	excluded
NM_001282576	UBE2V1	multimodal
NM_001282580	UBE2V1	multimodal
NM_001282604	PTGES3	middle
NM_001282606	TMBIM4	excluded
NM_001282621	PGRMC1	bimodal
NM_001282625	LMNA	multimodal
NM_001282652	STIP1	middle
NM_001282674	BEX3	middle
NM_001283037	RTF2	excluded
NM_001284239	SARAF	multimodal
NM_001284367	NDUFB8	multimodal
NM_001284368	NDUFB8	multimodal
NM_001284502	NUBP2	multimodal
NM_001285450	PDXDC1	included
NM_001286056	CNN3	excluded
NM_001286084	TRMT112	included
NM_001286086	C11orf98	included
NM_001286110	CLN3	excluded
NM_001286272	TPT1	excluded
NM_001286416	SUMO3	middle
NM_001286435	NME4	multimodal
NM_001286436	NME4	multimodal
NM_001286487	TMEM87A	excluded
NM_001286706	UFM1	excluded
NM_001286773	OCIAD2	excluded
NM_001286789	CBR1	multimodal
NM_001286836	CBWD5	multimodal
NM_001287032	STOML2	excluded
NM_001287392	COMMD6	excluded
NM_001287434	CCND3	multimodal
NM_001287588	SLC50A1	middle
NM_001287592	SLC50A1	middle
NM_001287744	FDFT1	excluded
NM_001287747	FDFT1	excluded
NM_001288	CLIC1	middle
NM_001288565	TMEM9	middle
NM_001288610	JPT1	excluded
NM_001288659	METTL9	middle
NM_001288660	METTL9	middle
NM_001288756	BABAM1	excluded
NM_001288978	XRCC6	included
NM_001289414	ANAPC11	excluded
NM_001289797	PCBD1	included
NM_001289910	IDH2	included
NM_001290135	EI24	excluded
NM_001290193	MYADM	excluded
NM_001290309	CTNNA1	multimodal
NM_001290553	ADIPOR1	excluded
NM_001290557	ADIPOR1	excluded
NM_001291304	NDUFA5	excluded
NM_001291428	BAX	multimodal
NM_001291430	BAX	included
NM_001291431	BAX	excluded
NM_001291739	CD24	excluded
NM_001291916	SNRPD1	excluded
NM_001293179	PRSS23	excluded
NM_001293180	PRSS23	excluded
NM_001293213	TUBB	multimodal
NM_001293214	TUBB	excluded
NM_001294332	SDHA	excluded
NM_001294333	ATP6V0B	included
NM_001297418	HNRNPM	multimodal
NM_001297566	UQCRH	included
NM_001297723	C1orf43	included
NM_001297738	TBCA	included
NM_001300	KLF6	excluded
NM_001300795	UBE2D3	excluded
NM_001300796	RAN	excluded
NM_001300829	CIRBP	excluded
NM_001300888	PBDC1	excluded
NM_001300900	MRPS34	multimodal
NM_001300901	TCEAL4	excluded
NM_001300902	CD55	multimodal
NM_001300914	DNAJB1	multimodal
NM_001301020	OAZ1	excluded
NM_001301068	ARL1	excluded
NM_001301076	AP2S1	included
NM_001301241	ARHGDIA	included
NM_001301242	ARHGDIA	included
NM_001301834	C12orf57	included
NM_001301836	C12orf57	included
NM_001302545	AAMP	excluded
NM_001303007	DDAH2	multimodal
NM_001303048	MYL12A	middle
NM_001303060	TMED4	included
NM_001303062	TMED4	middle
NM_001303114	TUBA1C	multimodal
NM_001303117	TUBA1C	excluded
NM_001303235	ISG20	excluded
NM_001303247	WDR61	excluded
NM_001303499	CNN2	multimodal
NM_001303507	PPP4C	multimodal
NM_001304451	PGD	excluded
NM_001305	CLDN4	included
NM_001305043	TMEM59	excluded
NM_001305066	TMEM59	included
NM_001305626	CALM2	middle
NM_001305841	TCEAL4	excluded
NM_001306	CLDN3	excluded
NM_001306153	CCT5	excluded
NM_001306154	CCT5	excluded
NM_001307	CLDN7	excluded
NM_001308036	NCBP2	multimodal
NM_001308043	CFLAR	multimodal
NM_001308205	SSR3	excluded
NM_001308396	MRPL43	multimodal
NM_001308824	SF3B1	multimodal
NM_001309861	GNAS	excluded
NM_001309883	GNAS	included
NM_001310315	TUBB2A	multimodal
NM_001310326	UBE2T	excluded
NM_001311	CRIP1	excluded
NM_001311203	CLTA	included
NM_001311311	VKORC1	included
NM_001312653	HIST1H2BK	included
NM_001313858	ARL6IP1	multimodal
NM_001313893	HMGB1	excluded
NM_001313932	CAPZB	included
NM_001313941	RHOA	middle
NM_001313993	IGFBP2	middle
NM_001314039	DNAJA1	excluded
NM_001316374	MDH1	multimodal
NM_001317007	S100A16	included
NM_001317008	S100A16	included
NM_001317111	MOB1A	excluded
NM_001317167	SNRPG	excluded
NM_001317231	MTCH2	excluded
NM_001317783	TSTA3	included
NM_001317856	EIF3CL	excluded
NM_001317897	SMIM14	excluded
NM_001317956	IDI1	excluded
NM_001317968	ARRDC1	included
NM_001317981	RPL26L1	excluded
NM_001318015	ZDHHC12	included
NM_001318016	ZDHHC12	included
NM_001318020	ZDHHC12	multimodal
NM_001318051	NDUFS4	excluded
NM_001318058	DMAC1	excluded
NM_001318188	HNRNPK	excluded
NM_001318236	LAMTOR4	included
NM_001318237	LAMTOR4	included
NM_001318252	C7orf50	multimodal
NM_001318485	MRPL20	included
NM_001318494	TRAPPC4	excluded
NM_001318526	TRAPPC2L	excluded
NM_001318527	TRAPPC2L	excluded
NM_001318770	MRPL14	excluded
NM_001318788	COX4I1	included
NM_001318794	COX4I1	included
NM_001318797	COX4I1	excluded
NM_001318825	HEXA	excluded
NM_001318848	CNPY3	included
NM_001318863	DGUOK	multimodal
NM_001318942	MEA1	included
NM_001319036	COX7A2L	included
NM_001319040	COX7A2L	included
NM_001319068	ITGB1BP1	excluded
NM_001319081	HMGA1	multimodal
NM_001319086	RUVBL1	included
NM_001319137	CTSH	excluded
NM_001319140	AK2	excluded
NM_001319157	DYNLRB1	included
NM_001319184	RNPEP	multimodal
NM_001319188	HDGF	included
NM_001319236	RPL34	excluded
NM_001319991	SUPT5H	multimodal
NM_001320194	NACA	included
NM_001320327	CHCHD2	included
NM_001320397	PCNP	excluded
NM_001320523	SYNGR2	middle
NM_001320597	DDX5	excluded
NM_001320628	BOLA2-SMG1P6	middle
NM_001320651	U2AF1L5	multimodal
NM_001320778	SCAMP2	multimodal
NM_001320904	DTYMK	multimodal
NM_001320913	FXYD5	excluded
NM_001320929	GTF2A2	excluded
NM_001320979	AKR7A2	excluded
NM_001321017	UBA52	excluded
NM_001321021	UBA52	excluded
NM_001321170	TECR	middle
NM_001321185	TMC6	multimodal
NM_001321335	SELENOH	excluded
NM_001321367	CD99	included
NM_001321369	CD99	excluded
NM_001321421	ARHGDIB	multimodal
NM_001321423	ARHGDIB	multimodal
NM_001321441	AHSA1	multimodal
NM_001321648	NUDT5	excluded
NM_001321688	BZW1	excluded
NM_001321690	BZW1	middle
NM_001321704	RPS9	middle
NM_001321845	COMMD4	multimodal
NM_001321970	MRPS11	excluded
NM_001321973	MRPS11	included
NM_001321974	MRPS11	bimodal
NM_001322033	ACTN4	middle
NM_001322086	AHCY	multimodal
NM_001322959	TMEM183A	excluded
NM_001322970	OAT	multimodal
NM_001323011	PMVK	multimodal
NM_001323027	IQCG	multimodal
NM_001323030	IQCG	included
NM_001323069	PFKP	multimodal
NM_001323073	PFKP	multimodal
NM_001323423	RBM39	excluded
NM_001323960	RBCK1	included
NM_001323985	CTNNA1	multimodal
NM_001324303	RPN2	multimodal
NM_001324306	RPN2	multimodal
NM_001329402	VMP1	excluded
NM_001329417	TMA7	excluded
NM_001329502	GPX1	bimodal
NM_001329503	GPX1	bimodal
NM_001329559	TIMM50	excluded
NM_001329570	NIPSNAP3A	excluded
NM_001329609	ARL16	multimodal
NM_001329678	PAXX	multimodal
NM_001329722	TMEM54	multimodal
NM_001329752	FAM136A	excluded
NM_001329921	CALM3	excluded
NM_001330176	COPRS	multimodal
NM_001330200	RPL19	middle
NM_001330206	MIEN1	excluded
NM_001330269	ATP5MC2	included
NM_001330284	MZT2B	included
NM_001330286	DUT	excluded
NM_001330312	CD9	excluded
NM_001330337	CBWD2	excluded
NM_001330393	VEZF1	excluded
NM_001330421	CYB561	multimodal
NM_001330426	NAGK	excluded
NM_001330469	COPE	excluded
NM_001330536	CENPX	multimodal
NM_001330692	PSMD4	included
NM_001330985	TMEM230	multimodal
NM_001344	DAD1	included
NM_001346500	CD164	excluded
NM_001346663	TK1	multimodal
NM_001346879	POLR2H	included
NM_001347892	TMX2	included
NM_001348065	DCTN2	excluded
NM_001348129	NBDY	excluded
NM_001348133	CCNI	excluded
NM_001348957	SMIM26	included
NM_001348958	SMIM26	excluded
NM_001350968	C7orf50	multimodal
NM_001351263	TSPAN15	excluded
NM_001352773	JUP	middle
NM_001352777	JUP	included
NM_001353053	GSN	excluded
NM_001353264	FAM49B	excluded
NM_001353337	ANKRD36B	excluded
NM_001353402	NDUFAF8	multimodal
NM_001354457	PLPP5	multimodal
NM_001354845	CCNB1	excluded
NM_001354928	VCP	excluded
NM_001355006	NPM1	multimodal
NM_001355009	NPM1	included
NM_001355019	PPP2CA	excluded
NM_001355401	NPIPB12	multimodal
NM_001357	DHX9	excluded
NM_001357943	GAPDH	included
NM_001359651	PEF1	multimodal
NM_001362531	CKB	multimodal
NM_001362750	AHCY	excluded
NM_001362896	PUF60	included
NM_001363000	THEM6	included
NM_001363602	NDUFS7	included
NM_001363669	CALM1	excluded
NM_001363673	ELOF1	multimodal
NM_001363688	NPC2	included
NM_001363695	PPT1	middle
NM_001363697	RPL28	bimodal
NM_001363735	TMED3	included
NM_001363778	SYNGR2	included
NM_001363785	EIF3L	excluded
NM_001363810	VMA21	excluded
NM_001363848	TK1	multimodal
NM_001363860	RPS16	excluded
NM_001363872	PLSCR1	excluded
NM_001363881	HMCES	multimodal
NM_001363887	LRCH3	included
NM_001363963	DERL1	excluded
NM_001363994	CANX	middle
NM_001364007	NOTCH2NLB	excluded
NM_001364008	NOTCH2NLB	excluded
NM_001364013	NOTCH2NLC	excluded
NM_001364126	CLTB	multimodal
NM_001364127	CLTB	included
NM_001364239	HNRNPH1	multimodal
NM_001364683	TPM3	included
NM_001365304	LOC112694756	included
NM_001365717	LRCH3	included
NM_001365719	LRCH3	included
NM_001365754	MIF4GD	included
NM_001365761	MICOS13	included
NM_001365774	ALDH9A1	multimodal
NM_001365776	TPM1	multimodal
NM_001365777	TPM1	multimodal
NM_001365782	TPM1	multimodal
NM_001366292	COX7A2	excluded
NM_001366293	COX7A2	included
NM_001366481	RPL7L1	excluded
NM_001366643	SAP18	excluded
NM_001366994	IFI27	middle
NM_001367837	TPM4	included
NM_001369744	ITGB1BP1	excluded
NM_001369751	SNRPD2	included
NM_001369752	SNRPD2	included
NM_001369859	PTP4A2	excluded
NM_001370177	NA	excluded
NM_001370340	NA	excluded
NM_001370345	NA	excluded
NM_001371394	NA	excluded
NM_001371720	NA	multimodal
NM_001371734	NA	excluded
NM_001374178	NA	included
NM_001374326	NA	excluded
NM_001374407	NA	included
NM_001374512	NA	middle
NM_001374593	NA	excluded
NM_001375354	NA	multimodal
NM_001375991	NA	included
NM_001376560	NA	multimodal
NM_001376902	NA	multimodal
NM_001377298	NA	excluded
NM_001377300	NA	included
NM_001377527	NA	multimodal
NM_001378351	NA	multimodal
NM_001378451	NA	excluded
NM_001378495	NA	multimodal
NM_001379043	NA	excluded
NM_001379366	NA	included
NM_001381852	NA	included
NM_001381911	NA	excluded
NM_001381943	NA	middle
NM_001382003	NA	included
NM_001382225	NA	included
NM_001382293	NA	included
NM_001382294	NA	middle
NM_001382365	NA	multimodal
NM_001382366	NA	multimodal
NM_001382542	NA	multimodal
NM_001382727	NA	middle
NM_001382730	NA	middle
NM_001384280	NA	included
NM_001384714	NA	excluded
NM_001384982	NA	multimodal
NM_001385254	NA	excluded
NM_001385265	NA	excluded
NM_001385266	NA	excluded
NM_001386740	NA	excluded
NM_001386875	NA	excluded
NM_001387651	NA	multimodal
NM_001387846	NA	excluded
NM_001388314	NA	included
NM_001388318	NA	excluded
NM_001393653	NA	excluded
NM_001393915	NA	excluded
NM_001393919	NA	excluded
NM_001394000	NA	excluded
NM_001394149	NA	excluded
NM_001394674	NA	excluded
NM_001394769	NA	multimodal
NM_001398	ECH1	included
NM_001402	EEF1A1	excluded
NM_001404	EEF1G	included
NM_001418	EIF4G2	included
NM_001424	EMP2	excluded
NM_001487	BLOC1S1	excluded
NM_001537	HSBP1	excluded
NM_001540	HSPB1	middle
NM_001554	CCN1	excluded
NM_001618	PARP1	excluded
NM_001636	SLC25A6	middle
NM_001647	APOD	excluded
NM_001658	ARF1	included
NM_001660	ARF4	included
NM_001662	ARF5	included
NM_001675	ATF4	included
NM_001677	ATP1B1	excluded
NM_001679	ATP1B3	excluded
NM_001686	ATP5F1B	included
NM_001687	ATP5F1D	included
NM_001688	ATP5PB	excluded
NM_001731	BTG1	excluded
NM_001743	CALM2	middle
NM_001757	CBR1	excluded
NM_001777	CD47	excluded
NM_001791	CDC42	excluded
NM_001826	CKS1B	included
NM_001827	CKS2	multimodal
NM_001862	COX5B	excluded
NM_001866	COX7B	excluded
NM_001867	COX7C	excluded
NM_001878	CRABP2	included
NM_001909	CTSD	middle
NM_001914	CYB5A	excluded
NM_001916	CYC1	included
NM_001961	EEF2	middle
NM_001967	EIF4A2	middle
NM_001985	ETFB	multimodal
NM_002014	FKBP4	excluded
NM_002085	GPX4	included
NM_002086	GRB2	multimodal
NM_002087	GRN	included
NM_002094	GSPT1	excluded
NM_002097	GTF3A	multimodal
NM_002106	H2AFZ	included
NM_002116	HLA-A	multimodal
NM_002117	HLA-C	excluded
NM_002136	HNRNPA1	excluded
NM_002139	RBMX	middle
NM_002156	HSPD1	multimodal
NM_002157	HSPE1	excluded
NM_002165	ID1	included
NM_002166	ID2	excluded
NM_002167	ID3	included
NM_002168	IDH2	excluded
NM_002228	JUN	excluded
NM_002266	KPNA2	excluded
NM_002273	KRT8	included
NM_002276	KRT19	included
NM_002295	RPSA	excluded
NM_002306	LGALS3	middle
NM_002337	LRPAP1	excluded
NM_002354	EPCAM	middle
NM_002437	MPV17	multimodal
NM_002455	MTX1	included
NM_002488	NDUFA2	excluded
NM_002489	NDUFA4	excluded
NM_002490	NDUFA6	excluded
NM_002491	NDUFB3	included
NM_002493	NDUFB6	excluded
NM_002534	OAS1	multimodal
NM_002537	OAZ2	multimodal
NM_002567	PEBP1	excluded
NM_002568	PABPC1	excluded
NM_002573	PAFAH1B3	included
NM_002629	PGAM1	included
NM_002635	SLC25A3	excluded
NM_002695	POLR2E	excluded
NM_002696	POLR2G	multimodal
NM_002710	PPP1CC	multimodal
NM_002773	PRSS8	included
NM_002787	PSMA2	excluded
NM_002790	PSMA5	excluded
NM_002791	PSMA6	included
NM_002792	PSMA7	middle
NM_002793	PSMB1	included
NM_002798	PSMB6	included
NM_002806	PSMC6	excluded
NM_002808	PSMD2	included
NM_002810	PSMD4	multimodal
NM_002811	PSMD7	excluded
NM_002812	PSMD8	middle
NM_002815	PSMD11	excluded
NM_002823	PTMA	middle
NM_002904	NELFE	excluded
NM_002939	RNH1	included
NM_002947	RPA3	excluded
NM_002948	RPL15	excluded
NM_002949	MRPL12	multimodal
NM_002950	RPN1	excluded
NM_002952	RPS2	middle
NM_002965	S100A9	included
NM_002966	S100A10	middle
NM_002970	SAT1	included
NM_002997	SDC1	middle
NM_002999	SDC4	multimodal
NM_003000	SDHB	excluded
NM_003001	SDHC	middle
NM_003009	SELENOW	middle
NM_003016	SRSF2	included
NM_003017	SRSF3	excluded
NM_003022	SH3BGRL	multimodal
NM_003079	SMARCE1	excluded
NM_003090	SNRPA1	excluded
NM_003091	SNRPB	included
NM_003093	SNRPC	middle
NM_003094	SNRPE	excluded
NM_003107	SOX4	excluded
NM_003129	SQLE	excluded
NM_003130	SRI	excluded
NM_003133	SRP9	multimodal
NM_003134	SRP14	excluded
NM_003145	SSR2	included
NM_003168	SUPT4H1	excluded
NM_003172	SURF1	excluded
NM_003187	TAF9	included
NM_003217	TMBIM6	included
NM_003258	TK1	included
NM_003276	TMPO	multimodal
NM_003295	TPT1	excluded
NM_003299	HSP90B1	middle
NM_003311	PHLDA2	excluded
NM_003321	TUFM	excluded
NM_003329	TXN	excluded
NM_003337	UBE2B	excluded
NM_003348	UBE2N	excluded
NM_003352	SUMO1	excluded
NM_003366	UQCRC2	excluded
NM_003374	VDAC1	included
NM_003379	EZR	multimodal
NM_003407	ZFP36	included
NM_003457	ZNF207	excluded
NM_003491	NAA10	excluded
NM_003495	HIST1H4I	included
NM_003516	HIST2H2AA3	included
NM_003610	RAE1	excluded
NM_003641	IFITM1	multimodal
NM_003676	DEGS1	excluded
NM_003689	AKR7A2	included
NM_003731	SSNA1	included
NM_003754	EIF3F	excluded
NM_003756	EIF3H	excluded
NM_003757	EIF3I	middle
NM_003761	VAMP8	included
NM_003776	MRPL40	included
NM_003779	B4GALT3	multimodal
NM_003792	EDF1	included
NM_003795	SNX3	excluded
NM_003801	GPAA1	included
NM_003827	NAPA	middle
NM_003860	BANF1	middle
NM_003863	DPM2	multimodal
NM_003897	IER3	multimodal
NM_003915	CPNE1	multimodal
NM_003932	ST13	excluded
NM_003945	ATP6V0E1	excluded
NM_003973	RPL14	excluded
NM_003979	GPRC5A	excluded
NM_004034	ANXA7	excluded
NM_004048	B2M	middle
NM_004074	COX8A	included
NM_004077	CS	multimodal
NM_004083	DDIT3	multimodal
NM_004092	ECHS1	multimodal
NM_004095	EIF4EBP1	included
NM_004125	DNAJC25-GNG10	excluded
NM_004148	NINJ1	included
NM_004161	RAB1A	excluded
NM_004223	UBE2L6	multimodal
NM_004231	ATP6V1F	included
NM_004252	SLC9A3R1	included
NM_004255	COX5A	excluded
NM_004261	SELENOF	excluded
NM_004280	EEF1E1	excluded
NM_004295	TRAF4	excluded
NM_004322	BAD	multimodal
NM_004331	BNIP3L	excluded
NM_004335	BST2	middle
NM_004339	PTTG1IP	multimodal
NM_004343	CALR	multimodal
NM_004373	COX6A1	included
NM_004374	COX6C	excluded
NM_004393	DAG1	excluded
NM_004394	DAP	multimodal
NM_004417	DUSP1	multimodal
NM_004433	ELF3	excluded
NM_004450	ERH	included
NM_004493	HSD17B10	multimodal
NM_004499	HNRNPAB	multimodal
NM_004501	HNRNPU	excluded
NM_004508	IDI1	excluded
NM_004528	MGST3	excluded
NM_004537	NAP1L1	excluded
NM_004542	NDUFA3	excluded
NM_004544	NDUFA10	excluded
NM_004547	NDUFB4	excluded
NM_004549	NDUFC2	excluded
NM_004551	NDUFS3	multimodal
NM_004593	TRA2B	excluded
NM_004607	TBCA	excluded
NM_004637	RAB7A	multimodal
NM_004663	RAB11A	excluded
NM_004691	ATP6V0D1	excluded
NM_004699	FAM50A	excluded
NM_004708	PDCD5	excluded
NM_004710	SYNGR2	included
NM_004712	HGS	multimodal
NM_004713	NEMF	multimodal
NM_004718	COX7A2L	excluded
NM_004800	TM9SF2	excluded
NM_004862	LITAF	middle
NM_004888	ATP6V1G1	excluded
NM_004905	PRDX6	excluded
NM_004925	AQP3	multimodal
NM_004926	ZFP36L1	excluded
NM_004960	FUS	multimodal
NM_004965	HMGN1	included
NM_005001	NDUFA7	excluded
NM_005002	NDUFA9	excluded
NM_005008	SNU13	excluded
NM_005015	OXA1L	excluded
NM_005022	PFN1	middle
NM_005034	POLR2K	excluded
NM_005101	ISG15	included
NM_005105	RBM8A	excluded
NM_005168	RND3	multimodal
NM_005216	DDOST	excluded
NM_005252	FOS	excluded
NM_005313	PDIA3	excluded
NM_005319	HIST1H1C	multimodal
NM_005324	H3F3B	excluded
NM_005327	HADH	multimodal
NM_005340	HINT1	excluded
NM_005347	HSPA5	excluded
NM_005381	NCL	excluded
NM_005439	MLF2	included
NM_005494	DNAJB6	multimodal
NM_005506	SCARB2	excluded
NM_005507	CFL1	middle
NM_005514	HLA-B	multimodal
NM_005516	HLA-E	excluded
NM_005517	HMGN2	excluded
NM_005524	HES1	middle
NM_005556	KRT7	included
NM_005567	LGALS3BP	included
NM_005600	NIT1	multimodal
NM_005614	RHEB	excluded
NM_005620	S100A11	middle
NM_005669	REEP5	excluded
NM_005698	SCAMP3	middle
NM_005720	ARPC1B	multimodal
NM_005721	ACTR3	excluded
NM_005722	ACTR2	excluded
NM_005724	TSPAN3	excluded
NM_005729	PPIF	excluded
NM_005762	TRIM28	excluded
NM_005765	ATP6AP2	middle
NM_005776	CNIH1	excluded
NM_005782	ALYREF	multimodal
NM_005787	ALG3	excluded
NM_005789	PSME3	excluded
NM_005796	NUTF2	excluded
NM_005801	EIF1	excluded
NM_005803	FLOT1	excluded
NM_005805	PSMD14	middle
NM_005809	PRDX2	middle
NM_005817	PLIN3	middle
NM_005827	SLC35B1	excluded
NM_005837	POP7	multimodal
NM_005849	IGSF6	included
NM_005856	RAMP3	included
NM_005870	SAP18	excluded
NM_005911	MAT2A	multimodal
NM_005953	MT2A	multimodal
NM_005971	FXYD3	excluded
NM_005980	S100P	included
NM_005998	CCT3	included
NM_006003	UQCRFS1	excluded
NM_006012	CLPP	excluded
NM_006013	RPL10	excluded
NM_006014	LAGE3	included
NM_006022	TSC22D1	excluded
NM_006082	TUBA1B	included
NM_006088	TUBB4B	included
NM_006156	NEDD8	included
NM_006164	NFE2L2	excluded
NM_006184	NUCB1	multimodal
NM_006191	PA2G4	excluded
NM_006192	PAX1	multimodal
NM_006223	PIN4	excluded
NM_006234	POLR2J	excluded
NM_006265	RAD21	multimodal
NM_006275	SRSF6	multimodal
NM_006304	SEM1	excluded
NM_006327	TIMM23	included
NM_006335	TIMM17A	middle
NM_006337	MCRS1	multimodal
NM_006339	HMG20B	middle
NM_006349	ZNHIT1	multimodal
NM_006356	ATP5PD	included
NM_006368	CREB3	multimodal
NM_006396	ZNRD2	excluded
NM_006401	ANP32B	excluded
NM_006407	ARL6IP5	excluded
NM_006408	AGR2	excluded
NM_006412	AGPAT2	multimodal
NM_006423	RABAC1	included
NM_006428	MRPL28	excluded
NM_006430	CCT4	excluded
NM_006431	CCT2	multimodal
NM_006432	NPC2	multimodal
NM_006435	IFITM2	included
NM_006443	DNPH1	multimodal
NM_006471	MYL12A	middle
NM_006476	ATP5MG	excluded
NM_006496	GNAI3	excluded
NM_006519	DYNLT1	multimodal
NM_006579	EBP	included
NM_006597	HSPA8	included
NM_006600	NUDC	excluded
NM_006622	PLK2	multimodal
NM_006636	MTHFD2	excluded
NM_006645	STARD10	included
NM_006694	JTB	excluded
NM_006708	GLO1	multimodal
NM_006713	SUB1	excluded
NM_006743	RBM3	excluded
NM_006761	YWHAE	excluded
NM_006793	PRDX3	excluded
NM_006795	EHD1	excluded
NM_006801	KDELR1	excluded
NM_006808	SEC61B	multimodal
NM_006811	SERINC3	excluded
NM_006815	TMED2	multimodal
NM_006816	LMAN2	multimodal
NM_006826	YWHAQ	middle
NM_006827	TMED10	excluded
NM_006829	ADIRF	excluded
NM_006830	UQCR11	excluded
NM_006833	COPS6	excluded
NM_006854	KDELR2	excluded
NM_006870	DSTN	excluded
NM_006886	ATP5F1E	excluded
NM_006899	IDH3B	included
NM_006907	PYCR1	included
NM_006908	RAC1	excluded
NM_006923	SDF2	excluded
NM_006924	SRSF1	excluded
NM_006925	SRSF5	excluded
NM_006930	SKP1	excluded
NM_006937	SUMO2	excluded
NM_007006	NUDT21	excluded
NM_007033	RER1	excluded
NM_007065	CDC37	middle
NM_007099	ACP1	multimodal
NM_007104	RPL10A	middle
NM_007108	ELOB	excluded
NM_007178	STRAP	excluded
NM_007208	MRPL3	excluded
NM_007236	CHP1	multimodal
NM_007278	GABARAP	excluded
NM_007285	GABARAPL2	included
NM_007364	TMED3	included
NM_007367	RALY	excluded
NM_012203	GRHPR	included
NM_012319	SLC39A6	multimodal
NM_012321	LSM4	excluded
NM_012322	LSM5	excluded
NM_012325	MAPRE1	middle
NM_012391	SPDEF	included
NM_012394	PFDN2	middle
NM_012412	H2AFV	excluded
NM_012433	SF3B1	excluded
NM_012456	TIMM10	excluded
NM_012458	TIMM13	excluded
NM_012459	TIMM8B	multimodal
NM_012473	TXN2	excluded
NM_013238	DNAJC15	excluded
NM_013258	PYCARD	middle
NM_013336	SEC61A1	included
NM_013349	NENF	excluded
NM_013379	DPP7	multimodal
NM_013387	UQCR10	excluded
NM_013442	STOML2	excluded
NM_013995	LAMP2	included
NM_014041	SPCS1	excluded
NM_014046	MRPS18B	multimodal
NM_014047	C19orf53	excluded
NM_014050	MRPL42	excluded
NM_014060	MCTS1	excluded
NM_014077	FAM32A	multimodal
NM_014078	MRPL13	excluded
NM_014106	ZNF770	excluded
NM_014172	PHPT1	included
NM_014175	MRPL15	excluded
NM_014182	ORMDL2	excluded
NM_014187	TMEM208	included
NM_014188	SSU72	multimodal
NM_014206	TMEM258	excluded
NM_014220	TM4SF1	multimodal
NM_014222	NDUFA8	multimodal
NM_014225	PPP2R1A	excluded
NM_014248	RBX1	excluded
NM_014255	CNPY2	excluded
NM_014267	C11orf58	excluded
NM_014313	TMEM50A	excluded
NM_014330	PPP1R15A	included
NM_014335	EID1	excluded
NM_014341	MTCH1	included
NM_014367	FAM162A	excluded
NM_014380	BEX3	included
NM_014394	GHITM	excluded
NM_014399	TSPAN13	middle
NM_014402	UQCRQ	excluded
NM_014445	SERP1	excluded
NM_014455	RNF115	excluded
NM_014463	LSM3	excluded
NM_014501	UBE2S	excluded
NM_014604	TAX1BP3	multimodal
NM_014623	MEA1	included
NM_014624	S100A6	middle
NM_014713	LAPTM4A	middle
NM_014736	PCLAF	excluded
NM_014740	EIF4A3	excluded
NM_014752	SPCS2	excluded
NM_014765	TOMM20	excluded
NM_015051	ERP44	excluded
NM_015161	ARL6IP1	multimodal
NM_015388	YIPF3	multimodal
NM_015391	ANAPC13	multimodal
NM_015392	NPDC1	included
NM_015415	MPC2	excluded
NM_015497	TMEM87A	excluded
NM_015564	LRRTM2	included
NM_015584	POLDIP2	multimodal
NM_015702	MMADHC	excluded
NM_015853	UBXN1	included
NM_015871	ZNF593	multimodal
NM_015920	RPS27L	excluded
NM_015921	CUTA	excluded
NM_015932	POMP	excluded
NM_015933	TMA7	excluded
NM_015949	GET4	multimodal
NM_015966	ERGIC3	middle
NM_015971	MRPS7	included
NM_016002	SCCPDH	excluded
NM_016022	APH1A	included
NM_016038	SBDS	multimodal
NM_016039	RTRAF	excluded
NM_016047	SF3B6	multimodal
NM_016061	YPEL5	excluded
NM_016062	CIAO2B	multimodal
NM_016065	MRPS16	excluded
NM_016068	FIS1	excluded
NM_016070	MRPS23	excluded
NM_016079	CHMP3	excluded
NM_016085	ATRAID	included
NM_016100	NAA20	middle
NM_016127	SARAF	multimodal
NM_016131	RAB10	excluded
NM_016145	WDR83OS	multimodal
NM_016199	LSM7	middle
NM_016200	LSM8	excluded
NM_016208	VPS28	included
NM_016219	MAN1B1	multimodal
NM_016237	ANAPC5	excluded
NM_016275	SELENOT	excluded
NM_016283	AK6	excluded
NM_016286	DCXR	middle
NM_016311	ATP5IF1	multimodal
NM_016400	HYPK	excluded
NM_016404	TRMT112	included
NM_016406	UFC1	included
NM_016462	TMEM14C	included
NM_016470	OSER1	excluded
NM_016480	PAIP2	multimodal
NM_016491	MRPL37	multimodal
NM_016494	RNF181	excluded
NM_016497	MRPL51	excluded
NM_016504	MRPL27	included
NM_016520	C9orf78	excluded
NM_016565	COA4	multimodal
NM_016592	GNAS	excluded
NM_016639	TNFRSF12A	middle
NM_016641	GDE1	excluded
NM_016816	OAS1	multimodal
NM_017491	WDR1	multimodal
NM_017510	TMED9	excluded
NM_017528	BUD23	excluded
NM_017670	OTUB1	excluded
NM_017819	TRMT10C	excluded
NM_017823	DUSP23	included
NM_017841	SDHAF2	excluded
NM_017861	PIGX	excluded
NM_017866	TMEM70	excluded
NM_017896	GID8	excluded
NM_017907	LAMTOR1	middle
NM_017914	C19orf24	multimodal
NM_017924	C14orf119	excluded
NM_017971	MRPL20	included
NM_018049	PLEKHJ1	included
NM_018407	LAPTM4B	excluded
NM_018445	SELENOS	multimodal
NM_018453	EAPP	multimodal
NM_018462	BRK1	excluded
NM_018491	CBWD1	excluded
NM_018648	NOP10	included
NM_018670	MESP1	bimodal
NM_018683	RNF114	excluded
NM_018838	NDUFA12	included
NM_018946	NANS	middle
NM_018947	CYCS	excluded
NM_018997	MRPS21	excluded
NM_019026	TMCO1	excluded
NM_019037	EXOSC4	included
NM_019059	TOMM7	included
NM_019107	MYDGF	excluded
NM_019613	WDR45B	multimodal
NM_020154	EMC7	multimodal
NM_020202	NIT2	excluded
NM_020307	CCNL1	excluded
NM_020387	RAB25	included
NM_020529	NFKBIA	included
NM_020531	APMAP	included
NM_020532	RTN4	excluded
NM_020672	S100A14	included
NM_020791	TAOK1	excluded
NM_020992	PDLIM1	middle
NM_021009	UBC	included
NM_021029	RPL36A	excluded
NM_021034	IFITM3	middle
NM_021095	SLC5A6	multimodal
NM_021103	TMSB10	middle
NM_021104	RPL41	excluded
NM_021109	TMSB4X	included
NM_021128	POLR2L	excluded
NM_021129	PPA1	included
NM_021130	PPIA	excluded
NM_021173	POLD4	excluded
NM_021177	LSM2	multimodal
NM_021203	SRPRB	excluded
NM_021237	SELENOK	excluded
NM_021243	ABRACL	excluded
NM_021709	SIVA1	included
NM_021960	MCL1	multimodal
NM_021999	ITM2B	excluded
NM_022044	SDF2L1	multimodal
NM_022100	MRPS14	excluded
NM_022121	PERP	excluded
NM_022130	GOLPH3	excluded
NM_022488	ATG3	excluded
NM_022818	MAP1LC3B	excluded
NM_022873	IFI6	included
NM_022877	SMN2	multimodal
NM_023080	C8orf33	excluded
NM_023934	FUNDC2	excluded
NM_023935	DDRGK1	excluded
NM_023936	MRPS34	multimodal
NM_024026	MRPL57	excluded
NM_024038	TRIR	included
NM_024051	GGCT	included
NM_024071	ZFYVE21	included
NM_024092	TMEM109	multimodal
NM_024112	C9orf16	multimodal
NM_024348	DCTN3	multimodal
NM_024592	SRD5A3	excluded
NM_024613	PLEKHF2	excluded
NM_025124	TMEM134	excluded
NM_025146	NAA50	excluded
NM_030789	HM13	middle
NM_030811	MRPS26	included
NM_030916	NECTIN4	included
NM_030939	C6orf62	included
NM_030978	ARPC5L	excluded
NM_030981	RAB1B	included
NM_031243	HNRNPA2B1	excluded
NM_031263	HNRNPK	excluded
NM_031286	SH3BGRL3	included
NM_031287	SF3B5	multimodal
NM_031298	EMC6	multimodal
NM_031308	EPPK1	excluded
NM_031314	HNRNPC	excluded
NM_031370	HNRNPD	excluded
NM_031372	HNRNPDL	excluded
NM_031420	MRPL9	included
NM_031452	RAMAC	excluded
NM_031844	HNRNPU	excluded
NM_031903	MRPL32	excluded
NM_031991	PTBP1	multimodal
NM_032014	MRPS24	included
NM_032112	MRPL43	multimodal
NM_032193	RNASEH2C	excluded
NM_032231	CIAO2A	excluded
NM_032272	MAF1	multimodal
NM_032286	MED10	excluded
NM_032302	PSMG3	multimodal
NM_032306	ALKBH7	excluded
NM_032338	LLPH	excluded
NM_032339	MIEN1	excluded
NM_032350	C7orf50	multimodal
NM_032353	VPS25	multimodal
NM_032360	ACBD6	multimodal
NM_032361	THOC3	excluded
NM_032366	METTL26	multimodal
NM_032412	CYSTM1	excluded
NM_032476	MRPS6	included
NM_032477	MRPL41	included
NM_032479	MRPL36	included
NM_032574	DPY30	multimodal
NM_032656	DHX37	multimodal
NM_032667	BSCL2	middle
NM_032731	TXNDC17	excluded
NM_032773	LRCH3	included
NM_032901	COX14	included
NM_032906	PYURF	included
NM_032989	BAD	multimodal
NM_033318	SMDT1	excluded
NM_033362	MRPS12	excluded
NM_033363	MRPS12	included
NM_033504	TMEM54	multimodal
NM_033546	MYL12B	excluded
NM_033630	SCAND1	multimodal
NM_033643	RPL36	excluded
NM_033668	ITGB1	multimodal
NM_044472	CDC42	included
NM_052844	WDR34	included
NM_052850	GADD45GIP1	excluded
NM_052886	MAL2	multimodal
NM_052951	DNTTIP1	multimodal
NM_053050	MRPL53	included
NM_053056	CCND1	excluded
NM_053275	RPLP0	included
NM_054014	FKBP1A	included
NM_054016	SRSF10	excluded
NM_080593	HIST1H2BK	included
NM_080626	BRI3BP	included
NM_080648	APEX1	included
NM_080652	TMEM41A	excluded
NM_080821	FAM210B	excluded
NM_130786	A1BG	excluded
NM_133639	RHOV	multimodal
NM_134265	WSB1	excluded
NM_138288	SPTSSA	excluded
NM_138446	MALSU1	excluded
NM_138610	H2AFY	included
NM_138689	PPP1R14B	multimodal
NM_138764	BAX	multimodal
NM_138820	HIGD2A	included
NM_138924	GAMT	multimodal
NM_139062	CSNK1D	excluded
NM_139323	YWHAB	excluded
NM_144578	MAPK1IP1L	excluded
NM_144772	NAXE	excluded
NM_145169	SFT2D1	excluded
NM_145252	ZG16B	multimodal
NM_145330	MRPL33	multimodal
NM_145729	MRPL24	multimodal
NM_145792	MGST1	middle
NM_148912	ABHD11	included
NM_148919	PSMB8	multimodal
NM_148976	PSMA1	middle
NM_152285	ARRDC1	multimodal
NM_152685	SLC23A1	included
NM_152766	TMEM256	multimodal
NM_152862	ARPC2	excluded
NM_153001	PSMC4	excluded
NM_153200	EDF1	included
NM_153201	HSPA8	included
NM_153280	UBA1	multimodal
NM_153373	PHYKPL	multimodal
NM_153824	PYCR1	included
NM_170679	SKP1	excluded
NM_170708	LMNA	excluded
NM_170739	MRPL11	excluded
NM_172251	MRPL54	multimodal
NM_173614	NOMO2	multimodal
NM_174886	TGIF1	excluded
NM_174909	TMEM167A	excluded
NM_175732	PTPMT1	excluded
NM_175932	PSMD13	multimodal
NM_176783	PSME1	included
NM_177534	SULT1A1	excluded
NM_177542	SNRPD2	included
NM_177543	PLPP2	included
NM_177552	SULT1A3	excluded
NM_177925	H2AFJ	multimodal
NM_177983	PPM1G	included
NM_178190	ATP5IF1	included
NM_178191	ATP5IF1	included
NM_178578	PSMF1	excluded
NM_178582	HM13	included
NM_180982	MRPL52	excluded
NM_181462	MRPL55	included
NM_181466	EIF6	included
NM_181468	EIF6	included
NM_181528	NAA20	middle
NM_181652	PRDX5	multimodal
NM_181800	UBE2C	multimodal
NM_181836	TMED7	excluded
NM_181843	NUDT8	multimodal
NM_182649	PCNA	excluded
NM_182685	EFNA1	included
NM_182776	MCM7	multimodal
NM_182810	ATF4	included
NM_182917	EIF4G1	excluded
NM_183057	VPS28	included
NM_183237	RNF7	excluded
NM_183241	PAXX	multimodal
NM_183425	RBM38	multimodal
NM_184043	ALDOA	included
NM_194261	UBE2I	excluded
NM_194326	RPS19BP1	multimodal
NM_194434	VAPA	excluded
NM_197955	C15orf48	excluded
NM_197966	BID	excluded
NM_198057	TSC22D3	included
NM_198175	NME1	excluded
NM_198242	EIF4G1	excluded
NM_198426	CHMP2A	multimodal
NM_198536	TMEM205	included
NM_198590	BSG	included
NM_198591	BSG	included
NM_198883	MTX1	included
NM_198976	NELFCD	multimodal
NM_199074	NDUFAF3	excluded
NM_199184	DNPH1	included
NM_201384	PLEC	excluded
NM_201397	GPX1	bimodal
NM_201429	RTN3	middle
NM_203298	CHCHD1	excluded
NM_203401	STMN1	excluded
NM_203458	NOTCH2NLA	excluded
NM_203464	AK4	excluded
NM_206917	BEX3	excluded
NM_206918	DEGS2	excluded
NM_207047	ENSA	included
NM_207168	ENSA	included
NM_212460	ARL4A	excluded
NM_212552	BOLA3	excluded
NM_213725	RPLP1	excluded
NR_001317	HCG4B	included
NR_001434	HLA-H	included
NR_001445	RN7SK	multimodal
NR_002201	FTH1P3	middle
NR_002308	UQCRBP1	multimodal
NR_002315	H3F3AP4	excluded
NR_002453	SMG1P5	multimodal
NR_002454	LOC606724	included
NR_002556	LOC388242	multimodal
NR_002594	SLC7A5P2	included
NR_002715	RN7SL1	multimodal
NR_002985	SNORA58	included
NR_002988	SNORA74B	included
NR_003010	SCARNA12	included
NR_003015	SNORA53	included
NR_003189	SYS1-DBNDD2	included
NR_003225	LGALS3	middle
NR_003573	ANXA2P2	included
NR_003605	ZFAS1	excluded
NR_023358	SCARNA9L	included
NR_024206	CYTOR	multimodal
NR_024373	MIR4435-2HG	multimodal
NR_024454	NDUFB2-AS1	excluded
NR_024456	LOC100190986	middle
NR_024629	IDI2-AS1	included
NR_026712	RPL13AP5	included
NR_027155	SMG1P3	multimodal
NR_027168	SNHG29	multimodal
NR_027260	RN7SL2	multimodal
NR_027406	LOC100129034	included
NR_027418	LINC00674	excluded
NR_027645	ATP1A1-AS1	multimodal
NR_028052	NGRN	included
NR_028323	SLC5A6	bimodal
NR_028370	PCNA-AS1	middle
NR_028443	SLC25A5-AS1	excluded
NR_028510	TYRO3P	multimodal
NR_029378	LOC100289511	excluded
NR_029426	SMA4	multimodal
NR_029434	PSMA3-AS1	included
NR_031762	HCP5B	included
NR_033343	PSCA	multimodal
NR_034041	SRSF1	excluded
NR_034106	CRNDE	excluded
NR_037600	LINC01578	excluded
NR_037608	SLX1A-SULT1A3	excluded
NR_037609	SLX1B-SULT1A4	included
NR_037673	SERF2-C15ORF63	excluded
NR_037688	ACTG1	middle
NR_037717	RNASEK-C17orf49	multimodal
NR_037926	SENP3-EIF4A1	excluded
NR_037928	P2RX5-TAX1BP3	multimodal
NR_037969	SRD5A3-AS1	included
NR_038111	SNHG16	excluded
NR_038193	METTL23	multimodal
NR_038286	PSMD6-AS2	multimodal
NR_038322	MAP3K13	excluded
NR_038410	TSPOAP1-AS1	excluded
NR_038894	CBR3-AS1	included
NR_040049	SDCBP2-AS1	included
NR_045586	SRA1	excluded
NR_046413	POLD4	excluded
NR_046633	NUCB1-AS1	included
NR_046853	HM13-AS1	included
NR_049759	IFITM3	included
NR_051984	PRC1-AS1	included
NR_073084	CRIP2	included
NR_073412	TMEM134	multimodal
NR_073609	PDCD6	included
NR_077246	RPS14P3	multimodal
NR_102318	ACTR3	excluded
NR_102400	PYCARD-AS1	excluded
NR_102427	CIB1	included
NR_103560	GSN-AS1	included
NR_103819	SNRPD3	excluded
NR_104029	DGUOK-AS1	included
NR_104165	MDH2	included
NR_104454	TMEM14B	multimodal
NR_109828	PCBP2-OT1	included
NR_109875	LOC101927100	included
NR_109878	LINC01726	multimodal
NR_110009	ADNP-AS1	included
NR_110044	LOC101926943	multimodal
NR_110578	CSNK1D	excluded
NR_110730	PTOV1-AS2	included
NR_120608	TUBB	multimodal
NR_130143	LOC104968399	included
NR_132776	SNORA94	included
NR_133645	S100A16	included
NR_134538	C7orf50	included
NR_134671	TRAPPC2L	excluded
NR_134848	GAA	included
NR_134869	HEXA	included
NR_135305	SMG1P2	middle
NR_135587	DPY30	middle
NR_136278	LOC105375713	included
NR_136587	RBM39	included
NR_138060	ARL16	multimodal
NR_144447	ZNF8-ERVK3-1	included
NR_144567	MALAT1	included
NR_145425	RUSC1-AS1	included
NR_145721	SNORA74C-1	included
NR_145819	RNA45SN1	excluded
NR_145820	RNA18SN1	middle
NR_145822	RNA28SN1	multimodal
NR_146063	SMIM27	included
NR_146144	RNA45SN2	excluded
NR_146146	RNA18SN2	middle
NR_146148	RNA28SN2	multimodal
NR_146151	RNA45SN3	excluded
NR_146152	RNA18SN3	middle
NR_146154	RNA28SN3	multimodal
NR_146274	KRT7-AS	included
NR_146472	ELF3-AS1	included
NR_146967	C7orf50	multimodal
NR_147233	TPM1-AS	multimodal
NR_148712	ENOSF1	multimodal
NR_155756	TBCB	excluded
NR_157088	CLTB	multimodal
NR_157580	LOC440292	excluded
NR_158216	LOC105370687	excluded
NR_160308	GCNT7	included
NR_160400	TIMM8B	multimodal
NR_160950	SNHG32	excluded
NR_163478	NA	excluded
NR_163943	NA	excluded
NR_171558	NA	multimodal
NR_171559	NA	multimodal
NR_171562	NA	multimodal

## Sheet: SRP066632_SingleCTCs
APA_ID	Gene_Symbol	Modality
NM_000050	ASS1	multimodal
NM_000099	CST3	multimodal
NM_000100	CSTB	multimodal
NM_000101	CYBA	multimodal
NM_000146	FTL	included
NM_000269	NME1	excluded
NM_000270	PNP	included
NM_000291	PGK1	excluded
NM_000294	PHKG2	multimodal
NM_000310	PPT1	multimodal
NM_000365	TPI1	included
NM_000454	SOD1	multimodal
NM_000485	APRT	excluded
NM_000507	FBP1	multimodal
NM_000574	CD55	excluded
NM_000581	GPX1	included
NM_000700	ANXA1	multimodal
NM_000701	ATP1A1	multimodal
NM_000712	BLVRA	multimodal
NM_000713	BLVRB	multimodal
NM_000714	TSPO	included
NM_000754	COMT	excluded
NM_000801	FKBP1A	multimodal
NM_000852	GSTP1	included
NM_000903	NQO1	multimodal
NM_000918	P4HB	included
NM_000943	PPIC	multimodal
NM_000968	RPL4	excluded
NM_000971	RPL7	excluded
NM_000975	RPL11	excluded
NM_000977	RPL13	excluded
NM_000978	RPL23	excluded
NM_000981	RPL19	multimodal
NM_000983	RPL22	excluded
NM_000984	RPL23A	excluded
NM_000990	RPL27A	excluded
NM_000991	RPL28	excluded
NM_000992	RPL29	multimodal
NM_000993	RPL31	excluded
NM_000994	RPL32	excluded
NM_000996	RPL35A	excluded
NM_000997	RPL37	excluded
NM_000998	RPL37A	excluded
NM_001000	RPL39	included
NM_001001	RPL36AL	excluded
NM_001001392	CD44	excluded
NM_001001503	NDUFV3	excluded
NM_001001701	C4orf3	multimodal
NM_001002027	ATP5MC1	multimodal
NM_001002033	JPT1	multimodal
NM_001002248	ANAPC11	included
NM_001002258	ATP5MC3	excluded
NM_001002858	ANXA2	excluded
NM_001004333	RNASEK	included
NM_001005354	PRR13	included
NM_001005474	NFKBIZ	multimodal
NM_001005781	SUMO1	excluded
NM_001006941	ALG3	excluded
NM_001007	RPS4X	excluded
NM_001007070	SDCBP	included
NM_001007074	RPL32	excluded
NM_001007214	CACYBP	excluded
NM_001007565	TFG	included
NM_001008709	PPP1CA	included
NM_001009184	GRINA	excluded
NM_001009186	CCT6A	excluded
NM_001009570	CCT7	included
NM_001010	RPS6	excluded
NM_001010858	RNF187	excluded
NM_001010974	BCAS4	multimodal
NM_001010989	HERPUD1	excluded
NM_001011537	FYTTD1	multimodal
NM_001012	RPS8	excluded
NM_001012270	BIRC5	excluded
NM_001012300	MCRS1	multimodal
NM_001012664	SLC3A2	included
NM_001013653	LRRC26	multimodal
NM_001014763	ETFB	multimodal
NM_001014990	MRPL22	excluded
NM_001017390	SULT1A4	included
NM_001017963	HSP90AA1	excluded
NM_001017998	GNG10	multimodal
NM_001018004	TPM1	included
NM_001018067	SERBP1	excluded
NM_001018136	NME1-NME2	included
NM_001018837	HAX1	multimodal
NM_001019	RPS15A	excluded
NM_001022	RPS19	excluded
NM_001023	RPS20	included
NM_001024212	S100A13	multimodal
NM_001024844	CD82	excluded
NM_001024957	BRMS1	multimodal
NM_001024960	ARPC4	included
NM_001025	RPS23	excluded
NM_001025071	RPS14	excluded
NM_001025205	AP2M1	included
NM_001029	RPS26	excluded
NM_001030018	APRT	multimodal
NM_001030287	ATF3	multimodal
NM_001031	RPS28	excluded
NM_001031677	RAB24	excluded
NM_001031684	SRSF7	excluded
NM_001031711	ERGIC1	multimodal
NM_001032409	OAS1	excluded
NM_001033056	GLUL	excluded
NM_001033503	SAR1B	excluded
NM_001034	RRM2	excluded
NM_001034025	ERP29	excluded
NM_001035005	C18orf32	excluded
NM_001035513	SDHC	excluded
NM_001037164	ARL4A	multimodal
NM_001037494	DYNLL1	included
NM_001037811	HSD17B10	multimodal
NM_001039457	ATP6V0B	included
NM_001039490	CD151	multimodal
NM_001039577	CCNL2	multimodal
NM_001039712	DEDD	multimodal
NM_001040431	COA3	multimodal
NM_001040619	ATF3	excluded
NM_001040649	ACP1	included
NM_001040874	HIST2H2AA4	included
NM_001042432	CLN3	multimodal
NM_001042462	TRAPPC5	excluded
NM_001042465	PSAP	included
NM_001042472	ABHD12	multimodal
NM_001042483	NUPR1	excluded
NM_001042679	RHOC	included
NM_001043352	TPM3	excluded
NM_001048249	SMIM15	multimodal
NM_001069	TUBB2A	multimodal
NM_001070	TUBG1	multimodal
NM_001077399	PNKD	multimodal
NM_001077628	APH1A	multimodal
NM_001078166	SRSF1	multimodal
NM_001079862	DBI	included
NM_001085365	MZT2A	multimodal
NM_001085372	UQCC3	excluded
NM_001086521	NDUFAF8	multimodal
NM_001089591	UQCRHL	multimodal
NM_001098208	HNRNPF	included
NM_001098398	COPA	excluded
NM_001098616	C1orf43	included
NM_001098673	ATG101	multimodal
NM_001098786	HILPDA	multimodal
NM_001099406	SLC39A6	multimodal
NM_001099639	ZNF146	multimodal
NM_001099645	RPL22L1	excluded
NM_001099668	HIGD1A	excluded
NM_001099693	RPL31	included
NM_001101	ACTB	included
NM_001102667	PSMA4	multimodal
NM_001102668	PSMA4	excluded
NM_001105204	RUSC1	multimodal
NM_001105205	RUSC1	multimodal
NM_001110503	TMEM87A	bimodal
NM_001113205	TSTD1	included
NM_001122955	BSCL2	included
NM_001123355	PPP6C	excluded
NM_001123377	PARK7	excluded
NM_001126051	HDGF	included
NM_001127192	CNBP	excluded
NM_001127198	TMC6	excluded
NM_001127213	LY6E	multimodal
NM_001127223	CD59	excluded
NM_001127393	ATP5MPL	excluded
NM_001127394	TSEN15	multimodal
NM_001127889	SPG21	multimodal
NM_001128203	PLAAT3	excluded
NM_001128914	PCBP2	included
NM_001130004	ACTN1	multimodal
NM_001130674	CALU	multimodal
NM_001130678	EIF4E	excluded
NM_001130689	HMGB2	excluded
NM_001130725	PSMB5	included
NM_001130929	STMP1	excluded
NM_001134321	RTL8A	included
NM_001134484	TOMM5	multimodal
NM_001134493	TOMM6	included
NM_001135239	LDHA	excluded
NM_001135255	RBBP4	multimodal
NM_001135592	RPS27A	excluded
NM_001135694	VDAC3	included
NM_001135702	YWHAZ	excluded
NM_001135998	NDUFB11	multimodal
NM_001136008	FXYD3	included
NM_001136010	FXYD3	included
NM_001136016	APP	multimodal
NM_001136017	CCND3	included
NM_001136134	RPL28	excluded
NM_001136136	RPL28	included
NM_001136137	RPL28	included
NM_001136232	SEC13	included
NM_001136268	DAZAP2	included
NM_001136275	AKIRIN1	multimodal
NM_001136497	BTF3L4	excluded
NM_001136498	CISD3	excluded
NM_001137553	LRRFIP1	multimodal
NM_001139457	BCAP31	included
NM_001142298	SQSTM1	included
NM_001142418	MORF4L2	included
NM_001142625	RAB34	multimodal
NM_001142627	SEC61A2	included
NM_001142648	SAR1A	excluded
NM_001142798	C17orf49	multimodal
NM_001142799	C17orf49	multimodal
NM_001143681	GSTK1	multimodal
NM_001143760	EIF5A	multimodal
NM_001143780	SLC25A39	included
NM_001143841	TMEM106C	multimodal
NM_001143937	PSMA1	included
NM_001143985	BANF1	multimodal
NM_001144831	PHB2	included
NM_001144932	PSMB5	included
NM_001144943	RAB34	multimodal
NM_001144944	MYL12B	multimodal
NM_001145145	SLC1A5	multimodal
NM_001145155	NR2F2	excluded
NM_001145156	NR2F2	excluded
NM_001145160	TPM4	included
NM_001145355	CBWD1	multimodal
NM_001145410	NONO	multimodal
NM_001145412	NFE2L2	multimodal
NM_001145713	SAE1	excluded
NM_001145940	PAFAH1B3	multimodal
NM_001146068	CAPN2	included
NM_001146178	IP6K2	multimodal
NM_001146191	MPZL1	excluded
NM_001146333	SUMF2	multimodal
NM_001151	SLC25A4	excluded
NM_001152	SLC25A5	included
NM_001154	ANXA5	multimodal
NM_001159287	TPI1	included
NM_001162407	CLK1	multimodal
NM_001163424	COPS9	included
NM_001164189	PLIN3	multimodal
NM_001165415	LDHA	excluded
NM_001165931	RRM2	excluded
NM_001166103	SPINT2	included
NM_001166237	GSDMD	multimodal
NM_001168331	NDUFB4	included
NM_001170406	CDK1	multimodal
NM_001170634	FUS	excluded
NM_001170795	ATRAID	multimodal
NM_001171508	MCFD2	excluded
NM_001171511	MCFD2	excluded
NM_001172415	BAG1	excluded
NM_001172695	TSFM	excluded
NM_001172705	EIF4G2	included
NM_001173128	YTHDF2	multimodal
NM_001177	ARL1	excluded
NM_001177643	DAG1	excluded
NM_001178087	SERF1B	multimodal
NM_001183	ATP6AP1	included
NM_001184722	GPI	excluded
NM_001184730	PIGT	multimodal
NM_001184740	CTTN	included
NM_001184761	CLTA	included
NM_001184823	VDAC2	multimodal
NM_001184891	FLAD1	multimodal
NM_001184979	NDUFS5	included
NM_001185	AZGP1	multimodal
NM_001185012	NDUFA2	multimodal
NM_001185077	ARHGDIA	multimodal
NM_001185092	NIT1	multimodal
NM_001190329	ATP5MC3	excluded
NM_001190452	MTRNR2L1	excluded
NM_001190470	MTRNR2L2	multimodal
NM_001190472	MTRNR2L3	multimodal
NM_001190702	MTRNR2L8	excluded
NM_001190706	MTRNR2L9	excluded
NM_001190864	MRPS35	multimodal
NM_001190991	CNPY2	multimodal
NM_001190996	ARPC1A	included
NM_001191003	GSTO1	multimodal
NM_001193557	ENY2	excluded
NM_001193572	CSRP1	multimodal
NM_001193655	CYBC1	multimodal
NM_001195056	DDIT3	included
NM_001195427	SRSF2	included
NM_001195478	TFG	included
NM_001195536	CHMP5	excluded
NM_001197139	DBNDD2	multimodal
NM_001198569	ATP6V0C	multimodal
NM_001198719	RBBP7	excluded
NM_001198846	RBM14-RBM4	included
NM_001198868	CAPN1	multimodal
NM_001199038	SERINC2	multimodal
NM_001199142	EIF3C	excluded
NM_001199355	RPL17-C18orf32	excluded
NM_001199535	TGIF2-RAB5IF	included
NM_001199780	PSMB2	excluded
NM_001199786	FKBP1A	multimodal
NM_001199851	DAP3	excluded
NM_001199876	SERF2	excluded
NM_001199877	SERF2	excluded
NM_001199954	ACTG1	included
NM_001199957	NDUFB5	excluded
NM_001199975	UQCRB	multimodal
NM_001201483	ENO1	included
NM_001202547	SYNJ2BP-COX16	excluded
NM_001204054	NDUFC2	excluded
NM_001204064	CHURC1	excluded
NM_001204082	MICOS10	excluded
NM_001204193	SRP19	excluded
NM_001204196	SRP19	excluded
NM_001204199	SRP19	included
NM_001204861	ELOC	excluded
NM_001206486	ATF3	excluded
NM_001206799	PKM	included
NM_001206836	RAB11A	excluded
NM_001207000	HNRNPDL	excluded
NM_001212	C1QBP	multimodal
NM_001220777	CDKN1A	multimodal
NM_001236	CBR3	multimodal
NM_001242375	ANAPC13	multimodal
NM_001242598	TMEM147	multimodal
NM_001242831	ELOVL5	multimodal
NM_001242839	GUK1	included
NM_001242840	GUK1	included
NM_001242854	ARFIP2	multimodal
NM_001242891	CSDE1	multimodal
NM_001242918	ZFAND6	included
NM_001243131	RPL13	excluded
NM_001243252	EFHD1	multimodal
NM_001243646	CD2BP2	excluded
NM_001243719	RAB6A	multimodal
NM_001243799	TSC22D1	excluded
NM_001243885	TOB1	multimodal
NM_001243892	TPD52L2	multimodal
NM_001244572	BID	excluded
NM_001244644	CHMP2B	multimodal
NM_001244701	ZFP36L1	multimodal
NM_001244812	FOXP1	excluded
NM_001251918	RAP1B	excluded
NM_001252053	PCMT1	included
NM_001252273	DIPK1A	included
NM_001253379	RPL15	excluded
NM_001253764	SRA1	excluded
NM_001253790	SMIM22	excluded
NM_001253816	SLC52A2	bimodal
NM_001254738	RND3	multimodal
NM_001256165	TMCO1	excluded
NM_001256281	RAB34	multimodal
NM_001256302	ETF1	multimodal
NM_001256355	UBE2L3	multimodal
NM_001256399	ELOVL1	multimodal
NM_001256534	SLC25A1	multimodal
NM_001256580	RPL10	excluded
NM_001256721	CCT4	excluded
NM_001256829	TMEM265	excluded
NM_001256879	POLD2	multimodal
NM_001256891	SRI	included
NM_001257096	PAX1	multimodal
NM_001257335	ATP5F1A	excluded
NM_001257401	CD63	excluded
NM_001258028	TKT	excluded
NM_001258289	SELENBP1	included
NM_001258320	TP53I11	multimodal
NM_001258384	IDH3B	bimodal
NM_001258423	SMS	multimodal
NM_001260506	RPS3	excluded
NM_001260507	RPS3	excluded
NM_001261400	PSMD9	excluded
NM_001261401	TSN	multimodal
NM_001261466	ADAM15	multimodal
NM_001265591	RTN3	multimodal
NM_001265603	MORF4L1	excluded
NM_001267061	SNX17	multimodal
NM_001267558	PDCD6	included
NM_001267699	RPS3A	included
NM_001267700	PHB2	included
NM_001267708	ZNF706	excluded
NM_001267809	ILF2	multimodal
NM_001267817	OSTC	multimodal
NM_001270399	TUBA1A	multimodal
NM_001270439	ARPC5	excluded
NM_001270447	ACADVL	included
NM_001270481	PSMB6	included
NM_001270482	PSMD11	excluded
NM_001270491	RPL13A	multimodal
NM_001270550	MDK	multimodal
NM_001270552	MDK	multimodal
NM_001270837	CRIP2	included
NM_001270896	TRAPPC3	multimodal
NM_001270987	LTBR	multimodal
NM_001271213	SQOR	multimodal
NM_001271641	MTCH1	included
NM_001271734	COPZ1	multimodal
NM_001271742	CSNK1A1	multimodal
NM_001271849	CDK2AP2	multimodal
NM_001271878	KHDRBS1	multimodal
NM_001271918	SEC11A	multimodal
NM_001271957	SLC39A1	multimodal
NM_001271970	HSP90AB1	included
NM_001271998	RAB4A	multimodal
NM_001272007	ISCA2	excluded
NM_001272038	RAB13	multimodal
NM_001272053	MRFAP1	included
NM_001272083	SHISA5	multimodal
NM_001277199	CNIH4	excluded
NM_001277224	TAGLN2	included
NM_001277764	CIB1	excluded
NM_001278191	TPM3	excluded
NM_001278197	CDK5RAP3	multimodal
NM_001278243	ZFAND5	excluded
NM_001278244	ZFAND5	excluded
NM_001278263	CARHSP1	excluded
NM_001278265	CARHSP1	excluded
NM_001278346	PHYKPL	bimodal
NM_001278379	ARL6IP4	multimodal
NM_001278555	UBE2E3	multimodal
NM_001278556	ARPC3	multimodal
NM_001278645	NDUFB9	included
NM_001278656	SNRPD3	excluded
NM_001278700	POLR2H	multimodal
NM_001278712	ATG3	multimodal
NM_001278946	SEC13	included
NM_001279360	LYPLA1	multimodal
NM_001280	CIRBP	included
NM_001280557	SLC39A4	included
NM_001280789	SURF4	multimodal
NM_001280790	SURF4	multimodal
NM_001281297	EDF1	included
NM_001281427	DCTN3	included
NM_001281434	ZNHIT3	included
NM_001281437	ADRM1	included
NM_001281447	GTF2IRD2	excluded
NM_001281474	MLPH	excluded
NM_001281496	PHB	excluded
NM_001281497	PHB	excluded
NM_001281512	HADHB	included
NM_001281529	PSME1	included
NM_001281532	PSENEN	excluded
NM_001281716	UBB	included
NM_001281719	UBB	included
NM_001282150	VPS29	excluded
NM_001282161	UBE2A	multimodal
NM_001282162	CAPZB	multimodal
NM_001282205	SIGMAR1	multimodal
NM_001282234	PSMA6	included
NM_001282385	CSNK2B	multimodal
NM_001282404	MDH2	excluded
NM_001282576	UBE2V1	multimodal
NM_001282580	UBE2V1	included
NM_001282604	PTGES3	included
NM_001282606	TMBIM4	multimodal
NM_001282621	PGRMC1	included
NM_001282625	LMNA	included
NM_001282652	STIP1	middle
NM_001282674	BEX3	multimodal
NM_001283037	RTF2	excluded
NM_001284239	SARAF	multimodal
NM_001284367	NDUFB8	multimodal
NM_001284368	NDUFB8	multimodal
NM_001284502	NUBP2	multimodal
NM_001285450	PDXDC1	multimodal
NM_001286056	CNN3	multimodal
NM_001286084	TRMT112	included
NM_001286086	C11orf98	multimodal
NM_001286110	CLN3	excluded
NM_001286272	TPT1	excluded
NM_001286416	SUMO3	multimodal
NM_001286435	NME4	included
NM_001286436	NME4	included
NM_001286487	TMEM87A	multimodal
NM_001286706	UFM1	multimodal
NM_001286773	OCIAD2	excluded
NM_001286789	CBR1	multimodal
NM_001286836	CBWD5	multimodal
NM_001287032	STOML2	multimodal
NM_001287392	COMMD6	excluded
NM_001287434	CCND3	included
NM_001287588	SLC50A1	included
NM_001287592	SLC50A1	included
NM_001287744	FDFT1	excluded
NM_001287747	FDFT1	excluded
NM_001288	CLIC1	included
NM_001288565	TMEM9	multimodal
NM_001288610	JPT1	multimodal
NM_001288659	METTL9	multimodal
NM_001288660	METTL9	multimodal
NM_001288756	BABAM1	multimodal
NM_001288978	XRCC6	included
NM_001289414	ANAPC11	excluded
NM_001289797	PCBD1	multimodal
NM_001289910	IDH2	multimodal
NM_001290135	EI24	multimodal
NM_001290193	MYADM	multimodal
NM_001290309	CTNNA1	multimodal
NM_001290553	ADIPOR1	included
NM_001290557	ADIPOR1	included
NM_001291304	NDUFA5	excluded
NM_001291428	BAX	included
NM_001291430	BAX	included
NM_001291431	BAX	included
NM_001291739	CD24	multimodal
NM_001291916	SNRPD1	excluded
NM_001293179	PRSS23	excluded
NM_001293180	PRSS23	excluded
NM_001293213	TUBB	multimodal
NM_001293214	TUBB	multimodal
NM_001294332	SDHA	excluded
NM_001294333	ATP6V0B	included
NM_001297418	HNRNPM	multimodal
NM_001297566	UQCRH	included
NM_001297723	C1orf43	included
NM_001297738	TBCA	included
NM_001300	KLF6	multimodal
NM_001300795	UBE2D3	multimodal
NM_001300796	RAN	excluded
NM_001300829	CIRBP	excluded
NM_001300888	PBDC1	multimodal
NM_001300900	MRPS34	multimodal
NM_001300901	TCEAL4	multimodal
NM_001300902	CD55	included
NM_001300914	DNAJB1	multimodal
NM_001301020	OAZ1	multimodal
NM_001301068	ARL1	excluded
NM_001301076	AP2S1	included
NM_001301241	ARHGDIA	multimodal
NM_001301242	ARHGDIA	multimodal
NM_001301834	C12orf57	included
NM_001301836	C12orf57	included
NM_001302545	AAMP	multimodal
NM_001303007	DDAH2	included
NM_001303048	MYL12A	included
NM_001303060	TMED4	multimodal
NM_001303062	TMED4	multimodal
NM_001303114	TUBA1C	multimodal
NM_001303117	TUBA1C	excluded
NM_001303235	ISG20	excluded
NM_001303247	WDR61	multimodal
NM_001303499	CNN2	included
NM_001303507	PPP4C	included
NM_001304451	PGD	excluded
NM_001305	CLDN4	multimodal
NM_001305043	TMEM59	excluded
NM_001305066	TMEM59	included
NM_001305626	CALM2	included
NM_001305841	TCEAL4	multimodal
NM_001306	CLDN3	multimodal
NM_001306153	CCT5	excluded
NM_001306154	CCT5	excluded
NM_001307	CLDN7	excluded
NM_001308036	NCBP2	multimodal
NM_001308043	CFLAR	included
NM_001308205	SSR3	excluded
NM_001308396	MRPL43	multimodal
NM_001308824	SF3B1	multimodal
NM_001309861	GNAS	included
NM_001309883	GNAS	included
NM_001310315	TUBB2A	multimodal
NM_001310326	UBE2T	multimodal
NM_001311	CRIP1	excluded
NM_001311203	CLTA	included
NM_001311311	VKORC1	included
NM_001312653	HIST1H2BK	included
NM_001313858	ARL6IP1	multimodal
NM_001313893	HMGB1	excluded
NM_001313932	CAPZB	included
NM_001313941	RHOA	included
NM_001313993	IGFBP2	multimodal
NM_001314039	DNAJA1	multimodal
NM_001316374	MDH1	multimodal
NM_001317007	S100A16	included
NM_001317008	S100A16	included
NM_001317111	MOB1A	multimodal
NM_001317167	SNRPG	excluded
NM_001317231	MTCH2	excluded
NM_001317783	TSTA3	multimodal
NM_001317856	EIF3CL	excluded
NM_001317897	SMIM14	excluded
NM_001317956	IDI1	excluded
NM_001317968	ARRDC1	bimodal
NM_001317981	RPL26L1	multimodal
NM_001318015	ZDHHC12	multimodal
NM_001318016	ZDHHC12	multimodal
NM_001318020	ZDHHC12	multimodal
NM_001318051	NDUFS4	multimodal
NM_001318058	DMAC1	excluded
NM_001318188	HNRNPK	multimodal
NM_001318236	LAMTOR4	included
NM_001318237	LAMTOR4	included
NM_001318252	C7orf50	included
NM_001318485	MRPL20	multimodal
NM_001318494	TRAPPC4	excluded
NM_001318526	TRAPPC2L	excluded
NM_001318527	TRAPPC2L	excluded
NM_001318770	MRPL14	multimodal
NM_001318788	COX4I1	included
NM_001318794	COX4I1	included
NM_001318797	COX4I1	multimodal
NM_001318825	HEXA	excluded
NM_001318848	CNPY3	included
NM_001318863	DGUOK	multimodal
NM_001318942	MEA1	included
NM_001319036	COX7A2L	included
NM_001319040	COX7A2L	included
NM_001319068	ITGB1BP1	multimodal
NM_001319081	HMGA1	multimodal
NM_001319086	RUVBL1	multimodal
NM_001319137	CTSH	excluded
NM_001319140	AK2	excluded
NM_001319157	DYNLRB1	multimodal
NM_001319184	RNPEP	multimodal
NM_001319188	HDGF	included
NM_001319236	RPL34	excluded
NM_001319991	SUPT5H	multimodal
NM_001320194	NACA	included
NM_001320327	CHCHD2	included
NM_001320397	PCNP	multimodal
NM_001320523	SYNGR2	multimodal
NM_001320597	DDX5	multimodal
NM_001320628	BOLA2-SMG1P6	multimodal
NM_001320651	U2AF1L5	multimodal
NM_001320778	SCAMP2	multimodal
NM_001320904	DTYMK	multimodal
NM_001320913	FXYD5	multimodal
NM_001320929	GTF2A2	excluded
NM_001320979	AKR7A2	excluded
NM_001321017	UBA52	excluded
NM_001321021	UBA52	excluded
NM_001321170	TECR	multimodal
NM_001321185	TMC6	multimodal
NM_001321335	SELENOH	excluded
NM_001321367	CD99	included
NM_001321369	CD99	included
NM_001321421	ARHGDIB	included
NM_001321423	ARHGDIB	included
NM_001321441	AHSA1	multimodal
NM_001321648	NUDT5	excluded
NM_001321688	BZW1	excluded
NM_001321690	BZW1	multimodal
NM_001321704	RPS9	middle
NM_001321845	COMMD4	multimodal
NM_001321970	MRPS11	excluded
NM_001321973	MRPS11	multimodal
NM_001321974	MRPS11	multimodal
NM_001322033	ACTN4	multimodal
NM_001322086	AHCY	bimodal
NM_001322959	TMEM183A	excluded
NM_001322970	OAT	multimodal
NM_001323011	PMVK	multimodal
NM_001323027	IQCG	included
NM_001323030	IQCG	included
NM_001323069	PFKP	multimodal
NM_001323073	PFKP	multimodal
NM_001323423	RBM39	excluded
NM_001323960	RBCK1	multimodal
NM_001323985	CTNNA1	multimodal
NM_001324303	RPN2	multimodal
NM_001324306	RPN2	multimodal
NM_001329402	VMP1	multimodal
NM_001329417	TMA7	excluded
NM_001329502	GPX1	included
NM_001329503	GPX1	included
NM_001329559	TIMM50	excluded
NM_001329570	NIPSNAP3A	multimodal
NM_001329609	ARL16	multimodal
NM_001329678	PAXX	multimodal
NM_001329722	TMEM54	multimodal
NM_001329752	FAM136A	multimodal
NM_001329921	CALM3	excluded
NM_001330176	COPRS	multimodal
NM_001330200	RPL19	multimodal
NM_001330206	MIEN1	excluded
NM_001330269	ATP5MC2	included
NM_001330284	MZT2B	bimodal
NM_001330286	DUT	excluded
NM_001330312	CD9	included
NM_001330337	CBWD2	excluded
NM_001330393	VEZF1	multimodal
NM_001330421	CYB561	multimodal
NM_001330426	NAGK	excluded
NM_001330469	COPE	multimodal
NM_001330536	CENPX	multimodal
NM_001330692	PSMD4	included
NM_001330985	TMEM230	included
NM_001344	DAD1	included
NM_001346500	CD164	multimodal
NM_001346663	TK1	multimodal
NM_001346879	POLR2H	multimodal
NM_001347892	TMX2	multimodal
NM_001348065	DCTN2	multimodal
NM_001348129	NBDY	excluded
NM_001348133	CCNI	multimodal
NM_001348957	SMIM26	included
NM_001348958	SMIM26	multimodal
NM_001350968	C7orf50	included
NM_001351263	TSPAN15	multimodal
NM_001352773	JUP	multimodal
NM_001352777	JUP	multimodal
NM_001353053	GSN	multimodal
NM_001353264	FAM49B	excluded
NM_001353337	ANKRD36B	multimodal
NM_001353402	NDUFAF8	multimodal
NM_001354457	PLPP5	included
NM_001354845	CCNB1	multimodal
NM_001354928	VCP	multimodal
NM_001355006	NPM1	bimodal
NM_001355009	NPM1	multimodal
NM_001355019	PPP2CA	multimodal
NM_001355401	NPIPB12	multimodal
NM_001357	DHX9	multimodal
NM_001357943	GAPDH	included
NM_001359651	PEF1	multimodal
NM_001362531	CKB	multimodal
NM_001362750	AHCY	multimodal
NM_001362896	PUF60	included
NM_001363000	THEM6	multimodal
NM_001363602	NDUFS7	included
NM_001363669	CALM1	excluded
NM_001363673	ELOF1	multimodal
NM_001363688	NPC2	included
NM_001363695	PPT1	multimodal
NM_001363697	RPL28	bimodal
NM_001363735	TMED3	bimodal
NM_001363778	SYNGR2	bimodal
NM_001363785	EIF3L	excluded
NM_001363810	VMA21	excluded
NM_001363848	TK1	multimodal
NM_001363860	RPS16	excluded
NM_001363872	PLSCR1	excluded
NM_001363881	HMCES	multimodal
NM_001363887	LRCH3	included
NM_001363963	DERL1	multimodal
NM_001363994	CANX	included
NM_001364007	NOTCH2NLB	multimodal
NM_001364008	NOTCH2NLB	multimodal
NM_001364013	NOTCH2NLC	multimodal
NM_001364126	CLTB	multimodal
NM_001364127	CLTB	bimodal
NM_001364239	HNRNPH1	bimodal
NM_001364683	TPM3	included
NM_001365304	LOC112694756	included
NM_001365717	LRCH3	included
NM_001365719	LRCH3	included
NM_001365754	MIF4GD	multimodal
NM_001365761	MICOS13	included
NM_001365774	ALDH9A1	multimodal
NM_001365776	TPM1	included
NM_001365777	TPM1	included
NM_001365782	TPM1	included
NM_001366292	COX7A2	excluded
NM_001366293	COX7A2	included
NM_001366481	RPL7L1	multimodal
NM_001366643	SAP18	excluded
NM_001366994	IFI27	multimodal
NM_001367837	TPM4	included
NM_001369744	ITGB1BP1	multimodal
NM_001369751	SNRPD2	included
NM_001369752	SNRPD2	included
NM_001369859	PTP4A2	excluded
NM_001370177	NA	multimodal
NM_001370340	NA	excluded
NM_001370345	NA	excluded
NM_001371394	NA	excluded
NM_001371720	NA	multimodal
NM_001371734	NA	multimodal
NM_001374178	NA	included
NM_001374326	NA	multimodal
NM_001374407	NA	included
NM_001374512	NA	multimodal
NM_001374593	NA	excluded
NM_001375354	NA	multimodal
NM_001375991	NA	included
NM_001376560	NA	multimodal
NM_001376902	NA	multimodal
NM_001377298	NA	multimodal
NM_001377300	NA	included
NM_001377527	NA	included
NM_001378351	NA	multimodal
NM_001378451	NA	multimodal
NM_001378495	NA	excluded
NM_001379043	NA	multimodal
NM_001379366	NA	multimodal
NM_001381852	NA	bimodal
NM_001381911	NA	multimodal
NM_001381943	NA	included
NM_001382003	NA	included
NM_001382225	NA	included
NM_001382293	NA	included
NM_001382294	NA	included
NM_001382365	NA	included
NM_001382366	NA	included
NM_001382542	NA	multimodal
NM_001382727	NA	multimodal
NM_001382730	NA	multimodal
NM_001384280	NA	multimodal
NM_001384714	NA	excluded
NM_001384982	NA	included
NM_001385254	NA	multimodal
NM_001385265	NA	multimodal
NM_001385266	NA	multimodal
NM_001386740	NA	excluded
NM_001386875	NA	excluded
NM_001387651	NA	multimodal
NM_001387846	NA	excluded
NM_001388314	NA	included
NM_001388318	NA	excluded
NM_001393653	NA	middle
NM_001393915	NA	multimodal
NM_001393919	NA	multimodal
NM_001394000	NA	multimodal
NM_001394149	NA	excluded
NM_001394674	NA	multimodal
NM_001394769	NA	multimodal
NM_001398	ECH1	included
NM_001402	EEF1A1	excluded
NM_001404	EEF1G	included
NM_001418	EIF4G2	included
NM_001424	EMP2	excluded
NM_001487	BLOC1S1	multimodal
NM_001537	HSBP1	excluded
NM_001540	HSPB1	included
NM_001554	CCN1	multimodal
NM_001618	PARP1	excluded
NM_001636	SLC25A6	multimodal
NM_001647	APOD	multimodal
NM_001658	ARF1	included
NM_001660	ARF4	included
NM_001662	ARF5	included
NM_001675	ATF4	included
NM_001677	ATP1B1	multimodal
NM_001679	ATP1B3	excluded
NM_001686	ATP5F1B	included
NM_001687	ATP5F1D	included
NM_001688	ATP5PB	excluded
NM_001731	BTG1	excluded
NM_001743	CALM2	included
NM_001757	CBR1	multimodal
NM_001777	CD47	excluded
NM_001791	CDC42	excluded
NM_001826	CKS1B	included
NM_001827	CKS2	multimodal
NM_001862	COX5B	excluded
NM_001866	COX7B	excluded
NM_001867	COX7C	excluded
NM_001878	CRABP2	bimodal
NM_001909	CTSD	included
NM_001914	CYB5A	excluded
NM_001916	CYC1	multimodal
NM_001961	EEF2	multimodal
NM_001967	EIF4A2	included
NM_001985	ETFB	multimodal
NM_002014	FKBP4	excluded
NM_002085	GPX4	included
NM_002086	GRB2	multimodal
NM_002087	GRN	included
NM_002094	GSPT1	excluded
NM_002097	GTF3A	multimodal
NM_002106	H2AFZ	included
NM_002116	HLA-A	multimodal
NM_002117	HLA-C	multimodal
NM_002136	HNRNPA1	multimodal
NM_002139	RBMX	multimodal
NM_002156	HSPD1	multimodal
NM_002157	HSPE1	excluded
NM_002165	ID1	multimodal
NM_002166	ID2	multimodal
NM_002167	ID3	multimodal
NM_002168	IDH2	excluded
NM_002228	JUN	multimodal
NM_002266	KPNA2	multimodal
NM_002273	KRT8	included
NM_002276	KRT19	included
NM_002295	RPSA	excluded
NM_002306	LGALS3	multimodal
NM_002337	LRPAP1	excluded
NM_002354	EPCAM	multimodal
NM_002437	MPV17	multimodal
NM_002455	MTX1	multimodal
NM_002488	NDUFA2	multimodal
NM_002489	NDUFA4	excluded
NM_002490	NDUFA6	excluded
NM_002491	NDUFB3	included
NM_002493	NDUFB6	excluded
NM_002534	OAS1	multimodal
NM_002537	OAZ2	multimodal
NM_002567	PEBP1	multimodal
NM_002568	PABPC1	included
NM_002573	PAFAH1B3	multimodal
NM_002629	PGAM1	included
NM_002635	SLC25A3	excluded
NM_002695	POLR2E	multimodal
NM_002696	POLR2G	included
NM_002710	PPP1CC	multimodal
NM_002773	PRSS8	multimodal
NM_002787	PSMA2	excluded
NM_002790	PSMA5	excluded
NM_002791	PSMA6	included
NM_002792	PSMA7	included
NM_002793	PSMB1	included
NM_002798	PSMB6	included
NM_002806	PSMC6	excluded
NM_002808	PSMD2	included
NM_002810	PSMD4	multimodal
NM_002811	PSMD7	multimodal
NM_002812	PSMD8	multimodal
NM_002815	PSMD11	excluded
NM_002823	PTMA	bimodal
NM_002904	NELFE	excluded
NM_002939	RNH1	included
NM_002947	RPA3	excluded
NM_002948	RPL15	excluded
NM_002949	MRPL12	multimodal
NM_002950	RPN1	multimodal
NM_002952	RPS2	included
NM_002965	S100A9	multimodal
NM_002966	S100A10	multimodal
NM_002970	SAT1	included
NM_002997	SDC1	multimodal
NM_002999	SDC4	multimodal
NM_003000	SDHB	multimodal
NM_003001	SDHC	multimodal
NM_003009	SELENOW	included
NM_003016	SRSF2	included
NM_003017	SRSF3	excluded
NM_003022	SH3BGRL	included
NM_003079	SMARCE1	excluded
NM_003090	SNRPA1	multimodal
NM_003091	SNRPB	included
NM_003093	SNRPC	multimodal
NM_003094	SNRPE	excluded
NM_003107	SOX4	excluded
NM_003129	SQLE	multimodal
NM_003130	SRI	excluded
NM_003133	SRP9	included
NM_003134	SRP14	excluded
NM_003145	SSR2	included
NM_003168	SUPT4H1	multimodal
NM_003172	SURF1	excluded
NM_003187	TAF9	included
NM_003217	TMBIM6	multimodal
NM_003258	TK1	multimodal
NM_003276	TMPO	multimodal
NM_003295	TPT1	excluded
NM_003299	HSP90B1	multimodal
NM_003311	PHLDA2	excluded
NM_003321	TUFM	excluded
NM_003329	TXN	excluded
NM_003337	UBE2B	excluded
NM_003348	UBE2N	excluded
NM_003352	SUMO1	excluded
NM_003366	UQCRC2	excluded
NM_003374	VDAC1	multimodal
NM_003379	EZR	multimodal
NM_003407	ZFP36	included
NM_003457	ZNF207	excluded
NM_003491	NAA10	excluded
NM_003495	HIST1H4I	included
NM_003516	HIST2H2AA3	included
NM_003610	RAE1	multimodal
NM_003641	IFITM1	multimodal
NM_003676	DEGS1	multimodal
NM_003689	AKR7A2	multimodal
NM_003731	SSNA1	bimodal
NM_003754	EIF3F	excluded
NM_003756	EIF3H	excluded
NM_003757	EIF3I	multimodal
NM_003761	VAMP8	included
NM_003776	MRPL40	multimodal
NM_003779	B4GALT3	multimodal
NM_003792	EDF1	included
NM_003795	SNX3	excluded
NM_003801	GPAA1	bimodal
NM_003827	NAPA	multimodal
NM_003860	BANF1	multimodal
NM_003863	DPM2	bimodal
NM_003897	IER3	multimodal
NM_003915	CPNE1	included
NM_003932	ST13	multimodal
NM_003945	ATP6V0E1	excluded
NM_003973	RPL14	excluded
NM_003979	GPRC5A	excluded
NM_004034	ANXA7	multimodal
NM_004048	B2M	included
NM_004074	COX8A	included
NM_004077	CS	multimodal
NM_004083	DDIT3	included
NM_004092	ECHS1	multimodal
NM_004095	EIF4EBP1	multimodal
NM_004125	DNAJC25-GNG10	multimodal
NM_004148	NINJ1	bimodal
NM_004161	RAB1A	excluded
NM_004223	UBE2L6	multimodal
NM_004231	ATP6V1F	included
NM_004252	SLC9A3R1	included
NM_004255	COX5A	excluded
NM_004261	SELENOF	multimodal
NM_004280	EEF1E1	excluded
NM_004295	TRAF4	excluded
NM_004322	BAD	multimodal
NM_004331	BNIP3L	excluded
NM_004335	BST2	middle
NM_004339	PTTG1IP	multimodal
NM_004343	CALR	multimodal
NM_004373	COX6A1	included
NM_004374	COX6C	excluded
NM_004393	DAG1	excluded
NM_004394	DAP	included
NM_004417	DUSP1	included
NM_004433	ELF3	excluded
NM_004450	ERH	multimodal
NM_004493	HSD17B10	multimodal
NM_004499	HNRNPAB	bimodal
NM_004501	HNRNPU	excluded
NM_004508	IDI1	excluded
NM_004528	MGST3	excluded
NM_004537	NAP1L1	excluded
NM_004542	NDUFA3	excluded
NM_004544	NDUFA10	excluded
NM_004547	NDUFB4	excluded
NM_004549	NDUFC2	excluded
NM_004551	NDUFS3	multimodal
NM_004593	TRA2B	excluded
NM_004607	TBCA	excluded
NM_004637	RAB7A	included
NM_004663	RAB11A	excluded
NM_004691	ATP6V0D1	multimodal
NM_004699	FAM50A	multimodal
NM_004708	PDCD5	excluded
NM_004710	SYNGR2	included
NM_004712	HGS	multimodal
NM_004713	NEMF	multimodal
NM_004718	COX7A2L	excluded
NM_004800	TM9SF2	excluded
NM_004862	LITAF	multimodal
NM_004888	ATP6V1G1	multimodal
NM_004905	PRDX6	multimodal
NM_004925	AQP3	multimodal
NM_004926	ZFP36L1	multimodal
NM_004960	FUS	included
NM_004965	HMGN1	included
NM_005001	NDUFA7	excluded
NM_005002	NDUFA9	excluded
NM_005008	SNU13	excluded
NM_005015	OXA1L	excluded
NM_005022	PFN1	included
NM_005034	POLR2K	multimodal
NM_005101	ISG15	multimodal
NM_005105	RBM8A	excluded
NM_005168	RND3	multimodal
NM_005216	DDOST	multimodal
NM_005252	FOS	multimodal
NM_005313	PDIA3	excluded
NM_005319	HIST1H1C	multimodal
NM_005324	H3F3B	excluded
NM_005327	HADH	multimodal
NM_005340	HINT1	excluded
NM_005347	HSPA5	excluded
NM_005381	NCL	excluded
NM_005439	MLF2	included
NM_005494	DNAJB6	included
NM_005506	SCARB2	excluded
NM_005507	CFL1	included
NM_005514	HLA-B	multimodal
NM_005516	HLA-E	multimodal
NM_005517	HMGN2	excluded
NM_005524	HES1	multimodal
NM_005556	KRT7	bimodal
NM_005567	LGALS3BP	multimodal
NM_005600	NIT1	multimodal
NM_005614	RHEB	excluded
NM_005620	S100A11	multimodal
NM_005669	REEP5	multimodal
NM_005698	SCAMP3	multimodal
NM_005720	ARPC1B	included
NM_005721	ACTR3	excluded
NM_005722	ACTR2	multimodal
NM_005724	TSPAN3	excluded
NM_005729	PPIF	multimodal
NM_005762	TRIM28	multimodal
NM_005765	ATP6AP2	multimodal
NM_005776	CNIH1	excluded
NM_005782	ALYREF	multimodal
NM_005787	ALG3	excluded
NM_005789	PSME3	multimodal
NM_005796	NUTF2	excluded
NM_005801	EIF1	excluded
NM_005803	FLOT1	multimodal
NM_005805	PSMD14	multimodal
NM_005809	PRDX2	included
NM_005817	PLIN3	multimodal
NM_005827	SLC35B1	excluded
NM_005837	POP7	multimodal
NM_005849	IGSF6	included
NM_005856	RAMP3	multimodal
NM_005870	SAP18	excluded
NM_005911	MAT2A	multimodal
NM_005953	MT2A	multimodal
NM_005971	FXYD3	excluded
NM_005980	S100P	multimodal
NM_005998	CCT3	multimodal
NM_006003	UQCRFS1	excluded
NM_006012	CLPP	excluded
NM_006013	RPL10	excluded
NM_006014	LAGE3	multimodal
NM_006022	TSC22D1	excluded
NM_006082	TUBA1B	included
NM_006088	TUBB4B	included
NM_006156	NEDD8	included
NM_006164	NFE2L2	multimodal
NM_006184	NUCB1	included
NM_006191	PA2G4	multimodal
NM_006192	PAX1	multimodal
NM_006223	PIN4	excluded
NM_006234	POLR2J	excluded
NM_006265	RAD21	multimodal
NM_006275	SRSF6	multimodal
NM_006304	SEM1	middle
NM_006327	TIMM23	multimodal
NM_006335	TIMM17A	multimodal
NM_006337	MCRS1	multimodal
NM_006339	HMG20B	included
NM_006349	ZNHIT1	multimodal
NM_006356	ATP5PD	included
NM_006368	CREB3	multimodal
NM_006396	ZNRD2	multimodal
NM_006401	ANP32B	included
NM_006407	ARL6IP5	multimodal
NM_006408	AGR2	excluded
NM_006412	AGPAT2	multimodal
NM_006423	RABAC1	included
NM_006428	MRPL28	multimodal
NM_006430	CCT4	excluded
NM_006431	CCT2	multimodal
NM_006432	NPC2	included
NM_006435	IFITM2	included
NM_006443	DNPH1	multimodal
NM_006471	MYL12A	included
NM_006476	ATP5MG	excluded
NM_006496	GNAI3	excluded
NM_006519	DYNLT1	multimodal
NM_006579	EBP	multimodal
NM_006597	HSPA8	included
NM_006600	NUDC	excluded
NM_006622	PLK2	multimodal
NM_006636	MTHFD2	excluded
NM_006645	STARD10	multimodal
NM_006694	JTB	excluded
NM_006708	GLO1	multimodal
NM_006713	SUB1	excluded
NM_006743	RBM3	multimodal
NM_006761	YWHAE	multimodal
NM_006793	PRDX3	multimodal
NM_006795	EHD1	multimodal
NM_006801	KDELR1	multimodal
NM_006808	SEC61B	multimodal
NM_006811	SERINC3	multimodal
NM_006815	TMED2	multimodal
NM_006816	LMAN2	multimodal
NM_006826	YWHAQ	included
NM_006827	TMED10	excluded
NM_006829	ADIRF	excluded
NM_006830	UQCR11	excluded
NM_006833	COPS6	excluded
NM_006854	KDELR2	multimodal
NM_006870	DSTN	excluded
NM_006886	ATP5F1E	excluded
NM_006899	IDH3B	multimodal
NM_006907	PYCR1	multimodal
NM_006908	RAC1	multimodal
NM_006923	SDF2	multimodal
NM_006924	SRSF1	excluded
NM_006925	SRSF5	multimodal
NM_006930	SKP1	excluded
NM_006937	SUMO2	excluded
NM_007006	NUDT21	multimodal
NM_007033	RER1	excluded
NM_007065	CDC37	multimodal
NM_007099	ACP1	multimodal
NM_007104	RPL10A	included
NM_007108	ELOB	excluded
NM_007178	STRAP	included
NM_007208	MRPL3	multimodal
NM_007236	CHP1	excluded
NM_007278	GABARAP	excluded
NM_007285	GABARAPL2	included
NM_007364	TMED3	included
NM_007367	RALY	excluded
NM_012203	GRHPR	multimodal
NM_012319	SLC39A6	multimodal
NM_012321	LSM4	excluded
NM_012322	LSM5	excluded
NM_012325	MAPRE1	multimodal
NM_012391	SPDEF	bimodal
NM_012394	PFDN2	included
NM_012412	H2AFV	excluded
NM_012433	SF3B1	excluded
NM_012456	TIMM10	multimodal
NM_012458	TIMM13	multimodal
NM_012459	TIMM8B	multimodal
NM_012473	TXN2	multimodal
NM_013238	DNAJC15	excluded
NM_013258	PYCARD	multimodal
NM_013336	SEC61A1	multimodal
NM_013349	NENF	excluded
NM_013379	DPP7	multimodal
NM_013387	UQCR10	excluded
NM_013442	STOML2	multimodal
NM_013995	LAMP2	multimodal
NM_014041	SPCS1	excluded
NM_014046	MRPS18B	multimodal
NM_014047	C19orf53	excluded
NM_014050	MRPL42	excluded
NM_014060	MCTS1	excluded
NM_014077	FAM32A	multimodal
NM_014078	MRPL13	excluded
NM_014106	ZNF770	multimodal
NM_014172	PHPT1	included
NM_014175	MRPL15	excluded
NM_014182	ORMDL2	multimodal
NM_014187	TMEM208	included
NM_014188	SSU72	multimodal
NM_014206	TMEM258	excluded
NM_014220	TM4SF1	multimodal
NM_014222	NDUFA8	multimodal
NM_014225	PPP2R1A	excluded
NM_014248	RBX1	excluded
NM_014255	CNPY2	excluded
NM_014267	C11orf58	excluded
NM_014313	TMEM50A	excluded
NM_014330	PPP1R15A	included
NM_014335	EID1	multimodal
NM_014341	MTCH1	included
NM_014367	FAM162A	excluded
NM_014380	BEX3	included
NM_014394	GHITM	multimodal
NM_014399	TSPAN13	included
NM_014402	UQCRQ	excluded
NM_014445	SERP1	excluded
NM_014455	RNF115	excluded
NM_014463	LSM3	excluded
NM_014501	UBE2S	excluded
NM_014604	TAX1BP3	included
NM_014623	MEA1	included
NM_014624	S100A6	multimodal
NM_014713	LAPTM4A	included
NM_014736	PCLAF	excluded
NM_014740	EIF4A3	excluded
NM_014752	SPCS2	excluded
NM_014765	TOMM20	multimodal
NM_015051	ERP44	excluded
NM_015161	ARL6IP1	multimodal
NM_015388	YIPF3	included
NM_015391	ANAPC13	multimodal
NM_015392	NPDC1	bimodal
NM_015415	MPC2	excluded
NM_015497	TMEM87A	multimodal
NM_015564	LRRTM2	multimodal
NM_015584	POLDIP2	multimodal
NM_015702	MMADHC	multimodal
NM_015853	UBXN1	included
NM_015871	ZNF593	multimodal
NM_015920	RPS27L	excluded
NM_015921	CUTA	middle
NM_015932	POMP	excluded
NM_015933	TMA7	excluded
NM_015949	GET4	multimodal
NM_015966	ERGIC3	multimodal
NM_015971	MRPS7	multimodal
NM_016002	SCCPDH	excluded
NM_016022	APH1A	multimodal
NM_016038	SBDS	multimodal
NM_016039	RTRAF	excluded
NM_016047	SF3B6	included
NM_016061	YPEL5	multimodal
NM_016062	CIAO2B	multimodal
NM_016065	MRPS16	excluded
NM_016068	FIS1	excluded
NM_016070	MRPS23	excluded
NM_016079	CHMP3	multimodal
NM_016085	ATRAID	multimodal
NM_016100	NAA20	multimodal
NM_016127	SARAF	multimodal
NM_016131	RAB10	multimodal
NM_016145	WDR83OS	included
NM_016199	LSM7	multimodal
NM_016200	LSM8	excluded
NM_016208	VPS28	included
NM_016219	MAN1B1	multimodal
NM_016237	ANAPC5	multimodal
NM_016275	SELENOT	excluded
NM_016283	AK6	excluded
NM_016286	DCXR	multimodal
NM_016311	ATP5IF1	included
NM_016400	HYPK	excluded
NM_016404	TRMT112	included
NM_016406	UFC1	included
NM_016462	TMEM14C	included
NM_016470	OSER1	excluded
NM_016480	PAIP2	multimodal
NM_016491	MRPL37	multimodal
NM_016494	RNF181	excluded
NM_016497	MRPL51	excluded
NM_016504	MRPL27	multimodal
NM_016520	C9orf78	multimodal
NM_016565	COA4	multimodal
NM_016592	GNAS	included
NM_016639	TNFRSF12A	multimodal
NM_016641	GDE1	multimodal
NM_016816	OAS1	excluded
NM_017491	WDR1	included
NM_017510	TMED9	excluded
NM_017528	BUD23	multimodal
NM_017670	OTUB1	multimodal
NM_017819	TRMT10C	excluded
NM_017823	DUSP23	multimodal
NM_017841	SDHAF2	multimodal
NM_017861	PIGX	excluded
NM_017866	TMEM70	excluded
NM_017896	GID8	multimodal
NM_017907	LAMTOR1	included
NM_017914	C19orf24	multimodal
NM_017924	C14orf119	excluded
NM_017971	MRPL20	multimodal
NM_018049	PLEKHJ1	included
NM_018407	LAPTM4B	multimodal
NM_018445	SELENOS	multimodal
NM_018453	EAPP	multimodal
NM_018462	BRK1	multimodal
NM_018491	CBWD1	excluded
NM_018648	NOP10	included
NM_018670	MESP1	multimodal
NM_018683	RNF114	multimodal
NM_018838	NDUFA12	included
NM_018946	NANS	multimodal
NM_018947	CYCS	excluded
NM_018997	MRPS21	excluded
NM_019026	TMCO1	excluded
NM_019037	EXOSC4	included
NM_019059	TOMM7	included
NM_019107	MYDGF	multimodal
NM_019613	WDR45B	multimodal
NM_020154	EMC7	bimodal
NM_020202	NIT2	excluded
NM_020307	CCNL1	multimodal
NM_020387	RAB25	multimodal
NM_020529	NFKBIA	bimodal
NM_020531	APMAP	multimodal
NM_020532	RTN4	multimodal
NM_020672	S100A14	multimodal
NM_020791	TAOK1	excluded
NM_020992	PDLIM1	included
NM_021009	UBC	included
NM_021029	RPL36A	excluded
NM_021034	IFITM3	included
NM_021095	SLC5A6	multimodal
NM_021103	TMSB10	included
NM_021104	RPL41	multimodal
NM_021109	TMSB4X	included
NM_021128	POLR2L	excluded
NM_021129	PPA1	bimodal
NM_021130	PPIA	excluded
NM_021173	POLD4	excluded
NM_021177	LSM2	multimodal
NM_021203	SRPRB	excluded
NM_021237	SELENOK	excluded
NM_021243	ABRACL	multimodal
NM_021709	SIVA1	included
NM_021960	MCL1	bimodal
NM_021999	ITM2B	excluded
NM_022044	SDF2L1	multimodal
NM_022100	MRPS14	excluded
NM_022121	PERP	excluded
NM_022130	GOLPH3	multimodal
NM_022488	ATG3	multimodal
NM_022818	MAP1LC3B	multimodal
NM_022873	IFI6	multimodal
NM_022877	SMN2	multimodal
NM_023080	C8orf33	multimodal
NM_023934	FUNDC2	excluded
NM_023935	DDRGK1	excluded
NM_023936	MRPS34	multimodal
NM_024026	MRPL57	excluded
NM_024038	TRIR	included
NM_024051	GGCT	multimodal
NM_024071	ZFYVE21	included
NM_024092	TMEM109	multimodal
NM_024112	C9orf16	included
NM_024348	DCTN3	multimodal
NM_024592	SRD5A3	excluded
NM_024613	PLEKHF2	multimodal
NM_025124	TMEM134	excluded
NM_025146	NAA50	multimodal
NM_030789	HM13	multimodal
NM_030811	MRPS26	multimodal
NM_030916	NECTIN4	multimodal
NM_030939	C6orf62	included
NM_030978	ARPC5L	excluded
NM_030981	RAB1B	multimodal
NM_031243	HNRNPA2B1	multimodal
NM_031263	HNRNPK	multimodal
NM_031286	SH3BGRL3	included
NM_031287	SF3B5	multimodal
NM_031298	EMC6	multimodal
NM_031308	EPPK1	excluded
NM_031314	HNRNPC	excluded
NM_031370	HNRNPD	multimodal
NM_031372	HNRNPDL	excluded
NM_031420	MRPL9	multimodal
NM_031452	RAMAC	multimodal
NM_031844	HNRNPU	excluded
NM_031903	MRPL32	multimodal
NM_031991	PTBP1	multimodal
NM_032014	MRPS24	included
NM_032112	MRPL43	multimodal
NM_032193	RNASEH2C	excluded
NM_032231	CIAO2A	multimodal
NM_032272	MAF1	multimodal
NM_032286	MED10	multimodal
NM_032302	PSMG3	multimodal
NM_032306	ALKBH7	excluded
NM_032338	LLPH	multimodal
NM_032339	MIEN1	excluded
NM_032350	C7orf50	included
NM_032353	VPS25	multimodal
NM_032360	ACBD6	multimodal
NM_032361	THOC3	excluded
NM_032366	METTL26	multimodal
NM_032412	CYSTM1	multimodal
NM_032476	MRPS6	multimodal
NM_032477	MRPL41	multimodal
NM_032479	MRPL36	multimodal
NM_032574	DPY30	multimodal
NM_032656	DHX37	multimodal
NM_032667	BSCL2	multimodal
NM_032731	TXNDC17	excluded
NM_032773	LRCH3	included
NM_032901	COX14	included
NM_032906	PYURF	multimodal
NM_032989	BAD	multimodal
NM_033318	SMDT1	excluded
NM_033362	MRPS12	multimodal
NM_033363	MRPS12	multimodal
NM_033504	TMEM54	multimodal
NM_033546	MYL12B	excluded
NM_033630	SCAND1	multimodal
NM_033643	RPL36	excluded
NM_033668	ITGB1	included
NM_044472	CDC42	included
NM_052844	WDR34	multimodal
NM_052850	GADD45GIP1	excluded
NM_052886	MAL2	multimodal
NM_052951	DNTTIP1	multimodal
NM_053050	MRPL53	multimodal
NM_053056	CCND1	multimodal
NM_053275	RPLP0	included
NM_054014	FKBP1A	included
NM_054016	SRSF10	multimodal
NM_080593	HIST1H2BK	included
NM_080626	BRI3BP	multimodal
NM_080648	APEX1	included
NM_080652	TMEM41A	excluded
NM_080821	FAM210B	multimodal
NM_130786	A1BG	excluded
NM_133639	RHOV	multimodal
NM_134265	WSB1	excluded
NM_138288	SPTSSA	excluded
NM_138446	MALSU1	excluded
NM_138610	H2AFY	bimodal
NM_138689	PPP1R14B	multimodal
NM_138764	BAX	included
NM_138820	HIGD2A	included
NM_138924	GAMT	multimodal
NM_139062	CSNK1D	excluded
NM_139323	YWHAB	multimodal
NM_144578	MAPK1IP1L	multimodal
NM_144772	NAXE	excluded
NM_145169	SFT2D1	multimodal
NM_145252	ZG16B	multimodal
NM_145330	MRPL33	multimodal
NM_145729	MRPL24	multimodal
NM_145792	MGST1	multimodal
NM_148912	ABHD11	multimodal
NM_148919	PSMB8	included
NM_148976	PSMA1	included
NM_152285	ARRDC1	multimodal
NM_152685	SLC23A1	included
NM_152766	TMEM256	multimodal
NM_152862	ARPC2	multimodal
NM_153001	PSMC4	excluded
NM_153200	EDF1	included
NM_153201	HSPA8	included
NM_153280	UBA1	multimodal
NM_153373	PHYKPL	bimodal
NM_153824	PYCR1	multimodal
NM_170679	SKP1	excluded
NM_170708	LMNA	excluded
NM_170739	MRPL11	excluded
NM_172251	MRPL54	multimodal
NM_173614	NOMO2	multimodal
NM_174886	TGIF1	excluded
NM_174909	TMEM167A	excluded
NM_175732	PTPMT1	excluded
NM_175932	PSMD13	included
NM_176783	PSME1	included
NM_177534	SULT1A1	excluded
NM_177542	SNRPD2	included
NM_177543	PLPP2	multimodal
NM_177552	SULT1A3	multimodal
NM_177925	H2AFJ	included
NM_177983	PPM1G	multimodal
NM_178190	ATP5IF1	included
NM_178191	ATP5IF1	included
NM_178578	PSMF1	excluded
NM_178582	HM13	included
NM_180982	MRPL52	excluded
NM_181462	MRPL55	multimodal
NM_181466	EIF6	included
NM_181468	EIF6	included
NM_181528	NAA20	multimodal
NM_181652	PRDX5	multimodal
NM_181800	UBE2C	multimodal
NM_181836	TMED7	multimodal
NM_181843	NUDT8	multimodal
NM_182649	PCNA	multimodal
NM_182685	EFNA1	multimodal
NM_182776	MCM7	multimodal
NM_182810	ATF4	included
NM_182917	EIF4G1	multimodal
NM_183057	VPS28	included
NM_183237	RNF7	excluded
NM_183241	PAXX	multimodal
NM_183425	RBM38	multimodal
NM_184043	ALDOA	included
NM_194261	UBE2I	excluded
NM_194326	RPS19BP1	included
NM_194434	VAPA	excluded
NM_197955	C15orf48	excluded
NM_197966	BID	excluded
NM_198057	TSC22D3	included
NM_198175	NME1	multimodal
NM_198242	EIF4G1	multimodal
NM_198426	CHMP2A	included
NM_198536	TMEM205	multimodal
NM_198590	BSG	included
NM_198591	BSG	included
NM_198883	MTX1	multimodal
NM_198976	NELFCD	included
NM_199074	NDUFAF3	multimodal
NM_199184	DNPH1	multimodal
NM_201384	PLEC	excluded
NM_201397	GPX1	included
NM_201429	RTN3	multimodal
NM_203298	CHCHD1	excluded
NM_203401	STMN1	excluded
NM_203458	NOTCH2NLA	excluded
NM_203464	AK4	multimodal
NM_206917	BEX3	middle
NM_206918	DEGS2	excluded
NM_207047	ENSA	multimodal
NM_207168	ENSA	multimodal
NM_212460	ARL4A	multimodal
NM_212552	BOLA3	multimodal
NM_213725	RPLP1	excluded
NR_001317	HCG4B	multimodal
NR_001434	HLA-H	multimodal
NR_001445	RN7SK	multimodal
NR_002201	FTH1P3	multimodal
NR_002308	UQCRBP1	multimodal
NR_002315	H3F3AP4	included
NR_002453	SMG1P5	included
NR_002454	LOC606724	included
NR_002556	LOC388242	multimodal
NR_002594	SLC7A5P2	multimodal
NR_002715	RN7SL1	multimodal
NR_002985	SNORA58	bimodal
NR_002988	SNORA74B	included
NR_003010	SCARNA12	included
NR_003015	SNORA53	included
NR_003189	SYS1-DBNDD2	multimodal
NR_003225	LGALS3	multimodal
NR_003573	ANXA2P2	multimodal
NR_003605	ZFAS1	multimodal
NR_023358	SCARNA9L	bimodal
NR_024206	CYTOR	multimodal
NR_024373	MIR4435-2HG	multimodal
NR_024454	NDUFB2-AS1	excluded
NR_024456	LOC100190986	included
NR_024629	IDI2-AS1	multimodal
NR_026712	RPL13AP5	included
NR_027155	SMG1P3	included
NR_027168	SNHG29	multimodal
NR_027260	RN7SL2	multimodal
NR_027406	LOC100129034	multimodal
NR_027418	LINC00674	excluded
NR_027645	ATP1A1-AS1	bimodal
NR_028052	NGRN	bimodal
NR_028323	SLC5A6	multimodal
NR_028370	PCNA-AS1	multimodal
NR_028443	SLC25A5-AS1	excluded
NR_028510	TYRO3P	included
NR_029378	LOC100289511	excluded
NR_029426	SMA4	multimodal
NR_029434	PSMA3-AS1	included
NR_031762	HCP5B	multimodal
NR_033343	PSCA	multimodal
NR_034041	SRSF1	excluded
NR_034106	CRNDE	multimodal
NR_037600	LINC01578	excluded
NR_037608	SLX1A-SULT1A3	multimodal
NR_037609	SLX1B-SULT1A4	included
NR_037673	SERF2-C15ORF63	excluded
NR_037688	ACTG1	included
NR_037717	RNASEK-C17orf49	multimodal
NR_037926	SENP3-EIF4A1	multimodal
NR_037928	P2RX5-TAX1BP3	included
NR_037969	SRD5A3-AS1	multimodal
NR_038111	SNHG16	multimodal
NR_038193	METTL23	multimodal
NR_038286	PSMD6-AS2	included
NR_038322	MAP3K13	excluded
NR_038410	TSPOAP1-AS1	excluded
NR_038894	CBR3-AS1	multimodal
NR_040049	SDCBP2-AS1	included
NR_045586	SRA1	excluded
NR_046413	POLD4	excluded
NR_046633	NUCB1-AS1	included
NR_046853	HM13-AS1	included
NR_049759	IFITM3	included
NR_051984	PRC1-AS1	multimodal
NR_073084	CRIP2	included
NR_073412	TMEM134	multimodal
NR_073609	PDCD6	included
NR_077246	RPS14P3	multimodal
NR_102318	ACTR3	excluded
NR_102400	PYCARD-AS1	excluded
NR_102427	CIB1	included
NR_103560	GSN-AS1	multimodal
NR_103819	SNRPD3	excluded
NR_104029	DGUOK-AS1	included
NR_104165	MDH2	included
NR_104454	TMEM14B	multimodal
NR_109828	PCBP2-OT1	included
NR_109875	LOC101927100	multimodal
NR_109878	LINC01726	multimodal
NR_110009	ADNP-AS1	included
NR_110044	LOC101926943	multimodal
NR_110578	CSNK1D	excluded
NR_110730	PTOV1-AS2	multimodal
NR_120608	TUBB	multimodal
NR_130143	LOC104968399	included
NR_132776	SNORA94	bimodal
NR_133645	S100A16	included
NR_134538	C7orf50	included
NR_134671	TRAPPC2L	excluded
NR_134848	GAA	excluded
NR_134869	HEXA	multimodal
NR_135305	SMG1P2	multimodal
NR_135587	DPY30	multimodal
NR_136278	LOC105375713	included
NR_136587	RBM39	included
NR_138060	ARL16	multimodal
NR_144447	ZNF8-ERVK3-1	included
NR_144567	MALAT1	included
NR_145425	RUSC1-AS1	included
NR_145721	SNORA74C-1	included
NR_145819	RNA45SN1	excluded
NR_145820	RNA18SN1	excluded
NR_145822	RNA28SN1	excluded
NR_146063	SMIM27	included
NR_146144	RNA45SN2	excluded
NR_146146	RNA18SN2	excluded
NR_146148	RNA28SN2	multimodal
NR_146151	RNA45SN3	excluded
NR_146152	RNA18SN3	excluded
NR_146154	RNA28SN3	multimodal
NR_146274	KRT7-AS	included
NR_146472	ELF3-AS1	multimodal
NR_146967	C7orf50	included
NR_147233	TPM1-AS	multimodal
NR_148712	ENOSF1	multimodal
NR_155756	TBCB	multimodal
NR_157088	CLTB	multimodal
NR_157580	LOC440292	excluded
NR_158216	LOC105370687	excluded
NR_160308	GCNT7	included
NR_160400	TIMM8B	multimodal
NR_160950	SNHG32	multimodal
NR_163478	NA	excluded
NR_163943	NA	excluded
NR_171558	NA	multimodal
NR_171559	NA	multimodal
NR_171562	NA	multimodal

## Sheet: SRP186111_CTCclusters
APA_ID	Gene_Symbol	Modality
NM_000050	ASS1	excluded
NM_000099	CST3	middle
NM_000100	CSTB	included
NM_000101	CYBA	multimodal
NM_000146	FTL	included
NM_000269	NME1	excluded
NM_000270	PNP	multimodal
NM_000291	PGK1	excluded
NM_000294	PHKG2	multimodal
NM_000310	PPT1	multimodal
NM_000365	TPI1	multimodal
NM_000454	SOD1	excluded
NM_000485	APRT	excluded
NM_000507	FBP1	multimodal
NM_000574	CD55	multimodal
NM_000581	GPX1	bimodal
NM_000700	ANXA1	multimodal
NM_000701	ATP1A1	multimodal
NM_000712	BLVRA	multimodal
NM_000713	BLVRB	multimodal
NM_000714	TSPO	included
NM_000754	COMT	excluded
NM_000801	FKBP1A	middle
NM_000852	GSTP1	multimodal
NM_000903	NQO1	excluded
NM_000918	P4HB	included
NM_000943	PPIC	multimodal
NM_000968	RPL4	excluded
NM_000971	RPL7	excluded
NM_000975	RPL11	excluded
NM_000977	RPL13	excluded
NM_000978	RPL23	excluded
NM_000981	RPL19	middle
NM_000983	RPL22	multimodal
NM_000984	RPL23A	excluded
NM_000990	RPL27A	excluded
NM_000991	RPL28	excluded
NM_000992	RPL29	middle
NM_000993	RPL31	excluded
NM_000994	RPL32	excluded
NM_000996	RPL35A	excluded
NM_000997	RPL37	excluded
NM_000998	RPL37A	excluded
NM_001000	RPL39	included
NM_001001	RPL36AL	excluded
NM_001001392	CD44	excluded
NM_001001503	NDUFV3	excluded
NM_001001701	C4orf3	excluded
NM_001002027	ATP5MC1	included
NM_001002033	JPT1	multimodal
NM_001002248	ANAPC11	included
NM_001002258	ATP5MC3	excluded
NM_001002858	ANXA2	excluded
NM_001004333	RNASEK	multimodal
NM_001005354	PRR13	included
NM_001005474	NFKBIZ	multimodal
NM_001005781	SUMO1	excluded
NM_001006941	ALG3	multimodal
NM_001007	RPS4X	excluded
NM_001007070	SDCBP	bimodal
NM_001007074	RPL32	excluded
NM_001007214	CACYBP	excluded
NM_001007565	TFG	multimodal
NM_001008709	PPP1CA	included
NM_001009184	GRINA	multimodal
NM_001009186	CCT6A	multimodal
NM_001009570	CCT7	included
NM_001010	RPS6	excluded
NM_001010858	RNF187	excluded
NM_001010974	BCAS4	multimodal
NM_001010989	HERPUD1	excluded
NM_001011537	FYTTD1	multimodal
NM_001012	RPS8	excluded
NM_001012270	BIRC5	excluded
NM_001012300	MCRS1	multimodal
NM_001012664	SLC3A2	multimodal
NM_001013653	LRRC26	multimodal
NM_001014763	ETFB	multimodal
NM_001014990	MRPL22	excluded
NM_001017390	SULT1A4	multimodal
NM_001017963	HSP90AA1	excluded
NM_001017998	GNG10	middle
NM_001018004	TPM1	included
NM_001018067	SERBP1	excluded
NM_001018136	NME1-NME2	included
NM_001018837	HAX1	included
NM_001019	RPS15A	excluded
NM_001022	RPS19	excluded
NM_001023	RPS20	middle
NM_001024212	S100A13	middle
NM_001024844	CD82	excluded
NM_001024957	BRMS1	multimodal
NM_001024960	ARPC4	included
NM_001025	RPS23	excluded
NM_001025071	RPS14	excluded
NM_001025205	AP2M1	included
NM_001029	RPS26	excluded
NM_001030018	APRT	included
NM_001030287	ATF3	multimodal
NM_001031	RPS28	excluded
NM_001031677	RAB24	excluded
NM_001031684	SRSF7	excluded
NM_001031711	ERGIC1	bimodal
NM_001032409	OAS1	multimodal
NM_001033056	GLUL	excluded
NM_001033503	SAR1B	excluded
NM_001034	RRM2	multimodal
NM_001034025	ERP29	excluded
NM_001035005	C18orf32	excluded
NM_001035513	SDHC	multimodal
NM_001037164	ARL4A	excluded
NM_001037494	DYNLL1	multimodal
NM_001037811	HSD17B10	multimodal
NM_001039457	ATP6V0B	included
NM_001039490	CD151	middle
NM_001039577	CCNL2	bimodal
NM_001039712	DEDD	multimodal
NM_001040431	COA3	included
NM_001040619	ATF3	multimodal
NM_001040649	ACP1	included
NM_001040874	HIST2H2AA4	included
NM_001042432	CLN3	multimodal
NM_001042462	TRAPPC5	excluded
NM_001042465	PSAP	included
NM_001042472	ABHD12	multimodal
NM_001042483	NUPR1	excluded
NM_001042679	RHOC	included
NM_001043352	TPM3	excluded
NM_001048249	SMIM15	excluded
NM_001069	TUBB2A	multimodal
NM_001070	TUBG1	included
NM_001077399	PNKD	included
NM_001077628	APH1A	multimodal
NM_001078166	SRSF1	multimodal
NM_001079862	DBI	included
NM_001085365	MZT2A	multimodal
NM_001085372	UQCC3	excluded
NM_001086521	NDUFAF8	included
NM_001089591	UQCRHL	excluded
NM_001098208	HNRNPF	middle
NM_001098398	COPA	excluded
NM_001098616	C1orf43	included
NM_001098673	ATG101	multimodal
NM_001098786	HILPDA	multimodal
NM_001099406	SLC39A6	multimodal
NM_001099639	ZNF146	multimodal
NM_001099645	RPL22L1	excluded
NM_001099668	HIGD1A	excluded
NM_001099693	RPL31	multimodal
NM_001101	ACTB	multimodal
NM_001102667	PSMA4	multimodal
NM_001102668	PSMA4	excluded
NM_001105204	RUSC1	multimodal
NM_001105205	RUSC1	multimodal
NM_001110503	TMEM87A	bimodal
NM_001113205	TSTD1	included
NM_001122955	BSCL2	multimodal
NM_001123355	PPP6C	excluded
NM_001123377	PARK7	excluded
NM_001126051	HDGF	multimodal
NM_001127192	CNBP	excluded
NM_001127198	TMC6	excluded
NM_001127213	LY6E	multimodal
NM_001127223	CD59	excluded
NM_001127393	ATP5MPL	excluded
NM_001127394	TSEN15	multimodal
NM_001127889	SPG21	multimodal
NM_001128203	PLAAT3	excluded
NM_001128914	PCBP2	multimodal
NM_001130004	ACTN1	multimodal
NM_001130674	CALU	multimodal
NM_001130678	EIF4E	excluded
NM_001130689	HMGB2	excluded
NM_001130725	PSMB5	included
NM_001130929	STMP1	excluded
NM_001134321	RTL8A	included
NM_001134484	TOMM5	multimodal
NM_001134493	TOMM6	multimodal
NM_001135239	LDHA	excluded
NM_001135255	RBBP4	multimodal
NM_001135592	RPS27A	excluded
NM_001135694	VDAC3	included
NM_001135702	YWHAZ	excluded
NM_001135998	NDUFB11	included
NM_001136008	FXYD3	multimodal
NM_001136010	FXYD3	multimodal
NM_001136016	APP	multimodal
NM_001136017	CCND3	multimodal
NM_001136134	RPL28	excluded
NM_001136136	RPL28	included
NM_001136137	RPL28	included
NM_001136232	SEC13	included
NM_001136268	DAZAP2	multimodal
NM_001136275	AKIRIN1	multimodal
NM_001136497	BTF3L4	excluded
NM_001136498	CISD3	multimodal
NM_001137553	LRRFIP1	multimodal
NM_001139457	BCAP31	multimodal
NM_001142298	SQSTM1	included
NM_001142418	MORF4L2	included
NM_001142625	RAB34	multimodal
NM_001142627	SEC61A2	included
NM_001142648	SAR1A	excluded
NM_001142798	C17orf49	multimodal
NM_001142799	C17orf49	multimodal
NM_001143681	GSTK1	multimodal
NM_001143760	EIF5A	middle
NM_001143780	SLC25A39	multimodal
NM_001143841	TMEM106C	multimodal
NM_001143937	PSMA1	included
NM_001143985	BANF1	middle
NM_001144831	PHB2	included
NM_001144932	PSMB5	included
NM_001144943	RAB34	included
NM_001144944	MYL12B	multimodal
NM_001145145	SLC1A5	multimodal
NM_001145155	NR2F2	excluded
NM_001145156	NR2F2	excluded
NM_001145160	TPM4	included
NM_001145355	CBWD1	excluded
NM_001145410	NONO	multimodal
NM_001145412	NFE2L2	multimodal
NM_001145713	SAE1	excluded
NM_001145940	PAFAH1B3	included
NM_001146068	CAPN2	included
NM_001146178	IP6K2	multimodal
NM_001146191	MPZL1	excluded
NM_001146333	SUMF2	multimodal
NM_001151	SLC25A4	excluded
NM_001152	SLC25A5	middle
NM_001154	ANXA5	excluded
NM_001159287	TPI1	multimodal
NM_001162407	CLK1	excluded
NM_001163424	COPS9	included
NM_001164189	PLIN3	multimodal
NM_001165415	LDHA	excluded
NM_001165931	RRM2	multimodal
NM_001166103	SPINT2	middle
NM_001166237	GSDMD	multimodal
NM_001168331	NDUFB4	included
NM_001170406	CDK1	included
NM_001170634	FUS	excluded
NM_001170795	ATRAID	included
NM_001171508	MCFD2	excluded
NM_001171511	MCFD2	excluded
NM_001172415	BAG1	excluded
NM_001172695	TSFM	excluded
NM_001172705	EIF4G2	included
NM_001173128	YTHDF2	multimodal
NM_001177	ARL1	excluded
NM_001177643	DAG1	excluded
NM_001178087	SERF1B	multimodal
NM_001183	ATP6AP1	included
NM_001184722	GPI	multimodal
NM_001184730	PIGT	included
NM_001184740	CTTN	included
NM_001184761	CLTA	included
NM_001184823	VDAC2	excluded
NM_001184891	FLAD1	multimodal
NM_001184979	NDUFS5	included
NM_001185	AZGP1	excluded
NM_001185012	NDUFA2	multimodal
NM_001185077	ARHGDIA	multimodal
NM_001185092	NIT1	multimodal
NM_001190329	ATP5MC3	excluded
NM_001190452	MTRNR2L1	excluded
NM_001190470	MTRNR2L2	excluded
NM_001190472	MTRNR2L3	included
NM_001190702	MTRNR2L8	excluded
NM_001190706	MTRNR2L9	excluded
NM_001190864	MRPS35	multimodal
NM_001190991	CNPY2	included
NM_001190996	ARPC1A	included
NM_001191003	GSTO1	middle
NM_001193557	ENY2	excluded
NM_001193572	CSRP1	included
NM_001193655	CYBC1	multimodal
NM_001195056	DDIT3	included
NM_001195427	SRSF2	included
NM_001195478	TFG	multimodal
NM_001195536	CHMP5	excluded
NM_001197139	DBNDD2	included
NM_001198569	ATP6V0C	excluded
NM_001198719	RBBP7	excluded
NM_001198846	RBM14-RBM4	included
NM_001198868	CAPN1	multimodal
NM_001199038	SERINC2	excluded
NM_001199142	EIF3C	excluded
NM_001199355	RPL17-C18orf32	excluded
NM_001199535	TGIF2-RAB5IF	multimodal
NM_001199780	PSMB2	excluded
NM_001199786	FKBP1A	middle
NM_001199851	DAP3	excluded
NM_001199876	SERF2	excluded
NM_001199877	SERF2	excluded
NM_001199954	ACTG1	included
NM_001199957	NDUFB5	excluded
NM_001199975	UQCRB	excluded
NM_001201483	ENO1	included
NM_001202547	SYNJ2BP-COX16	excluded
NM_001204054	NDUFC2	excluded
NM_001204064	CHURC1	excluded
NM_001204082	MICOS10	excluded
NM_001204193	SRP19	excluded
NM_001204196	SRP19	excluded
NM_001204199	SRP19	included
NM_001204861	ELOC	excluded
NM_001206486	ATF3	multimodal
NM_001206799	PKM	included
NM_001206836	RAB11A	excluded
NM_001207000	HNRNPDL	excluded
NM_001212	C1QBP	included
NM_001220777	CDKN1A	multimodal
NM_001236	CBR3	multimodal
NM_001242375	ANAPC13	multimodal
NM_001242598	TMEM147	included
NM_001242831	ELOVL5	multimodal
NM_001242839	GUK1	included
NM_001242840	GUK1	included
NM_001242854	ARFIP2	multimodal
NM_001242891	CSDE1	multimodal
NM_001242918	ZFAND6	bimodal
NM_001243131	RPL13	excluded
NM_001243252	EFHD1	multimodal
NM_001243646	CD2BP2	excluded
NM_001243719	RAB6A	multimodal
NM_001243799	TSC22D1	excluded
NM_001243885	TOB1	multimodal
NM_001243892	TPD52L2	multimodal
NM_001244572	BID	excluded
NM_001244644	CHMP2B	excluded
NM_001244701	ZFP36L1	multimodal
NM_001244812	FOXP1	multimodal
NM_001251918	RAP1B	excluded
NM_001252053	PCMT1	multimodal
NM_001252273	DIPK1A	included
NM_001253379	RPL15	excluded
NM_001253764	SRA1	excluded
NM_001253790	SMIM22	excluded
NM_001253816	SLC52A2	multimodal
NM_001254738	RND3	multimodal
NM_001256165	TMCO1	excluded
NM_001256281	RAB34	included
NM_001256302	ETF1	multimodal
NM_001256355	UBE2L3	excluded
NM_001256399	ELOVL1	middle
NM_001256534	SLC25A1	multimodal
NM_001256580	RPL10	excluded
NM_001256721	CCT4	excluded
NM_001256829	TMEM265	excluded
NM_001256879	POLD2	multimodal
NM_001256891	SRI	included
NM_001257096	PAX1	included
NM_001257335	ATP5F1A	excluded
NM_001257401	CD63	excluded
NM_001258028	TKT	excluded
NM_001258289	SELENBP1	multimodal
NM_001258320	TP53I11	multimodal
NM_001258384	IDH3B	included
NM_001258423	SMS	multimodal
NM_001260506	RPS3	excluded
NM_001260507	RPS3	excluded
NM_001261400	PSMD9	excluded
NM_001261401	TSN	multimodal
NM_001261466	ADAM15	included
NM_001265591	RTN3	multimodal
NM_001265603	MORF4L1	excluded
NM_001267061	SNX17	multimodal
NM_001267558	PDCD6	multimodal
NM_001267699	RPS3A	included
NM_001267700	PHB2	included
NM_001267708	ZNF706	excluded
NM_001267809	ILF2	multimodal
NM_001267817	OSTC	multimodal
NM_001270399	TUBA1A	multimodal
NM_001270439	ARPC5	excluded
NM_001270447	ACADVL	included
NM_001270481	PSMB6	included
NM_001270482	PSMD11	excluded
NM_001270491	RPL13A	multimodal
NM_001270550	MDK	middle
NM_001270552	MDK	middle
NM_001270837	CRIP2	included
NM_001270896	TRAPPC3	multimodal
NM_001270987	LTBR	multimodal
NM_001271213	SQOR	multimodal
NM_001271641	MTCH1	included
NM_001271734	COPZ1	multimodal
NM_001271742	CSNK1A1	excluded
NM_001271849	CDK2AP2	multimodal
NM_001271878	KHDRBS1	multimodal
NM_001271918	SEC11A	multimodal
NM_001271957	SLC39A1	included
NM_001271970	HSP90AB1	included
NM_001271998	RAB4A	excluded
NM_001272007	ISCA2	excluded
NM_001272038	RAB13	multimodal
NM_001272053	MRFAP1	included
NM_001272083	SHISA5	included
NM_001277199	CNIH4	excluded
NM_001277224	TAGLN2	included
NM_001277764	CIB1	excluded
NM_001278191	TPM3	excluded
NM_001278197	CDK5RAP3	included
NM_001278243	ZFAND5	excluded
NM_001278244	ZFAND5	excluded
NM_001278263	CARHSP1	excluded
NM_001278265	CARHSP1	excluded
NM_001278346	PHYKPL	bimodal
NM_001278379	ARL6IP4	multimodal
NM_001278555	UBE2E3	multimodal
NM_001278556	ARPC3	middle
NM_001278645	NDUFB9	multimodal
NM_001278656	SNRPD3	excluded
NM_001278700	POLR2H	included
NM_001278712	ATG3	included
NM_001278946	SEC13	included
NM_001279360	LYPLA1	excluded
NM_001280	CIRBP	included
NM_001280557	SLC39A4	included
NM_001280789	SURF4	included
NM_001280790	SURF4	included
NM_001281297	EDF1	included
NM_001281427	DCTN3	multimodal
NM_001281434	ZNHIT3	included
NM_001281437	ADRM1	included
NM_001281447	GTF2IRD2	multimodal
NM_001281474	MLPH	excluded
NM_001281496	PHB	multimodal
NM_001281497	PHB	multimodal
NM_001281512	HADHB	multimodal
NM_001281529	PSME1	included
NM_001281532	PSENEN	excluded
NM_001281716	UBB	multimodal
NM_001281719	UBB	multimodal
NM_001282150	VPS29	excluded
NM_001282161	UBE2A	multimodal
NM_001282162	CAPZB	excluded
NM_001282205	SIGMAR1	multimodal
NM_001282234	PSMA6	included
NM_001282385	CSNK2B	multimodal
NM_001282404	MDH2	excluded
NM_001282576	UBE2V1	multimodal
NM_001282580	UBE2V1	bimodal
NM_001282604	PTGES3	multimodal
NM_001282606	TMBIM4	excluded
NM_001282621	PGRMC1	multimodal
NM_001282625	LMNA	multimodal
NM_001282652	STIP1	middle
NM_001282674	BEX3	middle
NM_001283037	RTF2	excluded
NM_001284239	SARAF	multimodal
NM_001284367	NDUFB8	included
NM_001284368	NDUFB8	multimodal
NM_001284502	NUBP2	multimodal
NM_001285450	PDXDC1	multimodal
NM_001286056	CNN3	middle
NM_001286084	TRMT112	included
NM_001286086	C11orf98	included
NM_001286110	CLN3	excluded
NM_001286272	TPT1	excluded
NM_001286416	SUMO3	multimodal
NM_001286435	NME4	multimodal
NM_001286436	NME4	multimodal
NM_001286487	TMEM87A	multimodal
NM_001286706	UFM1	multimodal
NM_001286773	OCIAD2	excluded
NM_001286789	CBR1	multimodal
NM_001286836	CBWD5	multimodal
NM_001287032	STOML2	multimodal
NM_001287392	COMMD6	excluded
NM_001287434	CCND3	multimodal
NM_001287588	SLC50A1	multimodal
NM_001287592	SLC50A1	multimodal
NM_001287744	FDFT1	excluded
NM_001287747	FDFT1	excluded
NM_001288	CLIC1	middle
NM_001288565	TMEM9	multimodal
NM_001288610	JPT1	multimodal
NM_001288659	METTL9	multimodal
NM_001288660	METTL9	multimodal
NM_001288756	BABAM1	multimodal
NM_001288978	XRCC6	included
NM_001289414	ANAPC11	excluded
NM_001289797	PCBD1	included
NM_001289910	IDH2	multimodal
NM_001290135	EI24	excluded
NM_001290193	MYADM	middle
NM_001290309	CTNNA1	multimodal
NM_001290553	ADIPOR1	middle
NM_001290557	ADIPOR1	middle
NM_001291304	NDUFA5	excluded
NM_001291428	BAX	multimodal
NM_001291430	BAX	included
NM_001291431	BAX	multimodal
NM_001291739	CD24	excluded
NM_001291916	SNRPD1	excluded
NM_001293179	PRSS23	excluded
NM_001293180	PRSS23	excluded
NM_001293213	TUBB	multimodal
NM_001293214	TUBB	multimodal
NM_001294332	SDHA	excluded
NM_001294333	ATP6V0B	included
NM_001297418	HNRNPM	multimodal
NM_001297566	UQCRH	multimodal
NM_001297723	C1orf43	included
NM_001297738	TBCA	included
NM_001300	KLF6	excluded
NM_001300795	UBE2D3	excluded
NM_001300796	RAN	excluded
NM_001300829	CIRBP	excluded
NM_001300888	PBDC1	multimodal
NM_001300900	MRPS34	multimodal
NM_001300901	TCEAL4	multimodal
NM_001300902	CD55	included
NM_001300914	DNAJB1	included
NM_001301020	OAZ1	excluded
NM_001301068	ARL1	excluded
NM_001301076	AP2S1	included
NM_001301241	ARHGDIA	included
NM_001301242	ARHGDIA	included
NM_001301834	C12orf57	included
NM_001301836	C12orf57	included
NM_001302545	AAMP	middle
NM_001303007	DDAH2	multimodal
NM_001303048	MYL12A	multimodal
NM_001303060	TMED4	included
NM_001303062	TMED4	middle
NM_001303114	TUBA1C	multimodal
NM_001303117	TUBA1C	excluded
NM_001303235	ISG20	excluded
NM_001303247	WDR61	multimodal
NM_001303499	CNN2	included
NM_001303507	PPP4C	middle
NM_001304451	PGD	excluded
NM_001305	CLDN4	multimodal
NM_001305043	TMEM59	excluded
NM_001305066	TMEM59	included
NM_001305626	CALM2	middle
NM_001305841	TCEAL4	multimodal
NM_001306	CLDN3	excluded
NM_001306153	CCT5	excluded
NM_001306154	CCT5	excluded
NM_001307	CLDN7	multimodal
NM_001308036	NCBP2	multimodal
NM_001308043	CFLAR	included
NM_001308205	SSR3	excluded
NM_001308396	MRPL43	multimodal
NM_001308824	SF3B1	multimodal
NM_001309861	GNAS	middle
NM_001309883	GNAS	included
NM_001310315	TUBB2A	bimodal
NM_001310326	UBE2T	multimodal
NM_001311	CRIP1	excluded
NM_001311203	CLTA	included
NM_001311311	VKORC1	included
NM_001312653	HIST1H2BK	included
NM_001313858	ARL6IP1	multimodal
NM_001313893	HMGB1	excluded
NM_001313932	CAPZB	included
NM_001313941	RHOA	multimodal
NM_001313993	IGFBP2	multimodal
NM_001314039	DNAJA1	multimodal
NM_001316374	MDH1	multimodal
NM_001317007	S100A16	included
NM_001317008	S100A16	included
NM_001317111	MOB1A	multimodal
NM_001317167	SNRPG	excluded
NM_001317231	MTCH2	excluded
NM_001317783	TSTA3	included
NM_001317856	EIF3CL	excluded
NM_001317897	SMIM14	excluded
NM_001317956	IDI1	excluded
NM_001317968	ARRDC1	included
NM_001317981	RPL26L1	multimodal
NM_001318015	ZDHHC12	multimodal
NM_001318016	ZDHHC12	included
NM_001318020	ZDHHC12	multimodal
NM_001318051	NDUFS4	multimodal
NM_001318058	DMAC1	excluded
NM_001318188	HNRNPK	multimodal
NM_001318236	LAMTOR4	included
NM_001318237	LAMTOR4	included
NM_001318252	C7orf50	included
NM_001318485	MRPL20	included
NM_001318494	TRAPPC4	excluded
NM_001318526	TRAPPC2L	excluded
NM_001318527	TRAPPC2L	excluded
NM_001318770	MRPL14	excluded
NM_001318788	COX4I1	included
NM_001318794	COX4I1	included
NM_001318797	COX4I1	excluded
NM_001318825	HEXA	excluded
NM_001318848	CNPY3	multimodal
NM_001318863	DGUOK	multimodal
NM_001318942	MEA1	included
NM_001319036	COX7A2L	included
NM_001319040	COX7A2L	included
NM_001319068	ITGB1BP1	multimodal
NM_001319081	HMGA1	multimodal
NM_001319086	RUVBL1	included
NM_001319137	CTSH	excluded
NM_001319140	AK2	multimodal
NM_001319157	DYNLRB1	included
NM_001319184	RNPEP	multimodal
NM_001319188	HDGF	multimodal
NM_001319236	RPL34	excluded
NM_001319991	SUPT5H	multimodal
NM_001320194	NACA	included
NM_001320327	CHCHD2	included
NM_001320397	PCNP	multimodal
NM_001320523	SYNGR2	multimodal
NM_001320597	DDX5	excluded
NM_001320628	BOLA2-SMG1P6	multimodal
NM_001320651	U2AF1L5	multimodal
NM_001320778	SCAMP2	multimodal
NM_001320904	DTYMK	multimodal
NM_001320913	FXYD5	multimodal
NM_001320929	GTF2A2	excluded
NM_001320979	AKR7A2	excluded
NM_001321017	UBA52	excluded
NM_001321021	UBA52	excluded
NM_001321170	TECR	middle
NM_001321185	TMC6	multimodal
NM_001321335	SELENOH	excluded
NM_001321367	CD99	included
NM_001321369	CD99	middle
NM_001321421	ARHGDIB	multimodal
NM_001321423	ARHGDIB	multimodal
NM_001321441	AHSA1	included
NM_001321648	NUDT5	excluded
NM_001321688	BZW1	excluded
NM_001321690	BZW1	multimodal
NM_001321704	RPS9	middle
NM_001321845	COMMD4	multimodal
NM_001321970	MRPS11	excluded
NM_001321973	MRPS11	included
NM_001321974	MRPS11	included
NM_001322033	ACTN4	middle
NM_001322086	AHCY	multimodal
NM_001322959	TMEM183A	excluded
NM_001322970	OAT	multimodal
NM_001323011	PMVK	multimodal
NM_001323027	IQCG	included
NM_001323030	IQCG	included
NM_001323069	PFKP	included
NM_001323073	PFKP	included
NM_001323423	RBM39	excluded
NM_001323960	RBCK1	included
NM_001323985	CTNNA1	multimodal
NM_001324303	RPN2	multimodal
NM_001324306	RPN2	multimodal
NM_001329402	VMP1	multimodal
NM_001329417	TMA7	excluded
NM_001329502	GPX1	bimodal
NM_001329503	GPX1	included
NM_001329559	TIMM50	excluded
NM_001329570	NIPSNAP3A	multimodal
NM_001329609	ARL16	included
NM_001329678	PAXX	multimodal
NM_001329722	TMEM54	multimodal
NM_001329752	FAM136A	multimodal
NM_001329921	CALM3	multimodal
NM_001330176	COPRS	multimodal
NM_001330200	RPL19	middle
NM_001330206	MIEN1	excluded
NM_001330269	ATP5MC2	included
NM_001330284	MZT2B	multimodal
NM_001330286	DUT	excluded
NM_001330312	CD9	middle
NM_001330337	CBWD2	excluded
NM_001330393	VEZF1	multimodal
NM_001330421	CYB561	multimodal
NM_001330426	NAGK	excluded
NM_001330469	COPE	excluded
NM_001330536	CENPX	multimodal
NM_001330692	PSMD4	included
NM_001330985	TMEM230	included
NM_001344	DAD1	multimodal
NM_001346500	CD164	excluded
NM_001346663	TK1	included
NM_001346879	POLR2H	included
NM_001347892	TMX2	included
NM_001348065	DCTN2	multimodal
NM_001348129	NBDY	excluded
NM_001348133	CCNI	multimodal
NM_001348957	SMIM26	included
NM_001348958	SMIM26	multimodal
NM_001350968	C7orf50	included
NM_001351263	TSPAN15	excluded
NM_001352773	JUP	multimodal
NM_001352777	JUP	multimodal
NM_001353053	GSN	multimodal
NM_001353264	FAM49B	excluded
NM_001353337	ANKRD36B	multimodal
NM_001353402	NDUFAF8	included
NM_001354457	PLPP5	multimodal
NM_001354845	CCNB1	excluded
NM_001354928	VCP	multimodal
NM_001355006	NPM1	bimodal
NM_001355009	NPM1	included
NM_001355019	PPP2CA	excluded
NM_001355401	NPIPB12	multimodal
NM_001357	DHX9	excluded
NM_001357943	GAPDH	included
NM_001359651	PEF1	multimodal
NM_001362531	CKB	included
NM_001362750	AHCY	middle
NM_001362896	PUF60	included
NM_001363000	THEM6	multimodal
NM_001363602	NDUFS7	included
NM_001363669	CALM1	excluded
NM_001363673	ELOF1	multimodal
NM_001363688	NPC2	included
NM_001363695	PPT1	multimodal
NM_001363697	RPL28	bimodal
NM_001363735	TMED3	included
NM_001363778	SYNGR2	included
NM_001363785	EIF3L	excluded
NM_001363810	VMA21	excluded
NM_001363848	TK1	included
NM_001363860	RPS16	excluded
NM_001363872	PLSCR1	excluded
NM_001363881	HMCES	multimodal
NM_001363887	LRCH3	included
NM_001363963	DERL1	multimodal
NM_001363994	CANX	included
NM_001364007	NOTCH2NLB	excluded
NM_001364008	NOTCH2NLB	excluded
NM_001364013	NOTCH2NLC	excluded
NM_001364126	CLTB	multimodal
NM_001364127	CLTB	bimodal
NM_001364239	HNRNPH1	multimodal
NM_001364683	TPM3	included
NM_001365304	LOC112694756	included
NM_001365717	LRCH3	included
NM_001365719	LRCH3	included
NM_001365754	MIF4GD	bimodal
NM_001365761	MICOS13	included
NM_001365774	ALDH9A1	multimodal
NM_001365776	TPM1	bimodal
NM_001365777	TPM1	multimodal
NM_001365782	TPM1	multimodal
NM_001366292	COX7A2	excluded
NM_001366293	COX7A2	included
NM_001366481	RPL7L1	multimodal
NM_001366643	SAP18	excluded
NM_001366994	IFI27	multimodal
NM_001367837	TPM4	included
NM_001369744	ITGB1BP1	multimodal
NM_001369751	SNRPD2	included
NM_001369752	SNRPD2	included
NM_001369859	PTP4A2	excluded
NM_001370177	NA	multimodal
NM_001370340	NA	excluded
NM_001370345	NA	excluded
NM_001371394	NA	excluded
NM_001371720	NA	multimodal
NM_001371734	NA	excluded
NM_001374178	NA	multimodal
NM_001374326	NA	excluded
NM_001374407	NA	included
NM_001374512	NA	multimodal
NM_001374593	NA	excluded
NM_001375354	NA	multimodal
NM_001375991	NA	included
NM_001376560	NA	multimodal
NM_001376902	NA	multimodal
NM_001377298	NA	multimodal
NM_001377300	NA	included
NM_001377527	NA	multimodal
NM_001378351	NA	multimodal
NM_001378451	NA	multimodal
NM_001378495	NA	multimodal
NM_001379043	NA	excluded
NM_001379366	NA	multimodal
NM_001381852	NA	included
NM_001381911	NA	multimodal
NM_001381943	NA	multimodal
NM_001382003	NA	included
NM_001382225	NA	included
NM_001382293	NA	included
NM_001382294	NA	multimodal
NM_001382365	NA	middle
NM_001382366	NA	multimodal
NM_001382542	NA	multimodal
NM_001382727	NA	multimodal
NM_001382730	NA	multimodal
NM_001384280	NA	included
NM_001384714	NA	excluded
NM_001384982	NA	multimodal
NM_001385254	NA	excluded
NM_001385265	NA	excluded
NM_001385266	NA	excluded
NM_001386740	NA	excluded
NM_001386875	NA	excluded
NM_001387651	NA	multimodal
NM_001387846	NA	excluded
NM_001388314	NA	multimodal
NM_001388318	NA	excluded
NM_001393653	NA	excluded
NM_001393915	NA	multimodal
NM_001393919	NA	multimodal
NM_001394000	NA	multimodal
NM_001394149	NA	excluded
NM_001394674	NA	excluded
NM_001394769	NA	multimodal
NM_001398	ECH1	included
NM_001402	EEF1A1	excluded
NM_001404	EEF1G	included
NM_001418	EIF4G2	included
NM_001424	EMP2	excluded
NM_001487	BLOC1S1	excluded
NM_001537	HSBP1	excluded
NM_001540	HSPB1	multimodal
NM_001554	CCN1	excluded
NM_001618	PARP1	excluded
NM_001636	SLC25A6	multimodal
NM_001647	APOD	excluded
NM_001658	ARF1	included
NM_001660	ARF4	included
NM_001662	ARF5	multimodal
NM_001675	ATF4	included
NM_001677	ATP1B1	multimodal
NM_001679	ATP1B3	excluded
NM_001686	ATP5F1B	included
NM_001687	ATP5F1D	included
NM_001688	ATP5PB	excluded
NM_001731	BTG1	excluded
NM_001743	CALM2	middle
NM_001757	CBR1	multimodal
NM_001777	CD47	excluded
NM_001791	CDC42	excluded
NM_001826	CKS1B	included
NM_001827	CKS2	multimodal
NM_001862	COX5B	excluded
NM_001866	COX7B	excluded
NM_001867	COX7C	excluded
NM_001878	CRABP2	bimodal
NM_001909	CTSD	middle
NM_001914	CYB5A	excluded
NM_001916	CYC1	included
NM_001961	EEF2	middle
NM_001967	EIF4A2	multimodal
NM_001985	ETFB	multimodal
NM_002014	FKBP4	excluded
NM_002085	GPX4	included
NM_002086	GRB2	multimodal
NM_002087	GRN	included
NM_002094	GSPT1	excluded
NM_002097	GTF3A	multimodal
NM_002106	H2AFZ	multimodal
NM_002116	HLA-A	middle
NM_002117	HLA-C	multimodal
NM_002136	HNRNPA1	excluded
NM_002139	RBMX	multimodal
NM_002156	HSPD1	multimodal
NM_002157	HSPE1	excluded
NM_002165	ID1	included
NM_002166	ID2	excluded
NM_002167	ID3	included
NM_002168	IDH2	excluded
NM_002228	JUN	middle
NM_002266	KPNA2	middle
NM_002273	KRT8	included
NM_002276	KRT19	included
NM_002295	RPSA	excluded
NM_002306	LGALS3	multimodal
NM_002337	LRPAP1	excluded
NM_002354	EPCAM	multimodal
NM_002437	MPV17	multimodal
NM_002455	MTX1	multimodal
NM_002488	NDUFA2	multimodal
NM_002489	NDUFA4	excluded
NM_002490	NDUFA6	excluded
NM_002491	NDUFB3	included
NM_002493	NDUFB6	excluded
NM_002534	OAS1	multimodal
NM_002537	OAZ2	multimodal
NM_002567	PEBP1	multimodal
NM_002568	PABPC1	multimodal
NM_002573	PAFAH1B3	included
NM_002629	PGAM1	included
NM_002635	SLC25A3	excluded
NM_002695	POLR2E	excluded
NM_002696	POLR2G	multimodal
NM_002710	PPP1CC	multimodal
NM_002773	PRSS8	multimodal
NM_002787	PSMA2	excluded
NM_002790	PSMA5	excluded
NM_002791	PSMA6	multimodal
NM_002792	PSMA7	multimodal
NM_002793	PSMB1	multimodal
NM_002798	PSMB6	included
NM_002806	PSMC6	excluded
NM_002808	PSMD2	included
NM_002810	PSMD4	multimodal
NM_002811	PSMD7	excluded
NM_002812	PSMD8	multimodal
NM_002815	PSMD11	excluded
NM_002823	PTMA	included
NM_002904	NELFE	excluded
NM_002939	RNH1	included
NM_002947	RPA3	excluded
NM_002948	RPL15	excluded
NM_002949	MRPL12	multimodal
NM_002950	RPN1	excluded
NM_002952	RPS2	multimodal
NM_002965	S100A9	multimodal
NM_002966	S100A10	middle
NM_002970	SAT1	multimodal
NM_002997	SDC1	multimodal
NM_002999	SDC4	multimodal
NM_003000	SDHB	multimodal
NM_003001	SDHC	middle
NM_003009	SELENOW	included
NM_003016	SRSF2	included
NM_003017	SRSF3	excluded
NM_003022	SH3BGRL	included
NM_003079	SMARCE1	excluded
NM_003090	SNRPA1	multimodal
NM_003091	SNRPB	included
NM_003093	SNRPC	middle
NM_003094	SNRPE	excluded
NM_003107	SOX4	excluded
NM_003129	SQLE	excluded
NM_003130	SRI	excluded
NM_003133	SRP9	multimodal
NM_003134	SRP14	excluded
NM_003145	SSR2	multimodal
NM_003168	SUPT4H1	multimodal
NM_003172	SURF1	excluded
NM_003187	TAF9	included
NM_003217	TMBIM6	included
NM_003258	TK1	included
NM_003276	TMPO	multimodal
NM_003295	TPT1	excluded
NM_003299	HSP90B1	multimodal
NM_003311	PHLDA2	excluded
NM_003321	TUFM	excluded
NM_003329	TXN	excluded
NM_003337	UBE2B	excluded
NM_003348	UBE2N	excluded
NM_003352	SUMO1	excluded
NM_003366	UQCRC2	multimodal
NM_003374	VDAC1	included
NM_003379	EZR	included
NM_003407	ZFP36	included
NM_003457	ZNF207	excluded
NM_003491	NAA10	excluded
NM_003495	HIST1H4I	included
NM_003516	HIST2H2AA3	included
NM_003610	RAE1	excluded
NM_003641	IFITM1	multimodal
NM_003676	DEGS1	excluded
NM_003689	AKR7A2	multimodal
NM_003731	SSNA1	included
NM_003754	EIF3F	excluded
NM_003756	EIF3H	excluded
NM_003757	EIF3I	multimodal
NM_003761	VAMP8	multimodal
NM_003776	MRPL40	included
NM_003779	B4GALT3	multimodal
NM_003792	EDF1	included
NM_003795	SNX3	excluded
NM_003801	GPAA1	included
NM_003827	NAPA	multimodal
NM_003860	BANF1	middle
NM_003863	DPM2	multimodal
NM_003897	IER3	included
NM_003915	CPNE1	multimodal
NM_003932	ST13	excluded
NM_003945	ATP6V0E1	excluded
NM_003973	RPL14	excluded
NM_003979	GPRC5A	multimodal
NM_004034	ANXA7	multimodal
NM_004048	B2M	multimodal
NM_004074	COX8A	included
NM_004077	CS	multimodal
NM_004083	DDIT3	included
NM_004092	ECHS1	included
NM_004095	EIF4EBP1	included
NM_004125	DNAJC25-GNG10	middle
NM_004148	NINJ1	multimodal
NM_004161	RAB1A	excluded
NM_004223	UBE2L6	multimodal
NM_004231	ATP6V1F	included
NM_004252	SLC9A3R1	included
NM_004255	COX5A	excluded
NM_004261	SELENOF	multimodal
NM_004280	EEF1E1	excluded
NM_004295	TRAF4	multimodal
NM_004322	BAD	multimodal
NM_004331	BNIP3L	excluded
NM_004335	BST2	multimodal
NM_004339	PTTG1IP	included
NM_004343	CALR	multimodal
NM_004373	COX6A1	included
NM_004374	COX6C	excluded
NM_004393	DAG1	excluded
NM_004394	DAP	included
NM_004417	DUSP1	included
NM_004433	ELF3	excluded
NM_004450	ERH	included
NM_004493	HSD17B10	multimodal
NM_004499	HNRNPAB	multimodal
NM_004501	HNRNPU	excluded
NM_004508	IDI1	excluded
NM_004528	MGST3	excluded
NM_004537	NAP1L1	excluded
NM_004542	NDUFA3	excluded
NM_004544	NDUFA10	excluded
NM_004547	NDUFB4	excluded
NM_004549	NDUFC2	excluded
NM_004551	NDUFS3	included
NM_004593	TRA2B	excluded
NM_004607	TBCA	excluded
NM_004637	RAB7A	multimodal
NM_004663	RAB11A	excluded
NM_004691	ATP6V0D1	multimodal
NM_004699	FAM50A	multimodal
NM_004708	PDCD5	excluded
NM_004710	SYNGR2	included
NM_004712	HGS	included
NM_004713	NEMF	multimodal
NM_004718	COX7A2L	excluded
NM_004800	TM9SF2	excluded
NM_004862	LITAF	multimodal
NM_004888	ATP6V1G1	excluded
NM_004905	PRDX6	excluded
NM_004925	AQP3	multimodal
NM_004926	ZFP36L1	multimodal
NM_004960	FUS	included
NM_004965	HMGN1	included
NM_005001	NDUFA7	excluded
NM_005002	NDUFA9	excluded
NM_005008	SNU13	excluded
NM_005015	OXA1L	excluded
NM_005022	PFN1	middle
NM_005034	POLR2K	multimodal
NM_005101	ISG15	included
NM_005105	RBM8A	excluded
NM_005168	RND3	multimodal
NM_005216	DDOST	multimodal
NM_005252	FOS	multimodal
NM_005313	PDIA3	excluded
NM_005319	HIST1H1C	multimodal
NM_005324	H3F3B	excluded
NM_005327	HADH	multimodal
NM_005340	HINT1	excluded
NM_005347	HSPA5	excluded
NM_005381	NCL	excluded
NM_005439	MLF2	included
NM_005494	DNAJB6	multimodal
NM_005506	SCARB2	excluded
NM_005507	CFL1	middle
NM_005514	HLA-B	multimodal
NM_005516	HLA-E	multimodal
NM_005517	HMGN2	excluded
NM_005524	HES1	multimodal
NM_005556	KRT7	multimodal
NM_005567	LGALS3BP	included
NM_005600	NIT1	multimodal
NM_005614	RHEB	excluded
NM_005620	S100A11	middle
NM_005669	REEP5	excluded
NM_005698	SCAMP3	multimodal
NM_005720	ARPC1B	multimodal
NM_005721	ACTR3	excluded
NM_005722	ACTR2	multimodal
NM_005724	TSPAN3	excluded
NM_005729	PPIF	multimodal
NM_005762	TRIM28	excluded
NM_005765	ATP6AP2	multimodal
NM_005776	CNIH1	excluded
NM_005782	ALYREF	multimodal
NM_005787	ALG3	multimodal
NM_005789	PSME3	excluded
NM_005796	NUTF2	excluded
NM_005801	EIF1	excluded
NM_005803	FLOT1	excluded
NM_005805	PSMD14	multimodal
NM_005809	PRDX2	multimodal
NM_005817	PLIN3	multimodal
NM_005827	SLC35B1	excluded
NM_005837	POP7	included
NM_005849	IGSF6	included
NM_005856	RAMP3	included
NM_005870	SAP18	excluded
NM_005911	MAT2A	included
NM_005953	MT2A	multimodal
NM_005971	FXYD3	excluded
NM_005980	S100P	multimodal
NM_005998	CCT3	included
NM_006003	UQCRFS1	excluded
NM_006012	CLPP	excluded
NM_006013	RPL10	excluded
NM_006014	LAGE3	multimodal
NM_006022	TSC22D1	excluded
NM_006082	TUBA1B	included
NM_006088	TUBB4B	included
NM_006156	NEDD8	included
NM_006164	NFE2L2	multimodal
NM_006184	NUCB1	multimodal
NM_006191	PA2G4	multimodal
NM_006192	PAX1	included
NM_006223	PIN4	excluded
NM_006234	POLR2J	excluded
NM_006265	RAD21	multimodal
NM_006275	SRSF6	multimodal
NM_006304	SEM1	excluded
NM_006327	TIMM23	multimodal
NM_006335	TIMM17A	middle
NM_006337	MCRS1	multimodal
NM_006339	HMG20B	multimodal
NM_006349	ZNHIT1	multimodal
NM_006356	ATP5PD	included
NM_006368	CREB3	multimodal
NM_006396	ZNRD2	excluded
NM_006401	ANP32B	multimodal
NM_006407	ARL6IP5	excluded
NM_006408	AGR2	excluded
NM_006412	AGPAT2	included
NM_006423	RABAC1	included
NM_006428	MRPL28	excluded
NM_006430	CCT4	excluded
NM_006431	CCT2	multimodal
NM_006432	NPC2	multimodal
NM_006435	IFITM2	included
NM_006443	DNPH1	multimodal
NM_006471	MYL12A	multimodal
NM_006476	ATP5MG	excluded
NM_006496	GNAI3	excluded
NM_006519	DYNLT1	multimodal
NM_006579	EBP	included
NM_006597	HSPA8	included
NM_006600	NUDC	excluded
NM_006622	PLK2	multimodal
NM_006636	MTHFD2	excluded
NM_006645	STARD10	multimodal
NM_006694	JTB	excluded
NM_006708	GLO1	multimodal
NM_006713	SUB1	excluded
NM_006743	RBM3	excluded
NM_006761	YWHAE	multimodal
NM_006793	PRDX3	multimodal
NM_006795	EHD1	multimodal
NM_006801	KDELR1	multimodal
NM_006808	SEC61B	multimodal
NM_006811	SERINC3	multimodal
NM_006815	TMED2	multimodal
NM_006816	LMAN2	included
NM_006826	YWHAQ	included
NM_006827	TMED10	excluded
NM_006829	ADIRF	excluded
NM_006830	UQCR11	excluded
NM_006833	COPS6	multimodal
NM_006854	KDELR2	multimodal
NM_006870	DSTN	excluded
NM_006886	ATP5F1E	excluded
NM_006899	IDH3B	included
NM_006907	PYCR1	multimodal
NM_006908	RAC1	excluded
NM_006923	SDF2	middle
NM_006924	SRSF1	excluded
NM_006925	SRSF5	multimodal
NM_006930	SKP1	excluded
NM_006937	SUMO2	excluded
NM_007006	NUDT21	multimodal
NM_007033	RER1	excluded
NM_007065	CDC37	middle
NM_007099	ACP1	multimodal
NM_007104	RPL10A	multimodal
NM_007108	ELOB	excluded
NM_007178	STRAP	multimodal
NM_007208	MRPL3	excluded
NM_007236	CHP1	multimodal
NM_007278	GABARAP	excluded
NM_007285	GABARAPL2	included
NM_007364	TMED3	included
NM_007367	RALY	excluded
NM_012203	GRHPR	included
NM_012319	SLC39A6	multimodal
NM_012321	LSM4	excluded
NM_012322	LSM5	excluded
NM_012325	MAPRE1	middle
NM_012391	SPDEF	multimodal
NM_012394	PFDN2	multimodal
NM_012412	H2AFV	excluded
NM_012433	SF3B1	excluded
NM_012456	TIMM10	multimodal
NM_012458	TIMM13	excluded
NM_012459	TIMM8B	included
NM_012473	TXN2	multimodal
NM_013238	DNAJC15	excluded
NM_013258	PYCARD	multimodal
NM_013336	SEC61A1	included
NM_013349	NENF	excluded
NM_013379	DPP7	included
NM_013387	UQCR10	excluded
NM_013442	STOML2	multimodal
NM_013995	LAMP2	multimodal
NM_014041	SPCS1	excluded
NM_014046	MRPS18B	multimodal
NM_014047	C19orf53	excluded
NM_014050	MRPL42	excluded
NM_014060	MCTS1	excluded
NM_014077	FAM32A	multimodal
NM_014078	MRPL13	excluded
NM_014106	ZNF770	excluded
NM_014172	PHPT1	included
NM_014175	MRPL15	excluded
NM_014182	ORMDL2	excluded
NM_014187	TMEM208	included
NM_014188	SSU72	multimodal
NM_014206	TMEM258	excluded
NM_014220	TM4SF1	included
NM_014222	NDUFA8	included
NM_014225	PPP2R1A	excluded
NM_014248	RBX1	excluded
NM_014255	CNPY2	excluded
NM_014267	C11orf58	excluded
NM_014313	TMEM50A	excluded
NM_014330	PPP1R15A	included
NM_014335	EID1	multimodal
NM_014341	MTCH1	included
NM_014367	FAM162A	excluded
NM_014380	BEX3	included
NM_014394	GHITM	excluded
NM_014399	TSPAN13	multimodal
NM_014402	UQCRQ	excluded
NM_014445	SERP1	multimodal
NM_014455	RNF115	excluded
NM_014463	LSM3	excluded
NM_014501	UBE2S	excluded
NM_014604	TAX1BP3	included
NM_014623	MEA1	included
NM_014624	S100A6	middle
NM_014713	LAPTM4A	multimodal
NM_014736	PCLAF	excluded
NM_014740	EIF4A3	excluded
NM_014752	SPCS2	excluded
NM_014765	TOMM20	multimodal
NM_015051	ERP44	excluded
NM_015161	ARL6IP1	multimodal
NM_015388	YIPF3	included
NM_015391	ANAPC13	multimodal
NM_015392	NPDC1	included
NM_015415	MPC2	excluded
NM_015497	TMEM87A	multimodal
NM_015564	LRRTM2	included
NM_015584	POLDIP2	multimodal
NM_015702	MMADHC	excluded
NM_015853	UBXN1	included
NM_015871	ZNF593	multimodal
NM_015920	RPS27L	excluded
NM_015921	CUTA	excluded
NM_015932	POMP	excluded
NM_015933	TMA7	excluded
NM_015949	GET4	multimodal
NM_015966	ERGIC3	middle
NM_015971	MRPS7	included
NM_016002	SCCPDH	excluded
NM_016022	APH1A	included
NM_016038	SBDS	multimodal
NM_016039	RTRAF	excluded
NM_016047	SF3B6	multimodal
NM_016061	YPEL5	multimodal
NM_016062	CIAO2B	multimodal
NM_016065	MRPS16	multimodal
NM_016068	FIS1	excluded
NM_016070	MRPS23	excluded
NM_016079	CHMP3	multimodal
NM_016085	ATRAID	included
NM_016100	NAA20	multimodal
NM_016127	SARAF	multimodal
NM_016131	RAB10	multimodal
NM_016145	WDR83OS	multimodal
NM_016199	LSM7	multimodal
NM_016200	LSM8	excluded
NM_016208	VPS28	included
NM_016219	MAN1B1	included
NM_016237	ANAPC5	excluded
NM_016275	SELENOT	excluded
NM_016283	AK6	excluded
NM_016286	DCXR	multimodal
NM_016311	ATP5IF1	included
NM_016400	HYPK	excluded
NM_016404	TRMT112	included
NM_016406	UFC1	included
NM_016462	TMEM14C	included
NM_016470	OSER1	excluded
NM_016480	PAIP2	multimodal
NM_016491	MRPL37	multimodal
NM_016494	RNF181	excluded
NM_016497	MRPL51	excluded
NM_016504	MRPL27	included
NM_016520	C9orf78	multimodal
NM_016565	COA4	middle
NM_016592	GNAS	middle
NM_016639	TNFRSF12A	multimodal
NM_016641	GDE1	multimodal
NM_016816	OAS1	multimodal
NM_017491	WDR1	multimodal
NM_017510	TMED9	excluded
NM_017528	BUD23	multimodal
NM_017670	OTUB1	multimodal
NM_017819	TRMT10C	excluded
NM_017823	DUSP23	included
NM_017841	SDHAF2	multimodal
NM_017861	PIGX	excluded
NM_017866	TMEM70	excluded
NM_017896	GID8	excluded
NM_017907	LAMTOR1	multimodal
NM_017914	C19orf24	multimodal
NM_017924	C14orf119	excluded
NM_017971	MRPL20	included
NM_018049	PLEKHJ1	included
NM_018407	LAPTM4B	excluded
NM_018445	SELENOS	middle
NM_018453	EAPP	multimodal
NM_018462	BRK1	excluded
NM_018491	CBWD1	excluded
NM_018648	NOP10	included
NM_018670	MESP1	multimodal
NM_018683	RNF114	middle
NM_018838	NDUFA12	included
NM_018946	NANS	middle
NM_018947	CYCS	excluded
NM_018997	MRPS21	excluded
NM_019026	TMCO1	excluded
NM_019037	EXOSC4	included
NM_019059	TOMM7	included
NM_019107	MYDGF	middle
NM_019613	WDR45B	multimodal
NM_020154	EMC7	bimodal
NM_020202	NIT2	excluded
NM_020307	CCNL1	excluded
NM_020387	RAB25	multimodal
NM_020529	NFKBIA	multimodal
NM_020531	APMAP	included
NM_020532	RTN4	multimodal
NM_020672	S100A14	multimodal
NM_020791	TAOK1	excluded
NM_020992	PDLIM1	multimodal
NM_021009	UBC	included
NM_021029	RPL36A	excluded
NM_021034	IFITM3	multimodal
NM_021095	SLC5A6	multimodal
NM_021103	TMSB10	included
NM_021104	RPL41	excluded
NM_021109	TMSB4X	included
NM_021128	POLR2L	multimodal
NM_021129	PPA1	included
NM_021130	PPIA	excluded
NM_021173	POLD4	excluded
NM_021177	LSM2	multimodal
NM_021203	SRPRB	excluded
NM_021237	SELENOK	excluded
NM_021243	ABRACL	excluded
NM_021709	SIVA1	included
NM_021960	MCL1	multimodal
NM_021999	ITM2B	excluded
NM_022044	SDF2L1	multimodal
NM_022100	MRPS14	excluded
NM_022121	PERP	excluded
NM_022130	GOLPH3	multimodal
NM_022488	ATG3	multimodal
NM_022818	MAP1LC3B	multimodal
NM_022873	IFI6	multimodal
NM_022877	SMN2	multimodal
NM_023080	C8orf33	multimodal
NM_023934	FUNDC2	excluded
NM_023935	DDRGK1	excluded
NM_023936	MRPS34	multimodal
NM_024026	MRPL57	excluded
NM_024038	TRIR	included
NM_024051	GGCT	multimodal
NM_024071	ZFYVE21	included
NM_024092	TMEM109	multimodal
NM_024112	C9orf16	multimodal
NM_024348	DCTN3	included
NM_024592	SRD5A3	excluded
NM_024613	PLEKHF2	multimodal
NM_025124	TMEM134	excluded
NM_025146	NAA50	excluded
NM_030789	HM13	middle
NM_030811	MRPS26	included
NM_030916	NECTIN4	multimodal
NM_030939	C6orf62	multimodal
NM_030978	ARPC5L	multimodal
NM_030981	RAB1B	included
NM_031243	HNRNPA2B1	excluded
NM_031263	HNRNPK	multimodal
NM_031286	SH3BGRL3	included
NM_031287	SF3B5	bimodal
NM_031298	EMC6	bimodal
NM_031308	EPPK1	multimodal
NM_031314	HNRNPC	excluded
NM_031370	HNRNPD	excluded
NM_031372	HNRNPDL	excluded
NM_031420	MRPL9	included
NM_031452	RAMAC	multimodal
NM_031844	HNRNPU	excluded
NM_031903	MRPL32	multimodal
NM_031991	PTBP1	multimodal
NM_032014	MRPS24	included
NM_032112	MRPL43	included
NM_032193	RNASEH2C	excluded
NM_032231	CIAO2A	multimodal
NM_032272	MAF1	multimodal
NM_032286	MED10	multimodal
NM_032302	PSMG3	multimodal
NM_032306	ALKBH7	excluded
NM_032338	LLPH	excluded
NM_032339	MIEN1	excluded
NM_032350	C7orf50	included
NM_032353	VPS25	multimodal
NM_032360	ACBD6	multimodal
NM_032361	THOC3	excluded
NM_032366	METTL26	multimodal
NM_032412	CYSTM1	multimodal
NM_032476	MRPS6	multimodal
NM_032477	MRPL41	included
NM_032479	MRPL36	included
NM_032574	DPY30	multimodal
NM_032656	DHX37	multimodal
NM_032667	BSCL2	multimodal
NM_032731	TXNDC17	excluded
NM_032773	LRCH3	included
NM_032901	COX14	included
NM_032906	PYURF	included
NM_032989	BAD	multimodal
NM_033318	SMDT1	excluded
NM_033362	MRPS12	multimodal
NM_033363	MRPS12	included
NM_033504	TMEM54	multimodal
NM_033546	MYL12B	excluded
NM_033630	SCAND1	included
NM_033643	RPL36	excluded
NM_033668	ITGB1	multimodal
NM_044472	CDC42	included
NM_052844	WDR34	middle
NM_052850	GADD45GIP1	excluded
NM_052886	MAL2	multimodal
NM_052951	DNTTIP1	multimodal
NM_053050	MRPL53	included
NM_053056	CCND1	multimodal
NM_053275	RPLP0	multimodal
NM_054014	FKBP1A	included
NM_054016	SRSF10	excluded
NM_080593	HIST1H2BK	included
NM_080626	BRI3BP	multimodal
NM_080648	APEX1	included
NM_080652	TMEM41A	excluded
NM_080821	FAM210B	multimodal
NM_130786	A1BG	excluded
NM_133639	RHOV	multimodal
NM_134265	WSB1	excluded
NM_138288	SPTSSA	excluded
NM_138446	MALSU1	excluded
NM_138610	H2AFY	bimodal
NM_138689	PPP1R14B	multimodal
NM_138764	BAX	multimodal
NM_138820	HIGD2A	included
NM_138924	GAMT	included
NM_139062	CSNK1D	excluded
NM_139323	YWHAB	multimodal
NM_144578	MAPK1IP1L	excluded
NM_144772	NAXE	excluded
NM_145169	SFT2D1	excluded
NM_145252	ZG16B	multimodal
NM_145330	MRPL33	multimodal
NM_145729	MRPL24	multimodal
NM_145792	MGST1	multimodal
NM_148912	ABHD11	multimodal
NM_148919	PSMB8	included
NM_148976	PSMA1	multimodal
NM_152285	ARRDC1	multimodal
NM_152685	SLC23A1	included
NM_152766	TMEM256	multimodal
NM_152862	ARPC2	excluded
NM_153001	PSMC4	excluded
NM_153200	EDF1	included
NM_153201	HSPA8	included
NM_153280	UBA1	multimodal
NM_153373	PHYKPL	bimodal
NM_153824	PYCR1	included
NM_170679	SKP1	excluded
NM_170708	LMNA	multimodal
NM_170739	MRPL11	excluded
NM_172251	MRPL54	multimodal
NM_173614	NOMO2	multimodal
NM_174886	TGIF1	excluded
NM_174909	TMEM167A	excluded
NM_175732	PTPMT1	excluded
NM_175932	PSMD13	included
NM_176783	PSME1	included
NM_177534	SULT1A1	excluded
NM_177542	SNRPD2	included
NM_177543	PLPP2	included
NM_177552	SULT1A3	multimodal
NM_177925	H2AFJ	included
NM_177983	PPM1G	included
NM_178190	ATP5IF1	included
NM_178191	ATP5IF1	included
NM_178578	PSMF1	excluded
NM_178582	HM13	included
NM_180982	MRPL52	excluded
NM_181462	MRPL55	multimodal
NM_181466	EIF6	included
NM_181468	EIF6	included
NM_181528	NAA20	multimodal
NM_181652	PRDX5	multimodal
NM_181800	UBE2C	multimodal
NM_181836	TMED7	multimodal
NM_181843	NUDT8	multimodal
NM_182649	PCNA	excluded
NM_182685	EFNA1	multimodal
NM_182776	MCM7	multimodal
NM_182810	ATF4	included
NM_182917	EIF4G1	multimodal
NM_183057	VPS28	included
NM_183237	RNF7	excluded
NM_183241	PAXX	multimodal
NM_183425	RBM38	multimodal
NM_184043	ALDOA	included
NM_194261	UBE2I	excluded
NM_194326	RPS19BP1	included
NM_194434	VAPA	excluded
NM_197955	C15orf48	excluded
NM_197966	BID	excluded
NM_198057	TSC22D3	bimodal
NM_198175	NME1	multimodal
NM_198242	EIF4G1	multimodal
NM_198426	CHMP2A	multimodal
NM_198536	TMEM205	multimodal
NM_198590	BSG	multimodal
NM_198591	BSG	multimodal
NM_198883	MTX1	multimodal
NM_198976	NELFCD	multimodal
NM_199074	NDUFAF3	excluded
NM_199184	DNPH1	included
NM_201384	PLEC	multimodal
NM_201397	GPX1	bimodal
NM_201429	RTN3	multimodal
NM_203298	CHCHD1	excluded
NM_203401	STMN1	excluded
NM_203458	NOTCH2NLA	excluded
NM_203464	AK4	excluded
NM_206917	BEX3	multimodal
NM_206918	DEGS2	excluded
NM_207047	ENSA	multimodal
NM_207168	ENSA	included
NM_212460	ARL4A	excluded
NM_212552	BOLA3	excluded
NM_213725	RPLP1	excluded
NR_001317	HCG4B	included
NR_001434	HLA-H	included
NR_001445	RN7SK	multimodal
NR_002201	FTH1P3	included
NR_002308	UQCRBP1	multimodal
NR_002315	H3F3AP4	excluded
NR_002453	SMG1P5	multimodal
NR_002454	LOC606724	included
NR_002556	LOC388242	multimodal
NR_002594	SLC7A5P2	included
NR_002715	RN7SL1	multimodal
NR_002985	SNORA58	included
NR_002988	SNORA74B	included
NR_003010	SCARNA12	included
NR_003015	SNORA53	included
NR_003189	SYS1-DBNDD2	included
NR_003225	LGALS3	multimodal
NR_003573	ANXA2P2	multimodal
NR_003605	ZFAS1	middle
NR_023358	SCARNA9L	included
NR_024206	CYTOR	multimodal
NR_024373	MIR4435-2HG	multimodal
NR_024454	NDUFB2-AS1	excluded
NR_024456	LOC100190986	multimodal
NR_024629	IDI2-AS1	included
NR_026712	RPL13AP5	included
NR_027155	SMG1P3	multimodal
NR_027168	SNHG29	included
NR_027260	RN7SL2	multimodal
NR_027406	LOC100129034	multimodal
NR_027418	LINC00674	excluded
NR_027645	ATP1A1-AS1	bimodal
NR_028052	NGRN	included
NR_028323	SLC5A6	multimodal
NR_028370	PCNA-AS1	multimodal
NR_028443	SLC25A5-AS1	excluded
NR_028510	TYRO3P	included
NR_029378	LOC100289511	excluded
NR_029426	SMA4	multimodal
NR_029434	PSMA3-AS1	included
NR_031762	HCP5B	included
NR_033343	PSCA	multimodal
NR_034041	SRSF1	excluded
NR_034106	CRNDE	excluded
NR_037600	LINC01578	excluded
NR_037608	SLX1A-SULT1A3	multimodal
NR_037609	SLX1B-SULT1A4	multimodal
NR_037673	SERF2-C15ORF63	excluded
NR_037688	ACTG1	multimodal
NR_037717	RNASEK-C17orf49	multimodal
NR_037926	SENP3-EIF4A1	excluded
NR_037928	P2RX5-TAX1BP3	included
NR_037969	SRD5A3-AS1	multimodal
NR_038111	SNHG16	middle
NR_038193	METTL23	multimodal
NR_038286	PSMD6-AS2	included
NR_038322	MAP3K13	excluded
NR_038410	TSPOAP1-AS1	excluded
NR_038894	CBR3-AS1	included
NR_040049	SDCBP2-AS1	included
NR_045586	SRA1	excluded
NR_046413	POLD4	excluded
NR_046633	NUCB1-AS1	included
NR_046853	HM13-AS1	included
NR_049759	IFITM3	multimodal
NR_051984	PRC1-AS1	included
NR_073084	CRIP2	included
NR_073412	TMEM134	multimodal
NR_073609	PDCD6	included
NR_077246	RPS14P3	bimodal
NR_102318	ACTR3	excluded
NR_102400	PYCARD-AS1	excluded
NR_102427	CIB1	included
NR_103560	GSN-AS1	multimodal
NR_103819	SNRPD3	excluded
NR_104029	DGUOK-AS1	included
NR_104165	MDH2	included
NR_104454	TMEM14B	multimodal
NR_109828	PCBP2-OT1	included
NR_109875	LOC101927100	bimodal
NR_109878	LINC01726	included
NR_110009	ADNP-AS1	included
NR_110044	LOC101926943	excluded
NR_110578	CSNK1D	excluded
NR_110730	PTOV1-AS2	multimodal
NR_120608	TUBB	multimodal
NR_130143	LOC104968399	included
NR_132776	SNORA94	bimodal
NR_133645	S100A16	included
NR_134538	C7orf50	bimodal
NR_134671	TRAPPC2L	excluded
NR_134848	GAA	multimodal
NR_134869	HEXA	included
NR_135305	SMG1P2	multimodal
NR_135587	DPY30	middle
NR_136278	LOC105375713	included
NR_136587	RBM39	included
NR_138060	ARL16	included
NR_144447	ZNF8-ERVK3-1	included
NR_144567	MALAT1	included
NR_145425	RUSC1-AS1	included
NR_145721	SNORA74C-1	included
NR_145819	RNA45SN1	excluded
NR_145820	RNA18SN1	middle
NR_145822	RNA28SN1	multimodal
NR_146063	SMIM27	included
NR_146144	RNA45SN2	excluded
NR_146146	RNA18SN2	middle
NR_146148	RNA28SN2	multimodal
NR_146151	RNA45SN3	excluded
NR_146152	RNA18SN3	middle
NR_146154	RNA28SN3	multimodal
NR_146274	KRT7-AS	included
NR_146472	ELF3-AS1	multimodal
NR_146967	C7orf50	included
NR_147233	TPM1-AS	multimodal
NR_148712	ENOSF1	included
NR_155756	TBCB	multimodal
NR_157088	CLTB	multimodal
NR_157580	LOC440292	excluded
NR_158216	LOC105370687	excluded
NR_160308	GCNT7	included
NR_160400	TIMM8B	included
NR_160950	SNHG32	multimodal
NR_163478	NA	excluded
NR_163943	NA	excluded
NR_171558	NA	included
NR_171559	NA	included
NR_171562	NA	included
