# Supplementary material for: Specific alternative splicing and polyadenylation facilitate metastasis mediated by CTC clusters
Source: Research Square preprint supplement (doi:10.21203/rs.3.rs-1128296/v1), 2021-12-07
Supplement: Supplementary file 7 [file c13fd584f83ad46ba92c03d1.xlsx]

## Sheet: SRP131647_SingleCTCs
Table S1. The modality of AS events in single CTCs and CTC clusters
ASE_ID	Gene_Symbol	Modality
isoform1=junction:chr10:100986976-100987312:-|isoform2=junction:chr10:100987197-100987312:-@exon:chr10:100987090-100987196:-@junction:chr10:100986976-100987089:-	MRPL43	included
isoform1=junction:chr10:102481173-102482000:-|isoform2=junction:chr10:102481899-102482000:-@exon:chr10:102481837-102481898:-@junction:chr10:102481173-102481836:-	ACTR1A	included
isoform1=junction:chr10:103392467-103396408:-|isoform2=junction:chr10:103394395-103396408:-@exon:chr10:103394199-103394394:-@junction:chr10:103392467-103394198:-	USMG5	excluded
isoform1=junction:chr10:104259799-104266083:+|isoform2=junction:chr10:104259799-104262978:+@exon:chr10:104262979-104263077:+@junction:chr10:104263078-104266083:+	GSTO1	included
isoform1=junction:chr10:118336424-118342269:-|isoform2=junction:chr10:118341928-118342269:-@exon:chr10:118341727-118341927:-@junction:chr10:118336424-118341726:-	FAM204A	multimodal
isoform1=junction:chr10:119060845-119065398:-|isoform2=junction:chr10:119061329-119065398:-@exon:chr10:119061224-119061328:-@junction:chr10:119060845-119061223:-	EIF3A	included
isoform1=junction:chr10:14935565-14939809:-|isoform2=junction:chr10:14936594-14939809:-@exon:chr10:14936538-14936593:-@junction:chr10:14935565-14936537:-	DCLRE1C	bimodal
isoform1=junction:chr10:22318169-22318652:+|isoform2=junction:chr10:22318169-22318271:+@exon:chr10:22318272-22318306:+@junction:chr10:22318307-22318652:+	COMMD3	bimodal
isoform1=junction:chr10:26770346-26777064:-|isoform2=junction:chr10:26771090-26777064:-@exon:chr10:26771075-26771089:-@junction:chr10:26770346-26771074:-	ABI1	excluded
isoform1=junction:chr10:27509931-27532506:+|isoform2=junction:chr10:27509931-27526827:+@exon:chr10:27526828-27526889:+@junction:chr10:27526890-27532506:+	RAB18	included
isoform1=junction:chr10:32935559-32958144:-|isoform2=junction:chr10:32953810-32958144:-@exon:chr10:32953593-32953809:-@junction:chr10:32935559-32953592:-	ITGB1	excluded
isoform1=junction:chr10:37216395-37218979:+|isoform2=junction:chr10:37216395-37217694:+@exon:chr10:37217695-37217878:+@junction:chr10:37217879-37218979:+	ANKRD30A	multimodal
isoform1=junction:chr10:3779591-3781640:-|isoform2=junction:chr10:3780230-3781640:-@exon:chr10:3780106-3780229:-@junction:chr10:3779591-3780105:-	KLF6	included
isoform1=junction:chr10:3782215-3784912:-|isoform2=junction:chr10:3783282-3784912:-@exon:chr10:3783216-3783281:-@junction:chr10:3782215-3783215:-	KLF6	excluded
isoform1=junction:chr10:4998748-5000549:-|isoform2=junction:chr10:4999278-5000549:-@exon:chr10:4999200-4999277:-@junction:chr10:4998748-4999199:-	AKR1C2	bimodal
isoform1=junction:chr10:5786051-5796762:-|isoform2=junction:chr10:5795020-5796762:-@exon:chr10:5794885-5795019:-@junction:chr10:5786051-5794884:-	GDI2	included
isoform1=junction:chr10:58361402-58363608:+|isoform2=junction:chr10:58361402-58361494:+@exon:chr10:58361495-58361526:+@junction:chr10:58361527-58363608:+	UBE2D1	included
isoform1=junction:chr10:60785788-60791889:+|isoform2=junction:chr10:60785788-60788059:+@exon:chr10:60788060-60788230:+@junction:chr10:60788231-60791889:+	CDK1	included
isoform1=junction:chr10:63217332-63264650:-|isoform2=junction:chr10:63219984-63264650:-@exon:chr10:63219878-63219983:-@junction:chr10:63217332-63219877:-	JMJD1C	multimodal
isoform1=junction:chr10:63217332-63268662:-|isoform2=junction:chr10:63264765-63268662:-@exon:chr10:63264651-63264764:-@junction:chr10:63217332-63264650:-	JMJD1C	multimodal
isoform1=junction:chr10:63521578-63594777:+|isoform2=junction:chr10:63521578-63566337:+@exon:chr10:63566338-63566410:+@junction:chr10:63566411-63594777:+	REEP3	included
isoform1=junction:chr10:68337334-68338502:+|isoform2=junction:chr10:68337334-68337857:+@exon:chr10:68337858-68337996:+@junction:chr10:68337997-68338502:+	HNRNPH3	multimodal
isoform1=junction:chr10:68337334-68339139:+|isoform2=junction:chr10:68337334-68338502:+@exon:chr10:68338503-68338642:+@junction:chr10:68338643-68339139:+	HNRNPH3	multimodal
isoform1=junction:chr10:68337334-68339139:+|isoform2=junction:chr10:68337334-68338502:+@exon:chr10:68338503-68338687:+@junction:chr10:68338688-68339139:+	HNRNPH3	multimodal
isoform1=junction:chr10:68737049-68740628:+|isoform2=junction:chr10:68737049-68737844:+@exon:chr10:68737845-68737889:+@junction:chr10:68737890-68740628:+	CCAR1	included
isoform1=junction:chr10:68755537-68757293:+|isoform2=junction:chr10:68755537-68756272:+@exon:chr10:68756273-68756483:+@junction:chr10:68756484-68757293:+	CCAR1	multimodal
isoform1=junction:chr10:69088237-69103870:+|isoform2=junction:chr10:69088237-69097083:+@exon:chr10:69097084-69097231:+@junction:chr10:69097232-69103870:+	SRGN	included
isoform1=junction:chr10:71822008-71825836:-|isoform2=junction:chr10:71823897-71825836:-@exon:chr10:71823888-71823896:-@junction:chr10:71822008-71823887:-	PSAP	multimodal
isoform1=junction:chr10:73911613-73912214:+|isoform2=junction:chr10:73911613-73912040:+@exon:chr10:73912041-73912068:+@junction:chr10:73912069-73912214:+	PLAU	included
isoform1=junction:chr10:86968606-86970475:+|isoform2=junction:chr10:86968606-86970199:+@exon:chr10:86970200-86970262:+@junction:chr10:86970263-86970475:+	ADIRF	included
isoform1=junction:chr10:87715844-87727283:+|isoform2=junction:chr10:87715844-87721755:+@exon:chr10:87721756-87721770:+@junction:chr10:87721771-87727283:+	PAPSS2	excluded
isoform1=junction:chr10:92311338-92349348:+|isoform2=junction:chr10:92311338-92340672:+@exon:chr10:92340673-92340803:+@junction:chr10:92340804-92349348:+	MARCH5	bimodal
isoform1=junction:chr10:95238686-95263863:-|isoform2=junction:chr10:95247367-95263863:-@exon:chr10:95247215-95247366:-@junction:chr10:95238686-95247214:-	PDLIM1	bimodal
isoform1=junction:chr10:95268863-95290819:-|isoform2=junction:chr10:95271785-95290819:-@exon:chr10:95271633-95271784:-@junction:chr10:95268863-95271632:-	PDLIM1	included
isoform1=junction:chr1:108692868-108695701:+|isoform2=junction:chr1:108692868-108693589:+@exon:chr1:108693590-108693642:+@junction:chr1:108693643-108695701:+	PRPF38B	multimodal
isoform1=junction:chr1:108696338-108698603:+|isoform2=junction:chr1:108696338-108697946:+@novel_exon:chr1:108697947-108698017:+@junction:chr1:108698018-108698603:+	PRPF38B	bimodal
isoform1=junction:chr1:109236549-109237243:+|isoform2=junction:chr1:109236549-109236804:+@exon:chr1:109236805-109236870:+@junction:chr1:109236871-109237243:+	SARS	excluded
isoform1=junction:chr1:110406380-110407585:-|isoform2=junction:chr1:110407129-110407585:-@exon:chr1:110407033-110407128:-@junction:chr1:110406380-110407032:-	LAMTOR5	excluded
isoform1=junction:chr11:10801088-10802048:-|isoform2=junction:chr11:10801775-10802048:-@exon:chr11:10801661-10801774:-@junction:chr11:10801088-10801660:-	EIF4G2	included
isoform1=junction:chr11:108134317-108138897:+|isoform2=junction:chr11:108134317-108135141:+@exon:chr11:108135142-108135242:+@junction:chr11:108135243-108138897:+	ACAT1	bimodal
isoform1=junction:chr1:111120694-111126226:-|isoform2=junction:chr1:111124882-111126226:-@exon:chr1:111124742-111124881:-@junction:chr1:111120694-111124741:-	DRAM2	included
isoform1=junction:chr1:111441390-111442024:-|isoform2=junction:chr1:111441605-111442024:-@exon:chr1:111441499-111441604:-@junction:chr1:111441390-111441498:-	WDR77	multimodal
isoform1=junction:chr1:111449874-111456085:+|isoform2=junction:chr1:111449874-111454210:+@exon:chr1:111454211-111454356:+@junction:chr1:111454357-111456085:+	ATP5F1	included
isoform1=junction:chr11:118572551-118583178:+|isoform2=junction:chr11:118572551-118581245:+@exon:chr11:118581246-118581509:+@junction:chr11:118581510-118583178:+	ARCN1	included
isoform1=junction:chr11:123060269-123061119:-|isoform2=junction:chr11:123060799-123061119:-@exon:chr11:123060593-123060798:-@junction:chr11:123060269-123060592:-	HSPA8	included
isoform1=junction:chr1:112703807-112707077:-|isoform2=junction:chr1:112705124-112707077:-@exon:chr1:112705100-112705123:-@junction:chr1:112703807-112705099:-	RHOC	multimodal
isoform1=junction:chr1:112703807-112707077:-|isoform2=junction:chr1:112705124-112707077:-@novel_exon:chr1:112705053-112705123:-@junction:chr1:112703807-112705052:-	RHOC	excluded
isoform1=junction:chr1:112703807-112707077:-|isoform2=junction:chr1:112705169-112707077:-@exon:chr1:112705053-112705168:-@junction:chr1:112703807-112705052:-	RHOC	multimodal
isoform1=junction:chr1:112703807-112707077:-|isoform2=junction:chr1:112705169-112707077:-@exon:chr1:112705100-112705168:-@junction:chr1:112703807-112705099:-	RHOC	multimodal
isoform1=junction:chr11:16744685-16752784:+|isoform2=junction:chr11:16744685-16748096:+@exon:chr11:16748097-16748157:+@junction:chr11:16748158-16752784:+	C11orf58	included
isoform1=junction:chr11:16748158-16754870:+|isoform2=junction:chr11:16748158-16752784:+@exon:chr11:16752785-16752894:+@junction:chr11:16752895-16754870:+	C11orf58	included
isoform1=junction:chr1:117153370-117170106:-|isoform2=junction:chr1:117156922-117170106:-@exon:chr1:117156574-117156921:-@junction:chr1:117153370-117156573:-	VTCN1	included
isoform1=junction:chr11:17282944-17295323:+|isoform2=junction:chr11:17282944-17286633:+@exon:chr11:17286634-17286717:+@junction:chr11:17286718-17295323:+	NUCB2	bimodal
isoform1=junction:chr11:18516165-18526774:-|isoform2=junction:chr11:18519604-18526774:-@exon:chr11:18519519-18519603:-@junction:chr11:18516165-18519518:-	TSG101	included
isoform1=junction:chr1:119752675-119755426:-|isoform2=junction:chr1:119753387-119755426:-@exon:chr1:119753280-119753386:-@junction:chr1:119752675-119753279:-	HMGCS2	included
isoform1=junction:chr11:239077-244160:+|isoform2=junction:chr11:239077-244040:+@exon:chr11:244041-244075:+@junction:chr11:244076-244160:+	PSMD13	included
isoform1=junction:chr11:3039932-3040895:-|isoform2=junction:chr11:3040582-3040895:-@exon:chr11:3040448-3040581:-@junction:chr11:3039932-3040447:-	CARS	bimodal
isoform1=junction:chr11:319991-320564:-|isoform2=junction:chr11:320249-320564:-@exon:chr11:320113-320248:-@junction:chr11:319991-320112:-	IFITM3	excluded
isoform1=junction:chr11:33722464-33736381:-|isoform2=junction:chr11:33731469-33736381:-@exon:chr11:33731424-33731468:-@junction:chr11:33722464-33731423:-	CD59	excluded
isoform1=junction:chr11:34090679-34096478:+|isoform2=junction:chr11:34090679-34091905:+@exon:chr11:34091906-34092056:+@junction:chr11:34092057-34096478:+	CAPRIN1	included
isoform1=junction:chr11:35190066-35209964:+|isoform2=junction:chr11:35190066-35208104:+@exon:chr11:35208105-35208206:+@junction:chr11:35208207-35209964:+	CD44	included
isoform1=junction:chr11:35190066-35214851:+|isoform2=junction:chr11:35190066-35209964:+@exon:chr11:35209965-35210054:+@junction:chr11:35210055-35214851:+	CD44	excluded
isoform1=junction:chr11:35210055-35214851:+|isoform2=junction:chr11:35210055-35211245:+@exon:chr11:35211246-35211449:+@junction:chr11:35211450-35214851:+	CD44	included
isoform1=junction:chr11:47565987-47571470:+|isoform2=junction:chr11:47565987-47569699:+@exon:chr11:47569700-47569891:+@junction:chr11:47569892-47571470:+	NDUFS3	multimodal
isoform1=junction:chr11:47629047-47631035:-|isoform2=junction:chr11:47630615-47631035:-@exon:chr11:47630555-47630614:-@junction:chr11:47629047-47630554:-	MTCH2	included
isoform1=junction:chr11:47634735-47638698:-|isoform2=junction:chr11:47635572-47638698:-@exon:chr11:47635545-47635571:-@junction:chr11:47634735-47635544:-	MTCH2	included
isoform1=junction:chr1:150267790-150268697:-|isoform2=junction:chr1:150268128-150268697:-@exon:chr1:150267957-150268127:-@junction:chr1:150267790-150267956:-	APH1A	included
isoform1=junction:chr1:150325882-150328319:+|isoform2=junction:chr1:150325882-150327556:+@exon:chr1:150327557-150327652:+@junction:chr1:150327653-150328319:+	PRPF3	multimodal
isoform1=junction:chr1:150577492-150578842:-|isoform2=junction:chr1:150578492-150578842:-@exon:chr1:150578244-150578491:-@junction:chr1:150577492-150578243:-	MCL1	multimodal
isoform1=junction:chr1:151055994-151059478:-|isoform2=junction:chr1:151056787-151059478:-@exon:chr1:151056651-151056786:-@junction:chr1:151055994-151056650:-	CDC42SE1	excluded
isoform1=junction:chr1:151055994-151059478:-|isoform2=junction:chr1:151056787-151059478:-@exon:chr1:151056656-151056786:-@junction:chr1:151055994-151056655:-	CDC42SE1	excluded
isoform1=junction:chr1:153544810-153545752:-|isoform2=junction:chr1:153545519-153545752:-@exon:chr1:153545470-153545518:-@junction:chr1:153544810-153545469:-	S100A4	excluded
isoform1=junction:chr1:153561592-153563733:-|isoform2=junction:chr1:153563537-153563733:-@exon:chr1:153563415-153563536:-@junction:chr1:153561592-153563414:-	S100A2	excluded
isoform1=junction:chr1:153615023-153615828:-|isoform2=junction:chr1:153615382-153615828:-@exon:chr1:153615235-153615381:-@junction:chr1:153615023-153615234:-	S100A14	included
isoform1=junction:chr1:153975906-153976975:-|isoform2=junction:chr1:153976776-153976975:-@exon:chr1:153976693-153976775:-@junction:chr1:153975906-153976692:-	JTB	included
isoform1=junction:chr1:153982809-153983520:-|isoform2=junction:chr1:153983297-153983520:-@exon:chr1:153983219-153983296:-@junction:chr1:153982809-153983218:-	RAB13	included
isoform1=junction:chr1:153990803-153991114:+|isoform2=junction:chr1:153990803-153990913:+@exon:chr1:153990914-153991034:+@junction:chr1:153991035-153991114:+	RPS27	excluded
isoform1=junction:chr1:154157722-154170399:-|isoform2=junction:chr1:154169384-154170399:-@exon:chr1:154169305-154169383:-@junction:chr1:154157722-154169304:-	TPM3	excluded
isoform1=junction:chr1:154171489-154172907:-@exon:chr1:154171413-154171488:-@junction:chr1:154170712-154171412:-|isoform2=junction:chr1:154172105-154172907:-@exon:chr1:154172029-154172104:-@junction:chr1:154170712-154172028:-	TPM3	included
isoform1=junction:chr1:154173202-154182987:-|isoform2=junction:chr1:154176249-154182987:-@exon:chr1:154176115-154176248:-@junction:chr1:154173202-154176114:-	TPM3	included
isoform1=junction:chr1:154212625-154214456:-|isoform2=junction:chr1:154213947-154214456:-@exon:chr1:154213893-154213946:-@junction:chr1:154212625-154213892:-	C1orf43	included
isoform1=junction:chr1:154214575-154220341:-|isoform2=junction:chr1:154219938-154220341:-@exon:chr1:154219836-154219937:-@junction:chr1:154214575-154219835:-	C1orf43	multimodal
isoform1=junction:chr1:155052778-155053909:+|isoform2=junction:chr1:155052778-155053416:+@exon:chr1:155053417-155053493:+@junction:chr1:155053494-155053909:+	ADAM15	included
isoform1=junction:chr1:155053989-155054313:+|isoform2=junction:chr1:155053989-155054149:+@exon:chr1:155054150-155054226:+@junction:chr1:155054227-155054313:+	ADAM15	included
isoform1=junction:chr1:155131635-155133729:+|isoform2=junction:chr1:155131635-155133502:+@exon:chr1:155133503-155133568:+@junction:chr1:155133569-155133729:+	EFNA1	multimodal
isoform1=junction:chr1:155136377-155137560:+|isoform2=junction:chr1:155136377-155136827:+@exon:chr1:155136828-155136951:+@junction:chr1:155136952-155137560:+	SLC50A1	included
isoform1=junction:chr1:155136952-155137978:+|isoform2=junction:chr1:155136952-155137560:+@exon:chr1:155137561-155137722:+@junction:chr1:155137723-155137978:+	SLC50A1	included
isoform1=junction:chr1:155187375-155187721:-|isoform2=junction:chr1:155187577-155187721:-@exon:chr1:155187455-155187576:-@junction:chr1:155187375-155187454:-	MUC1	included
isoform1=junction:chr1:155210628-155212384:+|isoform2=junction:chr1:155210628-155212126:+@exon:chr1:155212127-155212219:+@junction:chr1:155212220-155212384:+	MTX1	included
isoform1=junction:chr1:155260660-155262085:-|isoform2=junction:chr1:155261735-155262085:-@exon:chr1:155261657-155261734:-@junction:chr1:155260660-155261656:-	SCAMP3	multimodal
isoform1=junction:chr1:155308966-155310042:+|isoform2=junction:chr1:155308966-155309788:+@exon:chr1:155309789-155309965:+@junction:chr1:155309966-155310042:+	FDPS	multimodal
isoform1=junction:chr1:155308966-155310063:+|isoform2=junction:chr1:155308966-155309752:+@exon:chr1:155309753-155309965:+@junction:chr1:155309966-155310063:+	FDPS	excluded
isoform1=junction:chr1:155308966-155310063:+|isoform2=junction:chr1:155308966-155309788:+@exon:chr1:155309789-155309965:+@junction:chr1:155309966-155310063:+	FDPS	excluded
isoform1=junction:chr1:155308966-155312254:+|isoform2=junction:chr1:155308966-155310042:+@exon:chr1:155310043-155310205:+@junction:chr1:155310206-155312254:+	FDPS	included
isoform1=junction:chr1:155308966-155312254:+|isoform2=junction:chr1:155308966-155310063:+@exon:chr1:155310064-155310205:+@junction:chr1:155310206-155312254:+	FDPS	included
isoform1=junction:chr1:155318292-155318855:+|isoform2=junction:chr1:155318292-155318664:+@exon:chr1:155318665-155318753:+@junction:chr1:155318754-155318855:+	FDPS	included
isoform1=junction:chr1:155319689-155320408:+|isoform2=junction:chr1:155319689-155319793:+@exon:chr1:155319794-155319928:+@junction:chr1:155319929-155320408:+	FDPS	included
isoform1=junction:chr1:156055426-156058314:+|isoform2=junction:chr1:156055426-156057977:+@exon:chr1:156057978-156058067:+@junction:chr1:156058068-156058314:+	LAMTOR2	included
isoform1=junction:chr1:156061444-156068269:+|isoform2=junction:chr1:156061444-156065910:+@exon:chr1:156065911-156066106:+@junction:chr1:156066107-156068269:+	RAB25	included
isoform1=junction:chr1:156115275-156134402:+|isoform2=junction:chr1:156115275-156130616:+@exon:chr1:156130617-156130773:+@junction:chr1:156130774-156134402:+	LMNA	included
isoform1=junction:chr1:156232426-156236287:+|isoform2=junction:chr1:156232426-156233627:+@exon:chr1:156233628-156233728:+@junction:chr1:156233729-156236287:+	PMF1	bimodal
isoform1=junction:chr1:156744349-156745007:-|isoform2=junction:chr1:156744571-156745007:-@exon:chr1:156744501-156744570:-@junction:chr1:156744349-156744500:-	HDGF	excluded
isoform1=junction:chr11:57737669-57738353:+|isoform2=junction:chr11:57737669-57737912:+@exon:chr11:57737913-57738026:+@junction:chr11:57738027-57738353:+	TMX2	bimodal
isoform1=junction:chr11:58838369-58844433:-|isoform2=junction:chr11:58839653-58844433:-@exon:chr11:58839535-58839652:-@junction:chr11:58838369-58839534:-	GLYATL2	bimodal
isoform1=junction:chr11:59793515-59797282:+|isoform2=junction:chr11:59793515-59795371:+@exon:chr11:59795372-59795482:+@junction:chr11:59795483-59797282:+	STX3	multimodal
isoform1=junction:chr1:160205523-160211542:+|isoform2=junction:chr1:160205523-160207132:+@exon:chr1:160207133-160207237:+@junction:chr1:160207238-160211542:+	PEA15	excluded
isoform1=junction:chr11:60903862-60906363:-|isoform2=junction:chr11:60905453-60906363:-@exon:chr11:60905365-60905452:-@junction:chr11:60903862-60905364:-	PRPF19	excluded
isoform1=junction:chr1:161038076-161038879:-|isoform2=junction:chr1:161038635-161038879:-@novel_exon:chr1:161038544-161038634:-@junction:chr1:161038076-161038543:-	TSTD1	excluded
isoform1=junction:chr1:161038076-161038879:-|isoform2=junction:chr1:161038635-161038879:-@novel_exon:chr1:161038551-161038634:-@junction:chr1:161038076-161038550:-	TSTD1	multimodal
isoform1=junction:chr1:161038076-161038879:-|isoform2=junction:chr1:161038674-161038879:-@exon:chr1:161038551-161038673:-@junction:chr1:161038076-161038550:-	TSTD1	included
isoform1=junction:chr1:161072886-161073719:-|isoform2=junction:chr1:161073300-161073719:-@exon:chr1:161073225-161073299:-@junction:chr1:161072886-161073224:-	NECTIN4	multimodal
isoform1=junction:chr1:161073796-161074610:-|isoform2=junction:chr1:161074374-161074610:-@exon:chr1:161074217-161074373:-@junction:chr1:161073796-161074216:-	NECTIN4	included
isoform1=junction:chr1:161157018-161157616:+|isoform2=junction:chr1:161157018-161157253:+@exon:chr1:161157254-161157317:+@junction:chr1:161157318-161157616:+	UFC1	included
isoform1=junction:chr1:161157694-161158411:+|isoform2=junction:chr1:161157694-161158120:+@exon:chr1:161158121-161158211:+@junction:chr1:161158212-161158411:+	UFC1	included
isoform1=junction:chr1:161340656-161362328:+|isoform2=junction:chr1:161340656-161356676:+@exon:chr1:161356677-161356840:+@junction:chr1:161356841-161362328:+	SDHC	included
isoform1=junction:chr1:162498269-162503753:+|isoform2=junction:chr1:162498269-162499954:+@exon:chr1:162499955-162501104:+@junction:chr1:162501105-162503753:+	UHMK1	included
isoform1=junction:chr11:62633515-62634820:-|isoform2=junction:chr11:62634376-62634820:-@exon:chr11:62634310-62634375:-@junction:chr11:62633515-62634309:-	GANAB	excluded
isoform1=junction:chr11:62789427-62789885:+|isoform2=junction:chr11:62789427-62789600:+@exon:chr11:62789601-62789679:+@junction:chr11:62789680-62789885:+	TMEM179B	included
isoform1=junction:chr11:62853834-62854518:-|isoform2=junction:chr11:62854065-62854518:-@exon:chr11:62854018-62854064:-@junction:chr11:62853834-62854017:-	SNHG1	included
isoform1=junction:chr11:63536878-63544620:+|isoform2=junction:chr11:63536878-63539515:+@exon:chr11:63539516-63539624:+@junction:chr11:63539625-63544620:+	RARRES3	included
isoform1=junction:chr11:64227133-64227567:+|isoform2=junction:chr11:64227133-64227400:+@exon:chr11:64227401-64227493:+@junction:chr11:64227494-64227567:+	NUDT22	excluded
isoform1=junction:chr11:64227133-64229246:+|isoform2=junction:chr11:64227133-64227567:+@exon:chr11:64227568-64227666:+@junction:chr11:64227667-64229246:+	NUDT22	included
isoform1=junction:chr11:64318387-64320660:+|isoform2=junction:chr11:64318387-64319733:+@exon:chr11:64319734-64319868:+@junction:chr11:64319869-64320660:+	PRDX5	included
isoform1=junction:chr11:64319869-64320864:+|isoform2=junction:chr11:64319869-64320660:+@exon:chr11:64320661-64320792:+@junction:chr11:64320793-64320864:+	PRDX5	included
isoform1=junction:chr11:6478960-6479971:-|isoform2=junction:chr11:6479259-6479971:-@exon:chr11:6479140-6479258:-@junction:chr11:6478960-6479139:-	ARFIP2	included
isoform1=junction:chr11:65131597-65132921:-|isoform2=junction:chr11:65132781-65132921:-@exon:chr11:65132248-65132780:-@junction:chr11:65131597-65132247:-	SYVN1	multimodal
isoform1=junction:chr1:165651088-165654278:+|isoform2=junction:chr1:165651088-165651977:+@exon:chr1:165651978-165652035:+@junction:chr1:165652036-165654278:+	MGST3	included
isoform1=junction:chr11:65855449-65855934:-|isoform2=junction:chr11:65855731-65855934:-@exon:chr11:65855654-65855730:-@junction:chr11:65855449-65855653:-	CFL1	included
isoform1=junction:chr11:65893297-65896808:-|isoform2=junction:chr11:65894122-65896808:-@exon:chr11:65894014-65894121:-@junction:chr11:65893297-65894013:-	FOSL1	included
isoform1=junction:chr11:66002571-66003625:+|isoform2=junction:chr11:66002571-66003234:+@exon:chr11:66003235-66003373:+@junction:chr11:66003374-66003625:+	BANF1	included
isoform1=junction:chr11:6604361-6608393:+|isoform2=junction:chr11:6604361-6608045:+@exon:chr11:6608046-6608211:+@junction:chr11:6608212-6608393:+	ILK	included
isoform1=junction:chr11:6608490-6608883:+|isoform2=junction:chr11:6608490-6608693:+@exon:chr11:6608694-6608790:+@junction:chr11:6608791-6608883:+	ILK	included
isoform1=junction:chr11:6608968-6609298:+|isoform2=junction:chr11:6608968-6609070:+@exon:chr11:6609071-6609156:+@junction:chr11:6609157-6609298:+	ILK	included
isoform1=junction:chr11:66337890-66338720:-|isoform2=junction:chr11:66338283-66338720:-@exon:chr11:66338243-66338282:-@junction:chr11:66337890-66338242:-	BRMS1	included
isoform1=junction:chr11:66640124-66646026:+|isoform2=junction:chr11:66640124-66643449:+@exon:chr11:66643450-66644140:+@junction:chr11:66644141-66646026:+	RBM14-RBM4	multimodal
isoform1=junction:chr11:67583845-67584463:+|isoform2=junction:chr11:67583845-67584133:+@exon:chr11:67584134-67584169:+@junction:chr11:67584170-67584463:+	GSTP1	included
isoform1=junction:chr1:167773369-167787819:+|isoform2=junction:chr1:167773369-167776063:+@exon:chr1:167776064-167776166:+@junction:chr1:167776167-167787819:+	MPZL1	included
isoform1=junction:chr1:168231920-168236588:+|isoform2=junction:chr1:168231920-168235100:+@exon:chr1:168235101-168235182:+@junction:chr1:168235183-168236588:+	SFT2D2	bimodal
isoform1=junction:chr11:70108405-70111706:+|isoform2=junction:chr11:70108405-70111125:+@exon:chr11:70111126-70111191:+@junction:chr11:70111192-70111706:+	ANO1	bimodal
isoform1=junction:chr11:70420511-70422939:+|isoform2=junction:chr11:70420511-70421469:+@exon:chr11:70421470-70421580:+@junction:chr11:70421581-70422939:+	CTTN	multimodal
isoform1=junction:chr11:72755754-72758529:-|isoform2=junction:chr11:72757885-72758529:-@exon:chr11:72757767-72757884:-@junction:chr11:72755754-72757766:-	STARD10	included
isoform1=junction:chr11:73677963-73707419:-|isoform2=junction:chr11:73679721-73707419:-@exon:chr11:73679654-73679720:-@junction:chr11:73677963-73679653:-	RAB6A	included
isoform1=junction:chr11:73718719-73720845:-@exon:chr11:73718613-73718718:-@junction:chr11:73716363-73718612:-|isoform2=junction:chr11:73718891-73720845:-@exon:chr11:73718785-73718890:-@junction:chr11:73716363-73718784:-	RAB6A	multimodal
isoform1=junction:chr1:173864305-173864674:-|isoform2=junction:chr1:173864507-173864674:-@exon:chr1:173864484-173864506:-@junction:chr1:173864305-173864483:-	GAS5	included
isoform1=junction:chr1:173864305-173865228:-|isoform2=junction:chr1:173864705-173865228:-@exon:chr1:173864484-173864704:-@junction:chr1:173864305-173864483:-	GAS5	included
isoform1=junction:chr1:173864305-173865228:-|isoform2=junction:chr1:173864705-173865228:-@exon:chr1:173864675-173864704:-@junction:chr1:173864305-173864674:-	GAS5	included
isoform1=junction:chr1:173864705-173865470:-|isoform2=junction:chr1:173865283-173865470:-@exon:chr1:173865229-173865282:-@junction:chr1:173864705-173865228:-	GAS5	included
isoform1=junction:chr1:173864705-173865509:-|isoform2=junction:chr1:173865283-173865509:-@exon:chr1:173865229-173865282:-@junction:chr1:173864705-173865228:-	GAS5	included
isoform1=junction:chr11:73873395-73876756:-|isoform2=junction:chr11:73876576-73876756:-@exon:chr11:73876479-73876575:-@junction:chr11:73873395-73876478:-	COA4	excluded
isoform1=junction:chr11:73975122-73976640:-|isoform2=junction:chr11:73975672-73976640:-@exon:chr11:73975491-73975671:-@junction:chr11:73975122-73975490:-	UCP2	included
isoform1=junction:chr11:73976743-73977885:-|isoform2=junction:chr11:73977018-73977885:-@exon:chr11:73976823-73977017:-@junction:chr11:73976743-73976822:-	UCP2	included
isoform1=junction:chr11:75401734-75404019:+|isoform2=junction:chr11:75401734-75402351:+@exon:chr11:75402352-75402446:+@junction:chr11:75402447-75404019:+	RPS3	included
isoform1=junction:chr1:182388751-182391678:-|isoform2=junction:chr1:182390853-182391678:-@exon:chr1:182390497-182390852:-@junction:chr1:182388751-182390496:-	GLUL	excluded
isoform1=junction:chr1:182854179-182856531:+|isoform2=junction:chr1:182854179-182855576:+@exon:chr1:182855577-182855713:+@junction:chr1:182855714-182856531:+	DHX9	bimodal
isoform1=junction:chr11:83261967-83273646:-|isoform2=junction:chr11:83265980-83273646:-@exon:chr11:83265865-83265979:-@junction:chr11:83261967-83265864:-	CCDC90B	multimodal
isoform1=junction:chr11:83274741-83280140:-|isoform2=junction:chr11:83278830-83280140:-@exon:chr11:83278726-83278829:-@junction:chr11:83274741-83278725:-	CCDC90B	multimodal
isoform1=junction:chr11:833027-836062:+|isoform2=junction:chr11:833027-834529:+@exon:chr11:834530-834591:+@junction:chr11:834592-836062:+	CD151	multimodal
isoform1=junction:chr11:88326444-88334936:-|isoform2=junction:chr11:88328197-88334936:-@exon:chr11:88328112-88328196:-@junction:chr11:88326444-88328111:-	CTSC	bimodal
isoform1=junction:chr1:19122013-19122832:-|isoform2=junction:chr1:19122658-19122832:-@novel_exon:chr1:19122588-19122657:-@junction:chr1:19122013-19122587:-	UBR4	excluded
isoform1=junction:chr1:202013299-202013828:+|isoform2=junction:chr1:202013299-202013578:+@novel_exon:chr1:202013579-202013625:+@junction:chr1:202013626-202013828:+	ELF3	excluded
isoform1=junction:chr1:202013299-202013828:+|isoform2=junction:chr1:202013299-202013578:+@novel_exon:chr1:202013579-202013640:+@junction:chr1:202013641-202013828:+	ELF3	excluded
isoform1=junction:chr1:202333556-202335645:-|isoform2=junction:chr1:202335059-202335645:-@exon:chr1:202334989-202335058:-@junction:chr1:202333556-202334988:-	UBE2T	included
isoform1=junction:chr1:203861744-203863662:+|isoform2=junction:chr1:203861744-203862181:+@exon:chr1:203862182-203862222:+@junction:chr1:203862223-203863662:+	SNRPE	included
isoform1=junction:chr1:203862223-203865040:+|isoform2=junction:chr1:203862223-203863662:+@exon:chr1:203863663-203863725:+@junction:chr1:203863726-203865040:+	SNRPE	included
isoform1=junction:chr1:204542945-204546796:+|isoform2=junction:chr1:204542945-204544534:+@exon:chr1:204544535-204544684:+@junction:chr1:204544685-204546796:+	MDM4	multimodal
isoform1=junction:chr1:207767196-207767778:+|isoform2=junction:chr1:207767196-207767606:+@exon:chr1:207767607-207767651:+@junction:chr1:207767652-207767778:+	CD46	excluded
isoform1=junction:chr1:207767196-207770320:+@exon:chr1:207770321-207770362:+@junction:chr1:207770363-207783291:+|isoform2=junction:chr1:207767196-207767778:+@exon:chr1:207767779-207767823:+@junction:chr1:207767824-207783291:+	CD46	multimodal
isoform1=junction:chr1:207767196-207770320:+|isoform2=junction:chr1:207767196-207767778:+@exon:chr1:207767779-207767823:+@junction:chr1:207767824-207770320:+	CD46	multimodal
isoform1=junction:chr1:207767196-207783291:+|isoform2=junction:chr1:207767196-207767778:+@exon:chr1:207767779-207767823:+@junction:chr1:207767824-207783291:+	CD46	multimodal
isoform1=junction:chr1:207767196-207783291:+|isoform2=junction:chr1:207767196-207770320:+@exon:chr1:207770321-207770362:+@junction:chr1:207770363-207783291:+	CD46	included
isoform1=junction:chr1:207767824-207783291:+|isoform2=junction:chr1:207767824-207770320:+@exon:chr1:207770321-207770362:+@junction:chr1:207770363-207783291:+	CD46	included
isoform1=junction:chr1:207785683-207793518:+|isoform2=junction:chr1:207785683-207790252:+@exon:chr1:207790253-207790345:+@junction:chr1:207790346-207793518:+	CD46	excluded
isoform1=junction:chr12:103931624-103932825:+|isoform2=junction:chr12:103931624-103932276:+@exon:chr12:103932277-103932418:+@junction:chr12:103932419-103932825:+	HSP90B1	included
isoform1=junction:chr12:104287110-104311289:+|isoform2=junction:chr12:104287110-104288930:+@exon:chr12:104288931-104289040:+@junction:chr12:104289041-104311289:+	TXNRD1	included
isoform1=junction:chr12:104319586-104325336:+|isoform2=junction:chr12:104319586-104321090:+@exon:chr12:104321091-104321316:+@junction:chr12:104321317-104325336:+	TXNRD1	included
isoform1=junction:chr12:105348627-105366616:+|isoform2=junction:chr12:105348627-105365806:+@exon:chr12:105365807-105365842:+@junction:chr12:105365843-105366616:+	C12orf75	included
isoform1=junction:chr12:10607937-10609830:-|isoform2=junction:chr12:10609384-10609830:-@exon:chr12:10609098-10609383:-@junction:chr12:10607937-10609097:-	MAGOHB	bimodal
isoform1=junction:chr12:10610681-10613438:-|isoform2=junction:chr12:10612979-10613438:-@exon:chr12:10612640-10612978:-@junction:chr12:10610681-10612639:-	MAGOHB	excluded
isoform1=junction:chr12:106956066-106967110:+|isoform2=junction:chr12:106956066-106957081:+@exon:chr12:106957082-106957149:+@junction:chr12:106957150-106967110:+	TMEM263	bimodal
isoform1=junction:chr12:108652418-108654305:-|isoform2=junction:chr12:108653061-108654305:-@exon:chr12:108653038-108653060:-@junction:chr12:108652418-108653037:-	CORO1C	excluded
isoform1=junction:chr12:110436205-110437083:-|isoform2=junction:chr12:110436684-110437083:-@exon:chr12:110436557-110436683:-@junction:chr12:110436205-110436556:-	ARPC3	included
isoform1=junction:chr12:110437153-110445451:-|isoform2=junction:chr12:110440389-110445451:-@exon:chr12:110440312-110440388:-@junction:chr12:110437153-110440311:-	ARPC3	included
isoform1=junction:chr12:110492123-110496011:-|isoform2=junction:chr12:110493232-110496011:-@exon:chr12:110492996-110493231:-@junction:chr12:110492123-110492995:-	VPS29	included
isoform1=junction:chr12:112013610-112022149:+|isoform2=junction:chr12:112013610-112019755:+@exon:chr12:112019756-112019894:+@junction:chr12:112019895-112022149:+	ERP29	included
isoform1=junction:chr12:120197463-120198853:-|isoform2=junction:chr12:120198740-120198853:-@exon:chr12:120198554-120198739:-@junction:chr12:120197463-120198553:-	RPLP0	included
isoform1=junction:chr12:120199486-120201082:-|isoform2=junction:chr12:120200832-120201082:-@exon:chr12:120200730-120200831:-@junction:chr12:120199486-120200729:-	RPLP0	included
isoform1=junction:chr12:120199486-120201082:-|isoform2=junction:chr12:120200892-120201082:-@exon:chr12:120200730-120200891:-@junction:chr12:120199486-120200729:-	RPLP0	included
isoform1=junction:chr12:120566981-120575630:+|isoform2=junction:chr12:120566981-120571190:+@exon:chr12:120571191-120571291:+@junction:chr12:120571292-120575630:+	RNF10	included
isoform1=junction:chr12:121309864-121318276:-|isoform2=junction:chr12:121310012-121318276:-@exon:chr12:121309970-121310011:-@junction:chr12:121309864-121309969:-	ANAPC5	excluded
isoform1=junction:chr12:122224645-122225964:-@exon:chr12:122224512-122224644:-@junction:chr12:122218398-122224511:-|isoform2=junction:chr12:122224749-122225964:-@exon:chr12:122224645-122224748:-@junction:chr12:122218398-122224644:-	DIABLO	multimodal
isoform1=junction:chr12:122341698-122352725:-|isoform2=junction:chr12:122347480-122352725:-@exon:chr12:122347375-122347479:-@junction:chr12:122341698-122347374:-	CLIP1	bimodal
isoform1=junction:chr12:122522300-122526847:-|isoform2=junction:chr12:122522907-122526847:-@exon:chr12:122522799-122522906:-@junction:chr12:122522300-122522798:-	RSRC2	multimodal
isoform1=junction:chr1:212433121-212444338:+|isoform2=junction:chr1:212433121-212442564:+@exon:chr1:212442565-212442625:+@junction:chr1:212442626-212444338:+	NENF	included
isoform1=junction:chr1:212618235-212619357:+|isoform2=junction:chr1:212618235-212619045:+@exon:chr1:212619046-212619266:+@junction:chr1:212619267-212619357:+	ATF3	excluded
isoform1=junction:chr1:213051510-213077695:+|isoform2=junction:chr1:213051510-213071005:+@exon:chr1:213071006-213071041:+@junction:chr1:213071042-213077695:+	RPS6KC1	included
isoform1=junction:chr12:14882281-14884212:-|isoform2=junction:chr12:14883048-14884212:-@exon:chr12:14882972-14883047:-@junction:chr12:14882281-14882971:-	MGP	bimodal
isoform1=junction:chr12:15882820-15889927:+|isoform2=junction:chr12:15882820-15883540:+@exon:chr12:15883541-15883676:+@junction:chr12:15883677-15889927:+	STRAP	included
isoform1=junction:chr12:16347711-16357604:+|isoform2=junction:chr12:16347711-16354230:+@exon:chr12:16354231-16354378:+@junction:chr12:16354379-16357604:+	MGST1	included
isoform1=junction:chr12:16354379-16363794:+|isoform2=junction:chr12:16354379-16357604:+@exon:chr12:16357605-16357699:+@junction:chr12:16357700-16363794:+	MGST1	included
isoform1=junction:chr12:16357700-16363794:+|isoform2=junction:chr12:16357700-16360299:+@exon:chr12:16360300-16360443:+@junction:chr12:16360444-16363794:+	MGST1	excluded
isoform1=junction:chr1:220069433-220073966:-|isoform2=junction:chr1:220072958-220073966:-@exon:chr1:220072850-220072957:-@junction:chr1:220069433-220072849:-	BPNT1	included
isoform1=junction:chr1:222719360-222724091:+|isoform2=junction:chr1:222719360-222722418:+@exon:chr1:222722419-222722514:+@junction:chr1:222722515-222724091:+	BROX	included
isoform1=junction:chr1:224183419-224192331:+|isoform2=junction:chr1:224183419-224189576:+@exon:chr1:224189577-224190319:+@junction:chr1:224190320-224192331:+	DEGS1	included
isoform1=junction:chr1:224308264-224317693:-|isoform2=junction:chr1:224311858-224317693:-@exon:chr1:224311800-224311857:-@junction:chr1:224308264-224311799:-	NVL	multimodal
isoform1=junction:chr1:224365992-224375794:+|isoform2=junction:chr1:224365992-224371282:+@exon:chr1:224371283-224371423:+@junction:chr1:224371424-224375794:+	CNIH4	included
isoform1=junction:chr12:27724187-27737538:+|isoform2=junction:chr12:27724187-27735446:+@exon:chr12:27735447-27735556:+@junction:chr12:27735557-27737538:+	MRPS35	included
isoform1=junction:chr1:228107870-228108234:-|isoform2=junction:chr1:228108138-228108234:-@exon:chr1:228107977-228108137:-@junction:chr1:228107870-228107976:-	MRPL55	excluded
isoform1=junction:chr1:228108319-228109148:-|isoform2=junction:chr1:228109022-228109148:-@exon:chr1:228108955-228109021:-@junction:chr1:228108319-228108954:-	MRPL55	multimodal
isoform1=junction:chr1:228140364-228145510:+|isoform2=junction:chr1:228140364-228141123:+@exon:chr1:228141124-228141288:+@junction:chr1:228141289-228145510:+	GUK1	multimodal
isoform1=junction:chr1:228141289-228145510:+|isoform2=junction:chr1:228141289-228141625:+@exon:chr1:228141626-228141829:+@junction:chr1:228141830-228145510:+	GUK1	excluded
isoform1=junction:chr1:228147700-228148664:+|isoform2=junction:chr1:228147700-228148370:+@exon:chr1:228148371-228148456:+@junction:chr1:228148457-228148664:+	GUK1	included
isoform1=junction:chr1:229299073-229303805:+|isoform2=junction:chr1:229299073-229302861:+@exon:chr1:229302862-229302989:+@junction:chr1:229302990-229303805:+	RAB4A	included
isoform1=junction:chr1:23321664-23333517:-|isoform2=junction:chr1:23323733-23333517:-@exon:chr1:23323556-23323732:-@junction:chr1:23321664-23323555:-	HNRNPR	included
isoform1=junction:chr1:23323733-23337753:-|isoform2=junction:chr1:23333632-23337753:-@exon:chr1:23333518-23333631:-@junction:chr1:23323733-23333517:-	HNRNPR	included
isoform1=junction:chr1:23338609-23344210:-|isoform2=junction:chr1:23341021-23344210:-@exon:chr1:23340852-23341020:-@junction:chr1:23338609-23340851:-	HNRNPR	excluded
isoform1=junction:chr1:235328779-235341707:+|isoform2=junction:chr1:235328779-235335241:+@exon:chr1:235335242-235335334:+@junction:chr1:235335335-235341707:+	GGPS1	bimodal
isoform1=junction:chr1:23798731-23799365:-|isoform2=junction:chr1:23799013-23799365:-@exon:chr1:23798887-23799012:-@junction:chr1:23798731-23798886:-	GALE	bimodal
isoform1=junction:chr1:2397221-2400856:+|isoform2=junction:chr1:2397221-2399414:+@exon:chr1:2399415-2399514:+@junction:chr1:2399515-2400856:+	RER1	included
isoform1=junction:chr12:42322447-42325923:-|isoform2=junction:chr12:42324105-42325923:-@exon:chr12:42324019-42324104:-@junction:chr12:42322447-42324018:-	ZCRB1	included
isoform1=junction:chr12:42375075-42387455:+|isoform2=junction:chr12:42375075-42384939:+@exon:chr12:42384940-42384996:+@junction:chr12:42384997-42387455:+	PPHLN1	bimodal
isoform1=junction:chr1:244835757-244842194:+|isoform2=junction:chr1:244835757-244841943:+@exon:chr1:244841944-244842058:+@junction:chr1:244842059-244842194:+	COX20	multimodal
isoform1=junction:chr12:46367341-46370775:-|isoform2=junction:chr12:46370628-46370775:-@exon:chr12:46370512-46370627:-@junction:chr12:46367341-46370511:-	SLC38A2	multimodal
isoform1=junction:chr1:24646790-24648858:+|isoform2=junction:chr1:24646790-24647078:+@exon:chr1:24647079-24647208:+@junction:chr1:24647209-24648858:+	SRRM1	multimodal
isoform1=junction:chr12:47965346-47966088:+|isoform2=junction:chr12:47965346-47965837:+@exon:chr12:47965838-47965997:+@junction:chr12:47965998-47966088:+	TMEM106C	included
isoform1=junction:chr12:48149999-48151200:-|isoform2=junction:chr12:48150141-48151200:-@exon:chr12:48150087-48150140:-@junction:chr12:48149999-48150086:-	ASB8	excluded
isoform1=junction:chr12:48151306-48153367:-|isoform2=junction:chr12:48151666-48153367:-@exon:chr12:48151610-48151665:-@junction:chr12:48151306-48151609:-	ASB8	excluded
isoform1=junction:chr12:48671963-48679654:-|isoform2=junction:chr12:48679151-48679654:-@exon:chr12:48679036-48679150:-@junction:chr12:48671963-48679035:-	KANSL2	multimodal
isoform1=junction:chr12:48939780-48940947:-|isoform2=junction:chr12:48940108-48940947:-@exon:chr12:48939997-48940107:-@junction:chr12:48939780-48939996:-	AC073610.3	included
isoform1=junction:chr12:53295640-53296243:+|isoform2=junction:chr12:53295640-53295838:+@exon:chr12:53295839-53295941:+@junction:chr12:53295942-53296243:+	PFDN5	included
isoform1=junction:chr12:53295640-53297849:+|isoform2=junction:chr12:53295640-53295838:+@exon:chr12:53295839-53296275:+@junction:chr12:53296276-53297849:+	PFDN5	included
isoform1=junction:chr12:53295942-53297849:+|isoform2=junction:chr12:53295942-53296243:+@exon:chr12:53296244-53296275:+@junction:chr12:53296276-53297849:+	PFDN5	included
isoform1=junction:chr12:53303194-53306197:+|isoform2=junction:chr12:53303194-53305907:+@exon:chr12:53305908-53306060:+@junction:chr12:53306061-53306197:+	C12orf10	included
isoform1=junction:chr12:53467294-53468776:+|isoform2=junction:chr12:53467294-53467804:+@exon:chr12:53467805-53467843:+@junction:chr12:53467844-53468776:+	PCBP2	included
isoform1=junction:chr1:25351694-25356792:+|isoform2=junction:chr1:25351694-25352881:+@exon:chr1:25352882-25352974:+@junction:chr1:25352975-25356792:+	TMEM50A	included
isoform1=junction:chr12:53669949-53676052:-|isoform2=junction:chr12:53672646-53676052:-@exon:chr12:53672576-53672645:-@junction:chr12:53669949-53672575:-	ATP5G2	included
isoform1=junction:chr12:54342288-54345459:+|isoform2=junction:chr12:54342288-54343224:+@exon:chr12:54343225-54343316:+@junction:chr12:54343317-54345459:+	COPZ1	included
isoform1=junction:chr12:54371097-54373972:-|isoform2=junction:chr12:54371716-54373972:-@exon:chr12:54371473-54371715:-@junction:chr12:54371097-54371472:-	ZNF385A	included
isoform1=junction:chr12:54854641-54856769:+|isoform2=junction:chr12:54854641-54855115:+@exon:chr12:54855116-54855157:+@junction:chr12:54855158-54856769:+	MUCL1	included
isoform1=junction:chr12:56116800-56117481:+|isoform2=junction:chr12:56116800-56117188:+@exon:chr12:56117189-56117211:+@junction:chr12:56117212-56117481:+	RPL41	included
isoform1=junction:chr12:56158712-56159586:+|isoform2=junction:chr12:56158712-56158901:+@novel_exon:chr12:56158902-56158920:+@junction:chr12:56158921-56159586:+	MYL6B	excluded
isoform1=junction:chr12:56158712-56159974:+|isoform2=junction:chr12:56158712-56159586:+@exon:chr12:56159587-56159730:+@junction:chr12:56159731-56159974:+	MYL6	included
isoform1=junction:chr12:56160321-56161386:+|isoform2=junction:chr12:56160321-56160625:+@exon:chr12:56160626-56160670:+@junction:chr12:56160671-56161386:+	MYL6	excluded
isoform1=junction:chr12:56314967-56315820:-|isoform2=junction:chr12:56315243-56315820:-@exon:chr12:56315130-56315242:-@junction:chr12:56314967-56315129:-	AC073896.1	included
isoform1=junction:chr12:56642581-56643402:-|isoform2=junction:chr12:56642832-56643402:-@exon:chr12:56642673-56642831:-@junction:chr12:56642581-56642672:-	ATP5B	included
isoform1=junction:chr12:56644956-56645836:-|isoform2=junction:chr12:56645354-56645836:-@exon:chr12:56645171-56645353:-@junction:chr12:56644956-56645170:-	ATP5B	included
isoform1=junction:chr12:56664801-56670274:-|isoform2=junction:chr12:56666267-56670274:-@exon:chr12:56666204-56666266:-@junction:chr12:56664801-56666203:-	PTGES3	included
isoform1=junction:chr12:56666267-56671748:-|isoform2=junction:chr12:56670365-56671748:-@exon:chr12:56670275-56670364:-@junction:chr12:56666267-56670274:-	PTGES3	included
isoform1=junction:chr12:57489559-57490206:+|isoform2=junction:chr12:57489559-57489895:+@exon:chr12:57489896-57489971:+@junction:chr12:57489972-57490206:+	MARS	included
isoform1=junction:chr12:57490380-57498156:+|isoform2=junction:chr12:57490380-57490537:+@exon:chr12:57490538-57490644:+@junction:chr12:57490645-57498156:+	MARS	included
isoform1=junction:chr12:57535846-57546027:-|isoform2=junction:chr12:57538525-57546027:-@exon:chr12:57538519-57538524:-@junction:chr12:57535846-57538518:-	DCTN2	bimodal
isoform1=junction:chr12:57599212-57600323:+|isoform2=junction:chr12:57599212-57599399:+@exon:chr12:57599400-57599438:+@junction:chr12:57599439-57600323:+	PIP4K2C	included
isoform1=junction:chr12:57719183-57720405:+|isoform2=junction:chr12:57719183-57720098:+@exon:chr12:57720099-57720263:+@junction:chr12:57720264-57720405:+	OS9	multimodal
isoform1=junction:chr12:57751343-57752174:-|isoform2=junction:chr12:57751737-57752174:-@exon:chr12:57751500-57751736:-@junction:chr12:57751343-57751499:-	CDK4	bimodal
isoform1=junction:chr12:57771258-57771973:-|isoform2=junction:chr12:57771606-57771973:-@exon:chr12:57771480-57771605:-@junction:chr12:57771258-57771479:-	METTL1	excluded
isoform1=junction:chr12:57787163-57796176:+|isoform2=junction:chr12:57787163-57792985:+@exon:chr12:57792986-57793073:+@junction:chr12:57793074-57796176:+	TSFM	bimodal
isoform1=junction:chr12:64721706-64728955:-|isoform2=junction:chr12:64723114-64728955:-@exon:chr12:64723006-64723113:-@junction:chr12:64721706-64723005:-	GNS	included
isoform1=junction:chr12:64747919-64759084:-|isoform2=junction:chr12:64752758-64759084:-@exon:chr12:64752698-64752757:-@junction:chr12:64747919-64752697:-	GNS	included
isoform1=junction:chr12:66138167-66145840:-|isoform2=junction:chr12:66138770-66145840:-@exon:chr12:66138724-66138769:-@junction:chr12:66138167-66138723:-	TMBIM4	included
isoform1=junction:chr12:6849199-6849564:-|isoform2=junction:chr12:6849430-6849564:-@exon:chr12:6849323-6849429:-@junction:chr12:6849199-6849322:-	CDCA3	multimodal
isoform1=junction:chr12:68611044-68650399:+|isoform2=junction:chr12:68611044-68648698:+@exon:chr12:68648699-68648781:+@junction:chr12:68648782-68650399:+	RAP1B	included
isoform1=junction:chr12:68813629-68820324:+|isoform2=junction:chr12:68813629-68816811:+@exon:chr12:68816812-68816945:+@junction:chr12:68816946-68820324:+	MDM2	included
isoform1=junction:chr12:70330470-70335437:+|isoform2=junction:chr12:70330470-70332766:+@exon:chr12:70332767-70332846:+@junction:chr12:70332847-70335437:+	CNOT2	included
isoform1=junction:chr12:70342169-70344127:+|isoform2=junction:chr12:70342169-70342257:+@exon:chr12:70342258-70342307:+@junction:chr12:70342308-70344127:+	CNOT2	included
isoform1=junction:chr12:71880608-71893221:+|isoform2=junction:chr12:71880608-71884810:+@exon:chr12:71884811-71885021:+@junction:chr12:71885022-71893221:+	TBC1D15	included
isoform1=junction:chr12:71893325-71894685:+|isoform2=junction:chr12:71893325-71894324:+@exon:chr12:71894325-71894375:+@junction:chr12:71894376-71894685:+	TBC1D15	bimodal
isoform1=junction:chr1:27330805-27332069:+|isoform2=junction:chr1:27330805-27330984:+@exon:chr1:27330985-27331137:+@junction:chr1:27331138-27332069:+	TMEM222	excluded
isoform1=junction:chr12:75506400-75506781:-|isoform2=junction:chr12:75506610-75506781:-@exon:chr12:75506484-75506609:-@junction:chr12:75506400-75506483:-	KRR1	included
isoform1=junction:chr12:76068995-76084566:-|isoform2=junction:chr12:76074240-76084566:-@exon:chr12:76074203-76074239:-@junction:chr12:76068995-76074202:-	NAP1L1	included
isoform1=junction:chr12:76450989-76487509:-|isoform2=junction:chr12:76459896-76487509:-@exon:chr12:76459859-76459895:-@junction:chr12:76450989-76459858:-	OSBPL8	multimodal
isoform1=junction:chr12:79613610-79621075:-|isoform2=junction:chr12:79614612-79621075:-@novel_exon:chr12:79614535-79614611:-@junction:chr12:79613610-79614534:-	PAWR	excluded
isoform1=junction:chr12:79798585-79806165:-|isoform2=junction:chr12:79805769-79806165:-@exon:chr12:79805592-79805768:-@junction:chr12:79798585-79805591:-	PPP1R12A	included
isoform1=junction:chr1:28438431-28459084:+|isoform2=junction:chr1:28438431-28457831:+@exon:chr1:28457832-28457855:+@junction:chr1:28457856-28459084:+	PHACTR4	bimodal
isoform1=junction:chr1:28738339-28768928:+|isoform2=junction:chr1:28738339-28742402:+@exon:chr1:28742403-28743986:+@junction:chr1:28743987-28768928:+	YTHDF2	included
isoform1=junction:chr12:89349562-89351639:-|isoform2=junction:chr12:89351026-89351639:-@exon:chr12:89350588-89351025:-@junction:chr12:89349562-89350587:-	DUSP6	included
isoform1=junction:chr1:29159487-29160374:-|isoform2=junction:chr1:29160059-29160374:-@exon:chr1:29159864-29160058:-@junction:chr1:29159487-29159863:-	SRSF4	bimodal
isoform1=junction:chr12:94971621-95002738:-|isoform2=junction:chr12:94994258-95002738:-@exon:chr12:94994170-94994257:-@junction:chr12:94971621-94994169:-	NDUFA12	included
isoform1=junction:chr12:96194706-96223564:+|isoform2=junction:chr12:96194706-96198025:+@exon:chr12:96198026-96198142:+@junction:chr12:96198143-96223564:+	ELK3	multimodal
isoform1=junction:chr1:30941273-30945345:-|isoform2=junction:chr1:30942124-30945345:-@exon:chr1:30941998-30942123:-@junction:chr1:30941273-30941997:-	PUM1	multimodal
isoform1=junction:chr13:113501881-113510237:+|isoform2=junction:chr13:113501881-113503495:+@exon:chr13:113503496-113503588:+@junction:chr13:113503589-113510237:+	TMCO3	included
isoform1=junction:chr1:31310165-31319108:+|isoform2=junction:chr1:31310165-31318166:+@exon:chr1:31318167-31318236:+@junction:chr1:31318237-31319108:+	ZCCHC17	excluded
isoform1=junction:chr1:31319167-31338956:+|isoform2=junction:chr1:31319167-31337174:+@exon:chr1:31337175-31337275:+@junction:chr1:31337276-31338956:+	ZCCHC17	included
isoform1=junction:chr1:31908961-31911695:-|isoform2=junction:chr1:31910113-31911695:-@exon:chr1:31910038-31910112:-@junction:chr1:31908961-31910037:-	PTP4A2	included
isoform1=junction:chr1:31910113-31915894:-|isoform2=junction:chr1:31911827-31915894:-@exon:chr1:31911696-31911826:-@junction:chr1:31910113-31911695:-	PTP4A2	included
isoform1=junction:chr1:31911827-31918969:-|isoform2=junction:chr1:31915988-31918969:-@exon:chr1:31915895-31915987:-@junction:chr1:31911827-31915894:-	PTP4A2	included
isoform1=junction:chr1:32030423-32033187:+|isoform2=junction:chr1:32030423-32031523:+@exon:chr1:32031524-32031640:+@junction:chr1:32031641-32033187:+	KHDRBS1	bimodal
isoform1=junction:chr1:32627545-32633644:-|isoform2=junction:chr1:32631880-32633644:-@exon:chr1:32631827-32631879:-@junction:chr1:32627545-32631826:-	ZBTB8OS	multimodal
isoform1=junction:chr13:27253844-27255241:+|isoform2=junction:chr13:27253844-27254219:+@exon:chr13:27254220-27254281:+@junction:chr13:27254282-27255241:+	RPL21	included
isoform1=junction:chr13:27430622-27434138:+|isoform2=junction:chr13:27430622-27432730:+@exon:chr13:27432731-27432804:+@junction:chr13:27432805-27434138:+	GTF3A	bimodal
isoform1=junction:chr13:27435035-27435432:+|isoform2=junction:chr13:27435035-27435132:+@exon:chr13:27435133-27435192:+@junction:chr13:27435193-27435432:+	GTF3A	included
isoform1=junction:chr1:32810767-32817187:-|isoform2=junction:chr1:32811058-32817187:-@exon:chr1:32810911-32811057:-@junction:chr1:32810767-32810910:-	YARS	included
isoform1=junction:chr13:36952600-36971976:-|isoform2=junction:chr13:36965727-36971976:-@exon:chr13:36965575-36965726:-@junction:chr13:36952600-36965574:-	ALG5	included
isoform1=junction:chr13:38354297-38359300:+|isoform2=junction:chr13:38354297-38358092:+@exon:chr13:38358093-38358132:+@junction:chr13:38358133-38359300:+	UFM1	included
isoform1=junction:chr13:43069004-43085767:+|isoform2=junction:chr13:43069004-43078611:+@exon:chr13:43078612-43078688:+@junction:chr13:43078689-43085767:+	DNAJC15	included
isoform1=junction:chr13:45338777-45339993:-|isoform2=junction:chr13:45339603-45339993:-@exon:chr13:45339497-45339602:-@junction:chr13:45338777-45339496:-	TPT1	included
isoform1=junction:chr13:45340185-45341041:-|isoform2=junction:chr13:45340786-45341041:-@exon:chr13:45340712-45340785:-@junction:chr13:45340185-45340711:-	TPT1	included
isoform1=junction:chr13:46777624-46781495:-|isoform2=junction:chr13:46780034-46781495:-@exon:chr13:46779935-46780033:-@junction:chr13:46777624-46779934:-	ESD	included
isoform1=junction:chr13:52657623-52658398:+|isoform2=junction:chr13:52657623-52658098:+@exon:chr13:52658099-52658226:+@junction:chr13:52658227-52658398:+	SUGT1	excluded
isoform1=junction:chr1:35631345-35641341:-|isoform2=junction:chr1:35636433-35641341:-@exon:chr1:35636310-35636432:-@junction:chr1:35631345-35636309:-	PSMB2	included
isoform1=junction:chr13:75549863-75560752:+|isoform2=junction:chr13:75549863-75549975:+@exon:chr13:75549976-75549987:+@junction:chr13:75549988-75560752:+	UCHL3	included
isoform1=junction:chr13:75569508-75594914:+|isoform2=junction:chr13:75569508-75589937:+@exon:chr13:75589938-75590129:+@junction:chr13:75590130-75594914:+	AL137782.1	excluded
isoform1=junction:chr13:75636727-75727028:+|isoform2=junction:chr13:75636727-75713181:+@exon:chr13:75713182-75713252:+@junction:chr13:75713253-75727028:+	LMO7	included
isoform1=junction:chr1:37576557-37582222:-|isoform2=junction:chr1:37581546-37582222:-@exon:chr1:37581342-37581545:-@junction:chr1:37576557-37581341:-	GNL2	bimodal
isoform1=junction:chr13:99555648-99562690:+|isoform2=junction:chr13:99555648-99559362:+@exon:chr13:99559363-99559534:+@junction:chr13:99559535-99562690:+	TM9SF2	included
isoform1=junction:chr1:40074184-40078559:-|isoform2=junction:chr1:40076914-40078559:-@exon:chr1:40076842-40076913:-@junction:chr1:40074184-40076841:-	PPT1	included
isoform1=junction:chr14:102348760-102355767:-|isoform2=junction:chr14:102350049-102355767:-@exon:chr14:102349919-102350048:-@junction:chr14:102348760-102349918:-	CINP	bimodal
isoform1=junction:chr14:103729183-103732619:+|isoform2=junction:chr14:103729183-103729792:+@exon:chr14:103729793-103729846:+@junction:chr14:103729847-103732619:+	ZFYVE21	excluded
isoform1=junction:chr14:103913985-103921469:-|isoform2=junction:chr14:103915190-103921469:-@exon:chr14:103915066-103915189:-@junction:chr14:103913985-103915065:-	C14orf2	included
isoform1=junction:chr14:104753320-104756603:+|isoform2=junction:chr14:104753320-104755629:+@exon:chr14:104755630-104755824:+@junction:chr14:104755825-104756603:+	SIVA1	included
isoform1=junction:chr14:21234230-21269297:-|isoform2=junction:chr14:21263337-21269297:-@exon:chr14:21263311-21263336:-@junction:chr14:21234230-21263310:-	HNRNPC	included
isoform1=junction:chr14:21234230-21269297:-|isoform2=junction:chr14:21263830-21269297:-@exon:chr14:21263311-21263829:-@junction:chr14:21234230-21263310:-	HNRNPC	multimodal
isoform1=junction:chr14:21263337-21269297:-|isoform2=junction:chr14:21263830-21269297:-@exon:chr14:21263667-21263829:-@junction:chr14:21263337-21263666:-	HNRNPC	excluded
isoform1=junction:chr14:22575234-22588946:-|isoform2=junction:chr14:22580893-22588946:-@novel_exon:chr14:22580829-22580892:-@junction:chr14:22575234-22580828:-	DAD1	excluded
isoform1=junction:chr14:22830255-22834171:+|isoform2=junction:chr14:22830255-22833417:+@exon:chr14:22833418-22833482:+@junction:chr14:22833483-22834171:+	MRPL52	included
isoform1=junction:chr14:23026376-23033367:-|isoform2=junction:chr14:23027830-23033367:-@exon:chr14:23027745-23027829:-@junction:chr14:23026376-23027744:-	PSMB5	excluded
isoform1=junction:chr14:24164956-24165846:+|isoform2=junction:chr14:24164956-24165056:+@exon:chr14:24165057-24165183:+@junction:chr14:24165184-24165846:+	AL136295.5	excluded
isoform1=junction:chr14:24218432-24232249:-|isoform2=junction:chr14:24231738-24232249:-@exon:chr14:24231652-24231737:-@junction:chr14:24218432-24231651:-	NEDD8-MDP1	excluded
isoform1=junction:chr1:43365009-43365563:-|isoform2=junction:chr1:43365377-43365563:-@exon:chr1:43365186-43365376:-@junction:chr1:43365009-43365185:-	ELOVL1	included
isoform1=junction:chr14:34603472-34605595:-|isoform2=junction:chr14:34604269-34605595:-@exon:chr14:34604135-34604268:-@junction:chr14:34603472-34604134:-	SNX6	excluded
isoform1=junction:chr14:34605718-34609637:-|isoform2=junction:chr14:34608141-34609637:-@exon:chr14:34608030-34608140:-@junction:chr14:34605718-34608029:-	SNX6	included
isoform1=junction:chr14:35292553-35308913:+|isoform2=junction:chr14:35292553-35307993:+@exon:chr14:35307994-35308088:+@junction:chr14:35308089-35308913:+	PSMA6	included
isoform1=junction:chr14:35402664-35403149:-|isoform2=junction:chr14:35402860-35403149:-@exon:chr14:35402771-35402859:-@junction:chr14:35402664-35402770:-	NFKBIA	included
isoform1=junction:chr1:43975108-43976089:+|isoform2=junction:chr1:43975108-43975799:+@exon:chr1:43975800-43975848:+@junction:chr1:43975849-43976089:+	ATP6V0B	included
isoform1=junction:chr1:43976380-43976772:+|isoform2=junction:chr1:43976380-43976589:+@exon:chr1:43976590-43976659:+@junction:chr1:43976660-43976772:+	ATP6V0B	included
isoform1=junction:chr14:52711169-52713880:+|isoform2=junction:chr14:52711169-52711409:+@exon:chr14:52711410-52711524:+@junction:chr14:52711525-52713880:+	PSMC6	multimodal
isoform1=junction:chr14:52718143-52718976:+|isoform2=junction:chr14:52718143-52718228:+@exon:chr14:52718229-52718352:+@junction:chr14:52718353-52718976:+	PSMC6	included
isoform1=junction:chr14:52721191-52723964:+|isoform2=junction:chr14:52721191-52723804:+@novel_exon:chr14:52723805-52723874:+@junction:chr14:52723875-52723964:+	PSMC6	excluded
isoform1=junction:chr14:54397078-54401523:+|isoform2=junction:chr14:54397078-54399893:+@exon:chr14:54399894-54399976:+@junction:chr14:54399977-54401523:+	CDKN3	included
isoform1=junction:chr14:54430405-54436368:-|isoform2=junction:chr14:54432221-54436368:-@exon:chr14:54432108-54432220:-@junction:chr14:54430405-54432107:-	CNIH1	included
isoform1=junction:chr14:55051804-55062617:+|isoform2=junction:chr14:55051804-55061679:+@exon:chr14:55061680-55061701:+@junction:chr14:55061702-55062617:+	MAPK1IP1L	included
isoform1=junction:chr1:45511415-45514872:-|isoform2=junction:chr1:45514638-45514872:-@exon:chr1:45514507-45514637:-@junction:chr1:45511415-45514506:-	PRDX1	included
isoform1=junction:chr1:45551156-45566568:+|isoform2=junction:chr1:45551156-45561788:+@exon:chr1:45561789-45561878:+@junction:chr1:45561879-45566568:+	AKR1A1	included
isoform1=junction:chr1:45568178-45568926:+|isoform2=junction:chr1:45568178-45568484:+@exon:chr1:45568485-45568684:+@junction:chr1:45568685-45568926:+	AKR1A1	included
isoform1=junction:chr1:45606592-45613168:+|isoform2=junction:chr1:45606592-45607320:+@exon:chr1:45607321-45608337:+@junction:chr1:45608338-45613168:+	NASP	excluded
isoform1=junction:chr14:58215285-58223621:+|isoform2=junction:chr14:58215285-58219693:+@exon:chr14:58219694-58219729:+@junction:chr14:58219730-58223621:+	ACTR10	included
isoform1=junction:chr14:58247833-58257744:+|isoform2=junction:chr14:58247833-58252118:+@exon:chr14:58252119-58252242:+@junction:chr14:58252243-58257744:+	PSMA3	included
isoform1=junction:chr14:59498909-59503853:+|isoform2=junction:chr14:59498909-59501190:+@exon:chr14:59501191-59501267:+@junction:chr14:59501268-59503853:+	JKAMP	included
isoform1=junction:chr1:46309128-46310154:+|isoform2=junction:chr1:46309128-46309896:+@exon:chr1:46309897-46310044:+@junction:chr1:46310045-46310154:+	UQCRH	bimodal
isoform1=junction:chr14:64924127-64932137:+|isoform2=junction:chr14:64924127-64926006:+@exon:chr14:64926007-64926080:+@junction:chr14:64926081-64932137:+	CHURC1	bimodal
isoform1=junction:chr14:64924127-64932137:+|isoform2=junction:chr14:64924127-64926009:+@exon:chr14:64926010-64926080:+@junction:chr14:64926081-64932137:+	CHURC1	bimodal
isoform1=junction:chr14:67651482-67656415:-|isoform2=junction:chr14:67653499-67656415:-@exon:chr14:67653437-67653498:-@junction:chr14:67651482-67653436:-	VTI1B	bimodal
isoform1=junction:chr14:67685205-67691139:-|isoform2=junction:chr14:67690422-67691139:-@exon:chr14:67690212-67690421:-@junction:chr14:67685205-67690211:-	RDH11	bimodal
isoform1=junction:chr14:67692594-67695629:-|isoform2=junction:chr14:67693053-67695629:-@exon:chr14:67692934-67693052:-@junction:chr14:67692594-67692933:-	RDH11	included
isoform1=junction:chr14:68878524-68879961:-@exon:chr14:68878458-68878523:-@junction:chr14:68877241-68878457:-|isoform2=junction:chr14:68879070-68879961:-@exon:chr14:68878989-68879069:-@junction:chr14:68877241-68878988:-	ACTN1	included
isoform1=junction:chr14:69768675-69769181:+|isoform2=junction:chr14:69768675-69768797:+@exon:chr14:69768798-69768896:+@junction:chr14:69768897-69769181:+	SRSF5	included
isoform1=junction:chr14:70329237-70359518:-|isoform2=junction:chr14:70342730-70359518:-@exon:chr14:70342658-70342729:-@junction:chr14:70329237-70342657:-	COX16	included
isoform1=junction:chr14:70585784-70592879:-|isoform2=junction:chr14:70591382-70592879:-@exon:chr14:70591266-70591381:-@junction:chr14:70585784-70591265:-	MED6	included
isoform1=junction:chr1:47185098-47189865:-|isoform2=junction:chr1:47187428-47189865:-@exon:chr1:47187319-47187427:-@junction:chr1:47185098-47187318:-	PDZK1IP1	included
isoform1=junction:chr14:73959225-73961172:+|isoform2=junction:chr14:73959225-73959414:+@exon:chr14:73959415-73959522:+@junction:chr14:73959523-73961172:+	COQ6	included
isoform1=junction:chr14:74480780-74486328:-|isoform2=junction:chr14:74484588-74486328:-@exon:chr14:74484415-74484587:-@junction:chr14:74480780-74484414:-	NPC2	included
isoform1=junction:chr14:77708209-77710837:+|isoform2=junction:chr14:77708209-77710554:+@exon:chr14:77710555-77710665:+@junction:chr14:77710666-77710837:+	SLIRP	excluded
isoform1=junction:chr14:90397234-90400064:+|isoform2=junction:chr14:90397234-90398451:+@novel_exon:chr14:90398452-90398488:+@junction:chr14:90398489-90400064:+	CALM1	excluded
isoform1=junction:chr14:92131134-92134249:+|isoform2=junction:chr14:92131134-92134010:+@exon:chr14:92134011-92134170:+@junction:chr14:92134171-92134249:+	CPSF2	included
isoform1=junction:chr14:93218736-93220248:+|isoform2=junction:chr14:93218736-93219211:+@exon:chr14:93219212-93219361:+@junction:chr14:93219362-93220248:+	UBR7	bimodal
isoform1=junction:chr14:94110798-94111624:+|isoform2=junction:chr14:94110798-94110925:+@exon:chr14:94110926-94110978:+@junction:chr14:94110979-94111624:+	IFI27	excluded
isoform1=junction:chr14:94110798-94111658:+|isoform2=junction:chr14:94110798-94110925:+@exon:chr14:94110926-94110978:+@junction:chr14:94110979-94111658:+	IFI27	excluded
isoform1=junction:chr14:94110798-94114850:+|isoform2=junction:chr14:94110798-94111624:+@exon:chr14:94111625-94111773:+@junction:chr14:94111774-94114850:+	IFI27	included
isoform1=junction:chr14:94110798-94114850:+|isoform2=junction:chr14:94110798-94111658:+@exon:chr14:94111659-94111773:+@junction:chr14:94111774-94114850:+	IFI27	included
isoform1=junction:chr14:94111774-94115780:+|isoform2=junction:chr14:94111774-94114850:+@exon:chr14:94114851-94114880:+@junction:chr14:94114881-94115780:+	IFI27	included
isoform1=junction:chr15:101285802-101286907:-|isoform2=junction:chr15:101286294-101286907:-@exon:chr15:101286214-101286293:-@junction:chr15:101285802-101286213:-	SNRPA1	bimodal
isoform1=junction:chr1:51652042-51714002:+|isoform2=junction:chr1:51652042-51669433:+@exon:chr1:51669434-51669512:+@junction:chr1:51669513-51714002:+	OSBPL9	multimodal
isoform1=junction:chr1:51750196-51760689:+|isoform2=junction:chr1:51750196-51756319:+@exon:chr1:51756320-51756358:+@junction:chr1:51756359-51760689:+	OSBPL9	multimodal
isoform1=junction:chr1:51756359-51760689:+|isoform2=junction:chr1:51756359-51756780:+@novel_exon:chr1:51756781-51756815:+@junction:chr1:51756816-51760689:+	OSBPL9	excluded
isoform1=junction:chr1:53228955-53235576:-|isoform2=junction:chr1:53233653-53235576:-@exon:chr1:53233542-53233652:-@junction:chr1:53228955-53233541:-	MAGOH	multimodal
isoform1=junction:chr15:34163691-34209950:-|isoform2=junction:chr15:34178000-34209950:-@exon:chr15:34177821-34177999:-@junction:chr15:34163691-34177820:-	KATNBL1	multimodal
isoform1=junction:chr15:34225201-34227692:+|isoform2=junction:chr15:34225201-34225535:+@exon:chr15:34225536-34225650:+@junction:chr15:34225651-34227692:+	EMC4	included
isoform1=junction:chr15:34227847-34229752:+|isoform2=junction:chr15:34227847-34228428:+@exon:chr15:34228429-34228589:+@junction:chr15:34228590-34229752:+	EMC4	included
isoform1=junction:chr15:39588219-39588958:+|isoform2=junction:chr15:39588219-39588525:+@exon:chr15:39588526-39588699:+@junction:chr15:39588700-39588958:+	THBS1	included
isoform1=junction:chr1:54043526-54047266:-|isoform2=junction:chr1:54045787-54047266:-@exon:chr1:54045692-54045786:-@junction:chr1:54043526-54045691:-	TMEM59	included
isoform1=junction:chr15:40853930-40854396:+|isoform2=junction:chr15:40853930-40854059:+@exon:chr15:40854060-40854086:+@junction:chr15:40854087-40854396:+	SPINT1	included
isoform1=junction:chr15:41231450-41256909:+|isoform2=junction:chr15:41231450-41243666:+@exon:chr15:41243667-41243739:+@junction:chr15:41243740-41256909:+	CHP1	included
isoform1=junction:chr15:41256991-41270556:+|isoform2=junction:chr15:41256991-41262755:+@exon:chr15:41262756-41262883:+@junction:chr15:41262884-41270556:+	CHP1	included
isoform1=junction:chr15:41262884-41270556:+|isoform2=junction:chr15:41262884-41264164:+@exon:chr15:41264165-41264235:+@junction:chr15:41264236-41270556:+	CHP1	excluded
isoform1=junction:chr15:42231261-42233212:-@exon:chr15:42231192-42231260:-@junction:chr15:42228821-42231191:-|isoform2=junction:chr15:42231916-42233212:-@exon:chr15:42231844-42231915:-@junction:chr15:42228821-42231843:-	TMEM87A	multimodal
isoform1=junction:chr15:42268033-42273254:-|isoform2=junction:chr15:42272124-42273254:-@exon:chr15:42272063-42272123:-@junction:chr15:42268033-42272062:-	TMEM87A	bimodal
isoform1=junction:chr15:43189281-43190324:+|isoform2=junction:chr15:43189281-43190054:+@exon:chr15:43190055-43190151:+@junction:chr15:43190152-43190324:+	CCNDBP1	included
isoform1=junction:chr15:43746707-43756648:+|isoform2=junction:chr15:43746707-43753823:+@exon:chr15:43753824-43753902:+@junction:chr15:43753903-43756648:+	PDIA3	included
isoform1=junction:chr15:43761532-43765449:+|isoform2=junction:chr15:43761532-43763076:+@exon:chr15:43763077-43763206:+@junction:chr15:43763207-43765449:+	PDIA3	included
isoform1=junction:chr15:50301369-50303965:-|isoform2=junction:chr15:50303124-50303965:-@exon:chr15:50302929-50303123:-@junction:chr15:50301369-50302928:-	GABPB1	included
isoform1=junction:chr15:50707875-50722123:-|isoform2=junction:chr15:50720101-50722123:-@exon:chr15:50719940-50720100:-@junction:chr15:50707875-50719939:-	SPPL2A	included
isoform1=junction:chr15:57063824-57091788:+|isoform2=junction:chr15:57063824-57072652:+@exon:chr15:57072653-57072714:+@junction:chr15:57072715-57091788:+	TCF12	multimodal
isoform1=junction:chr15:57251424-57253261:+|isoform2=junction:chr15:57251424-57252420:+@exon:chr15:57252421-57252492:+@junction:chr15:57252493-57253261:+	TCF12	multimodal
isoform1=junction:chr15:59669363-59672636:-|isoform2=junction:chr15:59671315-59672636:-@exon:chr15:59671183-59671314:-@junction:chr15:59669363-59671182:-	BNIP2	included
isoform1=junction:chr15:59678088-59679591:-|isoform2=junction:chr15:59678835-59679591:-@exon:chr15:59678748-59678834:-@junction:chr15:59678088-59678747:-	BNIP2	excluded
isoform1=junction:chr15:60347690-60351192:-|isoform2=junction:chr15:60349198-60351192:-@exon:chr15:60349075-60349197:-@junction:chr15:60347690-60349074:-	ANXA2	included
isoform1=junction:chr15:60364524-60386027:-|isoform2=junction:chr15:60382442-60386027:-@exon:chr15:60382342-60382441:-@junction:chr15:60364524-60382341:-	ANXA2	included
isoform1=junction:chr15:60386087-60397257:-|isoform2=junction:chr15:60396428-60397257:-@exon:chr15:60396373-60396427:-@junction:chr15:60386087-60396372:-	ANXA2	excluded
isoform1=junction:chr15:60386087-60397942:-|isoform2=junction:chr15:60396428-60397942:-@exon:chr15:60396373-60396427:-@junction:chr15:60386087-60396372:-	ANXA2	excluded
isoform1=junction:chr15:60386087-60397942:-|isoform2=junction:chr15:60397339-60397942:-@exon:chr15:60397258-60397338:-@junction:chr15:60386087-60397257:-	ANXA2	excluded
isoform1=junction:chr15:63042944-63044026:+@exon:chr15:63044027-63044152:+@junction:chr15:63044153-63056984:+|isoform2=junction:chr15:63042944-63043705:+@exon:chr15:63043706-63043831:+@junction:chr15:63043832-63056984:+	TPM1	excluded
isoform1=junction:chr15:63061274-63062214:+|isoform2=junction:chr15:63061274-63061712:+@exon:chr15:63061713-63061788:+@junction:chr15:63061789-63062214:+	TPM1	excluded
isoform1=junction:chr15:63504831-63532646:+|isoform2=junction:chr15:63504831-63529013:+@exon:chr15:63529014-63529166:+@junction:chr15:63529167-63532646:+	USP3	excluded
isoform1=junction:chr15:64075538-64088686:-|isoform2=junction:chr15:64081152-64088686:-@exon:chr15:64081102-64081151:-@junction:chr15:64075538-64081101:-	FAM96A	multimodal
isoform1=junction:chr15:64366076-64380957:-|isoform2=junction:chr15:64376906-64380957:-@exon:chr15:64376743-64376905:-@junction:chr15:64366076-64376742:-	AC087632.1	included
isoform1=junction:chr15:65554961-65558679:+|isoform2=junction:chr15:65554961-65556738:+@exon:chr15:65556739-65556903:+@junction:chr15:65556904-65558679:+	HACD3	included
isoform1=junction:chr15:69421753-69422325:+|isoform2=junction:chr15:69421753-69421991:+@exon:chr15:69421992-69422128:+@junction:chr15:69422129-69422325:+	KIF23	multimodal
isoform1=junction:chr15:69453021-69455169:+|isoform2=junction:chr15:69453021-69453646:+@exon:chr15:69453647-69453721:+@junction:chr15:69453722-69455169:+	RPLP1	included
isoform1=junction:chr15:72202621-72206727:-@exon:chr15:72202454-72202620:-@junction:chr15:72200656-72202453:-|isoform2=junction:chr15:72203189-72206727:-@exon:chr15:72203022-72203188:-@junction:chr15:72200656-72203021:-	PKM	excluded
isoform1=junction:chr15:72353179-72355558:-|isoform2=junction:chr15:72353738-72355558:-@exon:chr15:72353691-72353737:-@junction:chr15:72353179-72353690:-	HEXA	included
isoform1=junction:chr15:74920443-74926765:-|isoform2=junction:chr15:74923771-74926765:-@exon:chr15:74923648-74923770:-@junction:chr15:74920443-74923647:-	COX5A	included
isoform1=junction:chr15:74923771-74929115:-|isoform2=junction:chr15:74926888-74929115:-@exon:chr15:74926766-74926887:-@junction:chr15:74923771-74926765:-	COX5A	included
isoform1=junction:chr15:74926888-74937914:-|isoform2=junction:chr15:74929233-74937914:-@exon:chr15:74929116-74929232:-@junction:chr15:74926888-74929115:-	COX5A	included
isoform1=junction:chr15:75338134-75338645:+|isoform2=junction:chr15:75338134-75338354:+@exon:chr15:75338355-75338420:+@junction:chr15:75338421-75338645:+	COMMD4	included
isoform1=junction:chr15:75339345-75339964:+|isoform2=junction:chr15:75339345-75339701:+@exon:chr15:75339702-75339878:+@junction:chr15:75339879-75339964:+	COMMD4	included
isoform1=junction:chr15:76292514-76295590:-|isoform2=junction:chr15:76292701-76295590:-@exon:chr15:76292619-76292700:-@junction:chr15:76292514-76292618:-	ETFA	included
isoform1=junction:chr15:76292514-76311349:-|isoform2=junction:chr15:76292701-76311349:-@exon:chr15:76292619-76292700:-@junction:chr15:76292514-76292618:-	ETFA	included
isoform1=junction:chr15:76292701-76311349:-|isoform2=junction:chr15:76295738-76311349:-@exon:chr15:76295591-76295737:-@junction:chr15:76292701-76295590:-	ETFA	included
isoform1=junction:chr15:78289713-78292615:-|isoform2=junction:chr15:78290100-78292615:-@exon:chr15:78289951-78290099:-@junction:chr15:78289713-78289950:-	WDR61	included
isoform1=junction:chr15:78542220-78544189:+|isoform2=junction:chr15:78542220-78542482:+@exon:chr15:78542483-78542645:+@junction:chr15:78542646-78544189:+	PSMA4	included
isoform1=junction:chr15:78545765-78548789:+|isoform2=junction:chr15:78545765-78546574:+@exon:chr15:78546575-78546698:+@junction:chr15:78546699-78548789:+	PSMA4	included
isoform1=junction:chr15:84670783-84687624:-|isoform2=junction:chr15:84680833-84687624:-@exon:chr15:84680713-84680832:-@junction:chr15:84670783-84680712:-	SEC11A	included
isoform1=junction:chr15:88475240-88477871:+|isoform2=junction:chr15:88475240-88476988:+@exon:chr15:88476989-88477054:+@junction:chr15:88477055-88477871:+	MRPS11	included
isoform1=junction:chr15:88639595-88655414:+|isoform2=junction:chr15:88639595-88652109:+@exon:chr15:88652110-88652310:+@junction:chr15:88652311-88655414:+	ISG20	included
isoform1=junction:chr15:90981034-90981747:-|isoform2=junction:chr15:90981670-90981747:-@exon:chr15:90981499-90981669:-@junction:chr15:90981034-90981498:-	PRC1	included
isoform1=junction:chr15:90984141-90994406:-|isoform2=junction:chr15:90984826-90994406:-@exon:chr15:90984693-90984825:-@junction:chr15:90984141-90984692:-	PRC1	included
isoform1=junction:chr16:14998406-15004186:+|isoform2=junction:chr16:14998406-15001775:+@exon:chr16:15001776-15001856:+@junction:chr16:15001857-15004186:+	PDXDC1	included
isoform1=junction:chr16:1786656-1787676:+|isoform2=junction:chr16:1786656-1786756:+@exon:chr16:1786757-1786955:+@junction:chr16:1786956-1787676:+	NUBP2	included
isoform1=junction:chr16:1962657-1963148:-|isoform2=junction:chr16:1962910-1963148:-@exon:chr16:1962736-1962909:-@junction:chr16:1962657-1962735:-	RPS2	included
isoform1=junction:chr16:21161279-21170436:+|isoform2=junction:chr16:21161279-21166839:+@exon:chr16:21166840-21166911:+@junction:chr16:21166912-21170436:+	TMEM159	excluded
isoform1=junction:chr16:21170606-21179474:+|isoform2=junction:chr16:21170606-21174009:+@exon:chr16:21174010-21174148:+@junction:chr16:21174149-21179474:+	TMEM159	included
isoform1=junction:chr16:2207346-2208449:+|isoform2=junction:chr16:2207346-2208209:+@exon:chr16:2208210-2208334:+@junction:chr16:2208335-2208449:+	MLST8	included
isoform1=junction:chr1:6232120-6234885:-|isoform2=junction:chr1:6233644-6234885:-@exon:chr1:6233474-6233643:-@junction:chr1:6232120-6233473:-	ICMT	bimodal
isoform1=junction:chr1:62442300-62444737:+|isoform2=junction:chr1:62442300-62443158:+@exon:chr1:62443159-62443319:+@junction:chr1:62443320-62444737:+	USP1	multimodal
isoform1=junction:chr16:2772103-2776992:-|isoform2=junction:chr16:2775557-2776992:-@exon:chr16:2775451-2775556:-@junction:chr16:2772103-2775450:-	ELOB	included
isoform1=junction:chr16:30064506-30067233:+|isoform2=junction:chr16:30064506-30066884:+@exon:chr16:30066885-30067038:+@junction:chr16:30067039-30067233:+	ALDOA	excluded
isoform1=junction:chr16:30065928-30067233:+|isoform2=junction:chr16:30065928-30066884:+@exon:chr16:30066885-30067038:+@junction:chr16:30067039-30067233:+	ALDOA	excluded
isoform1=junction:chr16:30082535-30083393:+|isoform2=junction:chr16:30082535-30082745:+@exon:chr16:30082746-30082847:+@junction:chr16:30082848-30083393:+	PPP4C	included
isoform1=junction:chr16:3020492-3021554:+|isoform2=junction:chr16:3020492-3021214:+@exon:chr16:3021215-3021319:+@junction:chr16:3021320-3021554:+	TNFRSF12A	included
isoform1=junction:chr16:31091343-31094556:-|isoform2=junction:chr16:31093422-31094556:-@exon:chr16:31093312-31093421:-@junction:chr16:31091343-31093311:-	AC135050.2	included
isoform1=junction:chr16:31185180-31188324:+|isoform2=junction:chr16:31185180-31186801:+@exon:chr16:31186802-31186836:+@junction:chr16:31186837-31188324:+	FUS	included
isoform1=junction:chr16:31201842-31202416:-|isoform2=junction:chr16:31202204-31202416:-@exon:chr16:31202147-31202203:-@junction:chr16:31201842-31202146:-	PYCARD	multimodal
isoform1=junction:chr16:48167661-48170888:-|isoform2=junction:chr16:48170219-48170888:-@exon:chr16:48170105-48170218:-@junction:chr16:48167661-48170104:-	ABCC11	multimodal
isoform1=junction:chr1:65425379-65431802:+|isoform2=junction:chr1:65425379-65429861:+@exon:chr1:65429862-65430048:+@junction:chr1:65430049-65431802:+	LEPROT	bimodal
isoform1=junction:chr16:56625880-56626879:+|isoform2=junction:chr16:56625880-56626465:+@exon:chr16:56626466-56626531:+@junction:chr16:56626532-56626879:+	MT1E	included
isoform1=junction:chr16:56935313-56936686:+|isoform2=junction:chr16:56935313-56935400:+@exon:chr16:56935401-56935475:+@junction:chr16:56935476-56936686:+	HERPUD1	included
isoform1=junction:chr16:634798-635280:-|isoform2=junction:chr16:634957-635280:-@exon:chr16:634889-634956:-@junction:chr16:634798-634888:-	METTL26	included
isoform1=junction:chr16:635341-636093:-|isoform2=junction:chr16:635775-636093:-@exon:chr16:635612-635774:-@junction:chr16:635341-635611:-	METTL26	included
isoform1=junction:chr16:66552794-66563121:+|isoform2=junction:chr16:66552794-66558189:+@exon:chr16:66558190-66558348:+@junction:chr16:66558349-66563121:+	CKLF	multimodal
isoform1=junction:chr16:66558349-66565885:+|isoform2=junction:chr16:66558349-66563121:+@exon:chr16:66563122-66563217:+@junction:chr16:66563218-66565885:+	CKLF	multimodal
isoform1=junction:chr16:67444707-67453543:-|isoform2=junction:chr16:67452361-67453543:-@exon:chr16:67452238-67452360:-@junction:chr16:67444707-67452237:-	ATP6V0D1	excluded
isoform1=junction:chr16:68815760-68822000:+|isoform2=junction:chr16:68815760-68819279:+@exon:chr16:68819280-68819425:+@junction:chr16:68819426-68822000:+	CDH1	included
isoform1=junction:chr16:69340333-69341532:+|isoform2=junction:chr16:69340333-69341179:+@exon:chr16:69341180-69341320:+@junction:chr16:69341321-69341532:+	NIP7	included
isoform1=junction:chr16:69711282-69714963:-|isoform2=junction:chr16:69713130-69714963:-@exon:chr16:69713028-69713129:-@junction:chr16:69711282-69713027:-	NQO1	included
isoform1=junction:chr16:69713130-69718122:-|isoform2=junction:chr16:69715078-69718122:-@exon:chr16:69714964-69715077:-@junction:chr16:69713130-69714963:-	NQO1	included
isoform1=junction:chr16:70255837-70258979:-|isoform2=junction:chr16:70258218-70258979:-@exon:chr16:70258033-70258217:-@junction:chr16:70255837-70258032:-	AARS	multimodal
isoform1=junction:chr16:75566908-75577278:+|isoform2=junction:chr16:75566908-75568036:+@exon:chr16:75568037-75568209:+@junction:chr16:75568210-75577278:+	GABARAPL2	included
isoform1=junction:chr16:87398871-87402174:+|isoform2=junction:chr16:87398871-87399597:+@exon:chr16:87399598-87399686:+@junction:chr16:87399687-87402174:+	MAP1LC3B	multimodal
isoform1=junction:chr16:89646715-89647202:-|isoform2=junction:chr16:89647072-89647202:-@novel_exon:chr16:89647035-89647071:-@junction:chr16:89646715-89647034:-	CHMP1A	excluded
isoform1=junction:chr16:89873860-89883350:+|isoform2=junction:chr16:89873860-89878460:+@exon:chr16:89878461-89878627:+@junction:chr16:89878628-89883350:+	TCF25	excluded
isoform1=junction:chr1:70228556-70232267:+|isoform2=junction:chr1:70228556-70231858:+@exon:chr1:70231859-70231975:+@junction:chr1:70231976-70232267:+	SRSF11	excluded
isoform1=junction:chr17:16439415-16440184:+@exon:chr17:16440185-16440253:+@junction:chr17:16440254-16441073:+|isoform2=junction:chr17:16439415-16439527:+@exon:chr17:16439528-16439703:+@junction:chr17:16439704-16441073:+	LRRC75A-AS1	excluded
isoform1=junction:chr17:16439415-16440184:+@exon:chr17:16440185-16440253:+@junction:chr17:16440254-16441073:+|isoform2=junction:chr17:16439415-16439580:+@exon:chr17:16439581-16439703:+@junction:chr17:16439704-16441073:+	LRRC75A-AS1	excluded
isoform1=junction:chr17:16439415-16440184:+@exon:chr17:16440185-16440253:+@junction:chr17:16440254-16441073:+|isoform2=junction:chr17:16439415-16439659:+@exon:chr17:16439660-16439703:+@junction:chr17:16439704-16441073:+	LRRC75A-AS1	excluded
isoform1=junction:chr17:16439415-16440184:+|isoform2=junction:chr17:16439415-16439527:+@exon:chr17:16439528-16439703:+@junction:chr17:16439704-16440184:+	LRRC75A-AS1	multimodal
isoform1=junction:chr17:16439415-16440184:+|isoform2=junction:chr17:16439415-16439580:+@exon:chr17:16439581-16439703:+@junction:chr17:16439704-16440184:+	LRRC75A-AS1	multimodal
isoform1=junction:chr17:16439415-16440184:+|isoform2=junction:chr17:16439415-16439659:+@exon:chr17:16439660-16439703:+@junction:chr17:16439704-16440184:+	LRRC75A-AS1	excluded
isoform1=junction:chr17:16439704-16441073:+|isoform2=junction:chr17:16439704-16440184:+@exon:chr17:16440185-16440253:+@junction:chr17:16440254-16441073:+	LRRC75A-AS1	included
isoform1=junction:chr17:16440254-16441367:+|isoform2=junction:chr17:16440254-16441073:+@exon:chr17:16441074-16441130:+@junction:chr17:16441131-16441367:+	LRRC75A-AS1	included
isoform1=junction:chr17:17271009-17281131:-|isoform2=junction:chr17:17276165-17281131:-@exon:chr17:17276035-17276164:-@junction:chr17:17271009-17276034:-	COPS3	included
isoform1=junction:chr17:17882864-17893660:-|isoform2=junction:chr17:17884769-17893660:-@exon:chr17:17884634-17884768:-@junction:chr17:17882864-17884633:-	TOM1L2	included
isoform1=junction:chr17:21021227-21042664:-|isoform2=junction:chr17:21028675-21042664:-@exon:chr17:21028542-21028674:-@junction:chr17:21021227-21028541:-	USP22	included
isoform1=junction:chr17:21302260-21304425:+|isoform2=junction:chr17:21302260-21303182:+@exon:chr17:21303183-21303234:+@junction:chr17:21303235-21304425:+	MAP2K3	included
isoform1=junction:chr17:27294436-27303366:+|isoform2=junction:chr17:27294436-27301787:+@exon:chr17:27301788-27301956:+@junction:chr17:27301957-27303366:+	WSB1	included
isoform1=junction:chr17:27309273-27311508:+|isoform2=junction:chr17:27309273-27310060:+@exon:chr17:27310061-27310174:+@junction:chr17:27310175-27311508:+	WSB1	included
isoform1=junction:chr17:30116864-30118079:+|isoform2=junction:chr17:30116864-30117301:+@novel_exon:chr17:30117302-30117383:+@junction:chr17:30117384-30118079:+	NSRP1	multimodal
isoform1=junction:chr17:30484771-30492678:+|isoform2=junction:chr17:30484771-30490125:+@exon:chr17:30490126-30490217:+@junction:chr17:30490218-30492678:+	GOSR1	included
isoform1=junction:chr17:32360968-32362913:+|isoform2=junction:chr17:32360968-32361467:+@exon:chr17:32361468-32361515:+@junction:chr17:32361516-32362913:+	ZNF207	bimodal
isoform1=junction:chr17:32365488-32367771:+|isoform2=junction:chr17:32365488-32366664:+@exon:chr17:32366665-32366757:+@junction:chr17:32366758-32367771:+	ZNF207	multimodal
isoform1=junction:chr17:36486786-36492812:+|isoform2=junction:chr17:36486786-36486934:+@exon:chr17:36486935-36486966:+@junction:chr17:36486967-36492812:+	ZNHIT3	bimodal
isoform1=junction:chr17:3720403-3723687:-|isoform2=junction:chr17:3723384-3723687:-@exon:chr17:3723288-3723383:-@junction:chr17:3720403-3723287:-	ITGAE	bimodal
isoform1=junction:chr17:38755991-38762410:+|isoform2=junction:chr17:38755991-38760430:+@exon:chr17:38760431-38760608:+@junction:chr17:38760609-38762410:+	PSMB3	included
isoform1=junction:chr17:39744208-39744885:+|isoform2=junction:chr17:39744208-39744552:+@exon:chr17:39744553-39744663:+@junction:chr17:39744664-39744885:+	GRB7	included
isoform1=junction:chr17:40928608-40931372:-|isoform2=junction:chr17:40930097-40931372:-@exon:chr17:40929940-40930096:-@junction:chr17:40928608-40929939:-	KRT23	included
isoform1=junction:chr17:41524541-41525190:-|isoform2=junction:chr17:41525000-41525190:-@exon:chr17:41524843-41524999:-@junction:chr17:41524541-41524842:-	KRT19	included
isoform1=junction:chr17:41827627-41830800:-|isoform2=junction:chr17:41828953-41830800:-@exon:chr17:41828790-41828952:-@junction:chr17:41827627-41828789:-	NT5C3B	included
isoform1=junction:chr17:44322529-44323283:-|isoform2=junction:chr17:44322853-44323283:-@exon:chr17:44322808-44322852:-@junction:chr17:44322529-44322807:-	SLC25A39	included
isoform1=junction:chr17:49705897-49706964:-|isoform2=junction:chr17:49706335-49706964:-@exon:chr17:49706204-49706334:-@junction:chr17:49705897-49706203:-	SLC35B1	included
isoform1=junction:chr17:50070931-50071985:+|isoform2=junction:chr17:50070931-50071310:+@exon:chr17:50071311-50071518:+@junction:chr17:50071519-50071985:+	ITGA3	included
isoform1=junction:chr17:51168344-51171486:+|isoform2=junction:chr17:51168344-51169936:+@exon:chr17:51169937-51170049:+@junction:chr17:51170050-51171486:+	NME1-NME2	included
isoform1=junction:chr17:5422830-5432541:+|isoform2=junction:chr17:5422830-5425970:+@exon:chr17:5425971-5426299:+@junction:chr17:5426300-5432541:+	RPAIN	bimodal
isoform1=junction:chr17:5422830-5432541:+|isoform2=junction:chr17:5422830-5425970:+@exon:chr17:5425971-5428211:+@junction:chr17:5428212-5432541:+	RPAIN	bimodal
isoform1=junction:chr17:5426083-5432541:+|isoform2=junction:chr17:5426083-5426235:+@exon:chr17:5426236-5426299:+@junction:chr17:5426300-5432541:+	RPAIN	multimodal
isoform1=junction:chr17:5426300-5432541:+|isoform2=junction:chr17:5426300-5428070:+@exon:chr17:5428071-5428211:+@junction:chr17:5428212-5432541:+	RPAIN	bimodal
isoform1=junction:chr1:75724818-75732643:+|isoform2=junction:chr1:75724818-75728400:+@exon:chr1:75728401-75728488:+@junction:chr1:75728489-75732643:+	ACADM	included
isoform1=junction:chr1:75732923-75734790:+|isoform2=junction:chr1:75732923-75733527:+@exon:chr1:75733528-75733628:+@junction:chr1:75733629-75734790:+	ACADM	included
isoform1=junction:chr1:75787605-75789951:+|isoform2=junction:chr1:75787605-75789158:+@exon:chr1:75789159-75789356:+@junction:chr1:75789357-75789951:+	RABGGTB	multimodal
isoform1=junction:chr17:58347242-58351401:-|isoform2=junction:chr17:58347585-58351401:-@exon:chr17:58347529-58347584:-@junction:chr17:58347242-58347528:-	SUPT4H1	included
isoform1=junction:chr17:60083767-60088196:-|isoform2=junction:chr17:60085204-60088196:-@exon:chr17:60085055-60085203:-@junction:chr17:60083767-60085054:-	WFDC21P	included
isoform1=junction:chr17:60083767-60088196:-|isoform2=junction:chr17:60085204-60088196:-@exon:chr17:60085103-60085203:-@junction:chr17:60083767-60085102:-	WFDC21P	included
isoform1=junction:chr17:60083767-60088196:-|isoform2=junction:chr17:60085204-60088196:-@exon:chr17:60085113-60085203:-@junction:chr17:60083767-60085112:-	WFDC21P	included
isoform1=junction:chr17:64500327-64502009:-|isoform2=junction:chr17:64500774-64502009:-@exon:chr17:64500549-64500773:-@junction:chr17:64500327-64500548:-	DDX5	included
isoform1=junction:chr17:68433576-68435619:-|isoform2=junction:chr17:68434627-68435619:-@exon:chr17:68434556-68434626:-@junction:chr17:68433576-68434555:-	WIPI1	multimodal
isoform1=junction:chr17:7012762-7013665:+|isoform2=junction:chr17:7012762-7013318:+@exon:chr17:7013319-7013516:+@junction:chr17:7013517-7013665:+	RNASEK	excluded
isoform1=junction:chr17:7224070-7224320:+|isoform2=junction:chr17:7224070-7224145:+@exon:chr17:7224146-7224243:+@junction:chr17:7224244-7224320:+	ACADVL	included
isoform1=junction:chr17:75039272-75042180:-|isoform2=junction:chr17:75040164-75042180:-@exon:chr17:75040092-75040163:-@junction:chr17:75039272-75040091:-	ATP5H	included
isoform1=junction:chr17:75267631-75268082:-|isoform2=junction:chr17:75267902-75268082:-@exon:chr17:75267746-75267901:-@junction:chr17:75267631-75267745:-	MIF4GD	bimodal
isoform1=junction:chr17:75321828-75332699:-|isoform2=junction:chr17:75326021-75332699:-@exon:chr17:75325898-75326020:-@junction:chr17:75321828-75325897:-	GRB2	included
isoform1=junction:chr17:75574261-75574609:+|isoform2=junction:chr17:75574261-75574452:+@exon:chr17:75574453-75574495:+@junction:chr17:75574496-75574609:+	LLGL2	multimodal
isoform1=junction:chr17:75668626-75693439:+|isoform2=junction:chr17:75668626-75671815:+@exon:chr17:75671816-75671863:+@junction:chr17:75671864-75693439:+	SAP30BP	included
isoform1=junction:chr17:7577917-7578341:+|isoform2=junction:chr17:7577917-7578164:+@exon:chr17:7578165-7578244:+@junction:chr17:7578245-7578341:+	SENP3-EIF4A1	included
isoform1=junction:chr17:76735159-76736153:-|isoform2=junction:chr17:76735876-76736153:-@exon:chr17:76735772-76735875:-@junction:chr17:76735159-76735771:-	SRSF2	excluded
isoform1=junction:chr17:78119393-78121012:-|isoform2=junction:chr17:78120833-78121012:-@exon:chr17:78120653-78120832:-@junction:chr17:78119393-78120652:-	TMC6	multimodal
isoform1=junction:chr17:78124782-78125157:-|isoform2=junction:chr17:78124986-78125157:-@exon:chr17:78124889-78124985:-@junction:chr17:78124782-78124888:-	TMC6	multimodal
isoform1=junction:chr17:78171055-78171738:+|isoform2=junction:chr17:78171055-78171509:+@exon:chr17:78171510-78171649:+@junction:chr17:78171650-78171738:+	SYNGR2	included
isoform1=junction:chr17:78175619-78185054:-|isoform2=junction:chr17:78182683-78185054:-@exon:chr17:78182589-78182682:-@junction:chr17:78175619-78182588:-	TK1	included
isoform1=junction:chr17:78214790-78223464:+|isoform2=junction:chr17:78214790-78216663:+@exon:chr17:78216664-78216781:+@junction:chr17:78216782-78223464:+	BIRC5	included
isoform1=junction:chr1:77968204-77969924:-|isoform2=junction:chr1:77969085-77969924:-@exon:chr1:77969022-77969084:-@junction:chr1:77968204-77969021:-	FUBP1	excluded
isoform1=junction:chr17:80101626-80104554:+|isoform2=junction:chr17:80101626-80101810:+@exon:chr17:80101811-80101890:+@junction:chr17:80101891-80104554:+	GAA	included
isoform1=junction:chr17:80139163-80140007:-|isoform2=junction:chr17:80139751-80140007:-@exon:chr17:80139670-80139750:-@junction:chr17:80139163-80139669:-	EIF4A3	included
isoform1=junction:chr17:81893615-81899919:+|isoform2=junction:chr17:81893615-81894466:+@exon:chr17:81894467-81894586:+@junction:chr17:81894587-81899919:+	ANAPC11	included
isoform1=junction:chr17:81933377-81934652:-|isoform2=junction:chr17:81934490-81934652:-@exon:chr17:81934326-81934489:-@junction:chr17:81933377-81934325:-	PYCR1	bimodal
isoform1=junction:chr17:82019382-82019857:-|isoform2=junction:chr17:82019695-82019857:-@exon:chr17:82019641-82019694:-@junction:chr17:82019382-82019640:-	CENPX	multimodal
isoform1=junction:chr17:82472699-82478799:+|isoform2=junction:chr17:82472699-82478570:+@exon:chr17:82478571-82478667:+@junction:chr17:82478668-82478799:+	NARF	bimodal
isoform1=junction:chr1:78649906-78654242:+|isoform2=junction:chr1:78649906-78650185:+@exon:chr1:78650186-78650652:+@junction:chr1:78650653-78654242:+	IFI44	multimodal
isoform1=junction:chr18:12308350-12310942:+|isoform2=junction:chr18:12308350-12308686:+@exon:chr18:12308687-12308795:+@junction:chr18:12308796-12310942:+	TUBB6	included
isoform1=junction:chr18:166820-180235:+|isoform2=junction:chr18:166820-178932:+@exon:chr18:178933-179037:+@junction:chr18:179038-180235:+	USP14	included
isoform1=junction:chr18:23504448-23507984:+|isoform2=junction:chr18:23504448-23506969:+@exon:chr18:23506970-23507054:+@junction:chr18:23507055-23507984:+	C18orf8	included
isoform1=junction:chr18:26057743-26078075:-|isoform2=junction:chr18:26068558-26078075:-@exon:chr18:26068494-26068557:-@junction:chr18:26057743-26068493:-	SS18	excluded
isoform1=junction:chr18:3247910-3253232:+|isoform2=junction:chr18:3247910-3249360:+@exon:chr18:3249361-3249443:+@junction:chr18:3249444-3253232:+	MYL12A	excluded
isoform1=junction:chr18:36138873-36141136:+|isoform2=junction:chr18:36138873-36139418:+@exon:chr18:36139419-36139613:+@junction:chr18:36139614-36141136:+	ELP2	excluded
isoform1=junction:chr1:84498549-84506010:-|isoform2=junction:chr1:84501971-84506010:-@exon:chr1:84501826-84501970:-@junction:chr1:84498549-84501825:-	GNG5	included
isoform1=junction:chr1:84566013-84570581:-|isoform2=junction:chr1:84570140-84570581:-@exon:chr1:84569931-84570139:-@junction:chr1:84566013-84569930:-	CTBS	multimodal
isoform1=junction:chr18:49490928-49491531:-|isoform2=junction:chr18:49491446-49491531:-@exon:chr18:49491405-49491445:-@junction:chr18:49490928-49491404:-	RPL17	included
isoform1=junction:chr18:49491585-49492457:-|isoform2=junction:chr18:49491834-49492457:-@exon:chr18:49491736-49491833:-@junction:chr18:49491585-49491735:-	RPL17	excluded
isoform1=junction:chr18:662321-670691:+|isoform2=junction:chr18:662321-669071:+@exon:chr18:669072-669173:+@junction:chr18:669174-670691:+	TYMS	included
isoform1=junction:chr1:86863606-86880661:-|isoform2=junction:chr1:86868103-86880661:-@exon:chr1:86868053-86868102:-@junction:chr1:86863606-86868052:-	SELENOF	included
isoform1=junction:chr18:756836-812113:-|isoform2=junction:chr18:787987-812113:-@exon:chr18:787903-787986:-@junction:chr18:756836-787902:-	YES1	excluded
isoform1=junction:chr18:79973857-79988239:-|isoform2=junction:chr18:79977702-79988239:-@exon:chr18:79977598-79977701:-@junction:chr18:79973857-79977597:-	TXNL4A	included
isoform1=junction:chr18:79977702-79988239:-|isoform2=junction:chr18:79986751-79988239:-@exon:chr18:79986602-79986750:-@junction:chr18:79977702-79986601:-	TXNL4A	excluded
isoform1=junction:chr1:8871987-8878579:-|isoform2=junction:chr1:8874918-8878579:-@exon:chr1:8874824-8874917:-@junction:chr1:8871987-8874823:-	ENO1	included
isoform1=junction:chr18:9195699-9208656:+|isoform2=junction:chr18:9195699-9204475:+@exon:chr18:9204476-9204544:+@junction:chr18:9204545-9208656:+	ANKRD12	bimodal
isoform1=junction:chr18:9937067-9950394:+|isoform2=junction:chr18:9937067-9944923:+@exon:chr18:9944924-9945058:+@junction:chr18:9945059-9950394:+	VAPA	excluded
isoform1=junction:chr19:10574493-10577197:-|isoform2=junction:chr19:10575030-10577197:-@exon:chr19:10574904-10575029:-@junction:chr19:10574493-10574903:-	AP1M2	included
isoform1=junction:chr19:10679928-10681018:+|isoform2=junction:chr19:10679928-10680345:+@exon:chr19:10680346-10680443:+@junction:chr19:10680444-10681018:+	ILF3	included
isoform1=junction:chr19:1105810-1106399:+|isoform2=junction:chr19:1105810-1106241:+@exon:chr19:1106242-1106266:+@junction:chr19:1106267-1106399:+	GPX4	included
isoform1=junction:chr19:11102787-11106564:+|isoform2=junction:chr19:11102787-11105219:+@exon:chr19:11105220-11105600:+@junction:chr19:11105601-11106564:+	LDLR	multimodal
isoform1=junction:chr19:11116213-11120091:+|isoform2=junction:chr19:11116213-11116858:+@exon:chr19:11116859-11116998:+@junction:chr19:11116999-11120091:+	LDLR	included
isoform1=junction:chr19:12676143-12677290:-|isoform2=junction:chr19:12677212-12677290:-@exon:chr19:12677108-12677211:-@junction:chr19:12676143-12677107:-	DHPS	bimodal
isoform1=junction:chr19:1438893-1440018:+|isoform2=junction:chr19:1438893-1439715:+@exon:chr19:1439716-1439826:+@junction:chr19:1439827-1440018:+	RPS15	excluded
isoform1=junction:chr19:14410335-14410988:-|isoform2=junction:chr19:14410606-14410988:-@exon:chr19:14410421-14410605:-@junction:chr19:14410335-14410420:-	DDX39A	bimodal
isoform1=junction:chr19:14410335-14410988:-|isoform2=junction:chr19:14410606-14410988:-@exon:chr19:14410548-14410605:-@junction:chr19:14410335-14410547:-	DDX39A	excluded
isoform1=junction:chr19:1599561-1605359:-|isoform2=junction:chr19:1602427-1605359:-@novel_exon:chr19:1602331-1602426:-@junction:chr19:1599561-1602330:-	AC005943.1	excluded
isoform1=junction:chr19:16647262-16659394:-|isoform2=junction:chr19:16654126-16659394:-@exon:chr19:16654035-16654125:-@junction:chr19:16647262-16654034:-	AC008764.4	bimodal
isoform1=junction:chr19:18900450-18904770:-|isoform2=junction:chr19:18903424-18904770:-@exon:chr19:18903268-18903423:-@junction:chr19:18900450-18903267:-	COPE	included
isoform1=junction:chr19:19795661-19806941:-|isoform2=junction:chr19:19806127-19806941:-@exon:chr19:19806031-19806126:-@junction:chr19:19795661-19806030:-	ZNF506	bimodal
isoform1=junction:chr19:2234062-2235761:-|isoform2=junction:chr19:2234241-2235761:-@exon:chr19:2234150-2234240:-@junction:chr19:2234062-2234149:-	PLEKHJ1	included
isoform1=junction:chr19:2269745-2271781:+|isoform2=junction:chr19:2269745-2271384:+@exon:chr19:2271385-2271530:+@junction:chr19:2271531-2271781:+	OAZ1	included
isoform1=junction:chr1:92833661-92836189:+|isoform2=junction:chr1:92833661-92834778:+@exon:chr1:92834779-92834913:+@junction:chr1:92834914-92836189:+	RPL5	included
isoform1=junction:chr19:35116360-35119362:+|isoform2=junction:chr19:35116360-35117256:+@exon:chr19:35117257-35117378:+@junction:chr19:35117379-35119362:+	FXYD3	excluded
isoform1=junction:chr19:35116360-35119362:+|isoform2=junction:chr19:35116360-35119167:+@exon:chr19:35119168-35119251:+@junction:chr19:35119252-35119362:+	FXYD3	excluded
isoform1=junction:chr19:35122840-35123270:+|isoform2=junction:chr19:35122840-35122917:+@exon:chr19:35122918-35122954:+@junction:chr19:35122955-35123270:+	FXYD3	included
isoform1=junction:chr19:35158401-35164155:+|isoform2=junction:chr19:35158401-35160708:+@exon:chr19:35160709-35160801:+@junction:chr19:35160802-35164155:+	FXYD5	included
isoform1=junction:chr19:35546809-35547118:+|isoform2=junction:chr19:35546809-35546944:+@exon:chr19:35546945-35547029:+@junction:chr19:35547030-35547118:+	TMEM147	included
isoform1=junction:chr19:38264999-38287875:+|isoform2=junction:chr19:38264999-38283626:+@exon:chr19:38283627-38283797:+@junction:chr19:38283798-38287875:+	SPINT2	included
isoform1=junction:chr19:38283798-38289137:+|isoform2=junction:chr19:38283798-38287875:+@exon:chr19:38287876-38287935:+@junction:chr19:38287936-38289137:+	SPINT2	included
isoform1=junction:chr19:38632497-38634992:+|isoform2=junction:chr19:38632497-38632600:+@exon:chr19:38632601-38632678:+@junction:chr19:38632679-38634992:+	EIF3K	included
isoform1=junction:chr1:93873215-93876267:-|isoform2=junction:chr1:93875784-93876267:-@exon:chr1:93875645-93875783:-@junction:chr1:93873215-93875644:-	DNTTIP2	bimodal
isoform1=junction:chr19:39433419-39433664:-|isoform2=junction:chr19:39433570-39433664:-@exon:chr19:39433522-39433569:-@junction:chr19:39433419-39433521:-	RPS16	included
isoform1=junction:chr19:40448047-40458154:-|isoform2=junction:chr19:40451493-40458154:-@exon:chr19:40451364-40451492:-@junction:chr19:40448047-40451363:-	BLVRB	included
isoform1=junction:chr19:43511567-43526514:-|isoform2=junction:chr19:43526350-43526514:-@exon:chr19:43526201-43526349:-@junction:chr19:43511567-43526200:-	ETHE1	bimodal
isoform1=junction:chr19:43649144-43655438:-|isoform2=junction:chr19:43652372-43655438:-@exon:chr19:43652225-43652371:-@junction:chr19:43649144-43652224:-	PLAUR	multimodal
isoform1=junction:chr19:43652372-43656478:-|isoform2=junction:chr19:43655574-43656478:-@exon:chr19:43655439-43655573:-@junction:chr19:43652372-43655438:-	PLAUR	included
isoform1=junction:chr19:48474950-48478068:+|isoform2=junction:chr19:48474950-48477716:+@exon:chr19:48477717-48477719:+@junction:chr19:48477720-48478068:+	CYTH2	multimodal
isoform1=junction:chr19:54201610-54207397:+|isoform2=junction:chr19:54201610-54206275:+@exon:chr19:54206276-54206462:+@junction:chr19:54206463-54207397:+	RPS9	included
isoform1=junction:chr19:54201610-54207397:+|isoform2=junction:chr19:54201610-54206275:+@exon:chr19:54206276-54206724:+@junction:chr19:54206725-54207397:+	RPS9	included
isoform1=junction:chr19:54206463-54207397:+|isoform2=junction:chr19:54206463-54206552:+@exon:chr19:54206553-54206724:+@junction:chr19:54206725-54207397:+	RPS9	excluded
isoform1=junction:chr19:55455331-55456348:-|isoform2=junction:chr19:55455846-55456348:-@exon:chr19:55455636-55455845:-@junction:chr19:55455331-55455635:-	ISOC2	included
isoform1=junction:chr19:58388246-58393358:+|isoform2=junction:chr19:58388246-58392975:+@exon:chr19:58392976-58393185:+@junction:chr19:58393186-58393358:+	RPS5	included
isoform1=junction:chr19:7630847-7631472:+|isoform2=junction:chr19:7630847-7631231:+@exon:chr19:7631232-7631321:+@junction:chr19:7631322-7631472:+	PET100	excluded
isoform1=junction:chr19:805188-806407:+|isoform2=junction:chr19:805188-805491:+@exon:chr19:805492-805569:+@junction:chr19:805570-806407:+	PTBP1	multimodal
isoform1=junction:chr19:8366320-8371055:+|isoform2=junction:chr19:8366320-8369218:+@exon:chr19:8369219-8369332:+@junction:chr19:8369333-8371055:+	ANGPTL4	multimodal
isoform1=junction:chr19:8471428-8474166:+|isoform2=junction:chr19:8471428-8473663:+@exon:chr19:8473664-8473708:+@junction:chr19:8473709-8474166:+	HNRNPM	included
isoform1=junction:chr19:8474245-8485602:+|isoform2=junction:chr19:8474245-8483157:+@exon:chr19:8483158-8483211:+@junction:chr19:8483212-8485602:+	HNRNPM	included
isoform1=junction:chr1:999614-999865:-|isoform2=junction:chr1:999788-999865:-@exon:chr1:999692-999787:-@junction:chr1:999614-999691:-	HES4	multimodal
isoform1=junction:chr20:1372241-1392833:-|isoform2=junction:chr20:1375604-1392833:-@exon:chr20:1375491-1375603:-@junction:chr20:1372241-1375490:-	FKBP1A	included
isoform1=junction:chr20:1458275-1464328:-|isoform2=junction:chr20:1463442-1464328:-@exon:chr20:1463335-1463441:-@junction:chr20:1458275-1463334:-	NSFL1C	excluded
isoform1=junction:chr20:17570212-17600737:+|isoform2=junction:chr20:17570212-17591931:+@exon:chr20:17591932-17592063:+@junction:chr20:17592064-17600737:+	DSTN	excluded
isoform1=junction:chr20:20026920-20033101:+|isoform2=junction:chr20:20026920-20032507:+@exon:chr20:20032508-20032653:+@junction:chr20:20032654-20033101:+	NAA20	included
isoform1=junction:chr20:2465820-2467606:-|isoform2=junction:chr20:2467316-2467606:-@exon:chr20:2467192-2467315:-@junction:chr20:2465820-2467191:-	SNRPB	excluded
isoform1=junction:chr20:24964023-24968891:-|isoform2=junction:chr20:24964399-24968891:-@exon:chr20:24964375-24964398:-@junction:chr20:24964023-24964374:-	APMAP	excluded
isoform1=junction:chr20:24964023-24969525:-|isoform2=junction:chr20:24969085-24969525:-@exon:chr20:24968892-24969084:-@junction:chr20:24964023-24968891:-	APMAP	included
isoform1=junction:chr20:31550122-31559610:+|isoform2=junction:chr20:31550122-31554745:+@exon:chr20:31554746-31554829:+@junction:chr20:31554830-31559610:+	HM13	included
isoform1=junction:chr20:31561737-31569119:+|isoform2=junction:chr20:31561737-31566209:+@exon:chr20:31566210-31566295:+@junction:chr20:31566296-31569119:+	HM13	included
isoform1=junction:chr20:33994132-34072065:+|isoform2=junction:chr20:33994132-34031521:+@exon:chr20:34031522-34031604:+@junction:chr20:34031605-34072065:+	RALY	included
isoform1=junction:chr20:34073636-34075873:+|isoform2=junction:chr20:34073636-34073818:+@exon:chr20:34073819-34073866:+@junction:chr20:34073867-34075873:+	RALY	included
isoform1=junction:chr20:35280119-35284175:-|isoform2=junction:chr20:35280830-35284175:-@exon:chr20:35280654-35280829:-@junction:chr20:35280119-35280653:-	EIF6	included
isoform1=junction:chr20:35280119-35284380:-|isoform2=junction:chr20:35284262-35284380:-@exon:chr20:35284176-35284261:-@junction:chr20:35280119-35284175:-	EIF6	included
isoform1=junction:chr20:35280119-35284725:-|isoform2=junction:chr20:35284493-35284725:-@exon:chr20:35284176-35284492:-@junction:chr20:35280119-35284175:-	EIF6	included
isoform1=junction:chr20:35632026-35632310:-|isoform2=junction:chr20:35632235-35632310:-@exon:chr20:35632163-35632234:-@junction:chr20:35632026-35632162:-	CPNE1	included
isoform1=junction:chr20:35732136-35738967:-|isoform2=junction:chr20:35734258-35738967:-@exon:chr20:35734186-35734257:-@junction:chr20:35732136-35734185:-	RBM39	excluded
isoform1=junction:chr20:35732136-35738967:-|isoform2=junction:chr20:35735082-35738967:-@exon:chr20:35734186-35735081:-@junction:chr20:35732136-35734185:-	RBM39	excluded
isoform1=junction:chr20:35739018-35740823:-|isoform2=junction:chr20:35740598-35740823:-@exon:chr20:35740525-35740597:-@junction:chr20:35739018-35740524:-	RBM39	multimodal
isoform1=junction:chr20:35842745-35858301:+|isoform2=junction:chr20:35842745-35847349:+@exon:chr20:35847350-35847434:+@junction:chr20:35847435-35858301:+	PHF20	included
isoform1=junction:chr20:36607819-36609600:+@exon:chr20:36609601-36609730:+@junction:chr20:36609731-36612009:+|isoform2=junction:chr20:36607819-36607889:+@exon:chr20:36607890-36608000:+@junction:chr20:36608001-36612009:+	TGIF2-C20orf24	excluded
isoform1=junction:chr20:36607819-36609600:+|isoform2=junction:chr20:36607819-36607889:+@exon:chr20:36607890-36608000:+@junction:chr20:36608001-36609600:+	C20orf24	excluded
isoform1=junction:chr20:36607819-36612009:+|isoform2=junction:chr20:36607819-36609600:+@exon:chr20:36609601-36609730:+@junction:chr20:36609731-36612009:+	TGIF2-C20orf24	included
isoform1=junction:chr20:36608001-36612009:+|isoform2=junction:chr20:36608001-36609600:+@exon:chr20:36609601-36609730:+@junction:chr20:36609731-36612009:+	C20orf24	included
isoform1=junction:chr20:37230060-37234019:+|isoform2=junction:chr20:37230060-37232295:+@exon:chr20:37232296-37232391:+@junction:chr20:37232392-37234019:+	RPN2	included
isoform1=junction:chr20:38421099-38426418:-|isoform2=junction:chr20:38422242-38426418:-@exon:chr20:38422092-38422241:-@junction:chr20:38421099-38422091:-	SNHG17	bimodal
isoform1=junction:chr20:408780-417525:+|isoform2=junction:chr20:408780-409880:+@exon:chr20:409881-410025:+@junction:chr20:410026-417525:+	RBCK1	included
isoform1=junction:chr20:43458510-43459770:+|isoform2=junction:chr20:43458510-43459152:+@exon:chr20:43459153-43459420:+@junction:chr20:43459421-43459770:+	SRSF6	bimodal
isoform1=junction:chr20:44901834-44903992:+|isoform2=junction:chr20:44901834-44902897:+@exon:chr20:44902898-44903121:+@junction:chr20:44903122-44903992:+	YWHAB	excluded
isoform1=junction:chr20:44901834-44903992:+|isoform2=junction:chr20:44901834-44903035:+@exon:chr20:44903036-44903121:+@junction:chr20:44903122-44903992:+	YWHAB	excluded
isoform1=junction:chr20:45252420-45253574:-|isoform2=junction:chr20:45253152-45253574:-@exon:chr20:45253002-45253151:-@junction:chr20:45252420-45253001:-	SLPI	included
isoform1=junction:chr20:45416344-45419294:+|isoform2=junction:chr20:45416344-45416516:+@exon:chr20:45416517-45418979:+@junction:chr20:45418980-45419294:+	PIGT	included
isoform1=junction:chr20:45416695-45419294:+|isoform2=junction:chr20:45416695-45418851:+@exon:chr20:45418852-45418979:+@junction:chr20:45418980-45419294:+	PIGT	included
isoform1=junction:chr20:45812797-45814383:+|isoform2=junction:chr20:45812797-45813436:+@exon:chr20:45813437-45813464:+@junction:chr20:45813465-45814383:+	UBE2C	included
isoform1=junction:chr20:45813465-45815540:+|isoform2=junction:chr20:45813465-45814383:+@exon:chr20:45814384-45814470:+@junction:chr20:45814471-45815540:+	UBE2C	included
isoform1=junction:chr20:45814471-45815540:+@exon:chr20:45815541-45815745:+@junction:chr20:45815746-45815853:+|isoform2=junction:chr20:45814471-45815389:+@exon:chr20:45815390-45815540:+@junction:chr20:45815541-45815853:+	UBE2C	excluded
isoform1=junction:chr20:45814471-45815853:+|isoform2=junction:chr20:45814471-45815540:+@exon:chr20:45815541-45815745:+@junction:chr20:45815746-45815853:+	UBE2C	included
isoform1=junction:chr20:45848676-45857187:-|isoform2=junction:chr20:45855293-45857187:-@exon:chr20:45855159-45855292:-@junction:chr20:45848676-45855158:-	ACOT8	bimodal
isoform1=junction:chr20:45892028-45892397:+|isoform2=junction:chr20:45892028-45892272:+@exon:chr20:45892273-45892323:+@junction:chr20:45892324-45892397:+	CTSA	included
isoform1=junction:chr20:49154072-49174194:-|isoform2=junction:chr20:49166286-49174194:-@exon:chr20:49165997-49166285:-@junction:chr20:49154072-49165996:-	STAU1	excluded
isoform1=junction:chr20:49279209-49289044:+|isoform2=junction:chr20:49279209-49280484:+@exon:chr20:49280485-49280570:+@junction:chr20:49280571-49289044:+	ZFAS1	included
isoform1=junction:chr20:49280571-49289044:+|isoform2=junction:chr20:49280571-49280902:+@exon:chr20:49280903-49280964:+@junction:chr20:49280965-49289044:+	ZFAS1	multimodal
isoform1=junction:chr20:50830381-50876485:+|isoform2=junction:chr20:50830381-50841765:+@exon:chr20:50841766-50841900:+@junction:chr20:50841901-50876485:+	BCAS4	included
isoform1=junction:chr20:50942127-50945846:-|isoform2=junction:chr20:50945763-50945846:-@exon:chr20:50945737-50945762:-@junction:chr20:50942127-50945736:-	DPM1	included
isoform1=junction:chr20:58670604-58673630:+|isoform2=junction:chr20:58670604-58671153:+@exon:chr20:58671154-58671297:+@junction:chr20:58671298-58673630:+	STX16	included
isoform1=junction:chr20:58895685-58903530:+|isoform2=junction:chr20:58895685-58898940:+@exon:chr20:58898941-58898985:+@junction:chr20:58898986-58903530:+	GNAS	multimodal
isoform1=junction:chr20:59036761-59038465:-|isoform2=junction:chr20:59037281-59038465:-@exon:chr20:59037191-59037280:-@junction:chr20:59036761-59037190:-	PRELID3B	bimodal
isoform1=junction:chr20:62303782-62306196:+|isoform2=junction:chr20:62303782-62304460:+@exon:chr20:62304461-62304577:+@junction:chr20:62304578-62306196:+	ADRM1	included
isoform1=junction:chr20:62308179-62308654:+|isoform2=junction:chr20:62308179-62308367:+@exon:chr20:62308368-62308470:+@junction:chr20:62308471-62308654:+	ADRM1	included
isoform1=junction:chr20:62387675-62388308:+|isoform2=junction:chr20:62387675-62387842:+@exon:chr20:62387843-62387914:+@junction:chr20:62387915-62388308:+	RPS21	included
isoform1=junction:chr20:63873817-63882718:+|isoform2=junction:chr20:63873817-63875815:+@exon:chr20:63875816-63875875:+@junction:chr20:63875876-63882718:+	TPD52L2	bimodal
isoform1=junction:chr2:119367061-119368187:+|isoform2=junction:chr2:119367061-119367558:+@exon:chr2:119367559-119367644:+@junction:chr2:119367645-119368187:+	DBI	excluded
isoform1=junction:chr2:119367061-119368187:+|isoform2=junction:chr2:119367061-119367563:+@novel_exon:chr2:119367564-119367644:+@junction:chr2:119367645-119368187:+	DBI	excluded
isoform1=junction:chr21:25729802-25734852:-|isoform2=junction:chr21:25734376-25734852:-@exon:chr21:25734333-25734375:-@junction:chr21:25729802-25734332:-	ATP5J	excluded
isoform1=junction:chr21:25897674-25911740:-|isoform2=junction:chr21:25905078-25911740:-@exon:chr21:25905024-25905077:-@junction:chr21:25897674-25905023:-	APP	included
isoform1=junction:chr21:25982478-26000014:-|isoform2=junction:chr21:25997417-26000014:-@exon:chr21:25997360-25997416:-@junction:chr21:25982478-25997359:-	APP	multimodal
isoform1=junction:chr21:25982478-26021839:-|isoform2=junction:chr21:26000183-26021839:-@exon:chr21:26000015-26000182:-@junction:chr21:25982478-26000014:-	APP	included
isoform1=junction:chr21:33907454-33912288:-|isoform2=junction:chr21:33909212-33912288:-@exon:chr21:33909082-33909211:-@junction:chr21:33907454-33909081:-	AP000311.1	included
isoform1=junction:chr21:34073746-34142407:+|isoform2=junction:chr21:34073746-34125340:+@exon:chr21:34125341-34125480:+@junction:chr21:34125481-34142407:+	MRPS6	included
isoform1=junction:chr2:135742012-135748266:+|isoform2=junction:chr2:135742012-135742541:+@novel_exon:chr2:135742542-135742594:+@junction:chr2:135742595-135748266:+	UBXN4	excluded
isoform1=junction:chr2:135911494-135914468:-|isoform2=junction:chr2:135912567-135914468:-@exon:chr2:135912486-135912566:-@junction:chr2:135911494-135912485:-	DARS	bimodal
isoform1=junction:chr21:39345275-39348291:-|isoform2=junction:chr21:39345959-39348291:-@exon:chr21:39345830-39345958:-@junction:chr21:39345275-39345829:-	HMGN1	excluded
isoform1=junction:chr21:41250902-41275370:+|isoform2=junction:chr21:41250902-41257157:+@exon:chr21:41257158-41257326:+@junction:chr21:41257327-41275370:+	BACE2	bimodal
isoform1=junction:chr2:142877737-142885348:+|isoform2=junction:chr2:142877737-142881344:+@exon:chr2:142881345-142881430:+@junction:chr2:142881431-142885348:+	KYNU	excluded
isoform1=junction:chr21:44865448-44873501:-|isoform2=junction:chr21:44865651-44873501:-@exon:chr21:44865571-44865650:-@junction:chr21:44865448-44865570:-	PTTG1IP	excluded
isoform1=junction:chr2:150474985-150487267:-|isoform2=junction:chr2:150486782-150487267:-@exon:chr2:150486694-150486781:-@junction:chr2:150474985-150486693:-	RND3	included
isoform1=junction:chr2:152677476-152679351:-|isoform2=junction:chr2:152679110-152679351:-@exon:chr2:152679056-152679109:-@junction:chr2:152677476-152679055:-	PRPF40A	bimodal
isoform1=junction:chr2:159743254-159747804:+|isoform2=junction:chr2:159743254-159745769:+@exon:chr2:159745770-159745937:+@junction:chr2:159745938-159747804:+	2021-03-07	included
isoform1=junction:chr2:160281365-160284774:-|isoform2=junction:chr2:160282305-160284774:-@exon:chr2:160282257-160282304:-@junction:chr2:160281365-160282256:-	RBMS1	bimodal
isoform1=junction:chr2:169819644-169821942:-|isoform2=junction:chr2:169821274-169821942:-@exon:chr2:169821092-169821273:-@junction:chr2:169819644-169821091:-	METTL5	included
isoform1=junction:chr2:183133624-183157443:+|isoform2=junction:chr2:183133624-183151507:+@exon:chr2:183151508-183151649:+@junction:chr2:183151650-183157443:+	NUP35	multimodal
isoform1=junction:chr2:200329481-200389222:+|isoform2=junction:chr2:200329481-200383866:+@exon:chr2:200383867-200384017:+@junction:chr2:200384018-200389222:+	SPATS2L	excluded
isoform1=junction:chr2:200853994-200855003:-|isoform2=junction:chr2:200854696-200855003:-@exon:chr2:200854616-200854695:-@junction:chr2:200853994-200854615:-	CLK1	included
isoform1=junction:chr2:200859747-200861237:-|isoform2=junction:chr2:200860216-200861237:-@exon:chr2:200860125-200860215:-@junction:chr2:200859747-200860124:-	CLK1	multimodal
isoform1=junction:chr2:202292904-202297378:+|isoform2=junction:chr2:202292904-202295673:+@exon:chr2:202295674-202295837:+@junction:chr2:202295838-202297378:+	NOP58	included
isoform1=junction:chr2:206149926-206153617:-|isoform2=junction:chr2:206152511-206153617:-@exon:chr2:206152419-206152510:-@junction:chr2:206149926-206152418:-	NDUFS1	included
isoform1=junction:chr2:215379318-215382211:-|isoform2=junction:chr2:215381081-215382211:-@exon:chr2:215380811-215381080:-@junction:chr2:215379318-215380810:-	FN1	multimodal
isoform1=junction:chr2:215391815-215394527:-|isoform2=junction:chr2:215393204-215394527:-@exon:chr2:215392931-215393203:-@junction:chr2:215391815-215392930:-	FN1	multimodal
isoform1=junction:chr2:218228851-218238663:+|isoform2=junction:chr2:218228851-218234351:+@exon:chr2:218234352-218234397:+@junction:chr2:218234398-218238663:+	ARPC2	included
isoform1=junction:chr22:18906726-18910171:+|isoform2=junction:chr22:18906726-18909979:+@exon:chr22:18909980-18910098:+@junction:chr22:18910099-18910171:+	AC007326.4	multimodal
isoform1=junction:chr2:227340381-227355676:+|isoform2=junction:chr2:227340381-227347225:+@exon:chr2:227347226-227347384:+@junction:chr2:227347385-227355676:+	MFF	bimodal
isoform1=junction:chr2:227340381-227355676:+|isoform2=junction:chr2:227340381-227352513:+@exon:chr2:227352514-227352573:+@junction:chr2:227352574-227355676:+	MFF	excluded
isoform1=junction:chr2:230216929-230219873:-|isoform2=junction:chr2:230218063-230219873:-@novel_exon:chr2:230217978-230218062:-@junction:chr2:230216929-230217977:-	SP110	bimodal
isoform1=junction:chr2:231455625-231456630:-|isoform2=junction:chr2:231456137-231456630:-@exon:chr2:231456010-231456136:-@junction:chr2:231455625-231456009:-	NCL	included
isoform1=junction:chr22:31619837-31620995:-|isoform2=junction:chr22:31620714-31620995:-@exon:chr22:31620553-31620713:-@junction:chr22:31619837-31620552:-	PISD	bimodal
isoform1=junction:chr22:31944821-31956138:+|isoform2=junction:chr22:31944821-31945556:+@exon:chr22:31945557-31945678:+@junction:chr22:31945679-31956138:+	YWHAH	bimodal
isoform1=junction:chr22:36467918-36480574:-|isoform2=junction:chr22:36476857-36480574:-@exon:chr22:36476733-36476856:-@junction:chr22:36467918-36476732:-	TXN2	included
isoform1=junction:chr2:237518649-237525600:+|isoform2=junction:chr2:237518649-237519909:+@exon:chr2:237519910-237520029:+@junction:chr2:237520030-237525600:+	MLPH	included
isoform1=junction:chr2:237527517-237540347:+|isoform2=junction:chr2:237527517-237534563:+@exon:chr2:237534564-237534647:+@junction:chr2:237534648-237540347:+	MLPH	excluded
isoform1=junction:chr2:237540534-237542566:+|isoform2=junction:chr2:237540534-237540801:+@exon:chr2:237540802-237540957:+@junction:chr2:237540958-237542566:+	MLPH	included
isoform1=junction:chr22:37677066-37679602:+|isoform2=junction:chr22:37677066-37678482:+@exon:chr22:37678483-37678654:+@junction:chr22:37678655-37679602:+	LGALS1	included
isoform1=junction:chr2:237692522-237748363:+|isoform2=junction:chr2:237692522-237708543:+@exon:chr2:237708544-237708630:+@junction:chr2:237708631-237748363:+	LRRFIP1	included
isoform1=junction:chr22:39313311-39314106:-|isoform2=junction:chr22:39313730-39314106:-@exon:chr22:39313634-39313729:-@junction:chr22:39313311-39313633:-	RPL3	included
isoform1=junction:chr22:40350036-40354247:+|isoform2=junction:chr22:40350036-40353072:+@exon:chr22:40353073-40353117:+@junction:chr22:40353118-40354247:+	ADSL	included
isoform1=junction:chr22:40951477-40964046:+|isoform2=junction:chr22:40951477-40953554:+@exon:chr22:40953555-40953633:+@junction:chr22:40953634-40964046:+	RBX1	included
isoform1=junction:chr22:40964118-40972475:+|isoform2=junction:chr22:40964118-40967798:+@exon:chr22:40967799-40967884:+@junction:chr22:40967885-40972475:+	RBX1	included
isoform1=junction:chr2:241315983-241324215:+|isoform2=junction:chr2:241315983-241317498:+@exon:chr2:241317499-241317599:+@junction:chr2:241317600-241324215:+	2021-09-02	multimodal
isoform1=junction:chr2:241315983-241325992:+|isoform2=junction:chr2:241315983-241324215:+@exon:chr2:241324216-241324241:+@junction:chr2:241324242-241325992:+	2021-09-02	included
isoform1=junction:chr2:241678650-241685768:-|isoform2=junction:chr2:241680320-241685768:-@exon:chr2:241680229-241680319:-@junction:chr2:241678650-241680228:-	DTYMK	multimodal
isoform1=junction:chr22:41939197-41945224:-|isoform2=junction:chr22:41943702-41945224:-@exon:chr22:41943610-41943701:-@junction:chr22:41939197-41943609:-	CENPM	included
isoform1=junction:chr22:42560266-42571120:+|isoform2=junction:chr22:42560266-42566303:+@exon:chr22:42566304-42566338:+@junction:chr22:42566339-42571120:+	SERHL2	included
isoform1=junction:chr22:43151605-43161051:+|isoform2=junction:chr22:43151605-43159209:+@exon:chr22:43159210-43159420:+@junction:chr22:43159421-43161051:+	TSPO	included
isoform1=junction:chr22:50527718-50529135:-|isoform2=junction:chr22:50528611-50529135:-@exon:chr22:50528512-50528610:-@junction:chr22:50527718-50528511:-	TYMP	included
isoform1=junction:chr2:26254475-26269952:+|isoform2=junction:chr2:26254475-26263379:+@exon:chr2:26263380-26263479:+@junction:chr2:26263480-26269952:+	HADHB	included
isoform1=junction:chr2:271940-272191:+@exon:chr2:272192-272305:+@junction:chr2:272306-275139:+|isoform2=junction:chr2:271940-272036:+@exon:chr2:272037-272150:+@junction:chr2:272151-275139:+	ACP1	multimodal
isoform1=junction:chr2:27201114-27201665:-|isoform2=junction:chr2:27201454-27201665:-@exon:chr2:27201350-27201453:-@junction:chr2:27201114-27201349:-	SLC5A6	included
isoform1=junction:chr2:27206094-27206876:-|isoform2=junction:chr2:27206535-27206876:-@exon:chr2:27206483-27206534:-@junction:chr2:27206094-27206482:-	SLC5A6	included
isoform1=junction:chr2:27309982-27312213:-|isoform2=junction:chr2:27311952-27312213:-@exon:chr2:27311899-27311951:-@junction:chr2:27309982-27311898:-	MPV17	included
isoform1=junction:chr2:27313110-27322447:-|isoform2=junction:chr2:27317174-27322447:-@exon:chr2:27317078-27317173:-@junction:chr2:27313110-27317077:-	MPV17	excluded
isoform1=junction:chr2:27313110-27322447:-|isoform2=junction:chr2:27317235-27322447:-@exon:chr2:27317078-27317234:-@junction:chr2:27313110-27317077:-	MPV17	bimodal
isoform1=junction:chr2:27442902-27443397:+|isoform2=junction:chr2:27442902-27443073:+@exon:chr2:27443074-27443280:+@junction:chr2:27443281-27443397:+	KRTCAP3	included
isoform1=junction:chr2:27772693-27779432:+|isoform2=junction:chr2:27772693-27774423:+@exon:chr2:27774424-27774530:+@junction:chr2:27774531-27779432:+	MRPL33	multimodal
isoform1=junction:chr2:27890843-27894532:+|isoform2=junction:chr2:27890843-27892382:+@exon:chr2:27892383-27892448:+@junction:chr2:27892449-27894532:+	BABAM2	multimodal
isoform1=junction:chr2:38745188-38746693:-|isoform2=junction:chr2:38746180-38746693:-@exon:chr2:38746144-38746179:-@junction:chr2:38745188-38746143:-	SRSF7	included
isoform1=junction:chr2:38748654-38749528:-|isoform2=junction:chr2:38749347-38749528:-@exon:chr2:38748898-38749346:-@junction:chr2:38748654-38748897:-	SRSF7	multimodal
isoform1=junction:chr2:54973622-54974694:-|isoform2=junction:chr2:54973868-54974694:-@exon:chr2:54973821-54973867:-@junction:chr2:54973622-54973820:-	RTN4	included
isoform1=junction:chr2:61868707-61872081:-|isoform2=junction:chr2:61869554-61872081:-@exon:chr2:61869440-61869553:-@junction:chr2:61868707-61869439:-	CCT4	included
isoform1=junction:chr2:61885073-61888380:-|isoform2=junction:chr2:61888258-61888380:-@novel_exon:chr2:61888199-61888257:-@junction:chr2:61885073-61888198:-	CCT4	excluded
isoform1=junction:chr2:65089071-65097970:-|isoform2=junction:chr2:65091079-65097970:-@exon:chr2:65090983-65091078:-@junction:chr2:65089071-65090982:-	RAB1A	included
isoform1=junction:chr2:70224630-70227734:-|isoform2=junction:chr2:70225394-70227734:-@exon:chr2:70225328-70225393:-@junction:chr2:70224630-70225327:-	TIA1	excluded
isoform1=junction:chr2:70227823-70229263:-|isoform2=junction:chr2:70229092-70229263:-@exon:chr2:70229059-70229091:-@junction:chr2:70227823-70229058:-	TIA1	bimodal
isoform1=junction:chr2:70288193-70293617:-|isoform2=junction:chr2:70289373-70293617:-@exon:chr2:70289350-70289372:-@junction:chr2:70288193-70289349:-	SNRPG	included
isoform1=junction:chr2:73250439-73252639:+|isoform2=junction:chr2:73250439-73251225:+@exon:chr2:73251226-73251432:+@junction:chr2:73251433-73252639:+	CCT7	included
isoform1=junction:chr2:73927053-73946718:+|isoform2=junction:chr2:73927053-73938909:+@exon:chr2:73938910-73939022:+@junction:chr2:73939023-73946718:+	DGUOK	bimodal
isoform1=junction:chr2:73927053-73958145:+|isoform2=junction:chr2:73927053-73946718:+@exon:chr2:73946719-73946906:+@junction:chr2:73946907-73958145:+	DGUOK	multimodal
isoform1=junction:chr2:73946907-73957124:+|isoform2=junction:chr2:73946907-73950584:+@exon:chr2:73950585-73950732:+@junction:chr2:73950733-73957124:+	DGUOK	included
isoform1=junction:chr2:73946907-73958145:+|isoform2=junction:chr2:73946907-73957124:+@exon:chr2:73957125-73957240:+@junction:chr2:73957241-73958145:+	DGUOK	bimodal
isoform1=junction:chr2:74135659-74145188:-|isoform2=junction:chr2:74142361-74145188:-@exon:chr2:74142272-74142360:-@junction:chr2:74135659-74142271:-	BOLA3	included
isoform1=junction:chr2:74205890-74207703:+|isoform2=junction:chr2:74205890-74205981:+@exon:chr2:74205982-74206088:+@junction:chr2:74206089-74207703:+	MTHFD2	bimodal
isoform1=junction:chr2:74423386-74423854:+|isoform2=junction:chr2:74423386-74423477:+@exon:chr2:74423478-74423531:+@junction:chr2:74423532-74423854:+	WDR54	included
isoform1=junction:chr2:74472253-74472568:-|isoform2=junction:chr2:74472471-74472568:-@exon:chr2:74472358-74472470:-@junction:chr2:74472253-74472357:-	MRPL53	included
isoform1=junction:chr2:74528490-74529131:-|isoform2=junction:chr2:74528936-74529131:-@exon:chr2:74528751-74528935:-@junction:chr2:74528490-74528750:-	AUP1	included
isoform1=junction:chr2:84431660-84433351:-|isoform2=junction:chr2:84432355-84433351:-@novel_exon:chr2:84432318-84432354:-@junction:chr2:84431660-84432317:-	SUCLG1	excluded
isoform1=junction:chr2:84433436-84441046:-|isoform2=junction:chr2:84436128-84441046:-@novel_exon:chr2:84436052-84436127:-@junction:chr2:84433436-84436051:-	SUCLG1	excluded
isoform1=junction:chr2:85577650-85581575:+|isoform2=junction:chr2:85577650-85579008:+@exon:chr2:85579009-85579167:+@junction:chr2:85579168-85581575:+	VAMP8	included
isoform1=junction:chr2:85596650-85597103:+|isoform2=junction:chr2:85596650-85596821:+@exon:chr2:85596822-85596931:+@junction:chr2:85596932-85597103:+	RNF181	included
isoform1=junction:chr2:9406906-9408112:-|isoform2=junction:chr2:9407599-9408112:-@exon:chr2:9407449-9407598:-@junction:chr2:9406906-9407448:-	ITGB1BP1	bimodal
isoform1=junction:chr2:9474648-9478221:+|isoform2=junction:chr2:9474648-9475986:+@exon:chr2:9475987-9476039:+@junction:chr2:9476040-9478221:+	IAH1	bimodal
isoform1=junction:chr3:100341162-100346180:+|isoform2=junction:chr3:100341162-100345584:+@exon:chr3:100345585-100345678:+@junction:chr3:100345679-100346180:+	NIT2	included
isoform1=junction:chr3:100341162-100348802:+|isoform2=junction:chr3:100341162-100345584:+@exon:chr3:100345585-100346255:+@junction:chr3:100346256-100348802:+	NIT2	included
isoform1=junction:chr3:100345679-100348802:+|isoform2=junction:chr3:100345679-100346180:+@exon:chr3:100346181-100346255:+@junction:chr3:100346256-100348802:+	NIT2	bimodal
isoform1=junction:chr3:108047293-108050577:-|isoform2=junction:chr3:108049652-108050577:-@exon:chr3:108049619-108049651:-@junction:chr3:108047293-108049618:-	CD47	multimodal
isoform1=junction:chr3:108047293-108051938:-|isoform2=junction:chr3:108050603-108051938:-@exon:chr3:108050578-108050602:-@junction:chr3:108047293-108050577:-	CD47	multimodal
isoform1=junction:chr3:108047293-108057476:-|isoform2=junction:chr3:108051971-108057476:-@exon:chr3:108051939-108051970:-@junction:chr3:108047293-108051938:-	CD47	bimodal
isoform1=junction:chr3:113784439-113786231:+|isoform2=junction:chr3:113784439-113784695:+@exon:chr3:113784696-113784833:+@junction:chr3:113784834-113786231:+	ATP6V1A	included
isoform1=junction:chr3:119498928-119503531:+|isoform2=junction:chr3:119498928-119500694:+@exon:chr3:119500695-119500860:+@junction:chr3:119500861-119503531:+	TIMMDC1	included
isoform1=junction:chr3:124730628-124737567:+|isoform2=junction:chr3:124730628-124735092:+@exon:chr3:124735093-124735246:+@junction:chr3:124735247-124737567:+	UMPS	included
isoform1=junction:chr3:127576697-127576989:-|isoform2=junction:chr3:127576894-127576989:-@exon:chr3:127576821-127576893:-@junction:chr3:127576697-127576820:-	TPRA1	bimodal
isoform1=junction:chr3:127695191-127721052:-|isoform2=junction:chr3:127710666-127721052:-@exon:chr3:127710576-127710665:-@junction:chr3:127695191-127710575:-	MGLL	included
isoform1=junction:chr3:127710666-127721052:-|isoform2=junction:chr3:127715931-127721052:-@exon:chr3:127715853-127715930:-@junction:chr3:127710666-127715852:-	MGLL	excluded
isoform1=junction:chr3:129288998-129298353:+|isoform2=junction:chr3:129288998-129290678:+@exon:chr3:129290679-129290804:+@junction:chr3:129290805-129298353:+	HMCES	included
isoform1=junction:chr3:141738517-141745158:+|isoform2=junction:chr3:141738517-141743508:+@exon:chr3:141743509-141743556:+@junction:chr3:141743557-141745158:+	RNF7	included
isoform1=junction:chr3:146517168-146525604:-|isoform2=junction:chr3:146522054-146525604:-@exon:chr3:146521544-146522053:-@junction:chr3:146517168-146521543:-	PLSCR1	bimodal
isoform1=junction:chr3:146525648-146533469:-|isoform2=junction:chr3:146528832-146533469:-@exon:chr3:146528614-146528831:-@junction:chr3:146525648-146528613:-	PLSCR1	multimodal
isoform1=junction:chr3:149009403-149026759:+|isoform2=junction:chr3:149009403-149024052:+@exon:chr3:149024053-149024272:+@junction:chr3:149024273-149026759:+	GYG1	bimodal
isoform1=junction:chr3:149371868-149375679:-|isoform2=junction:chr3:149375589-149375679:-@exon:chr3:149375443-149375588:-@junction:chr3:149371868-149375442:-	TM4SF1	included
isoform1=junction:chr3:150544499-150546051:-|isoform2=junction:chr3:150545779-150546051:-@exon:chr3:150545703-150545778:-@junction:chr3:150544499-150545702:-	SERP1	included
isoform1=junction:chr3:157150382-157152176:-|isoform2=junction:chr3:157151931-157152176:-@exon:chr3:157151729-157151930:-@junction:chr3:157150382-157151728:-	CCNL1	bimodal
isoform1=junction:chr3:157150382-157152176:-|isoform2=junction:chr3:157151931-157152176:-@exon:chr3:157151917-157151930:-@junction:chr3:157150382-157151916:-	CCNL1	excluded
isoform1=junction:chr3:158704928-158713796:-|isoform2=junction:chr3:158710934-158713796:-@exon:chr3:158710738-158710933:-@junction:chr3:158704928-158710737:-	RARRES1	included
isoform1=junction:chr3:158804372-158807039:+|isoform2=junction:chr3:158804372-158805361:+@exon:chr3:158805362-158805474:+@junction:chr3:158805475-158807039:+	MFSD1	included
isoform1=junction:chr3:161346356-161359801:-|isoform2=junction:chr3:161348104-161359801:-@exon:chr3:161347965-161348103:-@junction:chr3:161346356-161347964:-	SPTSSB	multimodal
isoform1=junction:chr3:16260830-16264768:-|isoform2=junction:chr3:16264230-16264768:-@exon:chr3:16264155-16264229:-@junction:chr3:16260830-16264154:-	DPH3	multimodal
isoform1=junction:chr3:167720274-167734805:-|isoform2=junction:chr3:167725474-167734805:-@exon:chr3:167725401-167725473:-@junction:chr3:167720274-167725400:-	PDCD10	multimodal
isoform1=junction:chr3:170145522-170171372:-|isoform2=junction:chr3:170149245-170171372:-@exon:chr3:170149086-170149244:-@junction:chr3:170145522-170149085:-	PHC3	multimodal
isoform1=junction:chr3:170263430-170270420:+|isoform2=junction:chr3:170263430-170267914:+@exon:chr3:170267915-170268000:+@junction:chr3:170268001-170270420:+	PRKCI	bimodal
isoform1=junction:chr3:172509322-172514860:-|isoform2=junction:chr3:172511660-172514860:-@exon:chr3:172511617-172511659:-@junction:chr3:172509322-172511616:-	TNFSF10	included
isoform1=junction:chr3:172755375-172756982:+|isoform2=junction:chr3:172755375-172755482:+@exon:chr3:172755483-172755575:+@junction:chr3:172755576-172756982:+	ECT2	multimodal
isoform1=junction:chr3:172759070-172761609:+|isoform2=junction:chr3:172759070-172760155:+@exon:chr3:172760156-172760263:+@junction:chr3:172760264-172761609:+	ECT2	included
isoform1=junction:chr3:179574468-179576216:+|isoform2=junction:chr3:179574468-179575402:+@exon:chr3:179575403-179575504:+@junction:chr3:179575505-179576216:+	ACTL6A	excluded
isoform1=junction:chr3:179615060-179615982:+|isoform2=junction:chr3:179615060-179615555:+@exon:chr3:179615556-179615615:+@junction:chr3:179615616-179615982:+	NDUFB5	excluded
isoform1=junction:chr3:184180252-184180848:+|isoform2=junction:chr3:184180252-184180644:+@exon:chr3:184180645-184180650:+@junction:chr3:184180651-184180848:+	AP2M1	multimodal
isoform1=junction:chr3:184365227-184368176:+|isoform2=junction:chr3:184365227-184366716:+@exon:chr3:184366717-184366800:+@junction:chr3:184366801-184368176:+	POLR2H	included
isoform1=junction:chr3:185494762-185496827:-|isoform2=junction:chr3:185495316-185496827:-@exon:chr3:185495154-185495315:-@junction:chr3:185494762-185495153:-	TMEM41A	included
isoform1=junction:chr3:186784697-186785882:+|isoform2=junction:chr3:186784697-186784961:+@exon:chr3:186784962-186785101:+@junction:chr3:186785102-186785882:+	EIF4A2	multimodal
isoform1=junction:chr3:186787883-186789124:+|isoform2=junction:chr3:186787883-186788309:+@exon:chr3:186788310-186788420:+@junction:chr3:186788421-186789124:+	EIF4A2	multimodal
isoform1=junction:chr3:32442014-32452391:+|isoform2=junction:chr3:32442014-32449453:+@exon:chr3:32449454-32449552:+@junction:chr3:32449553-32452391:+	CMTM7	bimodal
isoform1=junction:chr3:37251485-37281957:+|isoform2=junction:chr3:37251485-37273535:+@exon:chr3:37273536-37273601:+@junction:chr3:37273602-37281957:+	GOLGA4	multimodal
isoform1=junction:chr3:37282273-37289234:+|isoform2=junction:chr3:37282273-37286013:+@exon:chr3:37286014-37286061:+@junction:chr3:37286062-37289234:+	GOLGA4	bimodal
isoform1=junction:chr3:47917175-47921764:-|isoform2=junction:chr3:47918842-47921764:-@exon:chr3:47918719-47918841:-@junction:chr3:47917175-47918718:-	MAP4	bimodal
isoform1=junction:chr3:48319619-48328274:-|isoform2=junction:chr3:48321075-48328274:-@exon:chr3:48321025-48321074:-@junction:chr3:48319619-48321024:-	SPINK8	multimodal
isoform1=junction:chr3:49674622-49675693:+|isoform2=junction:chr3:49674622-49675182:+@exon:chr3:49675183-49675309:+@junction:chr3:49675310-49675693:+	APEH	bimodal
isoform1=junction:chr3:50642333-50645709:+|isoform2=junction:chr3:50642333-50644408:+@exon:chr3:50644409-50644532:+@junction:chr3:50644533-50645709:+	MAPKAPK3	bimodal
isoform1=junction:chr3:52706704-52707686:+|isoform2=junction:chr3:52706704-52706792:+@exon:chr3:52706793-52706879:+@junction:chr3:52706880-52707686:+	SPCS1	included
isoform1=junction:chr3:87227557-87245713:+|isoform2=junction:chr3:87227557-87240698:+@exon:chr3:87240699-87240790:+@junction:chr3:87240791-87245713:+	CHMP2B	included
isoform1=junction:chr3:98822742-98849460:-|isoform2=junction:chr3:98825367-98849460:-@exon:chr3:98825315-98825366:-@junction:chr3:98822742-98825314:-	DCBLD2	multimodal
isoform1=junction:chr4:102802639-102809671:-|isoform2=junction:chr4:102809160-102809671:-@exon:chr4:102809068-102809159:-@junction:chr4:102802639-102809067:-	UBE2D3	excluded
isoform1=junction:chr4:105424323-105446382:-|isoform2=junction:chr4:105438037-105446382:-@exon:chr4:105437950-105438036:-@junction:chr4:105424323-105437949:-	PPA2	included
isoform1=junction:chr4:108655658-108667246:+|isoform2=junction:chr4:108655658-108657449:+@exon:chr4:108657450-108657647:+@junction:chr4:108657648-108667246:+	OSTC	included
isoform1=junction:chr4:121670013-121671546:-|isoform2=junction:chr4:121670223-121671546:-@novel_exon:chr4:121670174-121670222:-@junction:chr4:121670013-121670173:-	ANXA5	excluded
isoform1=junction:chr4:139666078-139695196:+|isoform2=junction:chr4:139666078-139678542:+@exon:chr4:139678543-139678642:+@junction:chr4:139678643-139695196:+	MGST2	bimodal
isoform1=junction:chr4:139678643-139703454:+|isoform2=junction:chr4:139678643-139695196:+@exon:chr4:139695197-139695267:+@junction:chr4:139695268-139703454:+	MGST2	bimodal
isoform1=junction:chr4:169002206-169006754:-|isoform2=junction:chr4:169005915-169006754:-@exon:chr4:169005885-169005914:-@junction:chr4:169002206-169005884:-	CBR4	multimodal
isoform1=junction:chr4:1700071-1711873:-|isoform2=junction:chr4:1703701-1711873:-@exon:chr4:1703596-1703700:-@junction:chr4:1700071-1703595:-	SLBP	included
isoform1=junction:chr4:2823038-2824612:+|isoform2=junction:chr4:2823038-2823394:+@exon:chr4:2823395-2823569:+@junction:chr4:2823570-2824612:+	SH3BP2	excluded
isoform1=junction:chr4:39552159-39572414:-|isoform2=junction:chr4:39556571-39572414:-@exon:chr4:39556428-39556570:-@junction:chr4:39552159-39556427:-	SMIM14	included
isoform1=junction:chr4:41619441-41644499:+|isoform2=junction:chr4:41619441-41638931:+@exon:chr4:41638932-41638967:+@junction:chr4:41638968-41644499:+	LIMCH1	bimodal
isoform1=junction:chr4:48851976-48860724:+|isoform2=junction:chr4:48851976-48857212:+@exon:chr4:48857213-48857365:+@junction:chr4:48857366-48860724:+	OCIAD1	included
isoform1=junction:chr4:48885566-48894005:-|isoform2=junction:chr4:48892890-48894005:-@exon:chr4:48892772-48892889:-@junction:chr4:48885566-48892771:-	OCIAD2	included
isoform1=junction:chr4:48894054-48897803:-|isoform2=junction:chr4:48897225-48897803:-@novel_exon:chr4:48897154-48897224:-@junction:chr4:48894054-48897153:-	OCIAD2	excluded
isoform1=junction:chr4:48897858-48904483:-|isoform2=junction:chr4:48899926-48904483:-@exon:chr4:48899829-48899925:-@junction:chr4:48897858-48899828:-	OCIAD2	included
isoform1=junction:chr4:55364272-55369831:+|isoform2=junction:chr4:55364272-55367587:+@exon:chr4:55367588-55367722:+@junction:chr4:55367723-55369831:+	SRD5A3	included
isoform1=junction:chr4:56919871-56929840:+|isoform2=junction:chr4:56919871-56927614:+@exon:chr4:56927615-56927664:+@junction:chr4:56927665-56929840:+	REST	excluded
isoform1=junction:chr4:77048663-77055961:-|isoform2=junction:chr4:77055381-77055961:-@exon:chr4:77055150-77055380:-@junction:chr4:77048663-77055149:-	CCNI	included
isoform1=junction:chr4:82424884-82426036:-|isoform2=junction:chr4:82425668-82426036:-@exon:chr4:82425563-82425667:-@junction:chr4:82424884-82425562:-	HNRNPDL	bimodal
isoform1=junction:chr4:82426130-82427189:-|isoform2=junction:chr4:82426634-82427189:-@exon:chr4:82426463-82426633:-@junction:chr4:82426130-82426462:-	HNRNPDL	included
isoform1=junction:chr4:83456959-83459739:+|isoform2=junction:chr4:83456959-83458345:+@exon:chr4:83458346-83458429:+@junction:chr4:83458430-83459739:+	MRPS18C	included
isoform1=junction:chr4:83456959-83460972:+|isoform2=junction:chr4:83456959-83459739:+@exon:chr4:83459740-83459797:+@junction:chr4:83459798-83460972:+	MRPS18C	included
isoform1=junction:chr4:83458430-83460972:+|isoform2=junction:chr4:83458430-83459739:+@exon:chr4:83459740-83459797:+@junction:chr4:83459798-83460972:+	MRPS18C	included
isoform1=junction:chr4:94455385-94573350:+|isoform2=junction:chr4:94455385-94523723:+@exon:chr4:94523724-94523875:+@junction:chr4:94523876-94573350:+	PDLIM5	included
isoform1=junction:chr4:94576035-94585564:+|isoform2=junction:chr4:94576035-94584985:+@exon:chr4:94584986-94585003:+@junction:chr4:94585004-94585564:+	PDLIM5	excluded
isoform1=junction:chr4:98379164-98391951:+|isoform2=junction:chr4:98379164-98387435:+@exon:chr4:98387436-98387507:+@junction:chr4:98387508-98391951:+	RAP1GDS1	excluded
isoform1=junction:chr5:100562189-100586180:+|isoform2=junction:chr5:100562189-100581346:+@exon:chr5:100581347-100581404:+@junction:chr5:100581405-100586180:+	FAM174A	bimodal
isoform1=junction:chr5:10254206-10255954:+|isoform2=junction:chr5:10254206-10254673:+@exon:chr5:10254674-10254838:+@junction:chr5:10254839-10255954:+	CCT5	included
isoform1=junction:chr5:119456369-119473907:+|isoform2=junction:chr5:119456369-119471635:+@exon:chr5:119471636-119471700:+@junction:chr5:119471701-119473907:+	HSD17B4	excluded
isoform1=junction:chr5:131159612-131165094:-|isoform2=junction:chr5:131162677-131165094:-@exon:chr5:131162572-131162676:-@junction:chr5:131159612-131162571:-	HINT1	included
isoform1=junction:chr5:132485717-132486556:-|isoform2=junction:chr5:132486374-132486556:-@exon:chr5:132486251-132486373:-@junction:chr5:132485717-132486250:-	IRF1	included
isoform1=junction:chr5:132866688-132867487:+|isoform2=junction:chr5:132866688-132866868:+@exon:chr5:132866869-132867035:+@junction:chr5:132867036-132867487:+	UQCRQ	included
isoform1=junction:chr5:132897241-132899103:-|isoform2=junction:chr5:132898393-132899103:-@exon:chr5:132898230-132898392:-@junction:chr5:132897241-132898229:-	AFF4	bimodal
isoform1=junction:chr5:132902488-132927120:-|isoform2=junction:chr5:132904405-132927120:-@exon:chr5:132904368-132904404:-@junction:chr5:132902488-132904367:-	AFF4	included
isoform1=junction:chr5:134199205-134200984:-|isoform2=junction:chr5:134200497-134200984:-@exon:chr5:134200335-134200496:-@junction:chr5:134199205-134200334:-	PPP2CA	included
isoform1=junction:chr5:134376695-134388324:+|isoform2=junction:chr5:134376695-134380718:+@exon:chr5:134380719-134380808:+@junction:chr5:134380809-134388324:+	UBE2B	included
isoform1=junction:chr5:134738793-134743986:+|isoform2=junction:chr5:134738793-134741062:+@exon:chr5:134741063-134741523:+@junction:chr5:134741524-134743986:+	CAMLG	multimodal
isoform1=junction:chr5:135350914-135360496:-@exon:chr5:135350823-135350913:-@junction:chr5:135346058-135350822:-|isoform2=junction:chr5:135353046-135360496:-@exon:chr5:135352946-135353045:-@junction:chr5:135346058-135352945:-	H2AFY	bimodal
isoform1=junction:chr5:135350914-135360496:-@novel_exon:chr5:135350827-135350913:-@junction:chr5:135346058-135350826:-|isoform2=junction:chr5:135353046-135360496:-@exon:chr5:135352946-135353045:-@junction:chr5:135346058-135352945:-	H2AFY	included
isoform1=junction:chr5:138561790-138567000:-|isoform2=junction:chr5:138566719-138567000:-@exon:chr5:138566626-138566718:-@junction:chr5:138561790-138566625:-	HSPA9	included
isoform1=junction:chr5:138573851-138575237:-|isoform2=junction:chr5:138574127-138575237:-@exon:chr5:138574068-138574126:-@junction:chr5:138573851-138574067:-	HSPA9	included
isoform1=junction:chr5:138782030-138810037:+|isoform2=junction:chr5:138782030-138783176:+@exon:chr5:138783177-138783372:+@junction:chr5:138783373-138810037:+	CTNNA1	included
isoform1=junction:chr5:140281534-140303040:-|isoform2=junction:chr5:140300583-140303040:-@exon:chr5:140300416-140300582:-@junction:chr5:140281534-140300415:-	PFDN1	included
isoform1=junction:chr5:142135818-142140562:+|isoform2=junction:chr5:142135818-142137733:+@exon:chr5:142137734-142137858:+@junction:chr5:142137859-142140562:+	NDFIP1	included
isoform1=junction:chr5:146459338-146463550:+|isoform2=junction:chr5:146459338-146462017:+@exon:chr5:146462018-146462096:+@junction:chr5:146462097-146463550:+	TCERG1	bimodal
isoform1=junction:chr5:150402626-150404679:-|isoform2=junction:chr5:150403313-150404679:-@exon:chr5:150403121-150403312:-@junction:chr5:150402626-150403120:-	CD74	multimodal
isoform1=junction:chr5:150406322-150407151:-|isoform2=junction:chr5:150406961-150407151:-@exon:chr5:150406881-150406960:-@junction:chr5:150406322-150406880:-	CD74	included
isoform1=junction:chr5:151742960-151751703:-|isoform2=junction:chr5:151746450-151751703:-@exon:chr5:151746279-151746449:-@junction:chr5:151742960-151746278:-	ATOX1	included
isoform1=junction:chr5:154941266-154956370:+|isoform2=junction:chr5:154941266-154950820:+@exon:chr5:154950821-154950938:+@junction:chr5:154950939-154956370:+	MRPL22	included
isoform1=junction:chr5:163457081-163459861:-|isoform2=junction:chr5:163457611-163459861:-@exon:chr5:163457562-163457610:-@junction:chr5:163457081-163457561:-	NUDCD2	included
isoform1=junction:chr5:168492848-168494549:+|isoform2=junction:chr5:168492848-168493893:+@exon:chr5:168493894-168494002:+@junction:chr5:168494003-168494549:+	RARS	included
isoform1=junction:chr5:171388007-171391304:+|isoform2=junction:chr5:171388007-171390050:+@exon:chr5:171390051-171390130:+@junction:chr5:171390131-171391304:+	NPM1	included
isoform1=junction:chr5:172769133-172770160:-|isoform2=junction:chr5:172769795-172770160:-@exon:chr5:172769575-172769794:-@junction:chr5:172769133-172769574:-	DUSP1	included
isoform1=junction:chr5:172769795-172770585:-|isoform2=junction:chr5:172770307-172770585:-@exon:chr5:172770161-172770306:-@junction:chr5:172769795-172770160:-	DUSP1	included
isoform1=junction:chr5:179614960-179616125:-|isoform2=junction:chr5:179615596-179616125:-@exon:chr5:179615546-179615595:-@junction:chr5:179614960-179615545:-	HNRNPH1	included
isoform1=junction:chr5:179618324-179620891:-|isoform2=junction:chr5:179619408-179620891:-@exon:chr5:179619269-179619407:-@junction:chr5:179618324-179619268:-	HNRNPH1	multimodal
isoform1=junction:chr5:181238240-181239486:-|isoform2=junction:chr5:181239178-181239486:-@exon:chr5:181239067-181239177:-@junction:chr5:181238240-181239066:-	RACK1	included
isoform1=junction:chr5:304222-311292:+|isoform2=junction:chr5:304222-306601:+@exon:chr5:306602-306754:+@junction:chr5:306755-311292:+	PDCD6	included
isoform1=junction:chr5:304222-311292:+|isoform2=junction:chr5:304222-306601:+@exon:chr5:306602-306760:+@junction:chr5:306761-311292:+	PDCD6	included
isoform1=junction:chr5:32135687-32173809:-|isoform2=junction:chr5:32143881-32173809:-@exon:chr5:32143749-32143880:-@junction:chr5:32135687-32143748:-	GOLPH3	included
isoform1=junction:chr5:33445405-33453288:+|isoform2=junction:chr5:33445405-33448540:+@exon:chr5:33448541-33448731:+@junction:chr5:33448732-33453288:+	TARS	included
isoform1=junction:chr5:43297167-43298517:-|isoform2=junction:chr5:43298135-43298517:-@exon:chr5:43298009-43298134:-@junction:chr5:43297167-43298008:-	HMGCS1	included
isoform1=junction:chr5:53100535-53102096:-|isoform2=junction:chr5:53101510-53102096:-@exon:chr5:53101359-53101509:-@junction:chr5:53100535-53101358:-	MOCS2	bimodal
isoform1=junction:chr5:53603531-53658550:+|isoform2=junction:chr5:53603531-53646232:+@exon:chr5:53646233-53646405:+@junction:chr5:53646406-53658550:+	NDUFS4	included
isoform1=junction:chr5:57214194-57230845:+|isoform2=junction:chr5:57214194-57221375:+@exon:chr5:57221376-57221396:+@junction:chr5:57221397-57230845:+	GPBP1	bimodal
isoform1=junction:chr5:69171453-69174876:+|isoform2=junction:chr5:69171453-69174250:+@exon:chr5:69174251-69174409:+@junction:chr5:69174410-69174876:+	CCNB1	included
isoform1=junction:chr5:69420532-69432526:+|isoform2=junction:chr5:69420532-69424600:+@exon:chr5:69424601-69424636:+@junction:chr5:69424637-69432526:+	MARVELD2	multimodal
isoform1=junction:chr5:96727531-96729611:+|isoform2=junction:chr5:96727531-96729152:+@exon:chr5:96729153-96729209:+@junction:chr5:96729210-96729611:+	CAST	included
isoform1=junction:chr5:96740119-96741265:+|isoform2=junction:chr5:96740119-96740744:+@exon:chr5:96740745-96740783:+@junction:chr5:96740784-96741265:+	CAST	bimodal
isoform1=junction:chr6:104811394-104843222:-|isoform2=junction:chr6:104833174-104843222:-@exon:chr6:104833042-104833173:-@junction:chr6:104811394-104833041:-	HACE1	included
isoform1=junction:chr6:105282583-105288757:-|isoform2=junction:chr6:105285581-105288757:-@exon:chr6:105285486-105285580:-@junction:chr6:105282583-105285485:-	PREP	included
isoform1=junction:chr6:106202090-106279660:-|isoform2=junction:chr6:106248245-106279660:-@exon:chr6:106248150-106248244:-@junction:chr6:106202090-106248149:-	ATG5	included
isoform1=junction:chr6:106293107-106316100:-|isoform2=junction:chr6:106308492-106316100:-@exon:chr6:106308364-106308491:-@junction:chr6:106293107-106308363:-	ATG5	multimodal
isoform1=junction:chr6:106629706-106640348:+|isoform2=junction:chr6:106629706-106640100:+@exon:chr6:106640101-106640206:+@junction:chr6:106640207-106640348:+	QRSL1	excluded
isoform1=junction:chr6:10723242-10724960:+|isoform2=junction:chr6:10723242-10724569:+@exon:chr6:10724570-10724633:+@junction:chr6:10724634-10724960:+	TMEM14C	included
isoform1=junction:chr6:107274228-107458989:-|isoform2=junction:chr6:107334333-107458989:-@exon:chr6:107334198-107334332:-@junction:chr6:107274228-107334197:-	PDSS2	included
isoform1=junction:chr6:10749699-10755141:+|isoform2=junction:chr6:10749699-10751132:+@exon:chr6:10751133-10751234:+@junction:chr6:10751235-10755141:+	TMEM14B	included
isoform1=junction:chr6:10751235-10756466:+|isoform2=junction:chr6:10751235-10755141:+@exon:chr6:10755142-10755232:+@junction:chr6:10755233-10756466:+	TMEM14B	included
isoform1=junction:chr6:109369018-109376073:-|isoform2=junction:chr6:109370468-109376073:-@exon:chr6:109370411-109370467:-@junction:chr6:109369018-109370410:-	CD164	bimodal
isoform1=junction:chr6:116681339-116689319:+|isoform2=junction:chr6:116681339-116681446:+@exon:chr6:116681447-116681552:+@junction:chr6:116681553-116689319:+	KPNA5	multimodal
isoform1=junction:chr6:116681339-116689319:+|isoform2=junction:chr6:116681339-116681492:+@novel_exon:chr6:116681493-116681552:+@junction:chr6:116681553-116689319:+	KPNA5	multimodal
isoform1=junction:chr6:116689454-116692292:+|isoform2=junction:chr6:116689454-116692054:+@exon:chr6:116692055-116692156:+@junction:chr6:116692157-116692292:+	KPNA5	included
isoform1=junction:chr6:116702151-116716218:+|isoform2=junction:chr6:116702151-116705071:+@exon:chr6:116705072-116705160:+@junction:chr6:116705161-116716218:+	KPNA5	included
isoform1=junction:chr6:116722290-116725750:+|isoform2=junction:chr6:116722290-116724296:+@exon:chr6:116724297-116724375:+@junction:chr6:116724376-116725750:+	KPNA5	included
isoform1=junction:chr6:125292910-125300537:-|isoform2=junction:chr6:125298817-125300537:-@exon:chr6:125298714-125298816:-@junction:chr6:125292910-125298713:-	HDDC2	bimodal
isoform1=junction:chr6:125927759-125928635:+|isoform2=junction:chr6:125927759-125928173:+@exon:chr6:125928174-125928247:+@junction:chr6:125928248-125928635:+	NCOA7	included
isoform1=junction:chr6:128397689-128520258:-|isoform2=junction:chr6:128409333-128520258:-@exon:chr6:128409294-128409332:-@junction:chr6:128397689-128409293:-	PTPRK	excluded
isoform1=junction:chr6:131610247-131618406:-|isoform2=junction:chr6:131616003-131618406:-@exon:chr6:131615907-131616002:-@junction:chr6:131610247-131615906:-	MED23	multimodal
isoform1=junction:chr6:131619897-131621880:-|isoform2=junction:chr6:131620730-131621880:-@exon:chr6:131620628-131620729:-@junction:chr6:131619897-131620627:-	MED23	included
isoform1=junction:chr6:132814783-132816460:+|isoform2=junction:chr6:132814783-132814971:+@exon:chr6:132814972-132815088:+@junction:chr6:132815089-132816460:+	RPS12	included
isoform1=junction:chr6:135039768-135050581:-|isoform2=junction:chr6:135042127-135050581:-@exon:chr6:135042001-135042126:-@junction:chr6:135039768-135042000:-	HBS1L	bimodal
isoform1=junction:chr6:149572345-149578821:+|isoform2=junction:chr6:149572345-149572506:+@exon:chr6:149572507-149572603:+@junction:chr6:149572604-149578821:+	GINM1	included
isoform1=junction:chr6:159685034-159692660:-|isoform2=junction:chr6:159688243-159692660:-@exon:chr6:159688126-159688242:-@junction:chr6:159685034-159688125:-	SOD2	included
isoform1=junction:chr6:2115881-2124686:-|isoform2=junction:chr6:2117557-2124686:-@exon:chr6:2117469-2117556:-@junction:chr6:2115881-2117468:-	GMDS	included
isoform1=junction:chr6:24784170-24785637:+|isoform2=junction:chr6:24784170-24784443:+@exon:chr6:24784444-24784554:+@junction:chr6:24784555-24785637:+	GMNN	included
isoform1=junction:chr6:30061670-30062223:+|isoform2=junction:chr6:30061670-30061916:+@exon:chr6:30061917-30062017:+@junction:chr6:30062018-30062223:+	ZNRD1	included
isoform1=junction:chr6:30741334-30741791:-|isoform2=junction:chr6:30741705-30741791:-@exon:chr6:30741614-30741704:-@junction:chr6:30741334-30741613:-	FLOT1	included
isoform1=junction:chr6:311963-345853:+|isoform2=junction:chr6:311963-335113:+@exon:chr6:335114-335163:+@junction:chr6:335164-345853:+	DUSP22	multimodal
isoform1=junction:chr6:32974766-32975383:+|isoform2=junction:chr6:32974766-32975020:+@exon:chr6:32975021-32975112:+@junction:chr6:32975113-32975383:+	BRD2	excluded
isoform1=junction:chr6:34247150-34247680:-|isoform2=junction:chr6:34247493-34247680:-@exon:chr6:34247467-34247492:-@junction:chr6:34247150-34247466:-	SMIM29	included
isoform1=junction:chr6:34757552-34762594:+|isoform2=junction:chr6:34757552-34757911:+@exon:chr6:34757912-34757954:+@junction:chr6:34757955-34762594:+	SNRPC	included
isoform1=junction:chr6:36479224-36481561:+|isoform2=junction:chr6:36479224-36479590:+@exon:chr6:36479591-36479711:+@junction:chr6:36479712-36481561:+	KCTD20	included
isoform1=junction:chr6:36598984-36601151:+|isoform2=junction:chr6:36598984-36599820:+@exon:chr6:36599821-36600276:+@junction:chr6:36600277-36601151:+	SRSF3	bimodal
isoform1=junction:chr6:41937395-41941451:-|isoform2=junction:chr6:41940586-41941451:-@exon:chr6:41940370-41940585:-@junction:chr6:41937395-41940369:-	CCND3	bimodal
isoform1=junction:chr6:41940586-41941451:-|isoform2=junction:chr6:41941162-41941451:-@exon:chr6:41940952-41941161:-@junction:chr6:41940586-41940951:-	CCND3	excluded
isoform1=junction:chr6:42211918-42214279:-|isoform2=junction:chr6:42214193-42214279:-@exon:chr6:42214120-42214192:-@junction:chr6:42211918-42214119:-	MRPS10	included
isoform1=junction:chr6:42934599-42935573:+|isoform2=junction:chr6:42934599-42935411:+@novel_exon:chr6:42935412-42935473:+@junction:chr6:42935474-42935573:+	CNPY3	excluded
isoform1=junction:chr6:44247196-44249376:+|isoform2=junction:chr6:44247196-44248629:+@exon:chr6:44248630-44248776:+@junction:chr6:44248777-44249376:+	HSP90AB1	included
isoform1=junction:chr6:75237989-75241175:-|isoform2=junction:chr6:75240386-75241175:-@exon:chr6:75240301-75240385:-@junction:chr6:75237989-75240300:-	COX7A2	included
isoform1=junction:chr6:85677493-85678135:-|isoform2=junction:chr6:85678033-85678135:-@exon:chr6:85677795-85678032:-@junction:chr6:85677493-85677794:-	SNHG5	included
isoform1=junction:chr7:100090655-100091037:+|isoform2=junction:chr7:100090655-100090901:+@exon:chr7:100090902-100090949:+@junction:chr7:100090950-100091037:+	COPS6	included
isoform1=junction:chr7:101318214-101321670:-|isoform2=junction:chr7:101319033-101321670:-@exon:chr7:101318956-101319032:-@junction:chr7:101318214-101318955:-	IFT22	bimodal
isoform1=junction:chr7:103304491-103308951:+|isoform2=junction:chr7:103304491-103307595:+@exon:chr7:103307596-103307708:+@junction:chr7:103307709-103308951:+	PMPCB	multimodal
isoform1=junction:chr7:105014536-105040838:+|isoform2=junction:chr7:105014536-105038125:+@exon:chr7:105038126-105038199:+@junction:chr7:105038200-105040838:+	KMT2E	multimodal
isoform1=junction:chr7:112462180-112467980:+|isoform2=junction:chr7:112462180-112462269:+@exon:chr7:112462270-112462378:+@junction:chr7:112462379-112467980:+	IFRD1	included
isoform1=junction:chr7:116250497-116252317:+|isoform2=junction:chr7:116250497-116251759:+@exon:chr7:116251760-116251975:+@junction:chr7:116251976-116252317:+	TES	included
isoform1=junction:chr7:12230439-12231836:+|isoform2=junction:chr7:12230439-12231061:+@exon:chr7:12231062-12231115:+@junction:chr7:12231116-12231836:+	TMEM106B	included
isoform1=junction:chr7:128863063-128865376:+|isoform2=junction:chr7:128863063-128865119:+@exon:chr7:128865120-128865203:+@junction:chr7:128865204-128865376:+	ATP6V1F	excluded
isoform1=junction:chr7:140696843-140702865:+|isoform2=junction:chr7:140696843-140700869:+@exon:chr7:140700870-140700959:+@junction:chr7:140700960-140702865:+	NDUFB2	excluded
isoform1=junction:chr7:141739191-141742168:+|isoform2=junction:chr7:141739191-141741748:+@exon:chr7:141741749-141741792:+@junction:chr7:141741793-141742168:+	SSBP1	excluded
isoform1=junction:chr7:1548689-1549853:-|isoform2=junction:chr7:1549605-1549853:-@exon:chr7:1549547-1549604:-@junction:chr7:1548689-1549546:-	TMEM184A	excluded
isoform1=junction:chr7:16795020-16799743:-|isoform2=junction:chr7:16797695-16799743:-@exon:chr7:16797631-16797694:-@junction:chr7:16795020-16797630:-	AGR2	included
isoform1=junction:chr7:16859632-16861383:-|isoform2=junction:chr7:16860584-16861383:-@exon:chr7:16860500-16860583:-@junction:chr7:16859632-16860499:-	AGR3	included
isoform1=junction:chr7:16873844-16880723:-|isoform2=junction:chr7:16878646-16880723:-@exon:chr7:16878510-16878645:-@junction:chr7:16873844-16878509:-	AGR3	included
isoform1=junction:chr7:16873844-16881943:-|isoform2=junction:chr7:16878646-16881943:-@exon:chr7:16878510-16878645:-@junction:chr7:16873844-16878509:-	AGR3	included
isoform1=junction:chr7:16878646-16881943:-@exon:chr7:16878510-16878645:-@junction:chr7:16873844-16878509:-|isoform2=junction:chr7:16880756-16881943:-@novel_exon:chr7:16880724-16880755:-@junction:chr7:16873844-16880723:-	AGR3	excluded
isoform1=junction:chr7:16878646-16881943:-|isoform2=junction:chr7:16880756-16881943:-@novel_exon:chr7:16880724-16880755:-@junction:chr7:16878646-16880723:-	AGR3	excluded
isoform1=junction:chr7:22813186-22822676:-|isoform2=junction:chr7:22818049-22822676:-@exon:chr7:22818000-22818048:-@junction:chr7:22813186-22817999:-	TOMM7	included
isoform1=junction:chr7:26190461-26192494:-|isoform2=junction:chr7:26191129-26192494:-@exon:chr7:26190993-26191128:-@junction:chr7:26190461-26190992:-	HNRNPA2B1	multimodal
isoform1=junction:chr7:26193374-26195846:-|isoform2=junction:chr7:26193695-26195846:-@exon:chr7:26193575-26193694:-@junction:chr7:26193374-26193574:-	HNRNPA2B1	included
isoform1=junction:chr7:26197733-26200571:-|isoform2=junction:chr7:26197867-26200571:-@exon:chr7:26197831-26197866:-@junction:chr7:26197733-26197830:-	HNRNPA2B1	excluded
isoform1=junction:chr7:30022817-30026311:-|isoform2=junction:chr7:30023036-30026311:-@novel_exon:chr7:30022963-30023035:-@junction:chr7:30022817-30022962:-	FKBP14	bimodal
isoform1=junction:chr7:30498939-30504568:-|isoform2=junction:chr7:30500682-30504568:-@exon:chr7:30500536-30500681:-@junction:chr7:30498939-30500535:-	GGCT	included
isoform1=junction:chr7:35801271-35832797:+|isoform2=junction:chr7:35801271-35831491:+@exon:chr7:35831492-35831496:+@junction:chr7:35831497-35832797:+	SEPT7	included
isoform1=junction:chr7:35801271-35832797:+|isoform2=junction:chr7:35801271-35831494:+@exon:chr7:35831495-35831496:+@junction:chr7:35831497-35832797:+	SEPT7	multimodal
isoform1=junction:chr7:38215106-38217187:+|isoform2=junction:chr7:38215106-38217024:+@exon:chr7:38217025-38217078:+@junction:chr7:38217079-38217187:+	STARD3NL	included
isoform1=junction:chr7:42935137-42937321:+|isoform2=junction:chr7:42935137-42937147:+@novel_exon:chr7:42937148-42937241:+@junction:chr7:42937242-42937321:+	MRPL32	excluded
isoform1=junction:chr7:42935137-42937321:+|isoform2=junction:chr7:42935137-42937163:+@exon:chr7:42937164-42937241:+@junction:chr7:42937242-42937321:+	MRPL32	excluded
isoform1=junction:chr7:43938495-43942953:+|isoform2=junction:chr7:43938495-43942825:+@exon:chr7:43942826-43942857:+@junction:chr7:43942858-43942953:+	UBE2D4	bimodal
isoform1=junction:chr7:44579629-44581448:-|isoform2=junction:chr7:44581240-44581448:-@exon:chr7:44581093-44581239:-@junction:chr7:44579629-44581092:-	TMED4	included
isoform1=junction:chr7:44796794-44799246:+|isoform2=junction:chr7:44796794-44798747:+@exon:chr7:44798748-44798814:+@junction:chr7:44798815-44799246:+	PPIA	excluded
isoform1=junction:chr7:44796794-44799246:+|isoform2=junction:chr7:44796794-44798747:+@exon:chr7:44798748-44798904:+@junction:chr7:44798905-44799246:+	PPIA	excluded
isoform1=junction:chr7:44799481-44801286:+|isoform2=junction:chr7:44799481-44799701:+@exon:chr7:44799702-44799874:+@junction:chr7:44799875-44801286:+	PPIA	included
isoform1=junction:chr7:44834563-44840898:-|isoform2=junction:chr7:44835659-44840898:-@exon:chr7:44835529-44835658:-@junction:chr7:44834563-44835528:-	H2AFV	included
isoform1=junction:chr7:56051986-56054368:+|isoform2=junction:chr7:56051986-56052421:+@exon:chr7:56052422-56052485:+@junction:chr7:56052486-56054368:+	CCT6A	included
isoform1=junction:chr7:56060941-56062682:+|isoform2=junction:chr7:56060941-56061746:+@exon:chr7:56061747-56061849:+@junction:chr7:56061850-56062682:+	CCT6A	included
isoform1=junction:chr7:6392042-6400125:+|isoform2=junction:chr7:6392042-6398661:+@exon:chr7:6398662-6398718:+@junction:chr7:6398719-6400125:+	RAC1	bimodal
isoform1=junction:chr7:6400189-6402315:+|isoform2=junction:chr7:6400189-6401867:+@exon:chr7:6401868-6402027:+@junction:chr7:6402028-6402315:+	RAC1	included
isoform1=junction:chr7:65974705-65976014:-|isoform2=junction:chr7:65975072-65976014:-@exon:chr7:65974919-65975071:-@junction:chr7:65974705-65974918:-	GUSB	multimodal
isoform1=junction:chr7:66086663-66087333:+|isoform2=junction:chr7:66086663-66086743:+@exon:chr7:66086744-66086821:+@junction:chr7:66086822-66087333:+	ASL	included
isoform1=junction:chr7:73694051-73697604:+|isoform2=junction:chr7:73694051-73697465:+@exon:chr7:73697466-73697516:+@junction:chr7:73697517-73697604:+	BUD23	excluded
isoform1=junction:chr7:73737111-73737561:-|isoform2=junction:chr7:73737392-73737561:-@exon:chr7:73737221-73737391:-@junction:chr7:73737111-73737220:-	ABHD11	included
isoform1=junction:chr7:73737736-73738327:-|isoform2=junction:chr7:73738143-73738327:-@exon:chr7:73737876-73738142:-@junction:chr7:73737736-73737875:-	ABHD11	excluded
isoform1=junction:chr7:74243247-74249011:-|isoform2=junction:chr7:74246764-74249011:-@exon:chr7:74246662-74246763:-@junction:chr7:74243247-74246661:-	RFC2	included
isoform1=junction:chr7:74716951-74728785:+|isoform2=junction:chr7:74716951-74718878:+@exon:chr7:74718879-74718941:+@junction:chr7:74718942-74728785:+	GTF2I	multimodal
isoform1=junction:chr7:91980334-91992884:+|isoform2=junction:chr7:91980334-91992157:+@exon:chr7:91992158-91992211:+@junction:chr7:91992212-91992884:+	AKAP9	bimodal
isoform1=junction:chr7:99458356-99460085:-|isoform2=junction:chr7:99459264-99460085:-@exon:chr7:99459147-99459263:-@junction:chr7:99458356-99459146:-	ATP5J2	included
isoform1=junction:chr7:99560696-99563862:+|isoform2=junction:chr7:99560696-99561887:+@exon:chr7:99561888-99562494:+@junction:chr7:99562495-99563862:+	ZNF655	included
isoform1=junction:chr7:99666690-99666951:-@exon:chr7:99666601-99666689:-@junction:chr7:99665315-99666600:-|isoform2=junction:chr7:99666811-99666951:-@exon:chr7:99666713-99666810:-@junction:chr7:99665315-99666712:-	CYP3A5	multimodal
isoform1=junction:chr7:99967287-99971745:-|isoform2=junction:chr7:99968431-99971745:-@exon:chr7:99968155-99968430:-@junction:chr7:99967287-99968154:-	AZGP1	included
isoform1=junction:chr8:100925040-100951928:-|isoform2=junction:chr8:100948901-100951928:-@exon:chr8:100948596-100948900:-@junction:chr8:100925040-100948595:-	YWHAZ	included
isoform1=junction:chr8:102843748-102858012:-|isoform2=junction:chr8:102850145-102858012:-@exon:chr8:102849999-102850144:-@junction:chr8:102843748-102849998:-	AZIN1	bimodal
isoform1=junction:chr8:102843748-102858012:-|isoform2=junction:chr8:102850166-102858012:-@exon:chr8:102849999-102850165:-@junction:chr8:102843748-102849998:-	AZIN1	excluded
isoform1=junction:chr8:116658981-116755665:-|isoform2=junction:chr8:116726173-116755665:-@exon:chr8:116726016-116726172:-@junction:chr8:116658981-116726015:-	EIF3H	included
isoform1=junction:chr8:120425367-120443184:-|isoform2=junction:chr8:120432124-120443184:-@exon:chr8:120432030-120432123:-@junction:chr8:120425367-120432029:-	MRPL13	included
isoform1=junction:chr8:120432124-120445067:-|isoform2=junction:chr8:120443309-120445067:-@exon:chr8:120443185-120443308:-@junction:chr8:120432124-120443184:-	MRPL13	included
isoform1=junction:chr8:123430034-123436452:+|isoform2=junction:chr8:123430034-123435441:+@exon:chr8:123435442-123435542:+@junction:chr8:123435543-123436452:+	WDYHV1	excluded
isoform1=junction:chr8:129871497-129903311:-|isoform2=junction:chr8:129879472-129903311:-@exon:chr8:129879389-129879471:-@junction:chr8:129871497-129879388:-	FAM49B	multimodal
isoform1=junction:chr8:143581329-143586728:-|isoform2=junction:chr8:143586291-143586728:-@exon:chr8:143586219-143586290:-@junction:chr8:143581329-143586218:-	EEF1D	included
isoform1=junction:chr8:143818535-143821596:-|isoform2=junction:chr8:143820717-143821596:-@exon:chr8:143820666-143820716:-@junction:chr8:143818535-143820665:-	PUF60	multimodal
isoform1=junction:chr8:144423923-144424214:-|isoform2=junction:chr8:144424133-144424214:-@exon:chr8:144424041-144424132:-@junction:chr8:144423923-144424040:-	VPS28	included
isoform1=junction:chr8:144790471-144791276:-|isoform2=junction:chr8:144790764-144791276:-@exon:chr8:144790678-144790763:-@junction:chr8:144790471-144790677:-	RPL8	excluded
isoform1=junction:chr8:27748280-27752511:-|isoform2=junction:chr8:27748599-27752511:-@exon:chr8:27748495-27748598:-@junction:chr8:27748280-27748494:-	CCDC25	multimodal
isoform1=junction:chr8:27752588-27762418:-|isoform2=junction:chr8:27756771-27762418:-@exon:chr8:27756719-27756770:-@junction:chr8:27752588-27756718:-	CCDC25	included
isoform1=junction:chr8:30070060-30082846:-|isoform2=junction:chr8:30074056-30082846:-@exon:chr8:30073877-30074055:-@junction:chr8:30070060-30073876:-	SARAF	included
isoform1=junction:chr8:38267961-38268881:-|isoform2=junction:chr8:38268462-38268881:-@exon:chr8:38268371-38268461:-@junction:chr8:38267961-38268370:-	PLPP5	multimodal
isoform1=junction:chr8:39055773-39077227:+|isoform2=junction:chr8:39055773-39071297:+@exon:chr8:39071298-39071403:+@junction:chr8:39071404-39077227:+	ADAM9	included
isoform1=junction:chr8:39082722-39090046:+|isoform2=junction:chr8:39082722-39082967:+@exon:chr8:39082968-39083073:+@junction:chr8:39083074-39090046:+	ADAM9	included
isoform1=junction:chr8:42395134-42398711:+|isoform2=junction:chr8:42395134-42396677:+@exon:chr8:42396678-42396680:+@junction:chr8:42396681-42398711:+	VDAC3	excluded
isoform1=junction:chr8:56309028-56316014:-|isoform2=junction:chr8:56312289-56316014:-@exon:chr8:56312157-56312288:-@junction:chr8:56309028-56312156:-	SDR16C5	included
isoform1=junction:chr8:60558924-60584207:+|isoform2=junction:chr8:60558924-60572045:+@exon:chr8:60572046-60572113:+@junction:chr8:60572114-60584207:+	RAB2A	included
isoform1=junction:chr8:61643434-61644599:-|isoform2=junction:chr8:61644002-61644599:-@exon:chr8:61643945-61644001:-@junction:chr8:61643434-61643944:-	ASPH	included
isoform1=junction:chr8:61644633-61651049:-|isoform2=junction:chr8:61646879-61651049:-@exon:chr8:61646750-61646878:-@junction:chr8:61644633-61646749:-	ASPH	multimodal
isoform1=junction:chr8:66922393-66925436:-|isoform2=junction:chr8:66922726-66925436:-@exon:chr8:66922614-66922725:-@junction:chr8:66922393-66922613:-	SNHG6	bimodal
isoform1=junction:chr8:70598012-70600018:-|isoform2=junction:chr8:70598256-70600018:-@exon:chr8:70598134-70598255:-@junction:chr8:70598012-70598133:-	TRAM1	included
isoform1=junction:chr8:85214632-85217385:-|isoform2=junction:chr8:85215038-85217385:-@exon:chr8:85214921-85215037:-@junction:chr8:85214632-85214920:-	C8orf59	multimodal
isoform1=junction:chr8:85217503-85220305:-|isoform2=junction:chr8:85219361-85220305:-@exon:chr8:85219236-85219360:-@junction:chr8:85217503-85219235:-	C8orf59	excluded
isoform1=junction:chr8:85217503-85220305:-|isoform2=junction:chr8:85219361-85220305:-@novel_exon:chr8:85219323-85219360:-@junction:chr8:85217503-85219322:-	C8orf59	excluded
isoform1=junction:chr8:85217503-85220305:-|isoform2=junction:chr8:85219364-85220305:-@exon:chr8:85219236-85219363:-@junction:chr8:85217503-85219235:-	C8orf59	excluded
isoform1=junction:chr8:85217503-85220305:-|isoform2=junction:chr8:85219364-85220305:-@exon:chr8:85219323-85219363:-@junction:chr8:85217503-85219322:-	C8orf59	multimodal
isoform1=junction:chr8:86480333-86486483:-|isoform2=junction:chr8:86484962-86486483:-@exon:chr8:86484872-86484961:-@junction:chr8:86480333-86484871:-	RMDN1	included
isoform1=junction:chr8:95035577-95041569:+|isoform2=junction:chr8:95035577-95036301:+@exon:chr8:95036302-95036494:+@junction:chr8:95036495-95041569:+	NDUFAF6	excluded
isoform1=junction:chr8:97691189-97706625:+|isoform2=junction:chr8:97691189-97699753:+@exon:chr8:97699754-97699852:+@junction:chr8:97699853-97706625:+	MTDH	included
isoform1=junction:chr9:111914747-111922848:+|isoform2=junction:chr9:111914747-111915758:+@exon:chr9:111915759-111915836:+@junction:chr9:111915837-111922848:+	UGCG	excluded
isoform1=junction:chr9:112234898-112252677:-|isoform2=junction:chr9:112251104-112252677:-@exon:chr9:112250929-112251103:-@junction:chr9:112234898-112250928:-	PTBP3	bimodal
isoform1=junction:chr9:121268220-121301962:+|isoform2=junction:chr9:121268220-121281469:+@exon:chr9:121281470-121281562:+@junction:chr9:121281563-121301962:+	GSN	included
isoform1=junction:chr9:122148278-122159626:-|isoform2=junction:chr9:122152409-122159626:-@exon:chr9:122152245-122152408:-@junction:chr9:122148278-122152244:-	NDUFA8	included
isoform1=junction:chr9:124384657-124412351:-|isoform2=junction:chr9:124405433-124412351:-@exon:chr9:124405317-124405432:-@junction:chr9:124384657-124405316:-	PSMB7	included
isoform1=junction:chr9:127449363-127450730:-|isoform2=junction:chr9:127449709-127450730:-@exon:chr9:127449610-127449708:-@junction:chr9:127449363-127449609:-	RPL12	included
isoform1=junction:chr9:128268525-128273849:-|isoform2=junction:chr9:128272866-128273849:-@exon:chr9:128272785-128272865:-@junction:chr9:128268525-128272784:-	GOLGA2	excluded
isoform1=junction:chr9:128635260-128636280:-|isoform2=junction:chr9:128635768-128636280:-@exon:chr9:128635658-128635767:-@junction:chr9:128635260-128635657:-	WDR34	included
isoform1=junction:chr9:133357815-133360264:+|isoform2=junction:chr9:133357815-133359949:+@exon:chr9:133359950-133360129:+@junction:chr9:133360130-133360264:+	SURF2	bimodal
isoform1=junction:chr9:136674808-136676960:-|isoform2=junction:chr9:136676681-136676960:-@exon:chr9:136676585-136676680:-@junction:chr9:136674808-136676584:-	AGPAT2	included
isoform1=junction:chr9:136850138-136850754:+|isoform2=junction:chr9:136850138-136850502:+@exon:chr9:136850503-136850560:+@junction:chr9:136850561-136850754:+	PHPT1	excluded
isoform1=junction:chr9:136850138-136850754:+|isoform2=junction:chr9:136850138-136850505:+@exon:chr9:136850506-136850560:+@junction:chr9:136850561-136850754:+	PHPT1	excluded
isoform1=junction:chr9:32491421-32493760:-|isoform2=junction:chr9:32492539-32493760:-@exon:chr9:32492391-32492538:-@junction:chr9:32491421-32492390:-	DDX58	included
isoform1=junction:chr9:32553945-32570959:-|isoform2=junction:chr9:32558955-32570959:-@exon:chr9:32558910-32558954:-@junction:chr9:32553945-32558909:-	NDUFB6	included
isoform1=junction:chr9:32558955-32572880:-|isoform2=junction:chr9:32571053-32572880:-@exon:chr9:32570960-32571052:-@junction:chr9:32558955-32570959:-	NDUFB6	included
isoform1=junction:chr9:33026617-33029884:+|isoform2=junction:chr9:33026617-33026812:+@exon:chr9:33026813-33026990:+@junction:chr9:33026991-33029884:+	DNAJA1	included
isoform1=junction:chr9:36197589-36204067:+|isoform2=junction:chr9:36197589-36198978:+@exon:chr9:36198979-36199096:+@junction:chr9:36199097-36204067:+	CLTA	included
isoform1=junction:chr9:83973400-83974516:-|isoform2=junction:chr9:83973974-83974516:-@exon:chr9:83973902-83973973:-@junction:chr9:83973400-83973901:-	HNRNPK	included
isoform1=junction:chr9:83974590-83976994:-|isoform2=junction:chr9:83975506-83976994:-@exon:chr9:83975462-83975505:-@junction:chr9:83974590-83975461:-	HNRNPK	included
isoform1=junction:chr9:86046573-86077411:-|isoform2=junction:chr9:86052592-86077411:-@exon:chr9:86052537-86052591:-@junction:chr9:86046573-86052536:-	GOLM1	included
isoform1=junction:chr9:92287911-92289300:-|isoform2=junction:chr9:92288283-92289300:-@exon:chr9:92288126-92288282:-@junction:chr9:92287911-92288125:-	IARS	included
isoform1=junction:chr9:93110722-93112217:+|isoform2=junction:chr9:93110722-93111878:+@exon:chr9:93111879-93111938:+@junction:chr9:93111939-93112217:+	CARD19	multimodal
isoform1=junction:chr9:96641887-96651389:-|isoform2=junction:chr9:96646025-96651389:-@exon:chr9:96645893-96646024:-@junction:chr9:96641887-96645892:-	AAED1	excluded
isoform1=junction:chr9:97910617-97913400:-|isoform2=junction:chr9:97912976-97913400:-@exon:chr9:97912873-97912975:-@junction:chr9:97910617-97912872:-	TRMO	multimodal
isoform1=junction:chr9:99218837-99221546:-|isoform2=junction:chr9:99221138-99221546:-@exon:chr9:99220979-99221137:-@junction:chr9:99218837-99220978:-	ALG2	bimodal
isoform1=junction:chrX:103254018-103255077:-|isoform2=junction:chrX:103254678-103255077:-@exon:chrX:103254605-103254677:-@junction:chrX:103254018-103254604:-	TCEAL8	multimodal
isoform1=junction:chrX:103356607-103357614:+|isoform2=junction:chrX:103356607-103357082:+@exon:chrX:103357083-103357161:+@junction:chrX:103357162-103357614:+	TCEAL9	multimodal
isoform1=junction:chrX:103677052-103685170:-|isoform2=junction:chrX:103678601-103685170:-@exon:chrX:103678499-103678600:-@junction:chrX:103677052-103678498:-	MORF4L2	included
isoform1=junction:chrX:103677052-103685170:-|isoform2=junction:chrX:103678652-103685170:-@exon:chrX:103678499-103678651:-@junction:chrX:103677052-103678498:-	MORF4L2	included
isoform1=junction:chrX:111685104-111687886:+|isoform2=junction:chrX:111685104-111686136:+@exon:chrX:111686137-111686174:+@junction:chrX:111686175-111687886:+	ALG13	bimodal
isoform1=junction:chrX:119575401-119582587:+|isoform2=junction:chrX:119575401-119581506:+@exon:chrX:119581507-119581596:+@junction:chrX:119581597-119582587:+	UBE2A	bimodal
isoform1=junction:chrX:13735347-13736477:+|isoform2=junction:chrX:13735347-13736107:+@exon:chrX:13736108-13736296:+@junction:chrX:13736297-13736477:+	OFD1	excluded
isoform1=junction:chrX:153786450-153787050:-|isoform2=junction:chrX:153786948-153787050:-@exon:chrX:153786801-153786947:-@junction:chrX:153786450-153786800:-	IDH3G	included
isoform1=junction:chrX:153796553-153797724:+|isoform2=junction:chrX:153796553-153797457:+@exon:chrX:153797458-153797532:+@junction:chrX:153797533-153797724:+	SSR4	included
isoform1=junction:chrX:154399942-154400701:+|isoform2=junction:chrX:154399942-154400463:+@exon:chrX:154400464-154400626:+@junction:chrX:154400627-154400701:+	RPL10	included
isoform1=junction:chrX:21940874-21971896:+|isoform2=junction:chrX:21940874-21967195:+@exon:chrX:21967196-21967316:+@junction:chrX:21967317-21971896:+	SMS	included
isoform1=junction:chrX:23733218-23735918:-|isoform2=junction:chrX:23734368-23735918:-@exon:chrX:23734341-23734367:-@junction:chrX:23733218-23734340:-	ACOT9	bimodal
isoform1=junction:chrX:23783710-23784364:+@novel_exon:chrX:23784365-23784403:+@junction:chrX:23784404-23785327:+|isoform2=junction:chrX:23783710-23783799:+@exon:chrX:23783800-23783883:+@junction:chrX:23783884-23785327:+	SAT1	included
isoform1=junction:chrX:23783710-23785327:+|isoform2=junction:chrX:23783710-23783799:+@exon:chrX:23783800-23783883:+@junction:chrX:23783884-23785327:+	SAT1	included
isoform1=junction:chrX:23783884-23785327:+|isoform2=junction:chrX:23783884-23784293:+@exon:chrX:23784294-23784403:+@junction:chrX:23784404-23785327:+	SAT1	excluded
isoform1=junction:chrX:40591366-40597526:+|isoform2=junction:chrX:40591366-40597248:+@exon:chrX:40597249-40597344:+@junction:chrX:40597345-40597526:+	ATP6AP2	included
isoform1=junction:chrX:48575284-48576313:+|isoform2=junction:chrX:48575284-48575560:+@exon:chrX:48575561-48575667:+@junction:chrX:48575668-48576313:+	RBM3	included
isoform1=junction:chrX:76175614-76177615:+|isoform2=junction:chrX:76175614-76176880:+@exon:chrX:76176881-76176992:+@junction:chrX:76176993-76177615:+	PBDC1	included

## Sheet: SRP131647_CTCclusters
ASE_ID	Gene_Symbol	Modality
isoform1=junction:chr10:100986976-100987312:-|isoform2=junction:chr10:100987197-100987312:-@exon:chr10:100987090-100987196:-@junction:chr10:100986976-100987089:-	MRPL43	included
isoform1=junction:chr10:102481173-102482000:-|isoform2=junction:chr10:102481899-102482000:-@exon:chr10:102481837-102481898:-@junction:chr10:102481173-102481836:-	ACTR1A	bimodal
isoform1=junction:chr10:103392467-103396408:-|isoform2=junction:chr10:103394395-103396408:-@exon:chr10:103394199-103394394:-@junction:chr10:103392467-103394198:-	USMG5	excluded
isoform1=junction:chr10:104259799-104266083:+|isoform2=junction:chr10:104259799-104262978:+@exon:chr10:104262979-104263077:+@junction:chr10:104263078-104266083:+	GSTO1	included
isoform1=junction:chr10:125796189-125807412:-|isoform2=junction:chr10:125798146-125807412:-@exon:chr10:125798065-125798145:-@junction:chr10:125796189-125798064:-	UROS	included
isoform1=junction:chr10:22318169-22318652:+|isoform2=junction:chr10:22318169-22318271:+@exon:chr10:22318272-22318306:+@junction:chr10:22318307-22318652:+	COMMD3	included
isoform1=junction:chr10:26770346-26777064:-|isoform2=junction:chr10:26771090-26777064:-@exon:chr10:26771075-26771089:-@junction:chr10:26770346-26771074:-	ABI1	excluded
isoform1=junction:chr10:27509931-27532506:+|isoform2=junction:chr10:27509931-27526827:+@exon:chr10:27526828-27526889:+@junction:chr10:27526890-27532506:+	RAB18	included
isoform1=junction:chr10:32935559-32958144:-|isoform2=junction:chr10:32953810-32958144:-@exon:chr10:32953593-32953809:-@junction:chr10:32935559-32953592:-	ITGB1	excluded
isoform1=junction:chr10:33197710-33207571:-|isoform2=junction:chr10:33202996-33207571:-@exon:chr10:33202891-33202995:-@junction:chr10:33197710-33202890:-	NRP1	multimodal
isoform1=junction:chr10:3779591-3781640:-|isoform2=junction:chr10:3780230-3781640:-@exon:chr10:3780106-3780229:-@junction:chr10:3779591-3780105:-	KLF6	included
isoform1=junction:chr10:3782215-3784912:-|isoform2=junction:chr10:3783282-3784912:-@exon:chr10:3783216-3783281:-@junction:chr10:3782215-3783215:-	KLF6	excluded
isoform1=junction:chr10:5786051-5796762:-|isoform2=junction:chr10:5795020-5796762:-@exon:chr10:5794885-5795019:-@junction:chr10:5786051-5794884:-	GDI2	included
isoform1=junction:chr10:60785788-60791889:+|isoform2=junction:chr10:60785788-60788059:+@exon:chr10:60788060-60788230:+@junction:chr10:60788231-60791889:+	CDK1	included
isoform1=junction:chr10:63521578-63594777:+|isoform2=junction:chr10:63521578-63566337:+@exon:chr10:63566338-63566410:+@junction:chr10:63566411-63594777:+	REEP3	included
isoform1=junction:chr10:68737049-68740628:+|isoform2=junction:chr10:68737049-68737844:+@exon:chr10:68737845-68737889:+@junction:chr10:68737890-68740628:+	CCAR1	included
isoform1=junction:chr10:68755537-68757293:+|isoform2=junction:chr10:68755537-68756272:+@exon:chr10:68756273-68756483:+@junction:chr10:68756484-68757293:+	CCAR1	included
isoform1=junction:chr10:69088237-69103870:+|isoform2=junction:chr10:69088237-69097083:+@exon:chr10:69097084-69097231:+@junction:chr10:69097232-69103870:+	SRGN	included
isoform1=junction:chr10:71822008-71825836:-|isoform2=junction:chr10:71823897-71825836:-@exon:chr10:71823888-71823896:-@junction:chr10:71822008-71823887:-	PSAP	multimodal
isoform1=junction:chr10:73911613-73912214:+|isoform2=junction:chr10:73911613-73912040:+@exon:chr10:73912041-73912068:+@junction:chr10:73912069-73912214:+	PLAU	multimodal
isoform1=junction:chr10:86968606-86970475:+|isoform2=junction:chr10:86968606-86970199:+@exon:chr10:86970200-86970262:+@junction:chr10:86970263-86970475:+	ADIRF	included
isoform1=junction:chr10:87715844-87727283:+|isoform2=junction:chr10:87715844-87721755:+@exon:chr10:87721756-87721770:+@junction:chr10:87721771-87727283:+	PAPSS2	multimodal
isoform1=junction:chr10:95238686-95263863:-|isoform2=junction:chr10:95247367-95263863:-@exon:chr10:95247215-95247366:-@junction:chr10:95238686-95247214:-	PDLIM1	included
isoform1=junction:chr10:95268863-95290819:-|isoform2=junction:chr10:95271785-95290819:-@exon:chr10:95271633-95271784:-@junction:chr10:95268863-95271632:-	PDLIM1	multimodal
isoform1=junction:chr1:108696338-108698603:+|isoform2=junction:chr1:108696338-108697946:+@novel_exon:chr1:108697947-108698017:+@junction:chr1:108698018-108698603:+	PRPF38B	excluded
isoform1=junction:chr1:109236549-109237243:+|isoform2=junction:chr1:109236549-109236804:+@exon:chr1:109236805-109236870:+@junction:chr1:109236871-109237243:+	SARS	excluded
isoform1=junction:chr1:110406380-110407585:-|isoform2=junction:chr1:110407129-110407585:-@exon:chr1:110407033-110407128:-@junction:chr1:110406380-110407032:-	LAMTOR5	excluded
isoform1=junction:chr11:10801088-10802048:-|isoform2=junction:chr11:10801775-10802048:-@exon:chr11:10801661-10801774:-@junction:chr11:10801088-10801660:-	EIF4G2	multimodal
isoform1=junction:chr11:108134317-108138897:+|isoform2=junction:chr11:108134317-108135141:+@exon:chr11:108135142-108135242:+@junction:chr11:108135243-108138897:+	ACAT1	included
isoform1=junction:chr1:111441390-111442024:-|isoform2=junction:chr1:111441605-111442024:-@exon:chr1:111441499-111441604:-@junction:chr1:111441390-111441498:-	WDR77	multimodal
isoform1=junction:chr1:111449874-111456085:+|isoform2=junction:chr1:111449874-111454210:+@exon:chr1:111454211-111454356:+@junction:chr1:111454357-111456085:+	ATP5F1	included
isoform1=junction:chr11:120429518-120431770:+|isoform2=junction:chr11:120429518-120429711:+@exon:chr11:120429712-120429831:+@junction:chr11:120429832-120431770:+	ARHGEF12	multimodal
isoform1=junction:chr11:123060269-123061119:-|isoform2=junction:chr11:123060799-123061119:-@exon:chr11:123060593-123060798:-@junction:chr11:123060269-123060592:-	HSPA8	included
isoform1=junction:chr1:112703807-112707077:-|isoform2=junction:chr1:112705124-112707077:-@novel_exon:chr1:112705053-112705123:-@junction:chr1:112703807-112705052:-	RHOC	excluded
isoform1=junction:chr1:112703807-112707077:-|isoform2=junction:chr1:112705169-112707077:-@exon:chr1:112705100-112705168:-@junction:chr1:112703807-112705099:-	RHOC	multimodal
isoform1=junction:chr11:130135716-130140397:+|isoform2=junction:chr11:130135716-130137255:+@exon:chr11:130137256-130137291:+@junction:chr11:130137292-130140397:+	APLP2	excluded
isoform1=junction:chr11:16744685-16752784:+|isoform2=junction:chr11:16744685-16748096:+@exon:chr11:16748097-16748157:+@junction:chr11:16748158-16752784:+	C11orf58	included
isoform1=junction:chr11:16748158-16754870:+|isoform2=junction:chr11:16748158-16752784:+@exon:chr11:16752785-16752894:+@junction:chr11:16752895-16754870:+	C11orf58	included
isoform1=junction:chr1:117153370-117170106:-|isoform2=junction:chr1:117156922-117170106:-@exon:chr1:117156574-117156921:-@junction:chr1:117153370-117156573:-	VTCN1	included
isoform1=junction:chr11:17282944-17295323:+|isoform2=junction:chr11:17282944-17286633:+@exon:chr11:17286634-17286717:+@junction:chr11:17286718-17295323:+	NUCB2	multimodal
isoform1=junction:chr11:18516165-18526774:-|isoform2=junction:chr11:18519604-18526774:-@exon:chr11:18519519-18519603:-@junction:chr11:18516165-18519518:-	TSG101	included
isoform1=junction:chr1:119752675-119755426:-|isoform2=junction:chr1:119753387-119755426:-@exon:chr1:119753280-119753386:-@junction:chr1:119752675-119753279:-	HMGCS2	included
isoform1=junction:chr11:239077-244160:+|isoform2=junction:chr11:239077-244040:+@exon:chr11:244041-244075:+@junction:chr11:244076-244160:+	PSMD13	included
isoform1=junction:chr11:319991-320564:-|isoform2=junction:chr11:320249-320564:-@exon:chr11:320113-320248:-@junction:chr11:319991-320112:-	IFITM3	excluded
isoform1=junction:chr11:33722464-33736381:-|isoform2=junction:chr11:33731469-33736381:-@exon:chr11:33731424-33731468:-@junction:chr11:33722464-33731423:-	CD59	excluded
isoform1=junction:chr11:35190066-35209964:+|isoform2=junction:chr11:35190066-35208104:+@exon:chr11:35208105-35208206:+@junction:chr11:35208207-35209964:+	CD44	included
isoform1=junction:chr11:35190066-35214851:+|isoform2=junction:chr11:35190066-35209964:+@exon:chr11:35209965-35210054:+@junction:chr11:35210055-35214851:+	CD44	excluded
isoform1=junction:chr11:35210055-35214851:+|isoform2=junction:chr11:35210055-35211245:+@exon:chr11:35211246-35211449:+@junction:chr11:35211450-35214851:+	CD44	included
isoform1=junction:chr11:47565987-47571470:+|isoform2=junction:chr11:47565987-47569699:+@exon:chr11:47569700-47569891:+@junction:chr11:47569892-47571470:+	NDUFS3	multimodal
isoform1=junction:chr11:47629047-47631035:-|isoform2=junction:chr11:47630615-47631035:-@exon:chr11:47630555-47630614:-@junction:chr11:47629047-47630554:-	MTCH2	included
isoform1=junction:chr11:47634735-47638698:-|isoform2=junction:chr11:47635572-47638698:-@exon:chr11:47635545-47635571:-@junction:chr11:47634735-47635544:-	MTCH2	included
isoform1=junction:chr1:150267790-150268697:-|isoform2=junction:chr1:150268128-150268697:-@exon:chr1:150267957-150268127:-@junction:chr1:150267790-150267956:-	APH1A	included
isoform1=junction:chr1:150577492-150578842:-|isoform2=junction:chr1:150578492-150578842:-@exon:chr1:150578244-150578491:-@junction:chr1:150577492-150578243:-	MCL1	multimodal
isoform1=junction:chr1:151055994-151059478:-|isoform2=junction:chr1:151056787-151059478:-@exon:chr1:151056651-151056786:-@junction:chr1:151055994-151056650:-	CDC42SE1	excluded
isoform1=junction:chr1:151055994-151059478:-|isoform2=junction:chr1:151056787-151059478:-@exon:chr1:151056656-151056786:-@junction:chr1:151055994-151056655:-	CDC42SE1	excluded
isoform1=junction:chr1:153544810-153545752:-|isoform2=junction:chr1:153545519-153545752:-@exon:chr1:153545470-153545518:-@junction:chr1:153544810-153545469:-	S100A4	excluded
isoform1=junction:chr1:153561592-153563733:-|isoform2=junction:chr1:153563537-153563733:-@exon:chr1:153563415-153563536:-@junction:chr1:153561592-153563414:-	S100A2	excluded
isoform1=junction:chr1:153615023-153615828:-|isoform2=junction:chr1:153615382-153615828:-@exon:chr1:153615235-153615381:-@junction:chr1:153615023-153615234:-	S100A14	included
isoform1=junction:chr1:153975906-153976975:-|isoform2=junction:chr1:153976776-153976975:-@exon:chr1:153976693-153976775:-@junction:chr1:153975906-153976692:-	JTB	included
isoform1=junction:chr1:153982809-153983520:-|isoform2=junction:chr1:153983297-153983520:-@exon:chr1:153983219-153983296:-@junction:chr1:153982809-153983218:-	RAB13	included
isoform1=junction:chr1:153990803-153991114:+|isoform2=junction:chr1:153990803-153990913:+@exon:chr1:153990914-153991034:+@junction:chr1:153991035-153991114:+	RPS27	excluded
isoform1=junction:chr1:154157722-154170399:-|isoform2=junction:chr1:154169384-154170399:-@exon:chr1:154169305-154169383:-@junction:chr1:154157722-154169304:-	TPM3	excluded
isoform1=junction:chr1:154171489-154172907:-@exon:chr1:154171413-154171488:-@junction:chr1:154170712-154171412:-|isoform2=junction:chr1:154172105-154172907:-@exon:chr1:154172029-154172104:-@junction:chr1:154170712-154172028:-	TPM3	included
isoform1=junction:chr1:154173202-154182987:-|isoform2=junction:chr1:154176249-154182987:-@exon:chr1:154176115-154176248:-@junction:chr1:154173202-154176114:-	TPM3	included
isoform1=junction:chr1:154212625-154214456:-|isoform2=junction:chr1:154213947-154214456:-@exon:chr1:154213893-154213946:-@junction:chr1:154212625-154213892:-	C1orf43	included
isoform1=junction:chr1:154214575-154220341:-|isoform2=junction:chr1:154219938-154220341:-@exon:chr1:154219836-154219937:-@junction:chr1:154214575-154219835:-	C1orf43	multimodal
isoform1=junction:chr1:155052778-155053909:+|isoform2=junction:chr1:155052778-155053416:+@exon:chr1:155053417-155053493:+@junction:chr1:155053494-155053909:+	ADAM15	included
isoform1=junction:chr1:155053989-155054313:+|isoform2=junction:chr1:155053989-155054149:+@exon:chr1:155054150-155054226:+@junction:chr1:155054227-155054313:+	ADAM15	included
isoform1=junction:chr1:155131635-155133729:+|isoform2=junction:chr1:155131635-155133502:+@exon:chr1:155133503-155133568:+@junction:chr1:155133569-155133729:+	EFNA1	multimodal
isoform1=junction:chr1:155136377-155137560:+|isoform2=junction:chr1:155136377-155136827:+@exon:chr1:155136828-155136951:+@junction:chr1:155136952-155137560:+	SLC50A1	included
isoform1=junction:chr1:155136952-155137978:+|isoform2=junction:chr1:155136952-155137560:+@exon:chr1:155137561-155137722:+@junction:chr1:155137723-155137978:+	SLC50A1	included
isoform1=junction:chr1:155187375-155187721:-|isoform2=junction:chr1:155187577-155187721:-@exon:chr1:155187455-155187576:-@junction:chr1:155187375-155187454:-	MUC1	included
isoform1=junction:chr1:155210628-155212384:+|isoform2=junction:chr1:155210628-155212126:+@exon:chr1:155212127-155212219:+@junction:chr1:155212220-155212384:+	MTX1	included
isoform1=junction:chr1:155308966-155310042:+|isoform2=junction:chr1:155308966-155309752:+@exon:chr1:155309753-155309965:+@junction:chr1:155309966-155310042:+	FDPS	excluded
isoform1=junction:chr1:155308966-155310042:+|isoform2=junction:chr1:155308966-155309788:+@exon:chr1:155309789-155309965:+@junction:chr1:155309966-155310042:+	FDPS	excluded
isoform1=junction:chr1:155308966-155310063:+|isoform2=junction:chr1:155308966-155309752:+@exon:chr1:155309753-155309965:+@junction:chr1:155309966-155310063:+	FDPS	excluded
isoform1=junction:chr1:155308966-155310063:+|isoform2=junction:chr1:155308966-155309788:+@exon:chr1:155309789-155309965:+@junction:chr1:155309966-155310063:+	FDPS	excluded
isoform1=junction:chr1:155308966-155312254:+|isoform2=junction:chr1:155308966-155310042:+@exon:chr1:155310043-155310205:+@junction:chr1:155310206-155312254:+	FDPS	included
isoform1=junction:chr1:155308966-155312254:+|isoform2=junction:chr1:155308966-155310063:+@exon:chr1:155310064-155310205:+@junction:chr1:155310206-155312254:+	FDPS	included
isoform1=junction:chr1:155318292-155318855:+|isoform2=junction:chr1:155318292-155318664:+@exon:chr1:155318665-155318753:+@junction:chr1:155318754-155318855:+	FDPS	included
isoform1=junction:chr1:155319689-155320408:+|isoform2=junction:chr1:155319689-155319793:+@exon:chr1:155319794-155319928:+@junction:chr1:155319929-155320408:+	FDPS	included
isoform1=junction:chr1:156055426-156058314:+|isoform2=junction:chr1:156055426-156057977:+@exon:chr1:156057978-156058067:+@junction:chr1:156058068-156058314:+	LAMTOR2	included
isoform1=junction:chr1:156061444-156068269:+|isoform2=junction:chr1:156061444-156065910:+@exon:chr1:156065911-156066106:+@junction:chr1:156066107-156068269:+	RAB25	included
isoform1=junction:chr1:156115275-156134402:+|isoform2=junction:chr1:156115275-156130616:+@exon:chr1:156130617-156130773:+@junction:chr1:156130774-156134402:+	LMNA	included
isoform1=junction:chr1:156232426-156236287:+|isoform2=junction:chr1:156232426-156233627:+@exon:chr1:156233628-156233728:+@junction:chr1:156233729-156236287:+	PMF1	included
isoform1=junction:chr1:156744349-156745007:-|isoform2=junction:chr1:156744571-156745007:-@exon:chr1:156744501-156744570:-@junction:chr1:156744349-156744500:-	HDGF	excluded
isoform1=junction:chr11:57737669-57738353:+|isoform2=junction:chr11:57737669-57737912:+@exon:chr11:57737913-57738026:+@junction:chr11:57738027-57738353:+	TMX2	included
isoform1=junction:chr11:58838369-58844433:-|isoform2=junction:chr11:58839653-58844433:-@exon:chr11:58839535-58839652:-@junction:chr11:58838369-58839534:-	GLYATL2	multimodal
isoform1=junction:chr1:160205523-160211542:+|isoform2=junction:chr1:160205523-160207132:+@exon:chr1:160207133-160207237:+@junction:chr1:160207238-160211542:+	PEA15	excluded
isoform1=junction:chr11:60903862-60906363:-|isoform2=junction:chr11:60905453-60906363:-@exon:chr11:60905365-60905452:-@junction:chr11:60903862-60905364:-	PRPF19	excluded
isoform1=junction:chr1:161038076-161038879:-|isoform2=junction:chr1:161038674-161038879:-@exon:chr1:161038551-161038673:-@junction:chr1:161038076-161038550:-	TSTD1	included
isoform1=junction:chr1:161157018-161157616:+|isoform2=junction:chr1:161157018-161157253:+@exon:chr1:161157254-161157317:+@junction:chr1:161157318-161157616:+	UFC1	included
isoform1=junction:chr1:161157694-161158411:+|isoform2=junction:chr1:161157694-161158120:+@exon:chr1:161158121-161158211:+@junction:chr1:161158212-161158411:+	UFC1	included
isoform1=junction:chr1:161215371-161218240:+|isoform2=junction:chr1:161215371-161217985:+@exon:chr1:161217986-161218077:+@junction:chr1:161218078-161218240:+	FCER1G	multimodal
isoform1=junction:chr1:161340656-161362328:+|isoform2=junction:chr1:161340656-161356676:+@exon:chr1:161356677-161356840:+@junction:chr1:161356841-161362328:+	SDHC	included
isoform1=junction:chr1:162498269-162503753:+|isoform2=junction:chr1:162498269-162499954:+@exon:chr1:162499955-162501104:+@junction:chr1:162501105-162503753:+	UHMK1	included
isoform1=junction:chr11:62789427-62789885:+|isoform2=junction:chr11:62789427-62789600:+@exon:chr11:62789601-62789679:+@junction:chr11:62789680-62789885:+	TMEM179B	included
isoform1=junction:chr11:62853834-62854518:-|isoform2=junction:chr11:62854065-62854518:-@exon:chr11:62854018-62854064:-@junction:chr11:62853834-62854017:-	SNHG1	multimodal
isoform1=junction:chr11:63536878-63544620:+|isoform2=junction:chr11:63536878-63539515:+@exon:chr11:63539516-63539624:+@junction:chr11:63539625-63544620:+	RARRES3	included
isoform1=junction:chr11:64227133-64227567:+|isoform2=junction:chr11:64227133-64227400:+@exon:chr11:64227401-64227493:+@junction:chr11:64227494-64227567:+	NUDT22	excluded
isoform1=junction:chr11:64227133-64229246:+|isoform2=junction:chr11:64227133-64227567:+@exon:chr11:64227568-64227666:+@junction:chr11:64227667-64229246:+	NUDT22	multimodal
isoform1=junction:chr11:64318387-64320660:+|isoform2=junction:chr11:64318387-64319733:+@exon:chr11:64319734-64319868:+@junction:chr11:64319869-64320660:+	PRDX5	included
isoform1=junction:chr11:64319869-64320864:+|isoform2=junction:chr11:64319869-64320660:+@exon:chr11:64320661-64320792:+@junction:chr11:64320793-64320864:+	PRDX5	included
isoform1=junction:chr11:6478960-6479971:-|isoform2=junction:chr11:6479259-6479971:-@exon:chr11:6479140-6479258:-@junction:chr11:6478960-6479139:-	ARFIP2	included
isoform1=junction:chr1:165651088-165654278:+|isoform2=junction:chr1:165651088-165651977:+@exon:chr1:165651978-165652035:+@junction:chr1:165652036-165654278:+	MGST3	included
isoform1=junction:chr11:65855449-65855934:-|isoform2=junction:chr11:65855731-65855934:-@exon:chr11:65855654-65855730:-@junction:chr11:65855449-65855653:-	CFL1	included
isoform1=junction:chr11:65893297-65896808:-|isoform2=junction:chr11:65894122-65896808:-@exon:chr11:65894014-65894121:-@junction:chr11:65893297-65894013:-	FOSL1	multimodal
isoform1=junction:chr11:66002571-66003625:+|isoform2=junction:chr11:66002571-66003234:+@exon:chr11:66003235-66003373:+@junction:chr11:66003374-66003625:+	BANF1	included
isoform1=junction:chr11:6604361-6608393:+|isoform2=junction:chr11:6604361-6608045:+@exon:chr11:6608046-6608211:+@junction:chr11:6608212-6608393:+	ILK	included
isoform1=junction:chr11:6608490-6608883:+|isoform2=junction:chr11:6608490-6608693:+@exon:chr11:6608694-6608790:+@junction:chr11:6608791-6608883:+	ILK	included
isoform1=junction:chr11:6608968-6609298:+|isoform2=junction:chr11:6608968-6609070:+@exon:chr11:6609071-6609156:+@junction:chr11:6609157-6609298:+	ILK	included
isoform1=junction:chr11:66337890-66338720:-|isoform2=junction:chr11:66338283-66338720:-@exon:chr11:66338243-66338282:-@junction:chr11:66337890-66338242:-	BRMS1	included
isoform1=junction:chr11:66640124-66646026:+|isoform2=junction:chr11:66640124-66643449:+@exon:chr11:66643450-66644140:+@junction:chr11:66644141-66646026:+	RBM14-RBM4	multimodal
isoform1=junction:chr11:67583845-67584463:+|isoform2=junction:chr11:67583845-67584133:+@exon:chr11:67584134-67584169:+@junction:chr11:67584170-67584463:+	GSTP1	included
isoform1=junction:chr1:167773369-167787819:+|isoform2=junction:chr1:167773369-167776063:+@exon:chr1:167776064-167776166:+@junction:chr1:167776167-167787819:+	MPZL1	bimodal
isoform1=junction:chr1:168231920-168236588:+|isoform2=junction:chr1:168231920-168235100:+@exon:chr1:168235101-168235182:+@junction:chr1:168235183-168236588:+	SFT2D2	included
isoform1=junction:chr11:72755754-72758529:-|isoform2=junction:chr11:72757885-72758529:-@exon:chr11:72757767-72757884:-@junction:chr11:72755754-72757766:-	STARD10	included
isoform1=junction:chr11:73677963-73707419:-|isoform2=junction:chr11:73679721-73707419:-@exon:chr11:73679654-73679720:-@junction:chr11:73677963-73679653:-	RAB6A	included
isoform1=junction:chr11:73718719-73720845:-@exon:chr11:73718613-73718718:-@junction:chr11:73716363-73718612:-|isoform2=junction:chr11:73718891-73720845:-@exon:chr11:73718785-73718890:-@junction:chr11:73716363-73718784:-	RAB6A	multimodal
isoform1=junction:chr1:173864305-173864674:-|isoform2=junction:chr1:173864507-173864674:-@exon:chr1:173864484-173864506:-@junction:chr1:173864305-173864483:-	GAS5	multimodal
isoform1=junction:chr1:173864305-173865228:-|isoform2=junction:chr1:173864705-173865228:-@exon:chr1:173864484-173864704:-@junction:chr1:173864305-173864483:-	GAS5	included
isoform1=junction:chr1:173864305-173865228:-|isoform2=junction:chr1:173864705-173865228:-@exon:chr1:173864675-173864704:-@junction:chr1:173864305-173864674:-	GAS5	included
isoform1=junction:chr1:173864705-173865470:-|isoform2=junction:chr1:173865283-173865470:-@exon:chr1:173865229-173865282:-@junction:chr1:173864705-173865228:-	GAS5	included
isoform1=junction:chr1:173864705-173865509:-|isoform2=junction:chr1:173865283-173865509:-@exon:chr1:173865229-173865282:-@junction:chr1:173864705-173865228:-	GAS5	included
isoform1=junction:chr11:73873395-73876756:-|isoform2=junction:chr11:73876576-73876756:-@exon:chr11:73876479-73876575:-@junction:chr11:73873395-73876478:-	COA4	excluded
isoform1=junction:chr11:73975122-73976640:-|isoform2=junction:chr11:73975672-73976640:-@exon:chr11:73975491-73975671:-@junction:chr11:73975122-73975490:-	UCP2	included
isoform1=junction:chr11:73976743-73977885:-|isoform2=junction:chr11:73977018-73977885:-@exon:chr11:73976823-73977017:-@junction:chr11:73976743-73976822:-	UCP2	included
isoform1=junction:chr11:75401734-75404019:+|isoform2=junction:chr11:75401734-75402351:+@exon:chr11:75402352-75402446:+@junction:chr11:75402447-75404019:+	RPS3	included
isoform1=junction:chr1:182388751-182391678:-|isoform2=junction:chr1:182390853-182391678:-@exon:chr1:182390497-182390852:-@junction:chr1:182388751-182390496:-	GLUL	excluded
isoform1=junction:chr11:83274741-83280140:-|isoform2=junction:chr11:83278830-83280140:-@exon:chr11:83278726-83278829:-@junction:chr11:83274741-83278725:-	CCDC90B	multimodal
isoform1=junction:chr11:850368-864436:+|isoform2=junction:chr11:850368-862549:+@exon:chr11:862550-862741:+@junction:chr11:862742-864436:+	TSPAN4	multimodal
isoform1=junction:chr1:202013299-202013828:+|isoform2=junction:chr1:202013299-202013578:+@novel_exon:chr1:202013579-202013625:+@junction:chr1:202013626-202013828:+	ELF3	excluded
isoform1=junction:chr1:202013299-202013828:+|isoform2=junction:chr1:202013299-202013578:+@novel_exon:chr1:202013579-202013640:+@junction:chr1:202013641-202013828:+	ELF3	excluded
isoform1=junction:chr1:202333556-202335645:-|isoform2=junction:chr1:202335059-202335645:-@exon:chr1:202334989-202335058:-@junction:chr1:202333556-202334988:-	UBE2T	included
isoform1=junction:chr1:203861744-203863662:+|isoform2=junction:chr1:203861744-203862181:+@exon:chr1:203862182-203862222:+@junction:chr1:203862223-203863662:+	SNRPE	included
isoform1=junction:chr1:203862223-203865040:+|isoform2=junction:chr1:203862223-203863662:+@exon:chr1:203863663-203863725:+@junction:chr1:203863726-203865040:+	SNRPE	included
isoform1=junction:chr1:207767196-207767778:+|isoform2=junction:chr1:207767196-207767606:+@exon:chr1:207767607-207767651:+@junction:chr1:207767652-207767778:+	CD46	excluded
isoform1=junction:chr1:207767196-207770320:+@exon:chr1:207770321-207770362:+@junction:chr1:207770363-207783291:+|isoform2=junction:chr1:207767196-207767778:+@exon:chr1:207767779-207767823:+@junction:chr1:207767824-207783291:+	CD46	multimodal
isoform1=junction:chr1:207767196-207770320:+|isoform2=junction:chr1:207767196-207767778:+@exon:chr1:207767779-207767823:+@junction:chr1:207767824-207770320:+	CD46	multimodal
isoform1=junction:chr1:207767196-207783291:+|isoform2=junction:chr1:207767196-207767778:+@exon:chr1:207767779-207767823:+@junction:chr1:207767824-207783291:+	CD46	included
isoform1=junction:chr1:207767196-207783291:+|isoform2=junction:chr1:207767196-207770320:+@exon:chr1:207770321-207770362:+@junction:chr1:207770363-207783291:+	CD46	included
isoform1=junction:chr1:207767824-207783291:+|isoform2=junction:chr1:207767824-207770320:+@exon:chr1:207770321-207770362:+@junction:chr1:207770363-207783291:+	CD46	included
isoform1=junction:chr1:207785683-207793518:+|isoform2=junction:chr1:207785683-207790252:+@exon:chr1:207790253-207790345:+@junction:chr1:207790346-207793518:+	CD46	excluded
isoform1=junction:chr12:103931624-103932825:+|isoform2=junction:chr12:103931624-103932276:+@exon:chr12:103932277-103932418:+@junction:chr12:103932419-103932825:+	HSP90B1	included
isoform1=junction:chr12:105348627-105366616:+|isoform2=junction:chr12:105348627-105365806:+@exon:chr12:105365807-105365842:+@junction:chr12:105365843-105366616:+	C12orf75	included
isoform1=junction:chr12:10607937-10609830:-|isoform2=junction:chr12:10609384-10609830:-@exon:chr12:10609098-10609383:-@junction:chr12:10607937-10609097:-	MAGOHB	excluded
isoform1=junction:chr12:10610681-10613438:-|isoform2=junction:chr12:10612979-10613438:-@exon:chr12:10612640-10612978:-@junction:chr12:10610681-10612639:-	MAGOHB	excluded
isoform1=junction:chr12:108652418-108654305:-|isoform2=junction:chr12:108653061-108654305:-@exon:chr12:108653038-108653060:-@junction:chr12:108652418-108653037:-	CORO1C	excluded
isoform1=junction:chr12:110436205-110437083:-|isoform2=junction:chr12:110436684-110437083:-@exon:chr12:110436557-110436683:-@junction:chr12:110436205-110436556:-	ARPC3	included
isoform1=junction:chr12:110437153-110445451:-|isoform2=junction:chr12:110440389-110445451:-@exon:chr12:110440312-110440388:-@junction:chr12:110437153-110440311:-	ARPC3	included
isoform1=junction:chr12:110492123-110496011:-|isoform2=junction:chr12:110493232-110496011:-@exon:chr12:110492996-110493231:-@junction:chr12:110492123-110492995:-	VPS29	included
isoform1=junction:chr12:112013610-112022149:+|isoform2=junction:chr12:112013610-112019755:+@exon:chr12:112019756-112019894:+@junction:chr12:112019895-112022149:+	ERP29	included
isoform1=junction:chr12:120197463-120198853:-|isoform2=junction:chr12:120198740-120198853:-@exon:chr12:120198554-120198739:-@junction:chr12:120197463-120198553:-	RPLP0	included
isoform1=junction:chr12:120199486-120201082:-|isoform2=junction:chr12:120200832-120201082:-@exon:chr12:120200730-120200831:-@junction:chr12:120199486-120200729:-	RPLP0	included
isoform1=junction:chr12:120566981-120575630:+|isoform2=junction:chr12:120566981-120571190:+@exon:chr12:120571191-120571291:+@junction:chr12:120571292-120575630:+	RNF10	bimodal
isoform1=junction:chr12:121309864-121318276:-|isoform2=junction:chr12:121310012-121318276:-@exon:chr12:121309970-121310011:-@junction:chr12:121309864-121309969:-	ANAPC5	excluded
isoform1=junction:chr12:122341698-122352725:-|isoform2=junction:chr12:122347480-122352725:-@exon:chr12:122347375-122347479:-@junction:chr12:122341698-122347374:-	CLIP1	excluded
isoform1=junction:chr1:212433121-212444338:+|isoform2=junction:chr1:212433121-212442564:+@exon:chr1:212442565-212442625:+@junction:chr1:212442626-212444338:+	NENF	included
isoform1=junction:chr1:212618235-212619357:+|isoform2=junction:chr1:212618235-212619045:+@exon:chr1:212619046-212619266:+@junction:chr1:212619267-212619357:+	ATF3	excluded
isoform1=junction:chr12:14882281-14884212:-|isoform2=junction:chr12:14883048-14884212:-@exon:chr12:14882972-14883047:-@junction:chr12:14882281-14882971:-	MGP	included
isoform1=junction:chr12:15882820-15889927:+|isoform2=junction:chr12:15882820-15883540:+@exon:chr12:15883541-15883676:+@junction:chr12:15883677-15889927:+	STRAP	included
isoform1=junction:chr12:16347711-16357604:+|isoform2=junction:chr12:16347711-16354230:+@exon:chr12:16354231-16354378:+@junction:chr12:16354379-16357604:+	MGST1	included
isoform1=junction:chr12:16354379-16363794:+|isoform2=junction:chr12:16354379-16357604:+@exon:chr12:16357605-16357699:+@junction:chr12:16357700-16363794:+	MGST1	included
isoform1=junction:chr12:16357700-16363794:+|isoform2=junction:chr12:16357700-16360299:+@exon:chr12:16360300-16360443:+@junction:chr12:16360444-16363794:+	MGST1	excluded
isoform1=junction:chr1:224183419-224192331:+|isoform2=junction:chr1:224183419-224189576:+@exon:chr1:224189577-224190319:+@junction:chr1:224190320-224192331:+	DEGS1	included
isoform1=junction:chr1:224365992-224375794:+|isoform2=junction:chr1:224365992-224371282:+@exon:chr1:224371283-224371423:+@junction:chr1:224371424-224375794:+	CNIH4	included
isoform1=junction:chr12:27724187-27737538:+|isoform2=junction:chr12:27724187-27735446:+@exon:chr12:27735447-27735556:+@junction:chr12:27735557-27737538:+	MRPS35	included
isoform1=junction:chr1:228107870-228108234:-|isoform2=junction:chr1:228108138-228108234:-@exon:chr1:228107977-228108137:-@junction:chr1:228107870-228107976:-	MRPL55	excluded
isoform1=junction:chr1:228108319-228109148:-|isoform2=junction:chr1:228109022-228109148:-@exon:chr1:228108955-228109021:-@junction:chr1:228108319-228108954:-	MRPL55	multimodal
isoform1=junction:chr1:228140364-228145510:+|isoform2=junction:chr1:228140364-228141123:+@exon:chr1:228141124-228141288:+@junction:chr1:228141289-228145510:+	GUK1	multimodal
isoform1=junction:chr1:228141289-228145510:+|isoform2=junction:chr1:228141289-228141625:+@exon:chr1:228141626-228141829:+@junction:chr1:228141830-228145510:+	GUK1	excluded
isoform1=junction:chr1:228147700-228148664:+|isoform2=junction:chr1:228147700-228148370:+@exon:chr1:228148371-228148456:+@junction:chr1:228148457-228148664:+	GUK1	included
isoform1=junction:chr1:229299073-229303805:+|isoform2=junction:chr1:229299073-229302861:+@exon:chr1:229302862-229302989:+@junction:chr1:229302990-229303805:+	RAB4A	included
isoform1=junction:chr1:23321664-23333517:-|isoform2=junction:chr1:23323733-23333517:-@exon:chr1:23323556-23323732:-@junction:chr1:23321664-23323555:-	HNRNPR	included
isoform1=junction:chr1:23323733-23337753:-|isoform2=junction:chr1:23333632-23337753:-@exon:chr1:23333518-23333631:-@junction:chr1:23323733-23333517:-	HNRNPR	included
isoform1=junction:chr1:2397221-2400856:+|isoform2=junction:chr1:2397221-2399414:+@exon:chr1:2399415-2399514:+@junction:chr1:2399515-2400856:+	RER1	included
isoform1=junction:chr12:42322447-42325923:-|isoform2=junction:chr12:42324105-42325923:-@exon:chr12:42324019-42324104:-@junction:chr12:42322447-42324018:-	ZCRB1	included
isoform1=junction:chr12:42375075-42387455:+|isoform2=junction:chr12:42375075-42384939:+@exon:chr12:42384940-42384996:+@junction:chr12:42384997-42387455:+	PPHLN1	included
isoform1=junction:chr12:46367341-46370775:-|isoform2=junction:chr12:46370628-46370775:-@exon:chr12:46370512-46370627:-@junction:chr12:46367341-46370511:-	SLC38A2	multimodal
isoform1=junction:chr1:24646790-24648858:+|isoform2=junction:chr1:24646790-24647078:+@exon:chr1:24647079-24647208:+@junction:chr1:24647209-24648858:+	SRRM1	excluded
isoform1=junction:chr12:47965346-47966088:+|isoform2=junction:chr12:47965346-47965837:+@exon:chr12:47965838-47965997:+@junction:chr12:47965998-47966088:+	TMEM106C	included
isoform1=junction:chr12:48149999-48151200:-|isoform2=junction:chr12:48150141-48151200:-@exon:chr12:48150087-48150140:-@junction:chr12:48149999-48150086:-	ASB8	excluded
isoform1=junction:chr12:48151306-48153367:-|isoform2=junction:chr12:48151666-48153367:-@exon:chr12:48151610-48151665:-@junction:chr12:48151306-48151609:-	ASB8	excluded
isoform1=junction:chr12:48939780-48940947:-|isoform2=junction:chr12:48940108-48940947:-@exon:chr12:48939997-48940107:-@junction:chr12:48939780-48939996:-	AC073610.3	included
isoform1=junction:chr12:52051569-52054326:+|isoform2=junction:chr12:52051569-52052495:+@exon:chr12:52052496-52052645:+@junction:chr12:52052646-52054326:+	NR4A1	excluded
isoform1=junction:chr12:53295640-53296243:+|isoform2=junction:chr12:53295640-53295838:+@exon:chr12:53295839-53295941:+@junction:chr12:53295942-53296243:+	PFDN5	included
isoform1=junction:chr12:53295640-53297849:+|isoform2=junction:chr12:53295640-53295838:+@exon:chr12:53295839-53296275:+@junction:chr12:53296276-53297849:+	PFDN5	included
isoform1=junction:chr12:53295942-53297849:+|isoform2=junction:chr12:53295942-53296243:+@exon:chr12:53296244-53296275:+@junction:chr12:53296276-53297849:+	PFDN5	included
isoform1=junction:chr12:53303194-53306197:+|isoform2=junction:chr12:53303194-53305907:+@exon:chr12:53305908-53306060:+@junction:chr12:53306061-53306197:+	C12orf10	included
isoform1=junction:chr12:53467294-53468776:+|isoform2=junction:chr12:53467294-53467804:+@exon:chr12:53467805-53467843:+@junction:chr12:53467844-53468776:+	PCBP2	multimodal
isoform1=junction:chr1:25351694-25356792:+|isoform2=junction:chr1:25351694-25352881:+@exon:chr1:25352882-25352974:+@junction:chr1:25352975-25356792:+	TMEM50A	included
isoform1=junction:chr12:53669949-53676052:-|isoform2=junction:chr12:53672646-53676052:-@exon:chr12:53672576-53672645:-@junction:chr12:53669949-53672575:-	ATP5G2	included
isoform1=junction:chr12:54342288-54345459:+|isoform2=junction:chr12:54342288-54343224:+@exon:chr12:54343225-54343316:+@junction:chr12:54343317-54345459:+	COPZ1	included
isoform1=junction:chr12:54371097-54373972:-|isoform2=junction:chr12:54371716-54373972:-@exon:chr12:54371473-54371715:-@junction:chr12:54371097-54371472:-	ZNF385A	included
isoform1=junction:chr12:54854641-54856769:+|isoform2=junction:chr12:54854641-54855115:+@exon:chr12:54855116-54855157:+@junction:chr12:54855158-54856769:+	MUCL1	included
isoform1=junction:chr12:56116800-56117481:+|isoform2=junction:chr12:56116800-56117188:+@exon:chr12:56117189-56117211:+@junction:chr12:56117212-56117481:+	RPL41	included
isoform1=junction:chr12:56158712-56159586:+|isoform2=junction:chr12:56158712-56158901:+@novel_exon:chr12:56158902-56158920:+@junction:chr12:56158921-56159586:+	MYL6B	excluded
isoform1=junction:chr12:56158712-56159974:+|isoform2=junction:chr12:56158712-56159586:+@exon:chr12:56159587-56159730:+@junction:chr12:56159731-56159974:+	MYL6	included
isoform1=junction:chr12:56160321-56161386:+|isoform2=junction:chr12:56160321-56160625:+@exon:chr12:56160626-56160670:+@junction:chr12:56160671-56161386:+	MYL6	excluded
isoform1=junction:chr12:56314967-56315820:-|isoform2=junction:chr12:56315243-56315820:-@exon:chr12:56315130-56315242:-@junction:chr12:56314967-56315129:-	AC073896.1	included
isoform1=junction:chr12:56642581-56643402:-|isoform2=junction:chr12:56642832-56643402:-@exon:chr12:56642673-56642831:-@junction:chr12:56642581-56642672:-	ATP5B	included
isoform1=junction:chr12:56644956-56645836:-|isoform2=junction:chr12:56645354-56645836:-@exon:chr12:56645171-56645353:-@junction:chr12:56644956-56645170:-	ATP5B	included
isoform1=junction:chr12:56664801-56670274:-|isoform2=junction:chr12:56666267-56670274:-@exon:chr12:56666204-56666266:-@junction:chr12:56664801-56666203:-	PTGES3	included
isoform1=junction:chr12:56666267-56671748:-|isoform2=junction:chr12:56670365-56671748:-@exon:chr12:56670275-56670364:-@junction:chr12:56666267-56670274:-	PTGES3	included
isoform1=junction:chr12:57490380-57498156:+|isoform2=junction:chr12:57490380-57490537:+@exon:chr12:57490538-57490644:+@junction:chr12:57490645-57498156:+	MARS	included
isoform1=junction:chr12:57535846-57546027:-|isoform2=junction:chr12:57538525-57546027:-@exon:chr12:57538519-57538524:-@junction:chr12:57535846-57538518:-	DCTN2	excluded
isoform1=junction:chr12:57599212-57600323:+|isoform2=junction:chr12:57599212-57599399:+@exon:chr12:57599400-57599438:+@junction:chr12:57599439-57600323:+	PIP4K2C	multimodal
isoform1=junction:chr12:57751343-57752174:-|isoform2=junction:chr12:57751737-57752174:-@exon:chr12:57751500-57751736:-@junction:chr12:57751343-57751499:-	CDK4	included
isoform1=junction:chr12:57787163-57796176:+|isoform2=junction:chr12:57787163-57792985:+@exon:chr12:57792986-57793073:+@junction:chr12:57793074-57796176:+	TSFM	included
isoform1=junction:chr12:64721706-64728955:-|isoform2=junction:chr12:64723114-64728955:-@exon:chr12:64723006-64723113:-@junction:chr12:64721706-64723005:-	GNS	included
isoform1=junction:chr12:64747919-64759084:-|isoform2=junction:chr12:64752758-64759084:-@exon:chr12:64752698-64752757:-@junction:chr12:64747919-64752697:-	GNS	included
isoform1=junction:chr12:66138167-66145840:-|isoform2=junction:chr12:66138770-66145840:-@exon:chr12:66138724-66138769:-@junction:chr12:66138167-66138723:-	TMBIM4	included
isoform1=junction:chr12:6849199-6849564:-|isoform2=junction:chr12:6849430-6849564:-@exon:chr12:6849323-6849429:-@junction:chr12:6849199-6849322:-	CDCA3	multimodal
isoform1=junction:chr12:68611044-68650399:+|isoform2=junction:chr12:68611044-68648698:+@exon:chr12:68648699-68648781:+@junction:chr12:68648782-68650399:+	RAP1B	included
isoform1=junction:chr12:71880608-71893221:+|isoform2=junction:chr12:71880608-71884810:+@exon:chr12:71884811-71885021:+@junction:chr12:71885022-71893221:+	TBC1D15	included
isoform1=junction:chr12:75506400-75506781:-|isoform2=junction:chr12:75506610-75506781:-@exon:chr12:75506484-75506609:-@junction:chr12:75506400-75506483:-	KRR1	included
isoform1=junction:chr12:76068995-76084566:-|isoform2=junction:chr12:76074240-76084566:-@exon:chr12:76074203-76074239:-@junction:chr12:76068995-76074202:-	NAP1L1	included
isoform1=junction:chr1:28738339-28768928:+|isoform2=junction:chr1:28738339-28742402:+@exon:chr1:28742403-28743986:+@junction:chr1:28743987-28768928:+	YTHDF2	included
isoform1=junction:chr12:89349562-89351639:-|isoform2=junction:chr12:89351026-89351639:-@exon:chr12:89350588-89351025:-@junction:chr12:89349562-89350587:-	DUSP6	multimodal
isoform1=junction:chr1:29159487-29160374:-|isoform2=junction:chr1:29160059-29160374:-@exon:chr1:29159864-29160058:-@junction:chr1:29159487-29159863:-	SRSF4	excluded
isoform1=junction:chr12:94971621-95002738:-|isoform2=junction:chr12:94994258-95002738:-@exon:chr12:94994170-94994257:-@junction:chr12:94971621-94994169:-	NDUFA12	included
isoform1=junction:chr13:113501881-113510237:+|isoform2=junction:chr13:113501881-113503495:+@exon:chr13:113503496-113503588:+@junction:chr13:113503589-113510237:+	TMCO3	included
isoform1=junction:chr1:31319167-31338956:+|isoform2=junction:chr1:31319167-31337174:+@exon:chr1:31337175-31337275:+@junction:chr1:31337276-31338956:+	ZCCHC17	included
isoform1=junction:chr1:31908961-31911695:-|isoform2=junction:chr1:31910113-31911695:-@exon:chr1:31910038-31910112:-@junction:chr1:31908961-31910037:-	PTP4A2	included
isoform1=junction:chr1:31910113-31915894:-|isoform2=junction:chr1:31911827-31915894:-@exon:chr1:31911696-31911826:-@junction:chr1:31910113-31911695:-	PTP4A2	included
isoform1=junction:chr1:31911827-31918969:-|isoform2=junction:chr1:31915988-31918969:-@exon:chr1:31915895-31915987:-@junction:chr1:31911827-31915894:-	PTP4A2	included
isoform1=junction:chr1:32030423-32033187:+|isoform2=junction:chr1:32030423-32031523:+@exon:chr1:32031524-32031640:+@junction:chr1:32031641-32033187:+	KHDRBS1	included
isoform1=junction:chr1:32627545-32633644:-|isoform2=junction:chr1:32631880-32633644:-@exon:chr1:32631827-32631879:-@junction:chr1:32627545-32631826:-	ZBTB8OS	included
isoform1=junction:chr13:27253844-27255241:+|isoform2=junction:chr13:27253844-27254219:+@exon:chr13:27254220-27254281:+@junction:chr13:27254282-27255241:+	RPL21	included
isoform1=junction:chr13:27430622-27434138:+|isoform2=junction:chr13:27430622-27432730:+@exon:chr13:27432731-27432804:+@junction:chr13:27432805-27434138:+	GTF3A	included
isoform1=junction:chr13:27435035-27435432:+|isoform2=junction:chr13:27435035-27435132:+@exon:chr13:27435133-27435192:+@junction:chr13:27435193-27435432:+	GTF3A	included
isoform1=junction:chr13:36952600-36971976:-|isoform2=junction:chr13:36965727-36971976:-@exon:chr13:36965575-36965726:-@junction:chr13:36952600-36965574:-	ALG5	included
isoform1=junction:chr13:38354297-38359300:+|isoform2=junction:chr13:38354297-38358092:+@exon:chr13:38358093-38358132:+@junction:chr13:38358133-38359300:+	UFM1	included
isoform1=junction:chr13:43069004-43085767:+|isoform2=junction:chr13:43069004-43078611:+@exon:chr13:43078612-43078688:+@junction:chr13:43078689-43085767:+	DNAJC15	included
isoform1=junction:chr13:45338777-45339993:-|isoform2=junction:chr13:45339603-45339993:-@exon:chr13:45339497-45339602:-@junction:chr13:45338777-45339496:-	TPT1	included
isoform1=junction:chr13:45340185-45341041:-|isoform2=junction:chr13:45340786-45341041:-@exon:chr13:45340712-45340785:-@junction:chr13:45340185-45340711:-	TPT1	included
isoform1=junction:chr13:46777624-46781495:-|isoform2=junction:chr13:46780034-46781495:-@exon:chr13:46779935-46780033:-@junction:chr13:46777624-46779934:-	ESD	bimodal
isoform1=junction:chr13:52456608-52461057:+|isoform2=junction:chr13:52456608-52460898:+@exon:chr13:52460899-52460974:+@junction:chr13:52460975-52461057:+	CKAP2	included
isoform1=junction:chr13:52657623-52658398:+|isoform2=junction:chr13:52657623-52658098:+@exon:chr13:52658099-52658226:+@junction:chr13:52658227-52658398:+	SUGT1	excluded
isoform1=junction:chr1:35631345-35641341:-|isoform2=junction:chr1:35636433-35641341:-@exon:chr1:35636310-35636432:-@junction:chr1:35631345-35636309:-	PSMB2	included
isoform1=junction:chr13:72781004-72781604:-|isoform2=junction:chr13:72781357-72781604:-@exon:chr13:72781289-72781356:-@junction:chr13:72781004-72781288:-	DIS3	excluded
isoform1=junction:chr13:75569508-75594914:+|isoform2=junction:chr13:75569508-75589937:+@exon:chr13:75589938-75590129:+@junction:chr13:75590130-75594914:+	AL137782.1	excluded
isoform1=junction:chr13:75636727-75727028:+|isoform2=junction:chr13:75636727-75713181:+@exon:chr13:75713182-75713252:+@junction:chr13:75713253-75727028:+	LMO7	included
isoform1=junction:chr13:99555648-99562690:+|isoform2=junction:chr13:99555648-99559362:+@exon:chr13:99559363-99559534:+@junction:chr13:99559535-99562690:+	TM9SF2	included
isoform1=junction:chr1:40074184-40078559:-|isoform2=junction:chr1:40076914-40078559:-@exon:chr1:40076842-40076913:-@junction:chr1:40074184-40076841:-	PPT1	included
isoform1=junction:chr14:102348760-102355767:-|isoform2=junction:chr14:102350049-102355767:-@exon:chr14:102349919-102350048:-@junction:chr14:102348760-102349918:-	CINP	included
isoform1=junction:chr14:103729183-103732619:+|isoform2=junction:chr14:103729183-103729792:+@exon:chr14:103729793-103729846:+@junction:chr14:103729847-103732619:+	ZFYVE21	excluded
isoform1=junction:chr14:103913985-103921469:-|isoform2=junction:chr14:103915190-103921469:-@exon:chr14:103915066-103915189:-@junction:chr14:103913985-103915065:-	C14orf2	included
isoform1=junction:chr14:104753320-104756603:+|isoform2=junction:chr14:104753320-104755629:+@exon:chr14:104755630-104755824:+@junction:chr14:104755825-104756603:+	SIVA1	included
isoform1=junction:chr14:21234230-21269297:-|isoform2=junction:chr14:21263337-21269297:-@exon:chr14:21263311-21263336:-@junction:chr14:21234230-21263310:-	HNRNPC	included
isoform1=junction:chr14:21234230-21269297:-|isoform2=junction:chr14:21263830-21269297:-@exon:chr14:21263311-21263829:-@junction:chr14:21234230-21263310:-	HNRNPC	multimodal
isoform1=junction:chr14:21263337-21269297:-|isoform2=junction:chr14:21263830-21269297:-@exon:chr14:21263667-21263829:-@junction:chr14:21263337-21263666:-	HNRNPC	excluded
isoform1=junction:chr14:22575234-22588946:-|isoform2=junction:chr14:22580893-22588946:-@novel_exon:chr14:22580829-22580892:-@junction:chr14:22575234-22580828:-	DAD1	excluded
isoform1=junction:chr14:22830255-22834171:+|isoform2=junction:chr14:22830255-22833417:+@exon:chr14:22833418-22833482:+@junction:chr14:22833483-22834171:+	MRPL52	included
isoform1=junction:chr14:23026376-23033367:-|isoform2=junction:chr14:23027830-23033367:-@exon:chr14:23027745-23027829:-@junction:chr14:23026376-23027744:-	PSMB5	excluded
isoform1=junction:chr14:24164956-24165846:+|isoform2=junction:chr14:24164956-24165056:+@exon:chr14:24165057-24165183:+@junction:chr14:24165184-24165846:+	AL136295.5	excluded
isoform1=junction:chr14:24218432-24232249:-|isoform2=junction:chr14:24231738-24232249:-@exon:chr14:24231652-24231737:-@junction:chr14:24218432-24231651:-	NEDD8-MDP1	excluded
isoform1=junction:chr1:43365009-43365563:-|isoform2=junction:chr1:43365377-43365563:-@exon:chr1:43365186-43365376:-@junction:chr1:43365009-43365185:-	ELOVL1	included
isoform1=junction:chr14:34603472-34605595:-|isoform2=junction:chr14:34604269-34605595:-@exon:chr14:34604135-34604268:-@junction:chr14:34603472-34604134:-	SNX6	excluded
isoform1=junction:chr14:34605718-34609637:-|isoform2=junction:chr14:34608141-34609637:-@exon:chr14:34608030-34608140:-@junction:chr14:34605718-34608029:-	SNX6	included
isoform1=junction:chr14:35292553-35308913:+|isoform2=junction:chr14:35292553-35307993:+@exon:chr14:35307994-35308088:+@junction:chr14:35308089-35308913:+	PSMA6	included
isoform1=junction:chr14:35402664-35403149:-|isoform2=junction:chr14:35402860-35403149:-@exon:chr14:35402771-35402859:-@junction:chr14:35402664-35402770:-	NFKBIA	included
isoform1=junction:chr1:43975108-43976089:+|isoform2=junction:chr1:43975108-43975799:+@exon:chr1:43975800-43975848:+@junction:chr1:43975849-43976089:+	ATP6V0B	included
isoform1=junction:chr1:43976380-43976772:+|isoform2=junction:chr1:43976380-43976589:+@exon:chr1:43976590-43976659:+@junction:chr1:43976660-43976772:+	ATP6V0B	included
isoform1=junction:chr14:52718143-52718976:+|isoform2=junction:chr14:52718143-52718228:+@exon:chr14:52718229-52718352:+@junction:chr14:52718353-52718976:+	PSMC6	included
isoform1=junction:chr14:52721191-52723964:+|isoform2=junction:chr14:52721191-52723804:+@novel_exon:chr14:52723805-52723874:+@junction:chr14:52723875-52723964:+	PSMC6	excluded
isoform1=junction:chr14:54397078-54401523:+|isoform2=junction:chr14:54397078-54399893:+@exon:chr14:54399894-54399976:+@junction:chr14:54399977-54401523:+	CDKN3	included
isoform1=junction:chr14:54430405-54436368:-|isoform2=junction:chr14:54432221-54436368:-@exon:chr14:54432108-54432220:-@junction:chr14:54430405-54432107:-	CNIH1	included
isoform1=junction:chr14:55051804-55062617:+|isoform2=junction:chr14:55051804-55061679:+@exon:chr14:55061680-55061701:+@junction:chr14:55061702-55062617:+	MAPK1IP1L	multimodal
isoform1=junction:chr1:45511415-45514872:-|isoform2=junction:chr1:45514638-45514872:-@exon:chr1:45514507-45514637:-@junction:chr1:45511415-45514506:-	PRDX1	included
isoform1=junction:chr1:45551156-45566568:+|isoform2=junction:chr1:45551156-45561788:+@exon:chr1:45561789-45561878:+@junction:chr1:45561879-45566568:+	AKR1A1	included
isoform1=junction:chr1:45568178-45568926:+|isoform2=junction:chr1:45568178-45568484:+@exon:chr1:45568485-45568684:+@junction:chr1:45568685-45568926:+	AKR1A1	included
isoform1=junction:chr14:58215285-58223621:+|isoform2=junction:chr14:58215285-58219693:+@exon:chr14:58219694-58219729:+@junction:chr14:58219730-58223621:+	ACTR10	included
isoform1=junction:chr14:58247833-58257744:+|isoform2=junction:chr14:58247833-58252118:+@exon:chr14:58252119-58252242:+@junction:chr14:58252243-58257744:+	PSMA3	included
isoform1=junction:chr14:59498909-59503853:+|isoform2=junction:chr14:59498909-59501190:+@exon:chr14:59501191-59501267:+@junction:chr14:59501268-59503853:+	JKAMP	included
isoform1=junction:chr1:46309128-46310154:+|isoform2=junction:chr1:46309128-46309896:+@exon:chr1:46309897-46310044:+@junction:chr1:46310045-46310154:+	UQCRH	excluded
isoform1=junction:chr14:64924127-64932137:+|isoform2=junction:chr14:64924127-64926006:+@exon:chr14:64926007-64926080:+@junction:chr14:64926081-64932137:+	CHURC1	multimodal
isoform1=junction:chr14:64924127-64932137:+|isoform2=junction:chr14:64924127-64926009:+@exon:chr14:64926010-64926080:+@junction:chr14:64926081-64932137:+	CHURC1	included
isoform1=junction:chr14:65076664-65077912:-|isoform2=junction:chr14:65077429-65077912:-@exon:chr14:65077328-65077428:-@junction:chr14:65076664-65077327:-	MAX	multimodal
isoform1=junction:chr14:67651482-67656415:-|isoform2=junction:chr14:67653499-67656415:-@exon:chr14:67653437-67653498:-@junction:chr14:67651482-67653436:-	VTI1B	included
isoform1=junction:chr14:67685205-67691139:-|isoform2=junction:chr14:67690422-67691139:-@exon:chr14:67690212-67690421:-@junction:chr14:67685205-67690211:-	RDH11	included
isoform1=junction:chr14:67692594-67695629:-|isoform2=junction:chr14:67693053-67695629:-@exon:chr14:67692934-67693052:-@junction:chr14:67692594-67692933:-	RDH11	included
isoform1=junction:chr14:68878524-68879961:-@exon:chr14:68878458-68878523:-@junction:chr14:68877241-68878457:-|isoform2=junction:chr14:68879070-68879961:-@exon:chr14:68878989-68879069:-@junction:chr14:68877241-68878988:-	ACTN1	included
isoform1=junction:chr14:69768675-69769181:+|isoform2=junction:chr14:69768675-69768797:+@exon:chr14:69768798-69768896:+@junction:chr14:69768897-69769181:+	SRSF5	included
isoform1=junction:chr14:70329237-70359518:-|isoform2=junction:chr14:70342730-70359518:-@exon:chr14:70342658-70342729:-@junction:chr14:70329237-70342657:-	COX16	included
isoform1=junction:chr14:73959225-73961172:+|isoform2=junction:chr14:73959225-73959414:+@exon:chr14:73959415-73959522:+@junction:chr14:73959523-73961172:+	COQ6	included
isoform1=junction:chr14:74480780-74486328:-|isoform2=junction:chr14:74484588-74486328:-@exon:chr14:74484415-74484587:-@junction:chr14:74480780-74484414:-	NPC2	included
isoform1=junction:chr14:77708209-77710837:+|isoform2=junction:chr14:77708209-77710554:+@exon:chr14:77710555-77710665:+@junction:chr14:77710666-77710837:+	SLIRP	excluded
isoform1=junction:chr14:90397234-90400064:+|isoform2=junction:chr14:90397234-90398451:+@novel_exon:chr14:90398452-90398488:+@junction:chr14:90398489-90400064:+	CALM1	excluded
isoform1=junction:chr14:94110798-94111624:+|isoform2=junction:chr14:94110798-94110925:+@exon:chr14:94110926-94110978:+@junction:chr14:94110979-94111624:+	IFI27	excluded
isoform1=junction:chr14:94110798-94111658:+|isoform2=junction:chr14:94110798-94110925:+@exon:chr14:94110926-94110978:+@junction:chr14:94110979-94111658:+	IFI27	excluded
isoform1=junction:chr14:94110798-94114850:+|isoform2=junction:chr14:94110798-94111624:+@exon:chr14:94111625-94111773:+@junction:chr14:94111774-94114850:+	IFI27	included
isoform1=junction:chr14:94110798-94114850:+|isoform2=junction:chr14:94110798-94111658:+@exon:chr14:94111659-94111773:+@junction:chr14:94111774-94114850:+	IFI27	included
isoform1=junction:chr14:94111774-94115780:+|isoform2=junction:chr14:94111774-94114850:+@exon:chr14:94114851-94114880:+@junction:chr14:94114881-94115780:+	IFI27	included
isoform1=junction:chr14:95221775-95223759:-|isoform2=junction:chr14:95222600-95223759:-@exon:chr14:95222403-95222599:-@junction:chr14:95221775-95222402:-	CLMN	excluded
isoform1=junction:chr15:34225201-34227692:+|isoform2=junction:chr15:34225201-34225535:+@exon:chr15:34225536-34225650:+@junction:chr15:34225651-34227692:+	EMC4	included
isoform1=junction:chr15:34227847-34229752:+|isoform2=junction:chr15:34227847-34228428:+@exon:chr15:34228429-34228589:+@junction:chr15:34228590-34229752:+	EMC4	included
isoform1=junction:chr15:39588219-39588958:+|isoform2=junction:chr15:39588219-39588525:+@exon:chr15:39588526-39588699:+@junction:chr15:39588700-39588958:+	THBS1	included
isoform1=junction:chr1:54043526-54047266:-|isoform2=junction:chr1:54045787-54047266:-@exon:chr1:54045692-54045786:-@junction:chr1:54043526-54045691:-	TMEM59	included
isoform1=junction:chr15:40853930-40854396:+|isoform2=junction:chr15:40853930-40854059:+@exon:chr15:40854060-40854086:+@junction:chr15:40854087-40854396:+	SPINT1	included
isoform1=junction:chr15:41231450-41256909:+|isoform2=junction:chr15:41231450-41243666:+@exon:chr15:41243667-41243739:+@junction:chr15:41243740-41256909:+	CHP1	included
isoform1=junction:chr15:41256991-41270556:+|isoform2=junction:chr15:41256991-41262755:+@exon:chr15:41262756-41262883:+@junction:chr15:41262884-41270556:+	CHP1	included
isoform1=junction:chr15:41262884-41270556:+|isoform2=junction:chr15:41262884-41264164:+@exon:chr15:41264165-41264235:+@junction:chr15:41264236-41270556:+	CHP1	excluded
isoform1=junction:chr15:42231261-42233212:-@exon:chr15:42231192-42231260:-@junction:chr15:42228821-42231191:-|isoform2=junction:chr15:42231916-42233212:-@exon:chr15:42231844-42231915:-@junction:chr15:42228821-42231843:-	TMEM87A	multimodal
isoform1=junction:chr15:42268033-42273254:-|isoform2=junction:chr15:42272124-42273254:-@exon:chr15:42272063-42272123:-@junction:chr15:42268033-42272062:-	TMEM87A	multimodal
isoform1=junction:chr15:43189281-43190324:+|isoform2=junction:chr15:43189281-43190054:+@exon:chr15:43190055-43190151:+@junction:chr15:43190152-43190324:+	CCNDBP1	bimodal
isoform1=junction:chr15:43746707-43756648:+|isoform2=junction:chr15:43746707-43753823:+@exon:chr15:43753824-43753902:+@junction:chr15:43753903-43756648:+	PDIA3	included
isoform1=junction:chr15:43761532-43765449:+|isoform2=junction:chr15:43761532-43763076:+@exon:chr15:43763077-43763206:+@junction:chr15:43763207-43765449:+	PDIA3	included
isoform1=junction:chr15:50301369-50303965:-|isoform2=junction:chr15:50303124-50303965:-@exon:chr15:50302929-50303123:-@junction:chr15:50301369-50302928:-	GABPB1	included
isoform1=junction:chr15:50707875-50722123:-|isoform2=junction:chr15:50720101-50722123:-@exon:chr15:50719940-50720100:-@junction:chr15:50707875-50719939:-	SPPL2A	included
isoform1=junction:chr15:59669363-59672636:-|isoform2=junction:chr15:59671315-59672636:-@exon:chr15:59671183-59671314:-@junction:chr15:59669363-59671182:-	BNIP2	included
isoform1=junction:chr15:59678088-59679591:-|isoform2=junction:chr15:59678835-59679591:-@exon:chr15:59678748-59678834:-@junction:chr15:59678088-59678747:-	BNIP2	excluded
isoform1=junction:chr15:60347690-60351192:-|isoform2=junction:chr15:60349198-60351192:-@exon:chr15:60349075-60349197:-@junction:chr15:60347690-60349074:-	ANXA2	included
isoform1=junction:chr15:60364524-60386027:-|isoform2=junction:chr15:60382442-60386027:-@exon:chr15:60382342-60382441:-@junction:chr15:60364524-60382341:-	ANXA2	included
isoform1=junction:chr15:60386087-60397257:-|isoform2=junction:chr15:60396428-60397257:-@exon:chr15:60396373-60396427:-@junction:chr15:60386087-60396372:-	ANXA2	excluded
isoform1=junction:chr15:60386087-60397942:-|isoform2=junction:chr15:60396428-60397942:-@exon:chr15:60396373-60396427:-@junction:chr15:60386087-60396372:-	ANXA2	excluded
isoform1=junction:chr15:60386087-60397942:-|isoform2=junction:chr15:60397339-60397942:-@exon:chr15:60397258-60397338:-@junction:chr15:60386087-60397257:-	ANXA2	excluded
isoform1=junction:chr15:63042944-63044026:+@exon:chr15:63044027-63044152:+@junction:chr15:63044153-63056984:+|isoform2=junction:chr15:63042944-63043705:+@exon:chr15:63043706-63043831:+@junction:chr15:63043832-63056984:+	TPM1	excluded
isoform1=junction:chr15:63061274-63062214:+|isoform2=junction:chr15:63061274-63061712:+@exon:chr15:63061713-63061788:+@junction:chr15:63061789-63062214:+	TPM1	excluded
isoform1=junction:chr15:63504831-63532646:+|isoform2=junction:chr15:63504831-63529013:+@exon:chr15:63529014-63529166:+@junction:chr15:63529167-63532646:+	USP3	excluded
isoform1=junction:chr15:64075538-64088686:-|isoform2=junction:chr15:64081152-64088686:-@exon:chr15:64081102-64081151:-@junction:chr15:64075538-64081101:-	FAM96A	multimodal
isoform1=junction:chr15:64366076-64380957:-|isoform2=junction:chr15:64376906-64380957:-@exon:chr15:64376743-64376905:-@junction:chr15:64366076-64376742:-	AC087632.1	included
isoform1=junction:chr15:65554961-65558679:+|isoform2=junction:chr15:65554961-65556738:+@exon:chr15:65556739-65556903:+@junction:chr15:65556904-65558679:+	HACD3	included
isoform1=junction:chr15:69421753-69422325:+|isoform2=junction:chr15:69421753-69421991:+@exon:chr15:69421992-69422128:+@junction:chr15:69422129-69422325:+	KIF23	multimodal
isoform1=junction:chr15:69453021-69455169:+|isoform2=junction:chr15:69453021-69453646:+@exon:chr15:69453647-69453721:+@junction:chr15:69453722-69455169:+	RPLP1	included
isoform1=junction:chr15:72202621-72206727:-@exon:chr15:72202454-72202620:-@junction:chr15:72200656-72202453:-|isoform2=junction:chr15:72203189-72206727:-@exon:chr15:72203022-72203188:-@junction:chr15:72200656-72203021:-	PKM	excluded
isoform1=junction:chr15:72353179-72355558:-|isoform2=junction:chr15:72353738-72355558:-@exon:chr15:72353691-72353737:-@junction:chr15:72353179-72353690:-	HEXA	included
isoform1=junction:chr15:74920443-74926765:-|isoform2=junction:chr15:74923771-74926765:-@exon:chr15:74923648-74923770:-@junction:chr15:74920443-74923647:-	COX5A	included
isoform1=junction:chr15:74923771-74929115:-|isoform2=junction:chr15:74926888-74929115:-@exon:chr15:74926766-74926887:-@junction:chr15:74923771-74926765:-	COX5A	included
isoform1=junction:chr15:74926888-74937914:-|isoform2=junction:chr15:74929233-74937914:-@exon:chr15:74929116-74929232:-@junction:chr15:74926888-74929115:-	COX5A	included
isoform1=junction:chr15:75338134-75338645:+|isoform2=junction:chr15:75338134-75338354:+@exon:chr15:75338355-75338420:+@junction:chr15:75338421-75338645:+	COMMD4	included
isoform1=junction:chr15:75339345-75339964:+|isoform2=junction:chr15:75339345-75339701:+@exon:chr15:75339702-75339878:+@junction:chr15:75339879-75339964:+	COMMD4	included
isoform1=junction:chr15:76292514-76295590:-|isoform2=junction:chr15:76292701-76295590:-@exon:chr15:76292619-76292700:-@junction:chr15:76292514-76292618:-	ETFA	included
isoform1=junction:chr15:76292701-76311349:-|isoform2=junction:chr15:76295738-76311349:-@exon:chr15:76295591-76295737:-@junction:chr15:76292701-76295590:-	ETFA	included
isoform1=junction:chr15:78289713-78292615:-|isoform2=junction:chr15:78290100-78292615:-@exon:chr15:78289951-78290099:-@junction:chr15:78289713-78289950:-	WDR61	included
isoform1=junction:chr15:78542220-78544189:+|isoform2=junction:chr15:78542220-78542482:+@exon:chr15:78542483-78542645:+@junction:chr15:78542646-78544189:+	PSMA4	included
isoform1=junction:chr15:78545765-78548789:+|isoform2=junction:chr15:78545765-78546574:+@exon:chr15:78546575-78546698:+@junction:chr15:78546699-78548789:+	PSMA4	included
isoform1=junction:chr15:83041926-83056388:-|isoform2=junction:chr15:83050179-83056388:-@exon:chr15:83050073-83050178:-@junction:chr15:83041926-83050072:-	BTBD1	bimodal
isoform1=junction:chr15:84670783-84687624:-|isoform2=junction:chr15:84680833-84687624:-@exon:chr15:84680713-84680832:-@junction:chr15:84670783-84680712:-	SEC11A	included
isoform1=junction:chr15:88475240-88477871:+|isoform2=junction:chr15:88475240-88476988:+@exon:chr15:88476989-88477054:+@junction:chr15:88477055-88477871:+	MRPS11	included
isoform1=junction:chr15:88639595-88655414:+|isoform2=junction:chr15:88639595-88652109:+@exon:chr15:88652110-88652310:+@junction:chr15:88652311-88655414:+	ISG20	included
isoform1=junction:chr15:90981034-90981747:-|isoform2=junction:chr15:90981670-90981747:-@exon:chr15:90981499-90981669:-@junction:chr15:90981034-90981498:-	PRC1	included
isoform1=junction:chr15:90984141-90994406:-|isoform2=junction:chr15:90984826-90994406:-@exon:chr15:90984693-90984825:-@junction:chr15:90984141-90984692:-	PRC1	included
isoform1=junction:chr16:11688446-11698124:-|isoform2=junction:chr16:11692083-11698124:-@exon:chr16:11691290-11692082:-@junction:chr16:11688446-11691289:-	TXNDC11	included
isoform1=junction:chr16:14998406-15004186:+|isoform2=junction:chr16:14998406-15001775:+@exon:chr16:15001776-15001856:+@junction:chr16:15001857-15004186:+	PDXDC1	included
isoform1=junction:chr16:1962657-1963148:-|isoform2=junction:chr16:1962910-1963148:-@exon:chr16:1962736-1962909:-@junction:chr16:1962657-1962735:-	RPS2	included
isoform1=junction:chr16:21161279-21170436:+|isoform2=junction:chr16:21161279-21166839:+@exon:chr16:21166840-21166911:+@junction:chr16:21166912-21170436:+	TMEM159	excluded
isoform1=junction:chr16:21170606-21179474:+|isoform2=junction:chr16:21170606-21174009:+@exon:chr16:21174010-21174148:+@junction:chr16:21174149-21179474:+	TMEM159	included
isoform1=junction:chr1:6232120-6234885:-|isoform2=junction:chr1:6233644-6234885:-@exon:chr1:6233474-6233643:-@junction:chr1:6232120-6233473:-	ICMT	included
isoform1=junction:chr1:62442300-62444737:+|isoform2=junction:chr1:62442300-62443158:+@exon:chr1:62443159-62443319:+@junction:chr1:62443320-62444737:+	USP1	included
isoform1=junction:chr16:2772103-2776992:-|isoform2=junction:chr16:2775557-2776992:-@exon:chr16:2775451-2775556:-@junction:chr16:2772103-2775450:-	ELOB	included
isoform1=junction:chr16:30064506-30067233:+|isoform2=junction:chr16:30064506-30066884:+@exon:chr16:30066885-30067038:+@junction:chr16:30067039-30067233:+	ALDOA	excluded
isoform1=junction:chr16:30065928-30067233:+|isoform2=junction:chr16:30065928-30066884:+@exon:chr16:30066885-30067038:+@junction:chr16:30067039-30067233:+	ALDOA	excluded
isoform1=junction:chr16:30082535-30083393:+|isoform2=junction:chr16:30082535-30082745:+@exon:chr16:30082746-30082847:+@junction:chr16:30082848-30083393:+	PPP4C	included
isoform1=junction:chr16:3020492-3021554:+|isoform2=junction:chr16:3020492-3021214:+@exon:chr16:3021215-3021319:+@junction:chr16:3021320-3021554:+	TNFRSF12A	included
isoform1=junction:chr16:31091343-31094556:-|isoform2=junction:chr16:31093422-31094556:-@exon:chr16:31093312-31093421:-@junction:chr16:31091343-31093311:-	AC135050.2	included
isoform1=junction:chr16:31185180-31188324:+|isoform2=junction:chr16:31185180-31186801:+@exon:chr16:31186802-31186836:+@junction:chr16:31186837-31188324:+	FUS	included
isoform1=junction:chr16:31201842-31202416:-|isoform2=junction:chr16:31202204-31202416:-@exon:chr16:31202147-31202203:-@junction:chr16:31201842-31202146:-	PYCARD	included
isoform1=junction:chr16:56625880-56626879:+|isoform2=junction:chr16:56625880-56626465:+@exon:chr16:56626466-56626531:+@junction:chr16:56626532-56626879:+	MT1E	included
isoform1=junction:chr16:56935313-56936686:+|isoform2=junction:chr16:56935313-56935400:+@exon:chr16:56935401-56935475:+@junction:chr16:56935476-56936686:+	HERPUD1	included
isoform1=junction:chr16:634798-635280:-|isoform2=junction:chr16:634957-635280:-@exon:chr16:634889-634956:-@junction:chr16:634798-634888:-	METTL26	multimodal
isoform1=junction:chr16:635341-636093:-|isoform2=junction:chr16:635775-636093:-@exon:chr16:635612-635774:-@junction:chr16:635341-635611:-	METTL26	included
isoform1=junction:chr16:66552794-66563121:+|isoform2=junction:chr16:66552794-66558189:+@exon:chr16:66558190-66558348:+@junction:chr16:66558349-66563121:+	CKLF	multimodal
isoform1=junction:chr16:66558349-66565885:+|isoform2=junction:chr16:66558349-66563121:+@exon:chr16:66563122-66563217:+@junction:chr16:66563218-66565885:+	CKLF	multimodal
isoform1=junction:chr16:67444707-67453543:-|isoform2=junction:chr16:67452361-67453543:-@exon:chr16:67452238-67452360:-@junction:chr16:67444707-67452237:-	ATP6V0D1	excluded
isoform1=junction:chr16:68815760-68822000:+|isoform2=junction:chr16:68815760-68819279:+@exon:chr16:68819280-68819425:+@junction:chr16:68819426-68822000:+	CDH1	included
isoform1=junction:chr16:69711282-69714963:-|isoform2=junction:chr16:69713130-69714963:-@exon:chr16:69713028-69713129:-@junction:chr16:69711282-69713027:-	NQO1	included
isoform1=junction:chr16:69713130-69718122:-|isoform2=junction:chr16:69715078-69718122:-@exon:chr16:69714964-69715077:-@junction:chr16:69713130-69714963:-	NQO1	included
isoform1=junction:chr16:75566908-75577278:+|isoform2=junction:chr16:75566908-75568036:+@exon:chr16:75568037-75568209:+@junction:chr16:75568210-75577278:+	GABARAPL2	included
isoform1=junction:chr16:85779868-85781210:-|isoform2=junction:chr16:85780474-85781210:-@exon:chr16:85780379-85780473:-@junction:chr16:85779868-85780378:-	EMC8	multimodal
isoform1=junction:chr16:89646715-89647202:-|isoform2=junction:chr16:89647072-89647202:-@novel_exon:chr16:89647035-89647071:-@junction:chr16:89646715-89647034:-	CHMP1A	excluded
isoform1=junction:chr16:89873860-89883350:+|isoform2=junction:chr16:89873860-89878460:+@exon:chr16:89878461-89878627:+@junction:chr16:89878628-89883350:+	TCF25	excluded
isoform1=junction:chr1:70228556-70232267:+|isoform2=junction:chr1:70228556-70231858:+@exon:chr1:70231859-70231975:+@junction:chr1:70231976-70232267:+	SRSF11	excluded
isoform1=junction:chr17:16439415-16440184:+@exon:chr17:16440185-16440253:+@junction:chr17:16440254-16441073:+|isoform2=junction:chr17:16439415-16439527:+@exon:chr17:16439528-16439703:+@junction:chr17:16439704-16441073:+	LRRC75A-AS1	excluded
isoform1=junction:chr17:16439415-16440184:+@exon:chr17:16440185-16440253:+@junction:chr17:16440254-16441073:+|isoform2=junction:chr17:16439415-16439580:+@exon:chr17:16439581-16439703:+@junction:chr17:16439704-16441073:+	LRRC75A-AS1	excluded
isoform1=junction:chr17:16439415-16440184:+@exon:chr17:16440185-16440253:+@junction:chr17:16440254-16441073:+|isoform2=junction:chr17:16439415-16439659:+@exon:chr17:16439660-16439703:+@junction:chr17:16439704-16441073:+	LRRC75A-AS1	excluded
isoform1=junction:chr17:16439415-16440184:+|isoform2=junction:chr17:16439415-16439527:+@exon:chr17:16439528-16439703:+@junction:chr17:16439704-16440184:+	LRRC75A-AS1	multimodal
isoform1=junction:chr17:16439415-16440184:+|isoform2=junction:chr17:16439415-16439580:+@exon:chr17:16439581-16439703:+@junction:chr17:16439704-16440184:+	LRRC75A-AS1	multimodal
isoform1=junction:chr17:16439415-16440184:+|isoform2=junction:chr17:16439415-16439659:+@exon:chr17:16439660-16439703:+@junction:chr17:16439704-16440184:+	LRRC75A-AS1	multimodal
isoform1=junction:chr17:16439704-16441073:+|isoform2=junction:chr17:16439704-16440184:+@exon:chr17:16440185-16440253:+@junction:chr17:16440254-16441073:+	LRRC75A-AS1	included
isoform1=junction:chr17:16440254-16441367:+|isoform2=junction:chr17:16440254-16441073:+@exon:chr17:16441074-16441130:+@junction:chr17:16441131-16441367:+	LRRC75A-AS1	included
isoform1=junction:chr17:17271009-17281131:-|isoform2=junction:chr17:17276165-17281131:-@exon:chr17:17276035-17276164:-@junction:chr17:17271009-17276034:-	COPS3	included
isoform1=junction:chr17:21021227-21042664:-|isoform2=junction:chr17:21028675-21042664:-@exon:chr17:21028542-21028674:-@junction:chr17:21021227-21028541:-	USP22	included
isoform1=junction:chr17:21302260-21304425:+|isoform2=junction:chr17:21302260-21303182:+@exon:chr17:21303183-21303234:+@junction:chr17:21303235-21304425:+	MAP2K3	included
isoform1=junction:chr17:27294436-27303366:+|isoform2=junction:chr17:27294436-27301787:+@exon:chr17:27301788-27301956:+@junction:chr17:27301957-27303366:+	WSB1	included
isoform1=junction:chr17:27309273-27311508:+|isoform2=junction:chr17:27309273-27310060:+@exon:chr17:27310061-27310174:+@junction:chr17:27310175-27311508:+	WSB1	included
isoform1=junction:chr17:30984761-30997241:+|isoform2=junction:chr17:30984761-30987943:+@exon:chr17:30987944-30988106:+@junction:chr17:30988107-30997241:+	RNF135	multimodal
isoform1=junction:chr17:32365488-32367771:+|isoform2=junction:chr17:32365488-32366664:+@exon:chr17:32366665-32366757:+@junction:chr17:32366758-32367771:+	ZNF207	multimodal
isoform1=junction:chr17:35872465-35878527:-|isoform2=junction:chr17:35875643-35878527:-@exon:chr17:35875561-35875642:-@junction:chr17:35872465-35875560:-	CCL5	excluded
isoform1=junction:chr17:3720403-3723687:-|isoform2=junction:chr17:3723384-3723687:-@exon:chr17:3723288-3723383:-@junction:chr17:3720403-3723287:-	ITGAE	excluded
isoform1=junction:chr17:38755991-38762410:+|isoform2=junction:chr17:38755991-38760430:+@exon:chr17:38760431-38760608:+@junction:chr17:38760609-38762410:+	PSMB3	included
isoform1=junction:chr17:39674055-39684596:-|isoform2=junction:chr17:39674680-39684596:-@exon:chr17:39674617-39674679:-@junction:chr17:39674055-39674616:-	PGAP3	included
isoform1=junction:chr17:40928608-40931372:-|isoform2=junction:chr17:40930097-40931372:-@exon:chr17:40929940-40930096:-@junction:chr17:40928608-40929939:-	KRT23	included
isoform1=junction:chr17:41524541-41525190:-|isoform2=junction:chr17:41525000-41525190:-@exon:chr17:41524843-41524999:-@junction:chr17:41524541-41524842:-	KRT19	included
isoform1=junction:chr17:41827627-41830800:-|isoform2=junction:chr17:41828953-41830800:-@exon:chr17:41828790-41828952:-@junction:chr17:41827627-41828789:-	NT5C3B	included
isoform1=junction:chr17:44322529-44323283:-|isoform2=junction:chr17:44322853-44323283:-@exon:chr17:44322808-44322852:-@junction:chr17:44322529-44322807:-	SLC25A39	included
isoform1=junction:chr17:44378711-44380001:-|isoform2=junction:chr17:44379815-44380001:-@exon:chr17:44379689-44379814:-@junction:chr17:44378711-44379688:-	ITGA2B	included
isoform1=junction:chr17:47274505-47284442:+|isoform2=junction:chr17:47274505-47283353:+@exon:chr17:47283354-47283549:+@junction:chr17:47283550-47284442:+	AC068234.1	included
isoform1=junction:chr17:49705897-49706964:-|isoform2=junction:chr17:49706335-49706964:-@exon:chr17:49706204-49706334:-@junction:chr17:49705897-49706203:-	SLC35B1	included
isoform1=junction:chr17:50070931-50071985:+|isoform2=junction:chr17:50070931-50071310:+@exon:chr17:50071311-50071518:+@junction:chr17:50071519-50071985:+	ITGA3	included
isoform1=junction:chr17:51168344-51171486:+|isoform2=junction:chr17:51168344-51169936:+@exon:chr17:51169937-51170049:+@junction:chr17:51170050-51171486:+	NME1-NME2	included
isoform1=junction:chr17:58347242-58351401:-|isoform2=junction:chr17:58347585-58351401:-@exon:chr17:58347529-58347584:-@junction:chr17:58347242-58347528:-	SUPT4H1	included
isoform1=junction:chr17:64500327-64502009:-|isoform2=junction:chr17:64500774-64502009:-@exon:chr17:64500549-64500773:-@junction:chr17:64500327-64500548:-	DDX5	included
isoform1=junction:chr17:68433576-68435619:-|isoform2=junction:chr17:68434627-68435619:-@exon:chr17:68434556-68434626:-@junction:chr17:68433576-68434555:-	WIPI1	multimodal
isoform1=junction:chr17:7012762-7013665:+|isoform2=junction:chr17:7012762-7013318:+@exon:chr17:7013319-7013516:+@junction:chr17:7013517-7013665:+	RNASEK	excluded
isoform1=junction:chr17:7224070-7224320:+|isoform2=junction:chr17:7224070-7224145:+@exon:chr17:7224146-7224243:+@junction:chr17:7224244-7224320:+	ACADVL	included
isoform1=junction:chr17:75039272-75042180:-|isoform2=junction:chr17:75040164-75042180:-@exon:chr17:75040092-75040163:-@junction:chr17:75039272-75040091:-	ATP5H	included
isoform1=junction:chr17:75321828-75332699:-|isoform2=junction:chr17:75326021-75332699:-@exon:chr17:75325898-75326020:-@junction:chr17:75321828-75325897:-	GRB2	included
isoform1=junction:chr17:75668626-75693439:+|isoform2=junction:chr17:75668626-75671815:+@exon:chr17:75671816-75671863:+@junction:chr17:75671864-75693439:+	SAP30BP	included
isoform1=junction:chr17:7577917-7578341:+|isoform2=junction:chr17:7577917-7578164:+@exon:chr17:7578165-7578244:+@junction:chr17:7578245-7578341:+	SENP3-EIF4A1	included
isoform1=junction:chr17:76735159-76736153:-|isoform2=junction:chr17:76735876-76736153:-@exon:chr17:76735772-76735875:-@junction:chr17:76735159-76735771:-	SRSF2	excluded
isoform1=junction:chr17:78171055-78171738:+|isoform2=junction:chr17:78171055-78171509:+@exon:chr17:78171510-78171649:+@junction:chr17:78171650-78171738:+	SYNGR2	included
isoform1=junction:chr17:78175619-78185054:-|isoform2=junction:chr17:78182683-78185054:-@exon:chr17:78182589-78182682:-@junction:chr17:78175619-78182588:-	TK1	included
isoform1=junction:chr17:78214790-78223464:+|isoform2=junction:chr17:78214790-78216663:+@exon:chr17:78216664-78216781:+@junction:chr17:78216782-78223464:+	BIRC5	included
isoform1=junction:chr17:80101626-80104554:+|isoform2=junction:chr17:80101626-80101810:+@exon:chr17:80101811-80101890:+@junction:chr17:80101891-80104554:+	GAA	included
isoform1=junction:chr17:80139163-80140007:-|isoform2=junction:chr17:80139751-80140007:-@exon:chr17:80139670-80139750:-@junction:chr17:80139163-80139669:-	EIF4A3	included
isoform1=junction:chr17:81893615-81899919:+|isoform2=junction:chr17:81893615-81894466:+@exon:chr17:81894467-81894586:+@junction:chr17:81894587-81899919:+	ANAPC11	included
isoform1=junction:chr17:81933377-81934652:-|isoform2=junction:chr17:81934490-81934652:-@exon:chr17:81934326-81934489:-@junction:chr17:81933377-81934325:-	PYCR1	included
isoform1=junction:chr17:82019382-82019857:-|isoform2=junction:chr17:82019695-82019857:-@exon:chr17:82019641-82019694:-@junction:chr17:82019382-82019640:-	CENPX	multimodal
isoform1=junction:chr17:82472699-82478799:+|isoform2=junction:chr17:82472699-82478570:+@exon:chr17:82478571-82478667:+@junction:chr17:82478668-82478799:+	NARF	excluded
isoform1=junction:chr1:78649906-78654242:+|isoform2=junction:chr1:78649906-78650185:+@exon:chr1:78650186-78650652:+@junction:chr1:78650653-78654242:+	IFI44	multimodal
isoform1=junction:chr18:12308350-12310942:+|isoform2=junction:chr18:12308350-12308686:+@exon:chr18:12308687-12308795:+@junction:chr18:12308796-12310942:+	TUBB6	included
isoform1=junction:chr18:3247910-3253232:+|isoform2=junction:chr18:3247910-3249360:+@exon:chr18:3249361-3249443:+@junction:chr18:3249444-3253232:+	MYL12A	excluded
isoform1=junction:chr1:84498549-84506010:-|isoform2=junction:chr1:84501971-84506010:-@exon:chr1:84501826-84501970:-@junction:chr1:84498549-84501825:-	GNG5	included
isoform1=junction:chr18:49490928-49491531:-|isoform2=junction:chr18:49491446-49491531:-@exon:chr18:49491405-49491445:-@junction:chr18:49490928-49491404:-	RPL17	included
isoform1=junction:chr18:49491585-49492457:-|isoform2=junction:chr18:49491834-49492457:-@exon:chr18:49491736-49491833:-@junction:chr18:49491585-49491735:-	RPL17	excluded
isoform1=junction:chr18:662321-670691:+|isoform2=junction:chr18:662321-669071:+@exon:chr18:669072-669173:+@junction:chr18:669174-670691:+	TYMS	included
isoform1=junction:chr1:86863606-86880661:-|isoform2=junction:chr1:86868103-86880661:-@exon:chr1:86868053-86868102:-@junction:chr1:86863606-86868052:-	SELENOF	included
isoform1=junction:chr18:79973857-79988239:-|isoform2=junction:chr18:79977702-79988239:-@exon:chr18:79977598-79977701:-@junction:chr18:79973857-79977597:-	TXNL4A	included
isoform1=junction:chr18:79977702-79988239:-|isoform2=junction:chr18:79986751-79988239:-@exon:chr18:79986602-79986750:-@junction:chr18:79977702-79986601:-	TXNL4A	bimodal
isoform1=junction:chr1:8871987-8878579:-|isoform2=junction:chr1:8874918-8878579:-@exon:chr1:8874824-8874917:-@junction:chr1:8871987-8874823:-	ENO1	included
isoform1=junction:chr18:9937067-9950394:+|isoform2=junction:chr18:9937067-9944923:+@exon:chr18:9944924-9945058:+@junction:chr18:9945059-9950394:+	VAPA	excluded
isoform1=junction:chr19:10574493-10577197:-|isoform2=junction:chr19:10575030-10577197:-@exon:chr19:10574904-10575029:-@junction:chr19:10574493-10574903:-	AP1M2	included
isoform1=junction:chr19:10679928-10681018:+|isoform2=junction:chr19:10679928-10680345:+@exon:chr19:10680346-10680443:+@junction:chr19:10680444-10681018:+	ILF3	included
isoform1=junction:chr19:1105810-1106399:+|isoform2=junction:chr19:1105810-1106241:+@exon:chr19:1106242-1106266:+@junction:chr19:1106267-1106399:+	GPX4	included
isoform1=junction:chr19:11102787-11106564:+|isoform2=junction:chr19:11102787-11105219:+@exon:chr19:11105220-11105600:+@junction:chr19:11105601-11106564:+	LDLR	multimodal
isoform1=junction:chr19:11116213-11120091:+|isoform2=junction:chr19:11116213-11116858:+@exon:chr19:11116859-11116998:+@junction:chr19:11116999-11120091:+	LDLR	included
isoform1=junction:chr19:12676143-12677290:-|isoform2=junction:chr19:12677212-12677290:-@exon:chr19:12677108-12677211:-@junction:chr19:12676143-12677107:-	DHPS	included
isoform1=junction:chr19:1438893-1440018:+|isoform2=junction:chr19:1438893-1439715:+@exon:chr19:1439716-1439826:+@junction:chr19:1439827-1440018:+	RPS15	excluded
isoform1=junction:chr19:14410335-14410988:-|isoform2=junction:chr19:14410606-14410988:-@exon:chr19:14410421-14410605:-@junction:chr19:14410335-14410420:-	DDX39A	excluded
isoform1=junction:chr19:14410335-14410988:-|isoform2=junction:chr19:14410606-14410988:-@exon:chr19:14410548-14410605:-@junction:chr19:14410335-14410547:-	DDX39A	excluded
isoform1=junction:chr19:1599561-1605359:-|isoform2=junction:chr19:1602427-1605359:-@novel_exon:chr19:1602331-1602426:-@junction:chr19:1599561-1602330:-	AC005943.1	excluded
isoform1=junction:chr19:16647262-16659394:-|isoform2=junction:chr19:16654126-16659394:-@exon:chr19:16654035-16654125:-@junction:chr19:16647262-16654034:-	AC008764.4	multimodal
isoform1=junction:chr19:18900450-18904770:-|isoform2=junction:chr19:18903424-18904770:-@exon:chr19:18903268-18903423:-@junction:chr19:18900450-18903267:-	COPE	included
isoform1=junction:chr19:2234062-2235761:-|isoform2=junction:chr19:2234241-2235761:-@exon:chr19:2234150-2234240:-@junction:chr19:2234062-2234149:-	PLEKHJ1	included
isoform1=junction:chr19:2269745-2271781:+|isoform2=junction:chr19:2269745-2271384:+@exon:chr19:2271385-2271530:+@junction:chr19:2271531-2271781:+	OAZ1	included
isoform1=junction:chr1:92833661-92836189:+|isoform2=junction:chr1:92833661-92834778:+@exon:chr1:92834779-92834913:+@junction:chr1:92834914-92836189:+	RPL5	included
isoform1=junction:chr19:35116360-35119362:+|isoform2=junction:chr19:35116360-35117256:+@exon:chr19:35117257-35117378:+@junction:chr19:35117379-35119362:+	FXYD3	excluded
isoform1=junction:chr19:35116360-35119362:+|isoform2=junction:chr19:35116360-35119167:+@exon:chr19:35119168-35119251:+@junction:chr19:35119252-35119362:+	FXYD3	excluded
isoform1=junction:chr19:35122840-35123270:+|isoform2=junction:chr19:35122840-35122917:+@exon:chr19:35122918-35122954:+@junction:chr19:35122955-35123270:+	FXYD3	included
isoform1=junction:chr19:35158401-35164155:+|isoform2=junction:chr19:35158401-35160708:+@exon:chr19:35160709-35160801:+@junction:chr19:35160802-35164155:+	FXYD5	included
isoform1=junction:chr19:35546809-35547118:+|isoform2=junction:chr19:35546809-35546944:+@exon:chr19:35546945-35547029:+@junction:chr19:35547030-35547118:+	TMEM147	included
isoform1=junction:chr19:38264999-38287875:+|isoform2=junction:chr19:38264999-38283626:+@exon:chr19:38283627-38283797:+@junction:chr19:38283798-38287875:+	SPINT2	included
isoform1=junction:chr19:38283798-38289137:+|isoform2=junction:chr19:38283798-38287875:+@exon:chr19:38287876-38287935:+@junction:chr19:38287936-38289137:+	SPINT2	included
isoform1=junction:chr19:38632497-38634992:+|isoform2=junction:chr19:38632497-38632600:+@exon:chr19:38632601-38632678:+@junction:chr19:38632679-38634992:+	EIF3K	included
isoform1=junction:chr19:39433419-39433664:-|isoform2=junction:chr19:39433570-39433664:-@exon:chr19:39433522-39433569:-@junction:chr19:39433419-39433521:-	RPS16	included
isoform1=junction:chr19:40448047-40458154:-|isoform2=junction:chr19:40451493-40458154:-@exon:chr19:40451364-40451492:-@junction:chr19:40448047-40451363:-	BLVRB	included
isoform1=junction:chr19:43511567-43526514:-|isoform2=junction:chr19:43526350-43526514:-@exon:chr19:43526201-43526349:-@junction:chr19:43511567-43526200:-	ETHE1	included
isoform1=junction:chr19:43649144-43655438:-|isoform2=junction:chr19:43652372-43655438:-@exon:chr19:43652225-43652371:-@junction:chr19:43649144-43652224:-	PLAUR	included
isoform1=junction:chr19:43652372-43656478:-|isoform2=junction:chr19:43655574-43656478:-@exon:chr19:43655439-43655573:-@junction:chr19:43652372-43655438:-	PLAUR	included
isoform1=junction:chr19:54201610-54207397:+|isoform2=junction:chr19:54201610-54206275:+@exon:chr19:54206276-54206462:+@junction:chr19:54206463-54207397:+	RPS9	included
isoform1=junction:chr19:54206463-54207397:+|isoform2=junction:chr19:54206463-54206552:+@exon:chr19:54206553-54206724:+@junction:chr19:54206725-54207397:+	RPS9	excluded
isoform1=junction:chr19:55455331-55456348:-|isoform2=junction:chr19:55455846-55456348:-@exon:chr19:55455636-55455845:-@junction:chr19:55455331-55455635:-	ISOC2	included
isoform1=junction:chr19:58388246-58393358:+|isoform2=junction:chr19:58388246-58392975:+@exon:chr19:58392976-58393185:+@junction:chr19:58393186-58393358:+	RPS5	included
isoform1=junction:chr19:7630847-7631472:+|isoform2=junction:chr19:7630847-7631231:+@exon:chr19:7631232-7631321:+@junction:chr19:7631322-7631472:+	PET100	excluded
isoform1=junction:chr19:805188-806407:+|isoform2=junction:chr19:805188-805491:+@exon:chr19:805492-805569:+@junction:chr19:805570-806407:+	PTBP1	multimodal
isoform1=junction:chr19:8366320-8371055:+|isoform2=junction:chr19:8366320-8369218:+@exon:chr19:8369219-8369332:+@junction:chr19:8369333-8371055:+	ANGPTL4	multimodal
isoform1=junction:chr19:8471428-8474166:+|isoform2=junction:chr19:8471428-8473663:+@exon:chr19:8473664-8473708:+@junction:chr19:8473709-8474166:+	HNRNPM	included
isoform1=junction:chr19:8474245-8485602:+|isoform2=junction:chr19:8474245-8483157:+@exon:chr19:8483158-8483211:+@junction:chr19:8483212-8485602:+	HNRNPM	included
isoform1=junction:chr20:1372241-1392833:-|isoform2=junction:chr20:1375604-1392833:-@exon:chr20:1375491-1375603:-@junction:chr20:1372241-1375490:-	FKBP1A	included
isoform1=junction:chr20:1458275-1464328:-|isoform2=junction:chr20:1463442-1464328:-@exon:chr20:1463335-1463441:-@junction:chr20:1458275-1463334:-	NSFL1C	excluded
isoform1=junction:chr20:17570212-17600737:+|isoform2=junction:chr20:17570212-17591931:+@exon:chr20:17591932-17592063:+@junction:chr20:17592064-17600737:+	DSTN	excluded
isoform1=junction:chr20:20026920-20033101:+|isoform2=junction:chr20:20026920-20032507:+@exon:chr20:20032508-20032653:+@junction:chr20:20032654-20033101:+	NAA20	included
isoform1=junction:chr20:2465820-2467606:-|isoform2=junction:chr20:2467316-2467606:-@exon:chr20:2467192-2467315:-@junction:chr20:2465820-2467191:-	SNRPB	excluded
isoform1=junction:chr20:24964023-24968891:-|isoform2=junction:chr20:24964399-24968891:-@exon:chr20:24964375-24964398:-@junction:chr20:24964023-24964374:-	APMAP	excluded
isoform1=junction:chr20:24964023-24969525:-|isoform2=junction:chr20:24969085-24969525:-@exon:chr20:24968892-24969084:-@junction:chr20:24964023-24968891:-	APMAP	included
isoform1=junction:chr20:31550122-31559610:+|isoform2=junction:chr20:31550122-31554745:+@exon:chr20:31554746-31554829:+@junction:chr20:31554830-31559610:+	HM13	included
isoform1=junction:chr20:31561737-31569119:+|isoform2=junction:chr20:31561737-31566209:+@exon:chr20:31566210-31566295:+@junction:chr20:31566296-31569119:+	HM13	included
isoform1=junction:chr20:33994132-34072065:+|isoform2=junction:chr20:33994132-34031521:+@exon:chr20:34031522-34031604:+@junction:chr20:34031605-34072065:+	RALY	included
isoform1=junction:chr20:34073636-34075873:+|isoform2=junction:chr20:34073636-34073818:+@exon:chr20:34073819-34073866:+@junction:chr20:34073867-34075873:+	RALY	included
isoform1=junction:chr20:35280119-35284175:-|isoform2=junction:chr20:35280830-35284175:-@exon:chr20:35280654-35280829:-@junction:chr20:35280119-35280653:-	EIF6	included
isoform1=junction:chr20:35280119-35284380:-|isoform2=junction:chr20:35284262-35284380:-@exon:chr20:35284176-35284261:-@junction:chr20:35280119-35284175:-	EIF6	included
isoform1=junction:chr20:35280119-35284725:-|isoform2=junction:chr20:35284493-35284725:-@exon:chr20:35284176-35284492:-@junction:chr20:35280119-35284175:-	EIF6	included
isoform1=junction:chr20:35632026-35632310:-|isoform2=junction:chr20:35632235-35632310:-@exon:chr20:35632163-35632234:-@junction:chr20:35632026-35632162:-	CPNE1	multimodal
isoform1=junction:chr20:35732136-35738967:-|isoform2=junction:chr20:35734258-35738967:-@exon:chr20:35734186-35734257:-@junction:chr20:35732136-35734185:-	RBM39	excluded
isoform1=junction:chr20:35732136-35738967:-|isoform2=junction:chr20:35735082-35738967:-@exon:chr20:35734186-35735081:-@junction:chr20:35732136-35734185:-	RBM39	excluded
isoform1=junction:chr20:35739018-35740823:-|isoform2=junction:chr20:35740598-35740823:-@exon:chr20:35740525-35740597:-@junction:chr20:35739018-35740524:-	RBM39	multimodal
isoform1=junction:chr20:36545069-36549076:+|isoform2=junction:chr20:36545069-36548031:+@exon:chr20:36548032-36548193:+@junction:chr20:36548194-36549076:+	MYL9	multimodal
isoform1=junction:chr20:36607819-36609600:+@exon:chr20:36609601-36609730:+@junction:chr20:36609731-36612009:+|isoform2=junction:chr20:36607819-36607889:+@exon:chr20:36607890-36608000:+@junction:chr20:36608001-36612009:+	TGIF2-C20orf24	excluded
isoform1=junction:chr20:36607819-36609600:+|isoform2=junction:chr20:36607819-36607889:+@exon:chr20:36607890-36608000:+@junction:chr20:36608001-36609600:+	C20orf24	excluded
isoform1=junction:chr20:36607819-36612009:+|isoform2=junction:chr20:36607819-36609600:+@exon:chr20:36609601-36609730:+@junction:chr20:36609731-36612009:+	TGIF2-C20orf24	included
isoform1=junction:chr20:36608001-36612009:+|isoform2=junction:chr20:36608001-36609600:+@exon:chr20:36609601-36609730:+@junction:chr20:36609731-36612009:+	C20orf24	included
isoform1=junction:chr20:37230060-37234019:+|isoform2=junction:chr20:37230060-37232295:+@exon:chr20:37232296-37232391:+@junction:chr20:37232392-37234019:+	RPN2	included
isoform1=junction:chr20:38421099-38426418:-|isoform2=junction:chr20:38422242-38426418:-@exon:chr20:38422092-38422241:-@junction:chr20:38421099-38422091:-	SNHG17	bimodal
isoform1=junction:chr20:408780-417525:+|isoform2=junction:chr20:408780-409880:+@exon:chr20:409881-410025:+@junction:chr20:410026-417525:+	RBCK1	included
isoform1=junction:chr20:43458510-43459770:+|isoform2=junction:chr20:43458510-43459152:+@exon:chr20:43459153-43459420:+@junction:chr20:43459421-43459770:+	SRSF6	excluded
isoform1=junction:chr20:44901834-44903992:+|isoform2=junction:chr20:44901834-44902897:+@exon:chr20:44902898-44903121:+@junction:chr20:44903122-44903992:+	YWHAB	excluded
isoform1=junction:chr20:44901834-44903992:+|isoform2=junction:chr20:44901834-44903035:+@exon:chr20:44903036-44903121:+@junction:chr20:44903122-44903992:+	YWHAB	excluded
isoform1=junction:chr20:45252420-45253574:-|isoform2=junction:chr20:45253152-45253574:-@exon:chr20:45253002-45253151:-@junction:chr20:45252420-45253001:-	SLPI	included
isoform1=junction:chr20:45416344-45419294:+|isoform2=junction:chr20:45416344-45416516:+@exon:chr20:45416517-45418979:+@junction:chr20:45418980-45419294:+	PIGT	included
isoform1=junction:chr20:45416695-45419294:+|isoform2=junction:chr20:45416695-45418851:+@exon:chr20:45418852-45418979:+@junction:chr20:45418980-45419294:+	PIGT	included
isoform1=junction:chr20:45812797-45814383:+|isoform2=junction:chr20:45812797-45813436:+@exon:chr20:45813437-45813464:+@junction:chr20:45813465-45814383:+	UBE2C	included
isoform1=junction:chr20:45813465-45815540:+|isoform2=junction:chr20:45813465-45814383:+@exon:chr20:45814384-45814470:+@junction:chr20:45814471-45815540:+	UBE2C	included
isoform1=junction:chr20:45814471-45815540:+@exon:chr20:45815541-45815745:+@junction:chr20:45815746-45815853:+|isoform2=junction:chr20:45814471-45815389:+@exon:chr20:45815390-45815540:+@junction:chr20:45815541-45815853:+	UBE2C	excluded
isoform1=junction:chr20:45814471-45815853:+|isoform2=junction:chr20:45814471-45815540:+@exon:chr20:45815541-45815745:+@junction:chr20:45815746-45815853:+	UBE2C	included
isoform1=junction:chr20:45892028-45892397:+|isoform2=junction:chr20:45892028-45892272:+@exon:chr20:45892273-45892323:+@junction:chr20:45892324-45892397:+	CTSA	included
isoform1=junction:chr20:49154072-49174194:-|isoform2=junction:chr20:49166286-49174194:-@exon:chr20:49165997-49166285:-@junction:chr20:49154072-49165996:-	STAU1	excluded
isoform1=junction:chr20:49279209-49289044:+|isoform2=junction:chr20:49279209-49280484:+@exon:chr20:49280485-49280570:+@junction:chr20:49280571-49289044:+	ZFAS1	included
isoform1=junction:chr20:49280571-49289044:+|isoform2=junction:chr20:49280571-49280902:+@exon:chr20:49280903-49280964:+@junction:chr20:49280965-49289044:+	ZFAS1	multimodal
isoform1=junction:chr20:50830381-50876485:+|isoform2=junction:chr20:50830381-50841765:+@exon:chr20:50841766-50841900:+@junction:chr20:50841901-50876485:+	BCAS4	included
isoform1=junction:chr20:50942127-50945846:-|isoform2=junction:chr20:50945763-50945846:-@exon:chr20:50945737-50945762:-@junction:chr20:50942127-50945736:-	DPM1	included
isoform1=junction:chr20:58670604-58673630:+|isoform2=junction:chr20:58670604-58671153:+@exon:chr20:58671154-58671297:+@junction:chr20:58671298-58673630:+	STX16	multimodal
isoform1=junction:chr20:58895685-58903530:+|isoform2=junction:chr20:58895685-58898940:+@exon:chr20:58898941-58898985:+@junction:chr20:58898986-58903530:+	GNAS	included
isoform1=junction:chr20:59036761-59038465:-|isoform2=junction:chr20:59037281-59038465:-@exon:chr20:59037191-59037280:-@junction:chr20:59036761-59037190:-	PRELID3B	multimodal
isoform1=junction:chr20:62303782-62306196:+|isoform2=junction:chr20:62303782-62304460:+@exon:chr20:62304461-62304577:+@junction:chr20:62304578-62306196:+	ADRM1	included
isoform1=junction:chr20:62308179-62308654:+|isoform2=junction:chr20:62308179-62308367:+@exon:chr20:62308368-62308470:+@junction:chr20:62308471-62308654:+	ADRM1	included
isoform1=junction:chr20:62387675-62388308:+|isoform2=junction:chr20:62387675-62387842:+@exon:chr20:62387843-62387914:+@junction:chr20:62387915-62388308:+	RPS21	included
isoform1=junction:chr20:63873817-63882718:+|isoform2=junction:chr20:63873817-63875815:+@exon:chr20:63875816-63875875:+@junction:chr20:63875876-63882718:+	TPD52L2	multimodal
isoform1=junction:chr2:119367061-119368187:+|isoform2=junction:chr2:119367061-119367558:+@exon:chr2:119367559-119367644:+@junction:chr2:119367645-119368187:+	DBI	excluded
isoform1=junction:chr2:119367061-119368187:+|isoform2=junction:chr2:119367061-119367563:+@novel_exon:chr2:119367564-119367644:+@junction:chr2:119367645-119368187:+	DBI	excluded
isoform1=junction:chr21:25729802-25734852:-|isoform2=junction:chr21:25734376-25734852:-@exon:chr21:25734333-25734375:-@junction:chr21:25729802-25734332:-	ATP5J	excluded
isoform1=junction:chr21:25897674-25911740:-|isoform2=junction:chr21:25905078-25911740:-@exon:chr21:25905024-25905077:-@junction:chr21:25897674-25905023:-	APP	included
isoform1=junction:chr21:25982478-26000014:-|isoform2=junction:chr21:25997417-26000014:-@exon:chr21:25997360-25997416:-@junction:chr21:25982478-25997359:-	APP	multimodal
isoform1=junction:chr21:25982478-26021839:-|isoform2=junction:chr21:26000183-26021839:-@exon:chr21:26000015-26000182:-@junction:chr21:25982478-26000014:-	APP	included
isoform1=junction:chr21:33907454-33912288:-|isoform2=junction:chr21:33909212-33912288:-@exon:chr21:33909082-33909211:-@junction:chr21:33907454-33909081:-	AP000311.1	included
isoform1=junction:chr21:34073746-34142407:+|isoform2=junction:chr21:34073746-34125340:+@exon:chr21:34125341-34125480:+@junction:chr21:34125481-34142407:+	MRPS6	included
isoform1=junction:chr2:135742012-135748266:+|isoform2=junction:chr2:135742012-135742541:+@novel_exon:chr2:135742542-135742594:+@junction:chr2:135742595-135748266:+	UBXN4	excluded
isoform1=junction:chr2:135911494-135914468:-|isoform2=junction:chr2:135912567-135914468:-@exon:chr2:135912486-135912566:-@junction:chr2:135911494-135912485:-	DARS	included
isoform1=junction:chr21:39345275-39348291:-|isoform2=junction:chr21:39345959-39348291:-@exon:chr21:39345830-39345958:-@junction:chr21:39345275-39345829:-	HMGN1	excluded
isoform1=junction:chr21:41250902-41275370:+|isoform2=junction:chr21:41250902-41257157:+@exon:chr21:41257158-41257326:+@junction:chr21:41257327-41275370:+	BACE2	included
isoform1=junction:chr21:44865448-44873501:-|isoform2=junction:chr21:44865651-44873501:-@exon:chr21:44865571-44865650:-@junction:chr21:44865448-44865570:-	PTTG1IP	excluded
isoform1=junction:chr2:150474985-150487267:-|isoform2=junction:chr2:150486782-150487267:-@exon:chr2:150486694-150486781:-@junction:chr2:150474985-150486693:-	RND3	included
isoform1=junction:chr2:152677476-152679351:-|isoform2=junction:chr2:152679110-152679351:-@exon:chr2:152679056-152679109:-@junction:chr2:152677476-152679055:-	PRPF40A	multimodal
isoform1=junction:chr2:156330189-156332479:-|isoform2=junction:chr2:156330792-156332479:-@exon:chr2:156330668-156330791:-@junction:chr2:156330189-156330667:-	NR4A2	multimodal
isoform1=junction:chr2:159743254-159747804:+|isoform2=junction:chr2:159743254-159745769:+@exon:chr2:159745770-159745937:+@junction:chr2:159745938-159747804:+	MARCH7	included
isoform1=junction:chr2:169819644-169821942:-|isoform2=junction:chr2:169821274-169821942:-@exon:chr2:169821092-169821273:-@junction:chr2:169819644-169821091:-	METTL5	included
isoform1=junction:chr2:172562292-172564977:+|isoform2=junction:chr2:172562292-172564502:+@exon:chr2:172564503-172564687:+@junction:chr2:172564688-172564977:+	PDK1	bimodal
isoform1=junction:chr2:200329481-200389222:+|isoform2=junction:chr2:200329481-200383866:+@exon:chr2:200383867-200384017:+@junction:chr2:200384018-200389222:+	SPATS2L	excluded
isoform1=junction:chr2:200853994-200855003:-|isoform2=junction:chr2:200854696-200855003:-@exon:chr2:200854616-200854695:-@junction:chr2:200853994-200854615:-	CLK1	included
isoform1=junction:chr2:200859747-200861237:-|isoform2=junction:chr2:200860216-200861237:-@exon:chr2:200860125-200860215:-@junction:chr2:200859747-200860124:-	CLK1	multimodal
isoform1=junction:chr2:202292904-202297378:+|isoform2=junction:chr2:202292904-202295673:+@exon:chr2:202295674-202295837:+@junction:chr2:202295838-202297378:+	NOP58	included
isoform1=junction:chr2:214781510-214797060:-|isoform2=junction:chr2:214792446-214797060:-@exon:chr2:214792297-214792445:-@junction:chr2:214781510-214792296:-	BARD1	multimodal
isoform1=junction:chr2:218228851-218238663:+|isoform2=junction:chr2:218228851-218234351:+@exon:chr2:218234352-218234397:+@junction:chr2:218234398-218238663:+	ARPC2	included
isoform1=junction:chr22:18906726-18910171:+|isoform2=junction:chr22:18906726-18909979:+@exon:chr22:18909980-18910098:+@junction:chr22:18910099-18910171:+	AC007326.4	excluded
isoform1=junction:chr22:24233019-24233873:-|isoform2=junction:chr22:24233594-24233873:-@exon:chr22:24233498-24233593:-@junction:chr22:24233019-24233497:-	GGT5	multimodal
isoform1=junction:chr2:227340381-227355676:+|isoform2=junction:chr2:227340381-227347225:+@exon:chr2:227347226-227347384:+@junction:chr2:227347385-227355676:+	MFF	excluded
isoform1=junction:chr2:227340381-227355676:+|isoform2=junction:chr2:227340381-227352513:+@exon:chr2:227352514-227352573:+@junction:chr2:227352574-227355676:+	MFF	excluded
isoform1=junction:chr2:231455625-231456630:-|isoform2=junction:chr2:231456137-231456630:-@exon:chr2:231456010-231456136:-@junction:chr2:231455625-231456009:-	NCL	included
isoform1=junction:chr22:31944821-31956138:+|isoform2=junction:chr22:31944821-31945556:+@exon:chr22:31945557-31945678:+@junction:chr22:31945679-31956138:+	YWHAH	excluded
isoform1=junction:chr22:36467918-36480574:-|isoform2=junction:chr22:36476857-36480574:-@exon:chr22:36476733-36476856:-@junction:chr22:36467918-36476732:-	TXN2	included
isoform1=junction:chr2:237518649-237525600:+|isoform2=junction:chr2:237518649-237519909:+@exon:chr2:237519910-237520029:+@junction:chr2:237520030-237525600:+	MLPH	included
isoform1=junction:chr2:237527517-237540347:+|isoform2=junction:chr2:237527517-237534563:+@exon:chr2:237534564-237534647:+@junction:chr2:237534648-237540347:+	MLPH	excluded
isoform1=junction:chr2:237540534-237542566:+|isoform2=junction:chr2:237540534-237540801:+@exon:chr2:237540802-237540957:+@junction:chr2:237540958-237542566:+	MLPH	multimodal
isoform1=junction:chr22:37677066-37679602:+|isoform2=junction:chr22:37677066-37678482:+@exon:chr22:37678483-37678654:+@junction:chr22:37678655-37679602:+	LGALS1	included
isoform1=junction:chr2:237692522-237748363:+|isoform2=junction:chr2:237692522-237708543:+@exon:chr2:237708544-237708630:+@junction:chr2:237708631-237748363:+	LRRFIP1	included
isoform1=junction:chr2:237994810-238025341:+|isoform2=junction:chr2:237994810-238016565:+@exon:chr2:238016566-238016633:+@junction:chr2:238016634-238025341:+	UBE2F	included
isoform1=junction:chr2:238016634-238030555:+|isoform2=junction:chr2:238016634-238025341:+@exon:chr2:238025342-238025412:+@junction:chr2:238025413-238030555:+	UBE2F	included
isoform1=junction:chr22:39313311-39314106:-|isoform2=junction:chr22:39313730-39314106:-@exon:chr22:39313634-39313729:-@junction:chr22:39313311-39313633:-	RPL3	included
isoform1=junction:chr22:40951477-40964046:+|isoform2=junction:chr22:40951477-40953554:+@exon:chr22:40953555-40953633:+@junction:chr22:40953634-40964046:+	RBX1	included
isoform1=junction:chr22:40964118-40972475:+|isoform2=junction:chr22:40964118-40967798:+@exon:chr22:40967799-40967884:+@junction:chr22:40967885-40972475:+	RBX1	included
isoform1=junction:chr2:241678650-241685768:-|isoform2=junction:chr2:241680320-241685768:-@exon:chr2:241680229-241680319:-@junction:chr2:241678650-241680228:-	DTYMK	included
isoform1=junction:chr22:41939197-41945224:-|isoform2=junction:chr22:41943702-41945224:-@exon:chr22:41943610-41943701:-@junction:chr22:41939197-41943609:-	CENPM	included
isoform1=junction:chr22:42560266-42571120:+|isoform2=junction:chr22:42560266-42566303:+@exon:chr22:42566304-42566338:+@junction:chr22:42566339-42571120:+	SERHL2	included
isoform1=junction:chr22:43151605-43161051:+|isoform2=junction:chr22:43151605-43159209:+@exon:chr22:43159210-43159420:+@junction:chr22:43159421-43161051:+	TSPO	included
isoform1=junction:chr22:50527718-50529135:-|isoform2=junction:chr22:50528611-50529135:-@exon:chr22:50528512-50528610:-@junction:chr22:50527718-50528511:-	TYMP	included
isoform1=junction:chr2:26254475-26269952:+|isoform2=junction:chr2:26254475-26263379:+@exon:chr2:26263380-26263479:+@junction:chr2:26263480-26269952:+	HADHB	included
isoform1=junction:chr2:27201114-27201665:-|isoform2=junction:chr2:27201454-27201665:-@exon:chr2:27201350-27201453:-@junction:chr2:27201114-27201349:-	SLC5A6	multimodal
isoform1=junction:chr2:27206094-27206876:-|isoform2=junction:chr2:27206535-27206876:-@exon:chr2:27206483-27206534:-@junction:chr2:27206094-27206482:-	SLC5A6	included
isoform1=junction:chr2:27309982-27312213:-|isoform2=junction:chr2:27311952-27312213:-@exon:chr2:27311899-27311951:-@junction:chr2:27309982-27311898:-	MPV17	included
isoform1=junction:chr2:27442902-27443397:+|isoform2=junction:chr2:27442902-27443073:+@exon:chr2:27443074-27443280:+@junction:chr2:27443281-27443397:+	KRTCAP3	bimodal
isoform1=junction:chr2:27772693-27779432:+|isoform2=junction:chr2:27772693-27774423:+@exon:chr2:27774424-27774530:+@junction:chr2:27774531-27779432:+	MRPL33	multimodal
isoform1=junction:chr2:33263393-33274964:+|isoform2=junction:chr2:33263393-33273655:+@exon:chr2:33273656-33273781:+@junction:chr2:33273782-33274964:+	LTBP1	included
isoform1=junction:chr2:38745188-38746693:-|isoform2=junction:chr2:38746180-38746693:-@exon:chr2:38746144-38746179:-@junction:chr2:38745188-38746143:-	SRSF7	included
isoform1=junction:chr2:38748654-38749528:-|isoform2=junction:chr2:38749347-38749528:-@exon:chr2:38748898-38749346:-@junction:chr2:38748654-38748897:-	SRSF7	multimodal
isoform1=junction:chr2:54973622-54974694:-|isoform2=junction:chr2:54973868-54974694:-@exon:chr2:54973821-54973867:-@junction:chr2:54973622-54973820:-	RTN4	included
isoform1=junction:chr2:61868707-61872081:-|isoform2=junction:chr2:61869554-61872081:-@exon:chr2:61869440-61869553:-@junction:chr2:61868707-61869439:-	CCT4	included
isoform1=junction:chr2:61885073-61888380:-|isoform2=junction:chr2:61888258-61888380:-@novel_exon:chr2:61888199-61888257:-@junction:chr2:61885073-61888198:-	CCT4	excluded
isoform1=junction:chr2:65089071-65097970:-|isoform2=junction:chr2:65091079-65097970:-@exon:chr2:65090983-65091078:-@junction:chr2:65089071-65090982:-	RAB1A	included
isoform1=junction:chr2:70224630-70227734:-|isoform2=junction:chr2:70225394-70227734:-@exon:chr2:70225328-70225393:-@junction:chr2:70224630-70225327:-	TIA1	multimodal
isoform1=junction:chr2:70227823-70229263:-|isoform2=junction:chr2:70229092-70229263:-@exon:chr2:70229059-70229091:-@junction:chr2:70227823-70229058:-	TIA1	multimodal
isoform1=junction:chr2:70288193-70293617:-|isoform2=junction:chr2:70289373-70293617:-@exon:chr2:70289350-70289372:-@junction:chr2:70288193-70289349:-	SNRPG	included
isoform1=junction:chr2:73250439-73252639:+|isoform2=junction:chr2:73250439-73251225:+@exon:chr2:73251226-73251432:+@junction:chr2:73251433-73252639:+	CCT7	included
isoform1=junction:chr2:73927053-73946718:+|isoform2=junction:chr2:73927053-73938909:+@exon:chr2:73938910-73939022:+@junction:chr2:73939023-73946718:+	DGUOK	multimodal
isoform1=junction:chr2:73927053-73958145:+|isoform2=junction:chr2:73927053-73946718:+@exon:chr2:73946719-73946906:+@junction:chr2:73946907-73958145:+	DGUOK	multimodal
isoform1=junction:chr2:73946907-73957124:+|isoform2=junction:chr2:73946907-73950584:+@exon:chr2:73950585-73950732:+@junction:chr2:73950733-73957124:+	DGUOK	included
isoform1=junction:chr2:74135659-74145188:-|isoform2=junction:chr2:74142361-74145188:-@exon:chr2:74142272-74142360:-@junction:chr2:74135659-74142271:-	BOLA3	included
isoform1=junction:chr2:74205890-74207703:+|isoform2=junction:chr2:74205890-74205981:+@exon:chr2:74205982-74206088:+@junction:chr2:74206089-74207703:+	MTHFD2	excluded
isoform1=junction:chr2:74423386-74423854:+|isoform2=junction:chr2:74423386-74423477:+@exon:chr2:74423478-74423531:+@junction:chr2:74423532-74423854:+	WDR54	included
isoform1=junction:chr2:74472253-74472568:-|isoform2=junction:chr2:74472471-74472568:-@exon:chr2:74472358-74472470:-@junction:chr2:74472253-74472357:-	MRPL53	included
isoform1=junction:chr2:74528490-74529131:-|isoform2=junction:chr2:74528936-74529131:-@exon:chr2:74528751-74528935:-@junction:chr2:74528490-74528750:-	AUP1	included
isoform1=junction:chr2:84431660-84433351:-|isoform2=junction:chr2:84432355-84433351:-@novel_exon:chr2:84432318-84432354:-@junction:chr2:84431660-84432317:-	SUCLG1	excluded
isoform1=junction:chr2:84433436-84441046:-|isoform2=junction:chr2:84436128-84441046:-@novel_exon:chr2:84436052-84436127:-@junction:chr2:84433436-84436051:-	SUCLG1	excluded
isoform1=junction:chr2:85577650-85581575:+|isoform2=junction:chr2:85577650-85579008:+@exon:chr2:85579009-85579167:+@junction:chr2:85579168-85581575:+	VAMP8	included
isoform1=junction:chr2:85595850-85596906:+@novel_exon:chr2:85596907-85596931:+@junction:chr2:85596932-85597103:+|isoform2=junction:chr2:85595850-85596518:+@exon:chr2:85596519-85596649:+@junction:chr2:85596650-85597103:+	RNF181	multimodal
isoform1=junction:chr2:85596650-85597103:+|isoform2=junction:chr2:85596650-85596821:+@exon:chr2:85596822-85596931:+@junction:chr2:85596932-85597103:+	RNF181	included
isoform1=junction:chr2:9406906-9408112:-|isoform2=junction:chr2:9407599-9408112:-@exon:chr2:9407449-9407598:-@junction:chr2:9406906-9407448:-	ITGB1BP1	included
isoform1=junction:chr2:9474648-9478221:+|isoform2=junction:chr2:9474648-9475986:+@exon:chr2:9475987-9476039:+@junction:chr2:9476040-9478221:+	IAH1	bimodal
isoform1=junction:chr3:100341162-100346180:+|isoform2=junction:chr3:100341162-100345584:+@exon:chr3:100345585-100345678:+@junction:chr3:100345679-100346180:+	NIT2	included
isoform1=junction:chr3:100341162-100348802:+|isoform2=junction:chr3:100341162-100345584:+@exon:chr3:100345585-100346255:+@junction:chr3:100346256-100348802:+	NIT2	included
isoform1=junction:chr3:100345679-100348802:+|isoform2=junction:chr3:100345679-100346180:+@exon:chr3:100346181-100346255:+@junction:chr3:100346256-100348802:+	NIT2	included
isoform1=junction:chr3:108047293-108050577:-|isoform2=junction:chr3:108049652-108050577:-@exon:chr3:108049619-108049651:-@junction:chr3:108047293-108049618:-	CD47	multimodal
isoform1=junction:chr3:108047293-108051938:-|isoform2=junction:chr3:108050603-108051938:-@exon:chr3:108050578-108050602:-@junction:chr3:108047293-108050577:-	CD47	multimodal
isoform1=junction:chr3:108047293-108057476:-|isoform2=junction:chr3:108051971-108057476:-@exon:chr3:108051939-108051970:-@junction:chr3:108047293-108051938:-	CD47	included
isoform1=junction:chr3:113784439-113786231:+|isoform2=junction:chr3:113784439-113784695:+@exon:chr3:113784696-113784833:+@junction:chr3:113784834-113786231:+	ATP6V1A	included
isoform1=junction:chr3:119498928-119503531:+|isoform2=junction:chr3:119498928-119500694:+@exon:chr3:119500695-119500860:+@junction:chr3:119500861-119503531:+	TIMMDC1	included
isoform1=junction:chr3:12737755-12738552:-|isoform2=junction:chr3:12738169-12738552:-@exon:chr3:12738136-12738168:-@junction:chr3:12737755-12738135:-	TMEM40	included
isoform1=junction:chr3:127576697-127576989:-|isoform2=junction:chr3:127576894-127576989:-@exon:chr3:127576821-127576893:-@junction:chr3:127576697-127576820:-	TPRA1	included
isoform1=junction:chr3:127695191-127721052:-|isoform2=junction:chr3:127710666-127721052:-@exon:chr3:127710576-127710665:-@junction:chr3:127695191-127710575:-	MGLL	included
isoform1=junction:chr3:127710666-127721052:-|isoform2=junction:chr3:127715931-127721052:-@exon:chr3:127715853-127715930:-@junction:chr3:127710666-127715852:-	MGLL	excluded
isoform1=junction:chr3:129288998-129298353:+|isoform2=junction:chr3:129288998-129290678:+@exon:chr3:129290679-129290804:+@junction:chr3:129290805-129298353:+	HMCES	included
isoform1=junction:chr3:141738517-141745158:+|isoform2=junction:chr3:141738517-141743508:+@exon:chr3:141743509-141743556:+@junction:chr3:141743557-141745158:+	RNF7	included
isoform1=junction:chr3:146517168-146525604:-|isoform2=junction:chr3:146522054-146525604:-@exon:chr3:146521544-146522053:-@junction:chr3:146517168-146521543:-	PLSCR1	included
isoform1=junction:chr3:146525648-146533469:-|isoform2=junction:chr3:146528832-146533469:-@exon:chr3:146528614-146528831:-@junction:chr3:146525648-146528613:-	PLSCR1	multimodal
isoform1=junction:chr3:149009403-149026759:+|isoform2=junction:chr3:149009403-149024052:+@exon:chr3:149024053-149024272:+@junction:chr3:149024273-149026759:+	GYG1	included
isoform1=junction:chr3:149371868-149375679:-|isoform2=junction:chr3:149375589-149375679:-@exon:chr3:149375443-149375588:-@junction:chr3:149371868-149375442:-	TM4SF1	included
isoform1=junction:chr3:150544499-150546051:-|isoform2=junction:chr3:150545779-150546051:-@exon:chr3:150545703-150545778:-@junction:chr3:150544499-150545702:-	SERP1	included
isoform1=junction:chr3:152269093-152414940:+|isoform2=junction:chr3:152269093-152299404:+@exon:chr3:152299405-152300367:+@junction:chr3:152300368-152414940:+	MBNL1	multimodal
isoform1=junction:chr3:152415112-152445281:+|isoform2=junction:chr3:152415112-152432716:+@exon:chr3:152432717-152432920:+@junction:chr3:152432921-152445281:+	MBNL1	included
isoform1=junction:chr3:157150382-157152176:-|isoform2=junction:chr3:157151931-157152176:-@exon:chr3:157151729-157151930:-@junction:chr3:157150382-157151728:-	CCNL1	excluded
isoform1=junction:chr3:157150382-157152176:-|isoform2=junction:chr3:157151931-157152176:-@exon:chr3:157151917-157151930:-@junction:chr3:157150382-157151916:-	CCNL1	excluded
isoform1=junction:chr3:158704928-158713796:-|isoform2=junction:chr3:158710934-158713796:-@exon:chr3:158710738-158710933:-@junction:chr3:158704928-158710737:-	RARRES1	included
isoform1=junction:chr3:158804372-158807039:+|isoform2=junction:chr3:158804372-158805361:+@exon:chr3:158805362-158805474:+@junction:chr3:158805475-158807039:+	MFSD1	included
isoform1=junction:chr3:161346356-161359801:-|isoform2=junction:chr3:161348104-161359801:-@exon:chr3:161347965-161348103:-@junction:chr3:161346356-161347964:-	SPTSSB	multimodal
isoform1=junction:chr3:170263430-170270420:+|isoform2=junction:chr3:170263430-170267914:+@exon:chr3:170267915-170268000:+@junction:chr3:170268001-170270420:+	PRKCI	included
isoform1=junction:chr3:172509322-172514860:-|isoform2=junction:chr3:172511660-172514860:-@exon:chr3:172511617-172511659:-@junction:chr3:172509322-172511616:-	TNFSF10	bimodal
isoform1=junction:chr3:172755375-172756982:+|isoform2=junction:chr3:172755375-172755482:+@exon:chr3:172755483-172755575:+@junction:chr3:172755576-172756982:+	ECT2	excluded
isoform1=junction:chr3:172759070-172761609:+|isoform2=junction:chr3:172759070-172760155:+@exon:chr3:172760156-172760263:+@junction:chr3:172760264-172761609:+	ECT2	bimodal
isoform1=junction:chr3:179574468-179576216:+|isoform2=junction:chr3:179574468-179575402:+@exon:chr3:179575403-179575504:+@junction:chr3:179575505-179576216:+	ACTL6A	excluded
isoform1=junction:chr3:179615060-179615982:+|isoform2=junction:chr3:179615060-179615555:+@exon:chr3:179615556-179615615:+@junction:chr3:179615616-179615982:+	NDUFB5	excluded
isoform1=junction:chr3:183833590-183840569:-|isoform2=junction:chr3:183833826-183840569:-@exon:chr3:183833724-183833825:-@junction:chr3:183833590-183833723:-	AC131160.1	multimodal
isoform1=junction:chr3:184180252-184180848:+|isoform2=junction:chr3:184180252-184180644:+@exon:chr3:184180645-184180650:+@junction:chr3:184180651-184180848:+	AP2M1	included
isoform1=junction:chr3:184365227-184368176:+|isoform2=junction:chr3:184365227-184366716:+@exon:chr3:184366717-184366800:+@junction:chr3:184366801-184368176:+	POLR2H	included
isoform1=junction:chr3:185494762-185496827:-|isoform2=junction:chr3:185495316-185496827:-@exon:chr3:185495154-185495315:-@junction:chr3:185494762-185495153:-	TMEM41A	multimodal
isoform1=junction:chr3:186784697-186785882:+|isoform2=junction:chr3:186784697-186784961:+@exon:chr3:186784962-186785101:+@junction:chr3:186785102-186785882:+	EIF4A2	multimodal
isoform1=junction:chr3:186787883-186789124:+|isoform2=junction:chr3:186787883-186788309:+@exon:chr3:186788310-186788420:+@junction:chr3:186788421-186789124:+	EIF4A2	multimodal
isoform1=junction:chr3:32442014-32452391:+|isoform2=junction:chr3:32442014-32449453:+@exon:chr3:32449454-32449552:+@junction:chr3:32449553-32452391:+	CMTM7	multimodal
isoform1=junction:chr3:47917175-47921764:-|isoform2=junction:chr3:47918842-47921764:-@exon:chr3:47918719-47918841:-@junction:chr3:47917175-47918718:-	MAP4	included
isoform1=junction:chr3:50642333-50645709:+|isoform2=junction:chr3:50642333-50644408:+@exon:chr3:50644409-50644532:+@junction:chr3:50644533-50645709:+	MAPKAPK3	included
isoform1=junction:chr3:50646826-50647893:+|isoform2=junction:chr3:50646826-50647122:+@exon:chr3:50647123-50647203:+@junction:chr3:50647204-50647893:+	MAPKAPK3	included
isoform1=junction:chr3:52706704-52707686:+|isoform2=junction:chr3:52706704-52706792:+@exon:chr3:52706793-52706879:+@junction:chr3:52706880-52707686:+	SPCS1	included
isoform1=junction:chr3:87227557-87245713:+|isoform2=junction:chr3:87227557-87240698:+@exon:chr3:87240699-87240790:+@junction:chr3:87240791-87245713:+	CHMP2B	included
isoform1=junction:chr4:102802639-102809671:-|isoform2=junction:chr4:102809160-102809671:-@exon:chr4:102809068-102809159:-@junction:chr4:102802639-102809067:-	UBE2D3	excluded
isoform1=junction:chr4:105424323-105446382:-|isoform2=junction:chr4:105438037-105446382:-@exon:chr4:105437950-105438036:-@junction:chr4:105424323-105437949:-	PPA2	included
isoform1=junction:chr4:108655658-108667246:+|isoform2=junction:chr4:108655658-108657449:+@exon:chr4:108657450-108657647:+@junction:chr4:108657648-108667246:+	OSTC	included
isoform1=junction:chr4:121670013-121671546:-|isoform2=junction:chr4:121670223-121671546:-@novel_exon:chr4:121670174-121670222:-@junction:chr4:121670013-121670173:-	ANXA5	excluded
isoform1=junction:chr4:139678643-139703454:+|isoform2=junction:chr4:139678643-139695196:+@exon:chr4:139695197-139695267:+@junction:chr4:139695268-139703454:+	MGST2	included
isoform1=junction:chr4:1700071-1711873:-|isoform2=junction:chr4:1703701-1711873:-@exon:chr4:1703596-1703700:-@junction:chr4:1700071-1703595:-	SLBP	included
isoform1=junction:chr4:2823038-2824612:+|isoform2=junction:chr4:2823038-2823394:+@exon:chr4:2823395-2823569:+@junction:chr4:2823570-2824612:+	SH3BP2	excluded
isoform1=junction:chr4:39552159-39572414:-|isoform2=junction:chr4:39556571-39572414:-@exon:chr4:39556428-39556570:-@junction:chr4:39552159-39556427:-	SMIM14	included
isoform1=junction:chr4:48885566-48894005:-|isoform2=junction:chr4:48892890-48894005:-@exon:chr4:48892772-48892889:-@junction:chr4:48885566-48892771:-	OCIAD2	included
isoform1=junction:chr4:48894054-48897803:-|isoform2=junction:chr4:48897225-48897803:-@novel_exon:chr4:48897154-48897224:-@junction:chr4:48894054-48897153:-	OCIAD2	excluded
isoform1=junction:chr4:48897858-48904483:-|isoform2=junction:chr4:48899926-48904483:-@exon:chr4:48899829-48899925:-@junction:chr4:48897858-48899828:-	OCIAD2	included
isoform1=junction:chr4:55364272-55369831:+|isoform2=junction:chr4:55364272-55367587:+@exon:chr4:55367588-55367722:+@junction:chr4:55367723-55369831:+	SRD5A3	included
isoform1=junction:chr4:55600576-55607297:-|isoform2=junction:chr4:55605350-55607297:-@exon:chr4:55605275-55605349:-@junction:chr4:55600576-55605274:-	NMU	multimodal
isoform1=junction:chr4:77048663-77055961:-|isoform2=junction:chr4:77055381-77055961:-@exon:chr4:77055150-77055380:-@junction:chr4:77048663-77055149:-	CCNI	included
isoform1=junction:chr4:82424884-82426036:-|isoform2=junction:chr4:82425668-82426036:-@exon:chr4:82425563-82425667:-@junction:chr4:82424884-82425562:-	HNRNPDL	excluded
isoform1=junction:chr4:82426130-82427189:-|isoform2=junction:chr4:82426634-82427189:-@exon:chr4:82426463-82426633:-@junction:chr4:82426130-82426462:-	HNRNPDL	included
isoform1=junction:chr4:83456959-83459739:+|isoform2=junction:chr4:83456959-83458345:+@exon:chr4:83458346-83458429:+@junction:chr4:83458430-83459739:+	MRPS18C	included
isoform1=junction:chr4:83458430-83460972:+|isoform2=junction:chr4:83458430-83459739:+@exon:chr4:83459740-83459797:+@junction:chr4:83459798-83460972:+	MRPS18C	included
isoform1=junction:chr4:94455385-94573350:+|isoform2=junction:chr4:94455385-94523723:+@exon:chr4:94523724-94523875:+@junction:chr4:94523876-94573350:+	PDLIM5	included
isoform1=junction:chr4:94576035-94585564:+|isoform2=junction:chr4:94576035-94584985:+@exon:chr4:94584986-94585003:+@junction:chr4:94585004-94585564:+	PDLIM5	excluded
isoform1=junction:chr5:10254206-10255954:+|isoform2=junction:chr5:10254206-10254673:+@exon:chr5:10254674-10254838:+@junction:chr5:10254839-10255954:+	CCT5	included
isoform1=junction:chr5:131159612-131165094:-|isoform2=junction:chr5:131162677-131165094:-@exon:chr5:131162572-131162676:-@junction:chr5:131159612-131162571:-	HINT1	included
isoform1=junction:chr5:132485717-132486556:-|isoform2=junction:chr5:132486374-132486556:-@exon:chr5:132486251-132486373:-@junction:chr5:132485717-132486250:-	IRF1	bimodal
isoform1=junction:chr5:132866688-132867487:+|isoform2=junction:chr5:132866688-132866868:+@exon:chr5:132866869-132867035:+@junction:chr5:132867036-132867487:+	UQCRQ	included
isoform1=junction:chr5:134199205-134200984:-|isoform2=junction:chr5:134200497-134200984:-@exon:chr5:134200335-134200496:-@junction:chr5:134199205-134200334:-	PPP2CA	included
isoform1=junction:chr5:134376695-134388324:+|isoform2=junction:chr5:134376695-134380718:+@exon:chr5:134380719-134380808:+@junction:chr5:134380809-134388324:+	UBE2B	included
isoform1=junction:chr5:135350914-135360496:-@exon:chr5:135350823-135350913:-@junction:chr5:135346058-135350822:-|isoform2=junction:chr5:135353046-135360496:-@exon:chr5:135352946-135353045:-@junction:chr5:135346058-135352945:-	H2AFY	included
isoform1=junction:chr5:135350914-135360496:-@novel_exon:chr5:135350827-135350913:-@junction:chr5:135346058-135350826:-|isoform2=junction:chr5:135353046-135360496:-@exon:chr5:135352946-135353045:-@junction:chr5:135346058-135352945:-	H2AFY	included
isoform1=junction:chr5:138561790-138567000:-|isoform2=junction:chr5:138566719-138567000:-@exon:chr5:138566626-138566718:-@junction:chr5:138561790-138566625:-	HSPA9	included
isoform1=junction:chr5:138573851-138575237:-|isoform2=junction:chr5:138574127-138575237:-@exon:chr5:138574068-138574126:-@junction:chr5:138573851-138574067:-	HSPA9	included
isoform1=junction:chr5:138782030-138810037:+|isoform2=junction:chr5:138782030-138783176:+@exon:chr5:138783177-138783372:+@junction:chr5:138783373-138810037:+	CTNNA1	included
isoform1=junction:chr5:140281534-140303040:-|isoform2=junction:chr5:140300583-140303040:-@exon:chr5:140300416-140300582:-@junction:chr5:140281534-140300415:-	PFDN1	included
isoform1=junction:chr5:142135818-142140562:+|isoform2=junction:chr5:142135818-142137733:+@exon:chr5:142137734-142137858:+@junction:chr5:142137859-142140562:+	NDFIP1	included
isoform1=junction:chr5:146459338-146463550:+|isoform2=junction:chr5:146459338-146462017:+@exon:chr5:146462018-146462096:+@junction:chr5:146462097-146463550:+	TCERG1	excluded
isoform1=junction:chr5:150402626-150404679:-|isoform2=junction:chr5:150403313-150404679:-@exon:chr5:150403121-150403312:-@junction:chr5:150402626-150403120:-	CD74	excluded
isoform1=junction:chr5:150406322-150407151:-|isoform2=junction:chr5:150406961-150407151:-@exon:chr5:150406881-150406960:-@junction:chr5:150406322-150406880:-	CD74	included
isoform1=junction:chr5:151742960-151751703:-|isoform2=junction:chr5:151746450-151751703:-@exon:chr5:151746279-151746449:-@junction:chr5:151742960-151746278:-	ATOX1	included
isoform1=junction:chr5:154941266-154956370:+|isoform2=junction:chr5:154941266-154950820:+@exon:chr5:154950821-154950938:+@junction:chr5:154950939-154956370:+	MRPL22	included
isoform1=junction:chr5:163457081-163459861:-|isoform2=junction:chr5:163457611-163459861:-@exon:chr5:163457562-163457610:-@junction:chr5:163457081-163457561:-	NUDCD2	included
isoform1=junction:chr5:171388007-171391304:+|isoform2=junction:chr5:171388007-171390050:+@exon:chr5:171390051-171390130:+@junction:chr5:171390131-171391304:+	NPM1	included
isoform1=junction:chr5:172769133-172770160:-|isoform2=junction:chr5:172769795-172770160:-@exon:chr5:172769575-172769794:-@junction:chr5:172769133-172769574:-	DUSP1	included
isoform1=junction:chr5:172769795-172770585:-|isoform2=junction:chr5:172770307-172770585:-@exon:chr5:172770161-172770306:-@junction:chr5:172769795-172770160:-	DUSP1	included
isoform1=junction:chr5:176355750-176359810:-|isoform2=junction:chr5:176359568-176359810:-@exon:chr5:176359481-176359567:-@junction:chr5:176355750-176359480:-	KIAA1191	bimodal
isoform1=junction:chr5:179614960-179616125:-|isoform2=junction:chr5:179615596-179616125:-@exon:chr5:179615546-179615595:-@junction:chr5:179614960-179615545:-	HNRNPH1	included
isoform1=junction:chr5:179618324-179620891:-|isoform2=junction:chr5:179619408-179620891:-@exon:chr5:179619269-179619407:-@junction:chr5:179618324-179619268:-	HNRNPH1	multimodal
isoform1=junction:chr5:181238240-181239486:-|isoform2=junction:chr5:181239178-181239486:-@exon:chr5:181239067-181239177:-@junction:chr5:181238240-181239066:-	RACK1	included
isoform1=junction:chr5:304222-311292:+|isoform2=junction:chr5:304222-306601:+@exon:chr5:306602-306754:+@junction:chr5:306755-311292:+	PDCD6	included
isoform1=junction:chr5:304222-311292:+|isoform2=junction:chr5:304222-306601:+@exon:chr5:306602-306760:+@junction:chr5:306761-311292:+	PDCD6	included
isoform1=junction:chr5:32135687-32173809:-|isoform2=junction:chr5:32143881-32173809:-@exon:chr5:32143749-32143880:-@junction:chr5:32135687-32143748:-	GOLPH3	included
isoform1=junction:chr5:32274123-32312757:-|isoform2=junction:chr5:32276743-32312757:-@exon:chr5:32276682-32276742:-@junction:chr5:32274123-32276681:-	MTMR12	included
isoform1=junction:chr5:33445405-33453288:+|isoform2=junction:chr5:33445405-33448540:+@exon:chr5:33448541-33448731:+@junction:chr5:33448732-33453288:+	TARS	included
isoform1=junction:chr5:43297167-43298517:-|isoform2=junction:chr5:43298135-43298517:-@exon:chr5:43298009-43298134:-@junction:chr5:43297167-43298008:-	HMGCS1	included
isoform1=junction:chr5:53603531-53658550:+|isoform2=junction:chr5:53603531-53646232:+@exon:chr5:53646233-53646405:+@junction:chr5:53646406-53658550:+	NDUFS4	included
isoform1=junction:chr5:55957292-55960401:-|isoform2=junction:chr5:55959672-55960401:-@exon:chr5:55959626-55959671:-@junction:chr5:55957292-55959625:-	IL6ST	excluded
isoform1=junction:chr5:69171453-69174876:+|isoform2=junction:chr5:69171453-69174250:+@exon:chr5:69174251-69174409:+@junction:chr5:69174410-69174876:+	CCNB1	included
isoform1=junction:chr5:96727531-96729611:+|isoform2=junction:chr5:96727531-96729152:+@exon:chr5:96729153-96729209:+@junction:chr5:96729210-96729611:+	CAST	included
isoform1=junction:chr5:96740119-96741265:+|isoform2=junction:chr5:96740119-96740744:+@exon:chr5:96740745-96740783:+@junction:chr5:96740784-96741265:+	CAST	bimodal
isoform1=junction:chr6:106202090-106279660:-|isoform2=junction:chr6:106248245-106279660:-@exon:chr6:106248150-106248244:-@junction:chr6:106202090-106248149:-	ATG5	included
isoform1=junction:chr6:106293107-106316100:-|isoform2=junction:chr6:106308492-106316100:-@exon:chr6:106308364-106308491:-@junction:chr6:106293107-106308363:-	ATG5	multimodal
isoform1=junction:chr6:106629706-106640348:+|isoform2=junction:chr6:106629706-106640100:+@exon:chr6:106640101-106640206:+@junction:chr6:106640207-106640348:+	QRSL1	multimodal
isoform1=junction:chr6:10723242-10724960:+|isoform2=junction:chr6:10723242-10724569:+@exon:chr6:10724570-10724633:+@junction:chr6:10724634-10724960:+	TMEM14C	included
isoform1=junction:chr6:107274228-107458989:-|isoform2=junction:chr6:107334333-107458989:-@exon:chr6:107334198-107334332:-@junction:chr6:107274228-107334197:-	PDSS2	included
isoform1=junction:chr6:10749699-10755141:+|isoform2=junction:chr6:10749699-10751132:+@exon:chr6:10751133-10751234:+@junction:chr6:10751235-10755141:+	TMEM14B	included
isoform1=junction:chr6:10751235-10756466:+|isoform2=junction:chr6:10751235-10755141:+@exon:chr6:10755142-10755232:+@junction:chr6:10755233-10756466:+	TMEM14B	included
isoform1=junction:chr6:109369018-109376073:-|isoform2=junction:chr6:109370468-109376073:-@exon:chr6:109370411-109370467:-@junction:chr6:109369018-109370410:-	CD164	included
isoform1=junction:chr6:125927759-125928635:+|isoform2=junction:chr6:125927759-125928173:+@exon:chr6:125928174-125928247:+@junction:chr6:125928248-125928635:+	NCOA7	included
isoform1=junction:chr6:128397689-128520258:-|isoform2=junction:chr6:128409333-128520258:-@exon:chr6:128409294-128409332:-@junction:chr6:128397689-128409293:-	PTPRK	excluded
isoform1=junction:chr6:132814783-132816460:+|isoform2=junction:chr6:132814783-132814971:+@exon:chr6:132814972-132815088:+@junction:chr6:132815089-132816460:+	RPS12	included
isoform1=junction:chr6:149572345-149578821:+|isoform2=junction:chr6:149572345-149572506:+@exon:chr6:149572507-149572603:+@junction:chr6:149572604-149578821:+	GINM1	included
isoform1=junction:chr6:159685034-159692660:-|isoform2=junction:chr6:159688243-159692660:-@exon:chr6:159688126-159688242:-@junction:chr6:159685034-159688125:-	SOD2	included
isoform1=junction:chr6:2115881-2124686:-|isoform2=junction:chr6:2117557-2124686:-@exon:chr6:2117469-2117556:-@junction:chr6:2115881-2117468:-	GMDS	included
isoform1=junction:chr6:24784170-24785637:+|isoform2=junction:chr6:24784170-24784443:+@exon:chr6:24784444-24784554:+@junction:chr6:24784555-24785637:+	GMNN	included
isoform1=junction:chr6:2840595-2841811:-|isoform2=junction:chr6:2841476-2841811:-@exon:chr6:2841216-2841475:-@junction:chr6:2840595-2841215:-	SERPINB1	excluded
isoform1=junction:chr6:29944398-29945058:+|isoform2=junction:chr6:29944398-29944499:+@exon:chr6:29944500-29944616:+@junction:chr6:29944617-29945058:+	HLA-A	included
isoform1=junction:chr6:30061670-30062223:+|isoform2=junction:chr6:30061670-30061916:+@exon:chr6:30061917-30062017:+@junction:chr6:30062018-30062223:+	ZNRD1	bimodal
isoform1=junction:chr6:30741334-30741791:-|isoform2=junction:chr6:30741705-30741791:-@exon:chr6:30741614-30741704:-@junction:chr6:30741334-30741613:-	FLOT1	included
isoform1=junction:chr6:32974766-32975383:+|isoform2=junction:chr6:32974766-32975020:+@exon:chr6:32975021-32975112:+@junction:chr6:32975113-32975383:+	BRD2	excluded
isoform1=junction:chr6:34247150-34247680:-|isoform2=junction:chr6:34247493-34247680:-@exon:chr6:34247467-34247492:-@junction:chr6:34247150-34247466:-	SMIM29	included
isoform1=junction:chr6:34757552-34762594:+|isoform2=junction:chr6:34757552-34757911:+@exon:chr6:34757912-34757954:+@junction:chr6:34757955-34762594:+	SNRPC	included
isoform1=junction:chr6:36470258-36479120:+|isoform2=junction:chr6:36470258-36474788:+@exon:chr6:36474789-36475062:+@junction:chr6:36475063-36479120:+	KCTD20	multimodal
isoform1=junction:chr6:36479224-36481561:+|isoform2=junction:chr6:36479224-36479590:+@exon:chr6:36479591-36479711:+@junction:chr6:36479712-36481561:+	KCTD20	multimodal
isoform1=junction:chr6:36598984-36601151:+|isoform2=junction:chr6:36598984-36599820:+@exon:chr6:36599821-36600276:+@junction:chr6:36600277-36601151:+	SRSF3	excluded
isoform1=junction:chr6:41151385-41154245:-|isoform2=junction:chr6:41154091-41154245:-@exon:chr6:41153758-41154090:-@junction:chr6:41151385-41153757:-	TREML1	multimodal
isoform1=junction:chr6:41937395-41941451:-|isoform2=junction:chr6:41940586-41941451:-@exon:chr6:41940370-41940585:-@junction:chr6:41937395-41940369:-	CCND3	included
isoform1=junction:chr6:41940586-41941451:-|isoform2=junction:chr6:41941162-41941451:-@exon:chr6:41940952-41941161:-@junction:chr6:41940586-41940951:-	CCND3	excluded
isoform1=junction:chr6:42211918-42214279:-|isoform2=junction:chr6:42214193-42214279:-@exon:chr6:42214120-42214192:-@junction:chr6:42211918-42214119:-	MRPS10	multimodal
isoform1=junction:chr6:42934599-42935573:+|isoform2=junction:chr6:42934599-42935411:+@novel_exon:chr6:42935412-42935473:+@junction:chr6:42935474-42935573:+	CNPY3	excluded
isoform1=junction:chr6:44247196-44249376:+|isoform2=junction:chr6:44247196-44248629:+@exon:chr6:44248630-44248776:+@junction:chr6:44248777-44249376:+	HSP90AB1	included
isoform1=junction:chr6:75237989-75241175:-|isoform2=junction:chr6:75240386-75241175:-@exon:chr6:75240301-75240385:-@junction:chr6:75237989-75240300:-	COX7A2	included
isoform1=junction:chr6:85489600-85491976:+|isoform2=junction:chr6:85489600-85490507:+@exon:chr6:85490508-85490657:+@junction:chr6:85490658-85491976:+	NT5E	multimodal
isoform1=junction:chr6:85677493-85678135:-|isoform2=junction:chr6:85678033-85678135:-@exon:chr6:85677795-85678032:-@junction:chr6:85677493-85677794:-	SNHG5	included
isoform1=junction:chr7:100090655-100091037:+|isoform2=junction:chr7:100090655-100090901:+@exon:chr7:100090902-100090949:+@junction:chr7:100090950-100091037:+	COPS6	included
isoform1=junction:chr7:107749048-107753410:+|isoform2=junction:chr7:107749048-107752544:+@exon:chr7:107752545-107752617:+@junction:chr7:107752618-107753410:+	CBLL1	bimodal
isoform1=junction:chr7:112462180-112467980:+|isoform2=junction:chr7:112462180-112462269:+@exon:chr7:112462270-112462378:+@junction:chr7:112462379-112467980:+	IFRD1	multimodal
isoform1=junction:chr7:116250497-116252317:+|isoform2=junction:chr7:116250497-116251759:+@exon:chr7:116251760-116251975:+@junction:chr7:116251976-116252317:+	TES	included
isoform1=junction:chr7:128863063-128865376:+|isoform2=junction:chr7:128863063-128865119:+@exon:chr7:128865120-128865203:+@junction:chr7:128865204-128865376:+	ATP6V1F	excluded
isoform1=junction:chr7:140696843-140702865:+|isoform2=junction:chr7:140696843-140700869:+@exon:chr7:140700870-140700959:+@junction:chr7:140700960-140702865:+	NDUFB2	excluded
isoform1=junction:chr7:141739191-141742168:+|isoform2=junction:chr7:141739191-141741748:+@exon:chr7:141741749-141741792:+@junction:chr7:141741793-141742168:+	SSBP1	excluded
isoform1=junction:chr7:16795020-16799743:-|isoform2=junction:chr7:16797695-16799743:-@exon:chr7:16797631-16797694:-@junction:chr7:16795020-16797630:-	AGR2	included
isoform1=junction:chr7:16859632-16861383:-|isoform2=junction:chr7:16860584-16861383:-@exon:chr7:16860500-16860583:-@junction:chr7:16859632-16860499:-	AGR3	included
isoform1=junction:chr7:16873844-16881943:-|isoform2=junction:chr7:16878646-16881943:-@exon:chr7:16878510-16878645:-@junction:chr7:16873844-16878509:-	AGR3	multimodal
isoform1=junction:chr7:16878646-16881943:-|isoform2=junction:chr7:16880756-16881943:-@novel_exon:chr7:16880724-16880755:-@junction:chr7:16878646-16880723:-	AGR3	multimodal
isoform1=junction:chr7:22813186-22822676:-|isoform2=junction:chr7:22818049-22822676:-@exon:chr7:22818000-22818048:-@junction:chr7:22813186-22817999:-	TOMM7	included
isoform1=junction:chr7:26193374-26195846:-|isoform2=junction:chr7:26193695-26195846:-@exon:chr7:26193575-26193694:-@junction:chr7:26193374-26193574:-	HNRNPA2B1	included
isoform1=junction:chr7:26197733-26200571:-|isoform2=junction:chr7:26197867-26200571:-@exon:chr7:26197831-26197866:-@junction:chr7:26197733-26197830:-	HNRNPA2B1	excluded
isoform1=junction:chr7:30498939-30504568:-|isoform2=junction:chr7:30500682-30504568:-@exon:chr7:30500536-30500681:-@junction:chr7:30498939-30500535:-	GGCT	included
isoform1=junction:chr7:35801271-35832797:+|isoform2=junction:chr7:35801271-35831491:+@exon:chr7:35831492-35831496:+@junction:chr7:35831497-35832797:+	SEPT7	bimodal
isoform1=junction:chr7:42935137-42937321:+|isoform2=junction:chr7:42935137-42937147:+@novel_exon:chr7:42937148-42937241:+@junction:chr7:42937242-42937321:+	MRPL32	excluded
isoform1=junction:chr7:42935137-42937321:+|isoform2=junction:chr7:42935137-42937163:+@exon:chr7:42937164-42937241:+@junction:chr7:42937242-42937321:+	MRPL32	excluded
isoform1=junction:chr7:44579629-44581448:-|isoform2=junction:chr7:44581240-44581448:-@exon:chr7:44581093-44581239:-@junction:chr7:44579629-44581092:-	TMED4	included
isoform1=junction:chr7:44796794-44799246:+|isoform2=junction:chr7:44796794-44798747:+@exon:chr7:44798748-44798814:+@junction:chr7:44798815-44799246:+	PPIA	excluded
isoform1=junction:chr7:44796794-44799246:+|isoform2=junction:chr7:44796794-44798747:+@exon:chr7:44798748-44798904:+@junction:chr7:44798905-44799246:+	PPIA	excluded
isoform1=junction:chr7:44799481-44801286:+|isoform2=junction:chr7:44799481-44799701:+@exon:chr7:44799702-44799874:+@junction:chr7:44799875-44801286:+	PPIA	included
isoform1=junction:chr7:44834563-44840898:-|isoform2=junction:chr7:44835659-44840898:-@exon:chr7:44835529-44835658:-@junction:chr7:44834563-44835528:-	H2AFV	included
isoform1=junction:chr7:45069962-45073459:+|isoform2=junction:chr7:45069962-45072725:+@exon:chr7:45072726-45072783:+@junction:chr7:45072784-45073459:+	CCM2	included
isoform1=junction:chr7:56051986-56054368:+|isoform2=junction:chr7:56051986-56052421:+@exon:chr7:56052422-56052485:+@junction:chr7:56052486-56054368:+	CCT6A	included
isoform1=junction:chr7:56060941-56062682:+|isoform2=junction:chr7:56060941-56061746:+@exon:chr7:56061747-56061849:+@junction:chr7:56061850-56062682:+	CCT6A	included
isoform1=junction:chr7:6392042-6400125:+|isoform2=junction:chr7:6392042-6398661:+@exon:chr7:6398662-6398718:+@junction:chr7:6398719-6400125:+	RAC1	multimodal
isoform1=junction:chr7:6400189-6402315:+|isoform2=junction:chr7:6400189-6401867:+@exon:chr7:6401868-6402027:+@junction:chr7:6402028-6402315:+	RAC1	included
isoform1=junction:chr7:73694051-73697604:+|isoform2=junction:chr7:73694051-73697465:+@exon:chr7:73697466-73697516:+@junction:chr7:73697517-73697604:+	BUD23	excluded
isoform1=junction:chr7:73737111-73737561:-|isoform2=junction:chr7:73737392-73737561:-@exon:chr7:73737221-73737391:-@junction:chr7:73737111-73737220:-	ABHD11	included
isoform1=junction:chr7:73737736-73738327:-|isoform2=junction:chr7:73738143-73738327:-@exon:chr7:73737876-73738142:-@junction:chr7:73737736-73737875:-	ABHD11	excluded
isoform1=junction:chr7:74716951-74728785:+|isoform2=junction:chr7:74716951-74718878:+@exon:chr7:74718879-74718941:+@junction:chr7:74718942-74728785:+	GTF2I	multimodal
isoform1=junction:chr7:99458356-99460085:-|isoform2=junction:chr7:99459264-99460085:-@exon:chr7:99459147-99459263:-@junction:chr7:99458356-99459146:-	ATP5J2	included
isoform1=junction:chr7:99967287-99971745:-|isoform2=junction:chr7:99968431-99971745:-@exon:chr7:99968155-99968430:-@junction:chr7:99967287-99968154:-	AZGP1	included
isoform1=junction:chr8:100925040-100951928:-|isoform2=junction:chr8:100948901-100951928:-@exon:chr8:100948596-100948900:-@junction:chr8:100925040-100948595:-	YWHAZ	included
isoform1=junction:chr8:102843748-102858012:-|isoform2=junction:chr8:102850145-102858012:-@exon:chr8:102849999-102850144:-@junction:chr8:102843748-102849998:-	AZIN1	multimodal
isoform1=junction:chr8:102843748-102858012:-|isoform2=junction:chr8:102850166-102858012:-@exon:chr8:102849999-102850165:-@junction:chr8:102843748-102849998:-	AZIN1	multimodal
isoform1=junction:chr8:116658981-116755665:-|isoform2=junction:chr8:116726173-116755665:-@exon:chr8:116726016-116726172:-@junction:chr8:116658981-116726015:-	EIF3H	included
isoform1=junction:chr8:120425367-120443184:-|isoform2=junction:chr8:120432124-120443184:-@exon:chr8:120432030-120432123:-@junction:chr8:120425367-120432029:-	MRPL13	included
isoform1=junction:chr8:120432124-120445067:-|isoform2=junction:chr8:120443309-120445067:-@exon:chr8:120443185-120443308:-@junction:chr8:120432124-120443184:-	MRPL13	included
isoform1=junction:chr8:123430034-123436452:+|isoform2=junction:chr8:123430034-123435441:+@exon:chr8:123435442-123435542:+@junction:chr8:123435543-123436452:+	WDYHV1	excluded
isoform1=junction:chr8:129871497-129903311:-|isoform2=junction:chr8:129879472-129903311:-@exon:chr8:129879389-129879471:-@junction:chr8:129871497-129879388:-	FAM49B	multimodal
isoform1=junction:chr8:143581329-143586728:-|isoform2=junction:chr8:143586291-143586728:-@exon:chr8:143586219-143586290:-@junction:chr8:143581329-143586218:-	EEF1D	included
isoform1=junction:chr8:143818535-143821596:-|isoform2=junction:chr8:143820717-143821596:-@exon:chr8:143820666-143820716:-@junction:chr8:143818535-143820665:-	PUF60	included
isoform1=junction:chr8:144098995-144099276:-|isoform2=junction:chr8:144099206-144099276:-@exon:chr8:144099081-144099205:-@junction:chr8:144098995-144099080:-	SHARPIN	multimodal
isoform1=junction:chr8:144412947-144413512:-|isoform2=junction:chr8:144413390-144413512:-@exon:chr8:144413237-144413389:-@junction:chr8:144412947-144413236:-	SLC39A4	included
isoform1=junction:chr8:144423923-144424214:-|isoform2=junction:chr8:144424133-144424214:-@exon:chr8:144424041-144424132:-@junction:chr8:144423923-144424040:-	VPS28	included
isoform1=junction:chr8:144790471-144791276:-|isoform2=junction:chr8:144790764-144791276:-@exon:chr8:144790678-144790763:-@junction:chr8:144790471-144790677:-	RPL8	excluded
isoform1=junction:chr8:30070060-30082846:-|isoform2=junction:chr8:30074056-30082846:-@exon:chr8:30073877-30074055:-@junction:chr8:30070060-30073876:-	SARAF	included
isoform1=junction:chr8:38163841-38171964:-|isoform2=junction:chr8:38169918-38171964:-@exon:chr8:38169802-38169917:-@junction:chr8:38163841-38169801:-	LSM1	included
isoform1=junction:chr8:39055773-39077227:+|isoform2=junction:chr8:39055773-39071297:+@exon:chr8:39071298-39071403:+@junction:chr8:39071404-39077227:+	ADAM9	included
isoform1=junction:chr8:39082722-39090046:+|isoform2=junction:chr8:39082722-39082967:+@exon:chr8:39082968-39083073:+@junction:chr8:39083074-39090046:+	ADAM9	bimodal
isoform1=junction:chr8:42395134-42398711:+|isoform2=junction:chr8:42395134-42396677:+@exon:chr8:42396678-42396680:+@junction:chr8:42396681-42398711:+	VDAC3	excluded
isoform1=junction:chr8:60558924-60584207:+|isoform2=junction:chr8:60558924-60572045:+@exon:chr8:60572046-60572113:+@junction:chr8:60572114-60584207:+	RAB2A	included
isoform1=junction:chr8:61643434-61644599:-|isoform2=junction:chr8:61644002-61644599:-@exon:chr8:61643945-61644001:-@junction:chr8:61643434-61643944:-	ASPH	multimodal
isoform1=junction:chr8:61644633-61651049:-|isoform2=junction:chr8:61646879-61651049:-@exon:chr8:61646750-61646878:-@junction:chr8:61644633-61646749:-	ASPH	multimodal
isoform1=junction:chr8:66922393-66925436:-|isoform2=junction:chr8:66922726-66925436:-@exon:chr8:66922614-66922725:-@junction:chr8:66922393-66922613:-	SNHG6	included
isoform1=junction:chr8:70598012-70600018:-|isoform2=junction:chr8:70598256-70600018:-@exon:chr8:70598134-70598255:-@junction:chr8:70598012-70598133:-	TRAM1	included
isoform1=junction:chr8:85214632-85217385:-|isoform2=junction:chr8:85215038-85217385:-@exon:chr8:85214921-85215037:-@junction:chr8:85214632-85214920:-	C8orf59	multimodal
isoform1=junction:chr8:85217503-85220305:-|isoform2=junction:chr8:85219361-85220305:-@exon:chr8:85219236-85219360:-@junction:chr8:85217503-85219235:-	C8orf59	excluded
isoform1=junction:chr8:85217503-85220305:-|isoform2=junction:chr8:85219364-85220305:-@exon:chr8:85219323-85219363:-@junction:chr8:85217503-85219322:-	C8orf59	multimodal
isoform1=junction:chr8:86480333-86486483:-|isoform2=junction:chr8:86484962-86486483:-@exon:chr8:86484872-86484961:-@junction:chr8:86480333-86484871:-	RMDN1	multimodal
isoform1=junction:chr8:95035577-95041569:+|isoform2=junction:chr8:95035577-95036301:+@exon:chr8:95036302-95036494:+@junction:chr8:95036495-95041569:+	NDUFAF6	excluded
isoform1=junction:chr8:97691189-97706625:+|isoform2=junction:chr8:97691189-97699753:+@exon:chr8:97699754-97699852:+@junction:chr8:97699853-97706625:+	MTDH	included
isoform1=junction:chr9:111914747-111922848:+|isoform2=junction:chr9:111914747-111915758:+@exon:chr9:111915759-111915836:+@junction:chr9:111915837-111922848:+	UGCG	excluded
isoform1=junction:chr9:112234898-112252677:-|isoform2=junction:chr9:112251104-112252677:-@exon:chr9:112250929-112251103:-@junction:chr9:112234898-112250928:-	PTBP3	included
isoform1=junction:chr9:121268220-121301962:+|isoform2=junction:chr9:121268220-121281469:+@exon:chr9:121281470-121281562:+@junction:chr9:121281563-121301962:+	GSN	included
isoform1=junction:chr9:122148278-122159626:-|isoform2=junction:chr9:122152409-122159626:-@exon:chr9:122152245-122152408:-@junction:chr9:122148278-122152244:-	NDUFA8	included
isoform1=junction:chr9:124384657-124412351:-|isoform2=junction:chr9:124405433-124412351:-@exon:chr9:124405317-124405432:-@junction:chr9:124384657-124405316:-	PSMB7	included
isoform1=junction:chr9:127449363-127450730:-|isoform2=junction:chr9:127449709-127450730:-@exon:chr9:127449610-127449708:-@junction:chr9:127449363-127449609:-	RPL12	included
isoform1=junction:chr9:128635260-128636280:-|isoform2=junction:chr9:128635768-128636280:-@exon:chr9:128635658-128635767:-@junction:chr9:128635260-128635657:-	WDR34	included
isoform1=junction:chr9:133357815-133360264:+|isoform2=junction:chr9:133357815-133359949:+@exon:chr9:133359950-133360129:+@junction:chr9:133360130-133360264:+	SURF2	included
isoform1=junction:chr9:136674808-136676960:-|isoform2=junction:chr9:136676681-136676960:-@exon:chr9:136676585-136676680:-@junction:chr9:136674808-136676584:-	AGPAT2	included
isoform1=junction:chr9:136850138-136850754:+|isoform2=junction:chr9:136850138-136850502:+@exon:chr9:136850503-136850560:+@junction:chr9:136850561-136850754:+	PHPT1	excluded
isoform1=junction:chr9:136850138-136850754:+|isoform2=junction:chr9:136850138-136850505:+@exon:chr9:136850506-136850560:+@junction:chr9:136850561-136850754:+	PHPT1	excluded
isoform1=junction:chr9:32491421-32493760:-|isoform2=junction:chr9:32492539-32493760:-@exon:chr9:32492391-32492538:-@junction:chr9:32491421-32492390:-	DDX58	included
isoform1=junction:chr9:32553945-32570959:-|isoform2=junction:chr9:32558955-32570959:-@exon:chr9:32558910-32558954:-@junction:chr9:32553945-32558909:-	NDUFB6	included
isoform1=junction:chr9:32558955-32572880:-|isoform2=junction:chr9:32571053-32572880:-@exon:chr9:32570960-32571052:-@junction:chr9:32558955-32570959:-	NDUFB6	included
isoform1=junction:chr9:33026617-33029884:+|isoform2=junction:chr9:33026617-33026812:+@exon:chr9:33026813-33026990:+@junction:chr9:33026991-33029884:+	DNAJA1	included
isoform1=junction:chr9:35717787-35718811:-|isoform2=junction:chr9:35718407-35718811:-@novel_exon:chr9:35718356-35718406:-@junction:chr9:35717787-35718355:-	TLN1	excluded
isoform1=junction:chr9:36197589-36204067:+|isoform2=junction:chr9:36197589-36198978:+@exon:chr9:36198979-36199096:+@junction:chr9:36199097-36204067:+	CLTA	included
isoform1=junction:chr9:83973400-83974516:-|isoform2=junction:chr9:83973974-83974516:-@exon:chr9:83973902-83973973:-@junction:chr9:83973400-83973901:-	HNRNPK	included
isoform1=junction:chr9:83974590-83976994:-|isoform2=junction:chr9:83975506-83976994:-@exon:chr9:83975462-83975505:-@junction:chr9:83974590-83975461:-	HNRNPK	included
isoform1=junction:chr9:86046573-86077411:-|isoform2=junction:chr9:86052592-86077411:-@exon:chr9:86052537-86052591:-@junction:chr9:86046573-86052536:-	GOLM1	included
isoform1=junction:chr9:93110722-93112217:+|isoform2=junction:chr9:93110722-93111878:+@exon:chr9:93111879-93111938:+@junction:chr9:93111939-93112217:+	CARD19	multimodal
isoform1=junction:chr9:96641887-96651389:-|isoform2=junction:chr9:96646025-96651389:-@exon:chr9:96645893-96646024:-@junction:chr9:96641887-96645892:-	AAED1	multimodal
isoform1=junction:chr9:97910617-97913400:-|isoform2=junction:chr9:97912976-97913400:-@exon:chr9:97912873-97912975:-@junction:chr9:97910617-97912872:-	TRMO	bimodal
isoform1=junction:chrX:103356607-103357614:+|isoform2=junction:chrX:103356607-103357082:+@exon:chrX:103357083-103357161:+@junction:chrX:103357162-103357614:+	TCEAL9	multimodal
isoform1=junction:chrX:103677052-103685170:-|isoform2=junction:chrX:103678601-103685170:-@exon:chrX:103678499-103678600:-@junction:chrX:103677052-103678498:-	MORF4L2	included
isoform1=junction:chrX:103677052-103685170:-|isoform2=junction:chrX:103678652-103685170:-@exon:chrX:103678499-103678651:-@junction:chrX:103677052-103678498:-	MORF4L2	included
isoform1=junction:chrX:111685104-111687886:+|isoform2=junction:chrX:111685104-111686136:+@exon:chrX:111686137-111686174:+@junction:chrX:111686175-111687886:+	ALG13	excluded
isoform1=junction:chrX:119575401-119582587:+|isoform2=junction:chrX:119575401-119581506:+@exon:chrX:119581507-119581596:+@junction:chrX:119581597-119582587:+	UBE2A	multimodal
isoform1=junction:chrX:13735347-13736477:+|isoform2=junction:chrX:13735347-13736107:+@exon:chrX:13736108-13736296:+@junction:chrX:13736297-13736477:+	OFD1	excluded
isoform1=junction:chrX:153786450-153787050:-|isoform2=junction:chrX:153786948-153787050:-@exon:chrX:153786801-153786947:-@junction:chrX:153786450-153786800:-	IDH3G	included
isoform1=junction:chrX:153796553-153797724:+|isoform2=junction:chrX:153796553-153797457:+@exon:chrX:153797458-153797532:+@junction:chrX:153797533-153797724:+	SSR4	included
isoform1=junction:chrX:154399942-154400701:+|isoform2=junction:chrX:154399942-154400463:+@exon:chrX:154400464-154400626:+@junction:chrX:154400627-154400701:+	RPL10	included
isoform1=junction:chrX:21940874-21971896:+|isoform2=junction:chrX:21940874-21967195:+@exon:chrX:21967196-21967316:+@junction:chrX:21967317-21971896:+	SMS	included
isoform1=junction:chrX:23783710-23784364:+@novel_exon:chrX:23784365-23784403:+@junction:chrX:23784404-23785327:+|isoform2=junction:chrX:23783710-23783799:+@exon:chrX:23783800-23783883:+@junction:chrX:23783884-23785327:+	SAT1	included
isoform1=junction:chrX:23783710-23785327:+|isoform2=junction:chrX:23783710-23783799:+@exon:chrX:23783800-23783883:+@junction:chrX:23783884-23785327:+	SAT1	included
isoform1=junction:chrX:23783884-23785327:+|isoform2=junction:chrX:23783884-23784293:+@exon:chrX:23784294-23784403:+@junction:chrX:23784404-23785327:+	SAT1	excluded
isoform1=junction:chrX:40591366-40597526:+|isoform2=junction:chrX:40591366-40597248:+@exon:chrX:40597249-40597344:+@junction:chrX:40597345-40597526:+	ATP6AP2	included
isoform1=junction:chrX:48575284-48576313:+|isoform2=junction:chrX:48575284-48575560:+@exon:chrX:48575561-48575667:+@junction:chrX:48575668-48576313:+	RBM3	included
isoform1=junction:chrX:48902043-48902731:+|isoform2=junction:chrX:48902043-48902232:+@exon:chrX:48902233-48902517:+@junction:chrX:48902518-48902731:+	PQBP1	multimodal
isoform1=junction:chrX:76175614-76177615:+|isoform2=junction:chrX:76175614-76176880:+@exon:chrX:76176881-76176992:+@junction:chrX:76176993-76177615:+	PBDC1	included

## Sheet: SRP133387_SingleCTCs
ASE_ID	Gene_Symbol	Modality
isoform1=junction:chr10:102481173-102482000:-|isoform2=junction:chr10:102481899-102482000:-@exon:chr10:102481837-102481898:-@junction:chr10:102481173-102481836:-	ACTR1A	included
isoform1=junction:chr10:103392467-103396408:-|isoform2=junction:chr10:103394395-103396408:-@exon:chr10:103394199-103394394:-@junction:chr10:103392467-103394198:-	USMG5	excluded
isoform1=junction:chr10:118336424-118342269:-|isoform2=junction:chr10:118341928-118342269:-@exon:chr10:118341727-118341927:-@junction:chr10:118336424-118341726:-	FAM204A	multimodal
isoform1=junction:chr10:22318169-22318652:+|isoform2=junction:chr10:22318169-22318271:+@exon:chr10:22318272-22318306:+@junction:chr10:22318307-22318652:+	COMMD3	bimodal
isoform1=junction:chr10:27509931-27532506:+|isoform2=junction:chr10:27509931-27526827:+@exon:chr10:27526828-27526889:+@junction:chr10:27526890-27532506:+	RAB18	included
isoform1=junction:chr10:3779591-3781640:-|isoform2=junction:chr10:3780230-3781640:-@exon:chr10:3780106-3780229:-@junction:chr10:3779591-3780105:-	KLF6	included
isoform1=junction:chr10:3782215-3784912:-|isoform2=junction:chr10:3783282-3784912:-@exon:chr10:3783216-3783281:-@junction:chr10:3782215-3783215:-	KLF6	excluded
isoform1=junction:chr10:5786051-5796762:-|isoform2=junction:chr10:5795020-5796762:-@exon:chr10:5794885-5795019:-@junction:chr10:5786051-5794884:-	GDI2	included
isoform1=junction:chr10:58361402-58363608:+|isoform2=junction:chr10:58361402-58361494:+@exon:chr10:58361495-58361526:+@junction:chr10:58361527-58363608:+	UBE2D1	multimodal
isoform1=junction:chr10:63217332-63264650:-|isoform2=junction:chr10:63219984-63264650:-@exon:chr10:63219878-63219983:-@junction:chr10:63217332-63219877:-	JMJD1C	multimodal
isoform1=junction:chr10:68737049-68740628:+|isoform2=junction:chr10:68737049-68737844:+@exon:chr10:68737845-68737889:+@junction:chr10:68737890-68740628:+	CCAR1	included
isoform1=junction:chr10:69088237-69103870:+|isoform2=junction:chr10:69088237-69097083:+@exon:chr10:69097084-69097231:+@junction:chr10:69097232-69103870:+	SRGN	included
isoform1=junction:chr10:71822008-71825836:-|isoform2=junction:chr10:71823897-71825836:-@exon:chr10:71823888-71823896:-@junction:chr10:71822008-71823887:-	PSAP	multimodal
isoform1=junction:chr10:73911613-73912214:+|isoform2=junction:chr10:73911613-73912040:+@exon:chr10:73912041-73912068:+@junction:chr10:73912069-73912214:+	PLAU	included
isoform1=junction:chr10:86968606-86970475:+|isoform2=junction:chr10:86968606-86970199:+@exon:chr10:86970200-86970262:+@junction:chr10:86970263-86970475:+	ADIRF	included
isoform1=junction:chr10:87715844-87727283:+|isoform2=junction:chr10:87715844-87721755:+@exon:chr10:87721756-87721770:+@junction:chr10:87721771-87727283:+	PAPSS2	excluded
isoform1=junction:chr10:92311338-92349348:+|isoform2=junction:chr10:92311338-92340672:+@exon:chr10:92340673-92340803:+@junction:chr10:92340804-92349348:+	MARCH5	bimodal
isoform1=junction:chr10:95238686-95263863:-|isoform2=junction:chr10:95247367-95263863:-@exon:chr10:95247215-95247366:-@junction:chr10:95238686-95247214:-	PDLIM1	bimodal
isoform1=junction:chr1:110406380-110407585:-|isoform2=junction:chr1:110407129-110407585:-@exon:chr1:110407033-110407128:-@junction:chr1:110406380-110407032:-	LAMTOR5	excluded
isoform1=junction:chr11:10801088-10802048:-|isoform2=junction:chr11:10801775-10802048:-@exon:chr11:10801661-10801774:-@junction:chr11:10801088-10801660:-	EIF4G2	included
isoform1=junction:chr11:108134317-108138897:+|isoform2=junction:chr11:108134317-108135141:+@exon:chr11:108135142-108135242:+@junction:chr11:108135243-108138897:+	ACAT1	bimodal
isoform1=junction:chr1:111120694-111126226:-|isoform2=junction:chr1:111124882-111126226:-@exon:chr1:111124742-111124881:-@junction:chr1:111120694-111124741:-	DRAM2	included
isoform1=junction:chr1:111449874-111456085:+|isoform2=junction:chr1:111449874-111454210:+@exon:chr1:111454211-111454356:+@junction:chr1:111454357-111456085:+	ATP5F1	included
isoform1=junction:chr11:118572551-118583178:+|isoform2=junction:chr11:118572551-118581245:+@exon:chr11:118581246-118581509:+@junction:chr11:118581510-118583178:+	ARCN1	included
isoform1=junction:chr11:123060269-123061119:-|isoform2=junction:chr11:123060799-123061119:-@exon:chr11:123060593-123060798:-@junction:chr11:123060269-123060592:-	HSPA8	included
isoform1=junction:chr1:112703807-112707077:-|isoform2=junction:chr1:112705169-112707077:-@exon:chr1:112705100-112705168:-@junction:chr1:112703807-112705099:-	RHOC	multimodal
isoform1=junction:chr11:17282944-17295323:+|isoform2=junction:chr11:17282944-17286633:+@exon:chr11:17286634-17286717:+@junction:chr11:17286718-17295323:+	NUCB2	bimodal
isoform1=junction:chr11:18516165-18526774:-|isoform2=junction:chr11:18519604-18526774:-@exon:chr11:18519519-18519603:-@junction:chr11:18516165-18519518:-	TSG101	multimodal
isoform1=junction:chr1:119752675-119755426:-|isoform2=junction:chr1:119753387-119755426:-@exon:chr1:119753280-119753386:-@junction:chr1:119752675-119753279:-	HMGCS2	included
isoform1=junction:chr11:319991-320564:-|isoform2=junction:chr11:320249-320564:-@exon:chr11:320113-320248:-@junction:chr11:319991-320112:-	IFITM3	excluded
isoform1=junction:chr11:33722464-33736381:-|isoform2=junction:chr11:33731469-33736381:-@exon:chr11:33731424-33731468:-@junction:chr11:33722464-33731423:-	CD59	multimodal
isoform1=junction:chr11:34090679-34096478:+|isoform2=junction:chr11:34090679-34091905:+@exon:chr11:34091906-34092056:+@junction:chr11:34092057-34096478:+	CAPRIN1	included
isoform1=junction:chr11:35190066-35209964:+|isoform2=junction:chr11:35190066-35208104:+@exon:chr11:35208105-35208206:+@junction:chr11:35208207-35209964:+	CD44	included
isoform1=junction:chr11:35210055-35214851:+|isoform2=junction:chr11:35210055-35211245:+@exon:chr11:35211246-35211449:+@junction:chr11:35211450-35214851:+	CD44	included
isoform1=junction:chr11:47565987-47571470:+|isoform2=junction:chr11:47565987-47569699:+@exon:chr11:47569700-47569891:+@junction:chr11:47569892-47571470:+	NDUFS3	multimodal
isoform1=junction:chr11:47629047-47631035:-|isoform2=junction:chr11:47630615-47631035:-@exon:chr11:47630555-47630614:-@junction:chr11:47629047-47630554:-	MTCH2	included
isoform1=junction:chr11:47634735-47638698:-|isoform2=junction:chr11:47635572-47638698:-@exon:chr11:47635545-47635571:-@junction:chr11:47634735-47635544:-	MTCH2	included
isoform1=junction:chr1:150267790-150268697:-|isoform2=junction:chr1:150268128-150268697:-@exon:chr1:150267957-150268127:-@junction:chr1:150267790-150267956:-	APH1A	included
isoform1=junction:chr1:150325882-150328319:+|isoform2=junction:chr1:150325882-150327556:+@exon:chr1:150327557-150327652:+@junction:chr1:150327653-150328319:+	PRPF3	multimodal
isoform1=junction:chr1:150577492-150578842:-|isoform2=junction:chr1:150578492-150578842:-@exon:chr1:150578244-150578491:-@junction:chr1:150577492-150578243:-	MCL1	multimodal
isoform1=junction:chr1:151055994-151059478:-|isoform2=junction:chr1:151056787-151059478:-@exon:chr1:151056651-151056786:-@junction:chr1:151055994-151056650:-	CDC42SE1	excluded
isoform1=junction:chr1:151055994-151059478:-|isoform2=junction:chr1:151056787-151059478:-@exon:chr1:151056656-151056786:-@junction:chr1:151055994-151056655:-	CDC42SE1	excluded
isoform1=junction:chr1:153544810-153545752:-|isoform2=junction:chr1:153545519-153545752:-@exon:chr1:153545470-153545518:-@junction:chr1:153544810-153545469:-	S100A4	excluded
isoform1=junction:chr1:153615023-153615828:-|isoform2=junction:chr1:153615382-153615828:-@exon:chr1:153615235-153615381:-@junction:chr1:153615023-153615234:-	S100A14	included
isoform1=junction:chr1:153975906-153976975:-|isoform2=junction:chr1:153976776-153976975:-@exon:chr1:153976693-153976775:-@junction:chr1:153975906-153976692:-	JTB	included
isoform1=junction:chr1:153990803-153991114:+|isoform2=junction:chr1:153990803-153990913:+@exon:chr1:153990914-153991034:+@junction:chr1:153991035-153991114:+	RPS27	excluded
isoform1=junction:chr1:154157722-154170399:-|isoform2=junction:chr1:154169384-154170399:-@exon:chr1:154169305-154169383:-@junction:chr1:154157722-154169304:-	TPM3	excluded
isoform1=junction:chr1:154173202-154182987:-|isoform2=junction:chr1:154176249-154182987:-@exon:chr1:154176115-154176248:-@junction:chr1:154173202-154176114:-	TPM3	included
isoform1=junction:chr1:154212625-154214456:-|isoform2=junction:chr1:154213947-154214456:-@exon:chr1:154213893-154213946:-@junction:chr1:154212625-154213892:-	C1orf43	included
isoform1=junction:chr1:154214575-154220341:-|isoform2=junction:chr1:154219938-154220341:-@exon:chr1:154219836-154219937:-@junction:chr1:154214575-154219835:-	C1orf43	multimodal
isoform1=junction:chr1:155052778-155053909:+|isoform2=junction:chr1:155052778-155053416:+@exon:chr1:155053417-155053493:+@junction:chr1:155053494-155053909:+	ADAM15	included
isoform1=junction:chr1:155053989-155054313:+|isoform2=junction:chr1:155053989-155054149:+@exon:chr1:155054150-155054226:+@junction:chr1:155054227-155054313:+	ADAM15	included
isoform1=junction:chr1:155131635-155133729:+|isoform2=junction:chr1:155131635-155133502:+@exon:chr1:155133503-155133568:+@junction:chr1:155133569-155133729:+	EFNA1	multimodal
isoform1=junction:chr1:155136377-155137560:+|isoform2=junction:chr1:155136377-155136827:+@exon:chr1:155136828-155136951:+@junction:chr1:155136952-155137560:+	SLC50A1	included
isoform1=junction:chr1:155136952-155137978:+|isoform2=junction:chr1:155136952-155137560:+@exon:chr1:155137561-155137722:+@junction:chr1:155137723-155137978:+	SLC50A1	included
isoform1=junction:chr1:155187375-155187721:-|isoform2=junction:chr1:155187577-155187721:-@exon:chr1:155187455-155187576:-@junction:chr1:155187375-155187454:-	MUC1	included
isoform1=junction:chr1:155210628-155212384:+|isoform2=junction:chr1:155210628-155212126:+@exon:chr1:155212127-155212219:+@junction:chr1:155212220-155212384:+	MTX1	included
isoform1=junction:chr1:155260660-155262085:-|isoform2=junction:chr1:155261735-155262085:-@exon:chr1:155261657-155261734:-@junction:chr1:155260660-155261656:-	SCAMP3	multimodal
isoform1=junction:chr1:155318292-155318855:+|isoform2=junction:chr1:155318292-155318664:+@exon:chr1:155318665-155318753:+@junction:chr1:155318754-155318855:+	FDPS	included
isoform1=junction:chr1:155319689-155320408:+|isoform2=junction:chr1:155319689-155319793:+@exon:chr1:155319794-155319928:+@junction:chr1:155319929-155320408:+	FDPS	included
isoform1=junction:chr1:156061444-156068269:+|isoform2=junction:chr1:156061444-156065910:+@exon:chr1:156065911-156066106:+@junction:chr1:156066107-156068269:+	RAB25	bimodal
isoform1=junction:chr1:156115275-156134402:+|isoform2=junction:chr1:156115275-156130616:+@exon:chr1:156130617-156130773:+@junction:chr1:156130774-156134402:+	LMNA	included
isoform1=junction:chr1:156232426-156236287:+|isoform2=junction:chr1:156232426-156233627:+@exon:chr1:156233628-156233728:+@junction:chr1:156233729-156236287:+	PMF1	bimodal
isoform1=junction:chr1:156744349-156745007:-|isoform2=junction:chr1:156744571-156745007:-@exon:chr1:156744501-156744570:-@junction:chr1:156744349-156744500:-	HDGF	excluded
isoform1=junction:chr11:57737669-57738353:+|isoform2=junction:chr11:57737669-57737912:+@exon:chr11:57737913-57738026:+@junction:chr11:57738027-57738353:+	TMX2	multimodal
isoform1=junction:chr11:58838369-58844433:-|isoform2=junction:chr11:58839653-58844433:-@exon:chr11:58839535-58839652:-@junction:chr11:58838369-58839534:-	GLYATL2	included
isoform1=junction:chr11:60903862-60906363:-|isoform2=junction:chr11:60905453-60906363:-@exon:chr11:60905365-60905452:-@junction:chr11:60903862-60905364:-	PRPF19	excluded
isoform1=junction:chr1:161038076-161038879:-|isoform2=junction:chr1:161038635-161038879:-@novel_exon:chr1:161038551-161038634:-@junction:chr1:161038076-161038550:-	TSTD1	multimodal
isoform1=junction:chr1:161038076-161038879:-|isoform2=junction:chr1:161038674-161038879:-@exon:chr1:161038551-161038673:-@junction:chr1:161038076-161038550:-	TSTD1	included
isoform1=junction:chr1:161072886-161073719:-|isoform2=junction:chr1:161073300-161073719:-@exon:chr1:161073225-161073299:-@junction:chr1:161072886-161073224:-	NECTIN4	multimodal
isoform1=junction:chr1:161073796-161074610:-|isoform2=junction:chr1:161074374-161074610:-@exon:chr1:161074217-161074373:-@junction:chr1:161073796-161074216:-	NECTIN4	included
isoform1=junction:chr1:161157018-161157616:+|isoform2=junction:chr1:161157018-161157253:+@exon:chr1:161157254-161157317:+@junction:chr1:161157318-161157616:+	UFC1	included
isoform1=junction:chr1:161157694-161158411:+|isoform2=junction:chr1:161157694-161158120:+@exon:chr1:161158121-161158211:+@junction:chr1:161158212-161158411:+	UFC1	included
isoform1=junction:chr1:161340656-161362328:+|isoform2=junction:chr1:161340656-161356676:+@exon:chr1:161356677-161356840:+@junction:chr1:161356841-161362328:+	SDHC	included
isoform1=junction:chr11:62633515-62634820:-|isoform2=junction:chr11:62634376-62634820:-@exon:chr11:62634310-62634375:-@junction:chr11:62633515-62634309:-	GANAB	excluded
isoform1=junction:chr11:62789427-62789885:+|isoform2=junction:chr11:62789427-62789600:+@exon:chr11:62789601-62789679:+@junction:chr11:62789680-62789885:+	TMEM179B	included
isoform1=junction:chr11:62853834-62854518:-|isoform2=junction:chr11:62854065-62854518:-@exon:chr11:62854018-62854064:-@junction:chr11:62853834-62854017:-	SNHG1	included
isoform1=junction:chr11:64227133-64227567:+|isoform2=junction:chr11:64227133-64227400:+@exon:chr11:64227401-64227493:+@junction:chr11:64227494-64227567:+	NUDT22	bimodal
isoform1=junction:chr11:64318387-64320660:+|isoform2=junction:chr11:64318387-64319733:+@exon:chr11:64319734-64319868:+@junction:chr11:64319869-64320660:+	PRDX5	included
isoform1=junction:chr11:64319869-64320864:+|isoform2=junction:chr11:64319869-64320660:+@exon:chr11:64320661-64320792:+@junction:chr11:64320793-64320864:+	PRDX5	included
isoform1=junction:chr11:6478960-6479971:-|isoform2=junction:chr11:6479259-6479971:-@exon:chr11:6479140-6479258:-@junction:chr11:6478960-6479139:-	ARFIP2	included
isoform1=junction:chr1:165651088-165654278:+|isoform2=junction:chr1:165651088-165651977:+@exon:chr1:165651978-165652035:+@junction:chr1:165652036-165654278:+	MGST3	included
isoform1=junction:chr11:65855449-65855934:-|isoform2=junction:chr11:65855731-65855934:-@exon:chr11:65855654-65855730:-@junction:chr11:65855449-65855653:-	CFL1	included
isoform1=junction:chr11:66337890-66338720:-|isoform2=junction:chr11:66338283-66338720:-@exon:chr11:66338243-66338282:-@junction:chr11:66337890-66338242:-	BRMS1	included
isoform1=junction:chr11:66640124-66646026:+|isoform2=junction:chr11:66640124-66643449:+@exon:chr11:66643450-66644140:+@junction:chr11:66644141-66646026:+	RBM14-RBM4	multimodal
isoform1=junction:chr11:67583845-67584463:+|isoform2=junction:chr11:67583845-67584133:+@exon:chr11:67584134-67584169:+@junction:chr11:67584170-67584463:+	GSTP1	included
isoform1=junction:chr1:167773369-167787819:+|isoform2=junction:chr1:167773369-167776063:+@exon:chr1:167776064-167776166:+@junction:chr1:167776167-167787819:+	MPZL1	included
isoform1=junction:chr1:168231920-168236588:+|isoform2=junction:chr1:168231920-168235100:+@exon:chr1:168235101-168235182:+@junction:chr1:168235183-168236588:+	SFT2D2	bimodal
isoform1=junction:chr11:70108405-70111706:+|isoform2=junction:chr11:70108405-70111125:+@exon:chr11:70111126-70111191:+@junction:chr11:70111192-70111706:+	ANO1	bimodal
isoform1=junction:chr11:70420511-70422939:+|isoform2=junction:chr11:70420511-70421469:+@exon:chr11:70421470-70421580:+@junction:chr11:70421581-70422939:+	CTTN	multimodal
isoform1=junction:chr11:72755754-72758529:-|isoform2=junction:chr11:72757885-72758529:-@exon:chr11:72757767-72757884:-@junction:chr11:72755754-72757766:-	STARD10	included
isoform1=junction:chr11:73677963-73707419:-|isoform2=junction:chr11:73679721-73707419:-@exon:chr11:73679654-73679720:-@junction:chr11:73677963-73679653:-	RAB6A	included
isoform1=junction:chr11:73718719-73720845:-@exon:chr11:73718613-73718718:-@junction:chr11:73716363-73718612:-|isoform2=junction:chr11:73718891-73720845:-@exon:chr11:73718785-73718890:-@junction:chr11:73716363-73718784:-	RAB6A	multimodal
isoform1=junction:chr1:173864305-173864674:-|isoform2=junction:chr1:173864507-173864674:-@exon:chr1:173864484-173864506:-@junction:chr1:173864305-173864483:-	GAS5	included
isoform1=junction:chr1:173864305-173865228:-|isoform2=junction:chr1:173864705-173865228:-@exon:chr1:173864484-173864704:-@junction:chr1:173864305-173864483:-	GAS5	included
isoform1=junction:chr1:173864305-173865228:-|isoform2=junction:chr1:173864705-173865228:-@exon:chr1:173864675-173864704:-@junction:chr1:173864305-173864674:-	GAS5	included
isoform1=junction:chr1:173864705-173865470:-|isoform2=junction:chr1:173865283-173865470:-@exon:chr1:173865229-173865282:-@junction:chr1:173864705-173865228:-	GAS5	included
isoform1=junction:chr1:173864705-173865509:-|isoform2=junction:chr1:173865283-173865509:-@exon:chr1:173865229-173865282:-@junction:chr1:173864705-173865228:-	GAS5	included
isoform1=junction:chr11:73873395-73876756:-|isoform2=junction:chr11:73876576-73876756:-@exon:chr11:73876479-73876575:-@junction:chr11:73873395-73876478:-	COA4	excluded
isoform1=junction:chr11:73975122-73976640:-|isoform2=junction:chr11:73975672-73976640:-@exon:chr11:73975491-73975671:-@junction:chr11:73975122-73975490:-	UCP2	included
isoform1=junction:chr11:73976743-73977885:-|isoform2=junction:chr11:73977018-73977885:-@exon:chr11:73976823-73977017:-@junction:chr11:73976743-73976822:-	UCP2	included
isoform1=junction:chr11:75401734-75404019:+|isoform2=junction:chr11:75401734-75402351:+@exon:chr11:75402352-75402446:+@junction:chr11:75402447-75404019:+	RPS3	included
isoform1=junction:chr1:182854179-182856531:+|isoform2=junction:chr1:182854179-182855576:+@exon:chr1:182855577-182855713:+@junction:chr1:182855714-182856531:+	DHX9	bimodal
isoform1=junction:chr11:83261967-83273646:-|isoform2=junction:chr11:83265980-83273646:-@exon:chr11:83265865-83265979:-@junction:chr11:83261967-83265864:-	CCDC90B	multimodal
isoform1=junction:chr11:83274741-83280140:-|isoform2=junction:chr11:83278830-83280140:-@exon:chr11:83278726-83278829:-@junction:chr11:83274741-83278725:-	CCDC90B	multimodal
isoform1=junction:chr11:88326444-88334936:-|isoform2=junction:chr11:88328197-88334936:-@exon:chr11:88328112-88328196:-@junction:chr11:88326444-88328111:-	CTSC	multimodal
isoform1=junction:chr1:202013299-202013828:+|isoform2=junction:chr1:202013299-202013578:+@novel_exon:chr1:202013579-202013625:+@junction:chr1:202013626-202013828:+	ELF3	excluded
isoform1=junction:chr1:202013299-202013828:+|isoform2=junction:chr1:202013299-202013578:+@novel_exon:chr1:202013579-202013640:+@junction:chr1:202013641-202013828:+	ELF3	excluded
isoform1=junction:chr1:202333556-202335645:-|isoform2=junction:chr1:202335059-202335645:-@exon:chr1:202334989-202335058:-@junction:chr1:202333556-202334988:-	UBE2T	included
isoform1=junction:chr1:203861744-203863662:+|isoform2=junction:chr1:203861744-203862181:+@exon:chr1:203862182-203862222:+@junction:chr1:203862223-203863662:+	SNRPE	included
isoform1=junction:chr1:203862223-203865040:+|isoform2=junction:chr1:203862223-203863662:+@exon:chr1:203863663-203863725:+@junction:chr1:203863726-203865040:+	SNRPE	included
isoform1=junction:chr1:204542945-204546796:+|isoform2=junction:chr1:204542945-204544534:+@exon:chr1:204544535-204544684:+@junction:chr1:204544685-204546796:+	MDM4	multimodal
isoform1=junction:chr1:207767196-207767778:+|isoform2=junction:chr1:207767196-207767606:+@exon:chr1:207767607-207767651:+@junction:chr1:207767652-207767778:+	CD46	excluded
isoform1=junction:chr1:207767196-207770320:+@exon:chr1:207770321-207770362:+@junction:chr1:207770363-207783291:+|isoform2=junction:chr1:207767196-207767778:+@exon:chr1:207767779-207767823:+@junction:chr1:207767824-207783291:+	CD46	multimodal
isoform1=junction:chr1:207767196-207770320:+|isoform2=junction:chr1:207767196-207767778:+@exon:chr1:207767779-207767823:+@junction:chr1:207767824-207770320:+	CD46	multimodal
isoform1=junction:chr1:207767196-207783291:+|isoform2=junction:chr1:207767196-207767778:+@exon:chr1:207767779-207767823:+@junction:chr1:207767824-207783291:+	CD46	multimodal
isoform1=junction:chr1:207767196-207783291:+|isoform2=junction:chr1:207767196-207770320:+@exon:chr1:207770321-207770362:+@junction:chr1:207770363-207783291:+	CD46	included
isoform1=junction:chr1:207767824-207783291:+|isoform2=junction:chr1:207767824-207770320:+@exon:chr1:207770321-207770362:+@junction:chr1:207770363-207783291:+	CD46	included
isoform1=junction:chr1:207785683-207793518:+|isoform2=junction:chr1:207785683-207790252:+@exon:chr1:207790253-207790345:+@junction:chr1:207790346-207793518:+	CD46	excluded
isoform1=junction:chr12:103931624-103932825:+|isoform2=junction:chr12:103931624-103932276:+@exon:chr12:103932277-103932418:+@junction:chr12:103932419-103932825:+	HSP90B1	included
isoform1=junction:chr12:104319586-104325336:+|isoform2=junction:chr12:104319586-104321090:+@exon:chr12:104321091-104321316:+@junction:chr12:104321317-104325336:+	TXNRD1	included
isoform1=junction:chr12:10607937-10609830:-|isoform2=junction:chr12:10609384-10609830:-@exon:chr12:10609098-10609383:-@junction:chr12:10607937-10609097:-	MAGOHB	bimodal
isoform1=junction:chr12:10610681-10613438:-|isoform2=junction:chr12:10612979-10613438:-@exon:chr12:10612640-10612978:-@junction:chr12:10610681-10612639:-	MAGOHB	excluded
isoform1=junction:chr12:106956066-106967110:+|isoform2=junction:chr12:106956066-106957081:+@exon:chr12:106957082-106957149:+@junction:chr12:106957150-106967110:+	TMEM263	multimodal
isoform1=junction:chr12:110436205-110437083:-|isoform2=junction:chr12:110436684-110437083:-@exon:chr12:110436557-110436683:-@junction:chr12:110436205-110436556:-	ARPC3	included
isoform1=junction:chr12:110437153-110445451:-|isoform2=junction:chr12:110440389-110445451:-@exon:chr12:110440312-110440388:-@junction:chr12:110437153-110440311:-	ARPC3	included
isoform1=junction:chr12:110492123-110496011:-|isoform2=junction:chr12:110493232-110496011:-@exon:chr12:110492996-110493231:-@junction:chr12:110492123-110492995:-	VPS29	included
isoform1=junction:chr12:112013610-112022149:+|isoform2=junction:chr12:112013610-112019755:+@exon:chr12:112019756-112019894:+@junction:chr12:112019895-112022149:+	ERP29	multimodal
isoform1=junction:chr12:120197463-120198853:-|isoform2=junction:chr12:120198740-120198853:-@exon:chr12:120198554-120198739:-@junction:chr12:120197463-120198553:-	RPLP0	included
isoform1=junction:chr12:120199486-120201082:-|isoform2=junction:chr12:120200832-120201082:-@exon:chr12:120200730-120200831:-@junction:chr12:120199486-120200729:-	RPLP0	included
isoform1=junction:chr12:120566981-120575630:+|isoform2=junction:chr12:120566981-120571190:+@exon:chr12:120571191-120571291:+@junction:chr12:120571292-120575630:+	RNF10	included
isoform1=junction:chr12:121309864-121318276:-|isoform2=junction:chr12:121310012-121318276:-@exon:chr12:121309970-121310011:-@junction:chr12:121309864-121309969:-	ANAPC5	excluded
isoform1=junction:chr12:122522300-122526847:-|isoform2=junction:chr12:122522907-122526847:-@exon:chr12:122522799-122522906:-@junction:chr12:122522300-122522798:-	RSRC2	multimodal
isoform1=junction:chr1:212433121-212444338:+|isoform2=junction:chr1:212433121-212442564:+@exon:chr1:212442565-212442625:+@junction:chr1:212442626-212444338:+	NENF	included
isoform1=junction:chr1:212618235-212619357:+|isoform2=junction:chr1:212618235-212619045:+@exon:chr1:212619046-212619266:+@junction:chr1:212619267-212619357:+	ATF3	excluded
isoform1=junction:chr1:213051510-213077695:+|isoform2=junction:chr1:213051510-213071005:+@exon:chr1:213071006-213071041:+@junction:chr1:213071042-213077695:+	RPS6KC1	included
isoform1=junction:chr12:14882281-14884212:-|isoform2=junction:chr12:14883048-14884212:-@exon:chr12:14882972-14883047:-@junction:chr12:14882281-14882971:-	MGP	included
isoform1=junction:chr12:15882820-15889927:+|isoform2=junction:chr12:15882820-15883540:+@exon:chr12:15883541-15883676:+@junction:chr12:15883677-15889927:+	STRAP	multimodal
isoform1=junction:chr12:16354379-16363794:+|isoform2=junction:chr12:16354379-16357604:+@exon:chr12:16357605-16357699:+@junction:chr12:16357700-16363794:+	MGST1	included
isoform1=junction:chr12:16357700-16363794:+|isoform2=junction:chr12:16357700-16360299:+@exon:chr12:16360300-16360443:+@junction:chr12:16360444-16363794:+	MGST1	excluded
isoform1=junction:chr1:220069433-220073966:-|isoform2=junction:chr1:220072958-220073966:-@exon:chr1:220072850-220072957:-@junction:chr1:220069433-220072849:-	BPNT1	multimodal
isoform1=junction:chr1:222719360-222724091:+|isoform2=junction:chr1:222719360-222722418:+@exon:chr1:222722419-222722514:+@junction:chr1:222722515-222724091:+	BROX	bimodal
isoform1=junction:chr1:224183419-224192331:+|isoform2=junction:chr1:224183419-224189576:+@exon:chr1:224189577-224190319:+@junction:chr1:224190320-224192331:+	DEGS1	included
isoform1=junction:chr1:224308264-224317693:-|isoform2=junction:chr1:224311858-224317693:-@exon:chr1:224311800-224311857:-@junction:chr1:224308264-224311799:-	NVL	multimodal
isoform1=junction:chr1:224365992-224375794:+|isoform2=junction:chr1:224365992-224371282:+@exon:chr1:224371283-224371423:+@junction:chr1:224371424-224375794:+	CNIH4	included
isoform1=junction:chr12:27724187-27737538:+|isoform2=junction:chr12:27724187-27735446:+@exon:chr12:27735447-27735556:+@junction:chr12:27735557-27737538:+	MRPS35	included
isoform1=junction:chr1:228107870-228108234:-|isoform2=junction:chr1:228108138-228108234:-@exon:chr1:228107977-228108137:-@junction:chr1:228107870-228107976:-	MRPL55	excluded
isoform1=junction:chr1:228108319-228109148:-|isoform2=junction:chr1:228109022-228109148:-@exon:chr1:228108955-228109021:-@junction:chr1:228108319-228108954:-	MRPL55	multimodal
isoform1=junction:chr1:228140364-228145510:+|isoform2=junction:chr1:228140364-228141123:+@exon:chr1:228141124-228141288:+@junction:chr1:228141289-228145510:+	GUK1	multimodal
isoform1=junction:chr1:228141289-228145510:+|isoform2=junction:chr1:228141289-228141625:+@exon:chr1:228141626-228141829:+@junction:chr1:228141830-228145510:+	GUK1	excluded
isoform1=junction:chr1:228147700-228148664:+|isoform2=junction:chr1:228147700-228148370:+@exon:chr1:228148371-228148456:+@junction:chr1:228148457-228148664:+	GUK1	included
isoform1=junction:chr1:229299073-229303805:+|isoform2=junction:chr1:229299073-229302861:+@exon:chr1:229302862-229302989:+@junction:chr1:229302990-229303805:+	RAB4A	included
isoform1=junction:chr1:23321664-23333517:-|isoform2=junction:chr1:23323733-23333517:-@exon:chr1:23323556-23323732:-@junction:chr1:23321664-23323555:-	HNRNPR	included
isoform1=junction:chr1:23323733-23337753:-|isoform2=junction:chr1:23333632-23337753:-@exon:chr1:23333518-23333631:-@junction:chr1:23323733-23333517:-	HNRNPR	included
isoform1=junction:chr1:23798731-23799365:-|isoform2=junction:chr1:23799013-23799365:-@exon:chr1:23798887-23799012:-@junction:chr1:23798731-23798886:-	GALE	bimodal
isoform1=junction:chr1:2397221-2400856:+|isoform2=junction:chr1:2397221-2399414:+@exon:chr1:2399415-2399514:+@junction:chr1:2399515-2400856:+	RER1	included
isoform1=junction:chr12:42322447-42325923:-|isoform2=junction:chr12:42324105-42325923:-@exon:chr12:42324019-42324104:-@junction:chr12:42322447-42324018:-	ZCRB1	included
isoform1=junction:chr12:42375075-42387455:+|isoform2=junction:chr12:42375075-42384939:+@exon:chr12:42384940-42384996:+@junction:chr12:42384997-42387455:+	PPHLN1	multimodal
isoform1=junction:chr12:46367341-46370775:-|isoform2=junction:chr12:46370628-46370775:-@exon:chr12:46370512-46370627:-@junction:chr12:46367341-46370511:-	SLC38A2	multimodal
isoform1=junction:chr12:47965346-47966088:+|isoform2=junction:chr12:47965346-47965837:+@exon:chr12:47965838-47965997:+@junction:chr12:47965998-47966088:+	TMEM106C	included
isoform1=junction:chr12:48671963-48679654:-|isoform2=junction:chr12:48679151-48679654:-@exon:chr12:48679036-48679150:-@junction:chr12:48671963-48679035:-	KANSL2	multimodal
isoform1=junction:chr12:53295640-53297849:+|isoform2=junction:chr12:53295640-53295838:+@exon:chr12:53295839-53296275:+@junction:chr12:53296276-53297849:+	PFDN5	included
isoform1=junction:chr12:53295942-53297849:+|isoform2=junction:chr12:53295942-53296243:+@exon:chr12:53296244-53296275:+@junction:chr12:53296276-53297849:+	PFDN5	included
isoform1=junction:chr12:53303194-53306197:+|isoform2=junction:chr12:53303194-53305907:+@exon:chr12:53305908-53306060:+@junction:chr12:53306061-53306197:+	C12orf10	included
isoform1=junction:chr12:53467294-53468776:+|isoform2=junction:chr12:53467294-53467804:+@exon:chr12:53467805-53467843:+@junction:chr12:53467844-53468776:+	PCBP2	included
isoform1=junction:chr12:53669949-53676052:-|isoform2=junction:chr12:53672646-53676052:-@exon:chr12:53672576-53672645:-@junction:chr12:53669949-53672575:-	ATP5G2	included
isoform1=junction:chr12:54342288-54345459:+|isoform2=junction:chr12:54342288-54343224:+@exon:chr12:54343225-54343316:+@junction:chr12:54343317-54345459:+	COPZ1	included
isoform1=junction:chr12:54371097-54373972:-|isoform2=junction:chr12:54371716-54373972:-@exon:chr12:54371473-54371715:-@junction:chr12:54371097-54371472:-	ZNF385A	included
isoform1=junction:chr12:54854641-54856769:+|isoform2=junction:chr12:54854641-54855115:+@exon:chr12:54855116-54855157:+@junction:chr12:54855158-54856769:+	MUCL1	included
isoform1=junction:chr12:56116800-56117481:+|isoform2=junction:chr12:56116800-56117188:+@exon:chr12:56117189-56117211:+@junction:chr12:56117212-56117481:+	RPL41	included
isoform1=junction:chr12:56158712-56159974:+|isoform2=junction:chr12:56158712-56159586:+@exon:chr12:56159587-56159730:+@junction:chr12:56159731-56159974:+	MYL6	included
isoform1=junction:chr12:56160321-56161386:+|isoform2=junction:chr12:56160321-56160625:+@exon:chr12:56160626-56160670:+@junction:chr12:56160671-56161386:+	MYL6	excluded
isoform1=junction:chr12:56664801-56670274:-|isoform2=junction:chr12:56666267-56670274:-@exon:chr12:56666204-56666266:-@junction:chr12:56664801-56666203:-	PTGES3	included
isoform1=junction:chr12:56666267-56671748:-|isoform2=junction:chr12:56670365-56671748:-@exon:chr12:56670275-56670364:-@junction:chr12:56666267-56670274:-	PTGES3	included
isoform1=junction:chr12:57489559-57490206:+|isoform2=junction:chr12:57489559-57489895:+@exon:chr12:57489896-57489971:+@junction:chr12:57489972-57490206:+	MARS	included
isoform1=junction:chr12:57490380-57498156:+|isoform2=junction:chr12:57490380-57490537:+@exon:chr12:57490538-57490644:+@junction:chr12:57490645-57498156:+	MARS	included
isoform1=junction:chr12:57599212-57600323:+|isoform2=junction:chr12:57599212-57599399:+@exon:chr12:57599400-57599438:+@junction:chr12:57599439-57600323:+	PIP4K2C	included
isoform1=junction:chr12:57787163-57796176:+|isoform2=junction:chr12:57787163-57792985:+@exon:chr12:57792986-57793073:+@junction:chr12:57793074-57796176:+	TSFM	bimodal
isoform1=junction:chr12:64721706-64728955:-|isoform2=junction:chr12:64723114-64728955:-@exon:chr12:64723006-64723113:-@junction:chr12:64721706-64723005:-	GNS	included
isoform1=junction:chr12:66138167-66145840:-|isoform2=junction:chr12:66138770-66145840:-@exon:chr12:66138724-66138769:-@junction:chr12:66138167-66138723:-	TMBIM4	included
isoform1=junction:chr12:6849199-6849564:-|isoform2=junction:chr12:6849430-6849564:-@exon:chr12:6849323-6849429:-@junction:chr12:6849199-6849322:-	CDCA3	multimodal
isoform1=junction:chr12:68813629-68820324:+|isoform2=junction:chr12:68813629-68816811:+@exon:chr12:68816812-68816945:+@junction:chr12:68816946-68820324:+	MDM2	multimodal
isoform1=junction:chr12:70342169-70344127:+|isoform2=junction:chr12:70342169-70342257:+@exon:chr12:70342258-70342307:+@junction:chr12:70342308-70344127:+	CNOT2	included
isoform1=junction:chr12:71880608-71893221:+|isoform2=junction:chr12:71880608-71884810:+@exon:chr12:71884811-71885021:+@junction:chr12:71885022-71893221:+	TBC1D15	included
isoform1=junction:chr12:71893325-71894685:+|isoform2=junction:chr12:71893325-71894324:+@exon:chr12:71894325-71894375:+@junction:chr12:71894376-71894685:+	TBC1D15	multimodal
isoform1=junction:chr1:27330805-27332069:+|isoform2=junction:chr1:27330805-27330984:+@exon:chr1:27330985-27331137:+@junction:chr1:27331138-27332069:+	TMEM222	bimodal
isoform1=junction:chr12:75506400-75506781:-|isoform2=junction:chr12:75506610-75506781:-@exon:chr12:75506484-75506609:-@junction:chr12:75506400-75506483:-	KRR1	included
isoform1=junction:chr12:79613610-79621075:-|isoform2=junction:chr12:79614612-79621075:-@novel_exon:chr12:79614535-79614611:-@junction:chr12:79613610-79614534:-	PAWR	excluded
isoform1=junction:chr1:28738339-28768928:+|isoform2=junction:chr1:28738339-28742402:+@exon:chr1:28742403-28743986:+@junction:chr1:28743987-28768928:+	YTHDF2	included
isoform1=junction:chr1:29159487-29160374:-|isoform2=junction:chr1:29160059-29160374:-@exon:chr1:29159864-29160058:-@junction:chr1:29159487-29159863:-	SRSF4	bimodal
isoform1=junction:chr12:94971621-95002738:-|isoform2=junction:chr12:94994258-95002738:-@exon:chr12:94994170-94994257:-@junction:chr12:94971621-94994169:-	NDUFA12	included
isoform1=junction:chr1:30941273-30945345:-|isoform2=junction:chr1:30942124-30945345:-@exon:chr1:30941998-30942123:-@junction:chr1:30941273-30941997:-	PUM1	multimodal
isoform1=junction:chr13:113501881-113510237:+|isoform2=junction:chr13:113501881-113503495:+@exon:chr13:113503496-113503588:+@junction:chr13:113503589-113510237:+	TMCO3	multimodal
isoform1=junction:chr1:31910113-31915894:-|isoform2=junction:chr1:31911827-31915894:-@exon:chr1:31911696-31911826:-@junction:chr1:31910113-31911695:-	PTP4A2	included
isoform1=junction:chr1:31911827-31918969:-|isoform2=junction:chr1:31915988-31918969:-@exon:chr1:31915895-31915987:-@junction:chr1:31911827-31915894:-	PTP4A2	included
isoform1=junction:chr1:32030423-32033187:+|isoform2=junction:chr1:32030423-32031523:+@exon:chr1:32031524-32031640:+@junction:chr1:32031641-32033187:+	KHDRBS1	multimodal
isoform1=junction:chr1:32627545-32633644:-|isoform2=junction:chr1:32631880-32633644:-@exon:chr1:32631827-32631879:-@junction:chr1:32627545-32631826:-	ZBTB8OS	multimodal
isoform1=junction:chr13:27253844-27255241:+|isoform2=junction:chr13:27253844-27254219:+@exon:chr13:27254220-27254281:+@junction:chr13:27254282-27255241:+	RPL21	included
isoform1=junction:chr13:27435035-27435432:+|isoform2=junction:chr13:27435035-27435132:+@exon:chr13:27435133-27435192:+@junction:chr13:27435193-27435432:+	GTF3A	included
isoform1=junction:chr1:32810767-32817187:-|isoform2=junction:chr1:32811058-32817187:-@exon:chr1:32810911-32811057:-@junction:chr1:32810767-32810910:-	YARS	included
isoform1=junction:chr13:36952600-36971976:-|isoform2=junction:chr13:36965727-36971976:-@exon:chr13:36965575-36965726:-@junction:chr13:36952600-36965574:-	ALG5	included
isoform1=junction:chr13:38354297-38359300:+|isoform2=junction:chr13:38354297-38358092:+@exon:chr13:38358093-38358132:+@junction:chr13:38358133-38359300:+	UFM1	included
isoform1=junction:chr13:43069004-43085767:+|isoform2=junction:chr13:43069004-43078611:+@exon:chr13:43078612-43078688:+@junction:chr13:43078689-43085767:+	DNAJC15	included
isoform1=junction:chr13:45338777-45339993:-|isoform2=junction:chr13:45339603-45339993:-@exon:chr13:45339497-45339602:-@junction:chr13:45338777-45339496:-	TPT1	included
isoform1=junction:chr13:45340185-45341041:-|isoform2=junction:chr13:45340786-45341041:-@exon:chr13:45340712-45340785:-@junction:chr13:45340185-45340711:-	TPT1	included
isoform1=junction:chr13:46777624-46781495:-|isoform2=junction:chr13:46780034-46781495:-@exon:chr13:46779935-46780033:-@junction:chr13:46777624-46779934:-	ESD	included
isoform1=junction:chr1:35631345-35641341:-|isoform2=junction:chr1:35636433-35641341:-@exon:chr1:35636310-35636432:-@junction:chr1:35631345-35636309:-	PSMB2	included
isoform1=junction:chr13:75569508-75594914:+|isoform2=junction:chr13:75569508-75589937:+@exon:chr13:75589938-75590129:+@junction:chr13:75590130-75594914:+	AL137782.1	bimodal
isoform1=junction:chr13:75636727-75727028:+|isoform2=junction:chr13:75636727-75713181:+@exon:chr13:75713182-75713252:+@junction:chr13:75713253-75727028:+	LMO7	multimodal
isoform1=junction:chr1:40074184-40078559:-|isoform2=junction:chr1:40076914-40078559:-@exon:chr1:40076842-40076913:-@junction:chr1:40074184-40076841:-	PPT1	included
isoform1=junction:chr14:103729183-103732619:+|isoform2=junction:chr14:103729183-103729792:+@exon:chr14:103729793-103729846:+@junction:chr14:103729847-103732619:+	ZFYVE21	bimodal
isoform1=junction:chr14:103913985-103921469:-|isoform2=junction:chr14:103915190-103921469:-@exon:chr14:103915066-103915189:-@junction:chr14:103913985-103915065:-	C14orf2	included
isoform1=junction:chr14:104753320-104756603:+|isoform2=junction:chr14:104753320-104755629:+@exon:chr14:104755630-104755824:+@junction:chr14:104755825-104756603:+	SIVA1	included
isoform1=junction:chr14:21234230-21269297:-|isoform2=junction:chr14:21263337-21269297:-@exon:chr14:21263311-21263336:-@junction:chr14:21234230-21263310:-	HNRNPC	included
isoform1=junction:chr14:21263337-21269297:-|isoform2=junction:chr14:21263830-21269297:-@exon:chr14:21263667-21263829:-@junction:chr14:21263337-21263666:-	HNRNPC	excluded
isoform1=junction:chr14:23026376-23033367:-|isoform2=junction:chr14:23027830-23033367:-@exon:chr14:23027745-23027829:-@junction:chr14:23026376-23027744:-	PSMB5	excluded
isoform1=junction:chr1:43365009-43365563:-|isoform2=junction:chr1:43365377-43365563:-@exon:chr1:43365186-43365376:-@junction:chr1:43365009-43365185:-	ELOVL1	included
isoform1=junction:chr14:34603472-34605595:-|isoform2=junction:chr14:34604269-34605595:-@exon:chr14:34604135-34604268:-@junction:chr14:34603472-34604134:-	SNX6	excluded
isoform1=junction:chr14:34605718-34609637:-|isoform2=junction:chr14:34608141-34609637:-@exon:chr14:34608030-34608140:-@junction:chr14:34605718-34608029:-	SNX6	included
isoform1=junction:chr14:35402664-35403149:-|isoform2=junction:chr14:35402860-35403149:-@exon:chr14:35402771-35402859:-@junction:chr14:35402664-35402770:-	NFKBIA	included
isoform1=junction:chr1:43975108-43976089:+|isoform2=junction:chr1:43975108-43975799:+@exon:chr1:43975800-43975848:+@junction:chr1:43975849-43976089:+	ATP6V0B	included
isoform1=junction:chr1:43976380-43976772:+|isoform2=junction:chr1:43976380-43976589:+@exon:chr1:43976590-43976659:+@junction:chr1:43976660-43976772:+	ATP6V0B	included
isoform1=junction:chr14:52718143-52718976:+|isoform2=junction:chr14:52718143-52718228:+@exon:chr14:52718229-52718352:+@junction:chr14:52718353-52718976:+	PSMC6	included
isoform1=junction:chr14:52721191-52723964:+|isoform2=junction:chr14:52721191-52723804:+@novel_exon:chr14:52723805-52723874:+@junction:chr14:52723875-52723964:+	PSMC6	excluded
isoform1=junction:chr14:54397078-54401523:+|isoform2=junction:chr14:54397078-54399893:+@exon:chr14:54399894-54399976:+@junction:chr14:54399977-54401523:+	CDKN3	multimodal
isoform1=junction:chr14:55051804-55062617:+|isoform2=junction:chr14:55051804-55061679:+@exon:chr14:55061680-55061701:+@junction:chr14:55061702-55062617:+	MAPK1IP1L	multimodal
isoform1=junction:chr1:45511415-45514872:-|isoform2=junction:chr1:45514638-45514872:-@exon:chr1:45514507-45514637:-@junction:chr1:45511415-45514506:-	PRDX1	included
isoform1=junction:chr1:45551156-45566568:+|isoform2=junction:chr1:45551156-45561788:+@exon:chr1:45561789-45561878:+@junction:chr1:45561879-45566568:+	AKR1A1	included
isoform1=junction:chr1:45568178-45568926:+|isoform2=junction:chr1:45568178-45568484:+@exon:chr1:45568485-45568684:+@junction:chr1:45568685-45568926:+	AKR1A1	included
isoform1=junction:chr1:45606592-45613168:+|isoform2=junction:chr1:45606592-45607320:+@exon:chr1:45607321-45608337:+@junction:chr1:45608338-45613168:+	NASP	excluded
isoform1=junction:chr14:58215285-58223621:+|isoform2=junction:chr14:58215285-58219693:+@exon:chr14:58219694-58219729:+@junction:chr14:58219730-58223621:+	ACTR10	included
isoform1=junction:chr14:58247833-58257744:+|isoform2=junction:chr14:58247833-58252118:+@exon:chr14:58252119-58252242:+@junction:chr14:58252243-58257744:+	PSMA3	included
isoform1=junction:chr14:59498909-59503853:+|isoform2=junction:chr14:59498909-59501190:+@exon:chr14:59501191-59501267:+@junction:chr14:59501268-59503853:+	JKAMP	included
isoform1=junction:chr1:46309128-46310154:+|isoform2=junction:chr1:46309128-46309896:+@exon:chr1:46309897-46310044:+@junction:chr1:46310045-46310154:+	UQCRH	bimodal
isoform1=junction:chr14:64924127-64932137:+|isoform2=junction:chr14:64924127-64926006:+@exon:chr14:64926007-64926080:+@junction:chr14:64926081-64932137:+	CHURC1	multimodal
isoform1=junction:chr14:64924127-64932137:+|isoform2=junction:chr14:64924127-64926009:+@exon:chr14:64926010-64926080:+@junction:chr14:64926081-64932137:+	CHURC1	bimodal
isoform1=junction:chr14:69768675-69769181:+|isoform2=junction:chr14:69768675-69768797:+@exon:chr14:69768798-69768896:+@junction:chr14:69768897-69769181:+	SRSF5	included
isoform1=junction:chr1:47185098-47189865:-|isoform2=junction:chr1:47187428-47189865:-@exon:chr1:47187319-47187427:-@junction:chr1:47185098-47187318:-	PDZK1IP1	multimodal
isoform1=junction:chr14:73959225-73961172:+|isoform2=junction:chr14:73959225-73959414:+@exon:chr14:73959415-73959522:+@junction:chr14:73959523-73961172:+	COQ6	included
isoform1=junction:chr14:74480780-74486328:-|isoform2=junction:chr14:74484588-74486328:-@exon:chr14:74484415-74484587:-@junction:chr14:74480780-74484414:-	NPC2	included
isoform1=junction:chr14:93218736-93220248:+|isoform2=junction:chr14:93218736-93219211:+@exon:chr14:93219212-93219361:+@junction:chr14:93219362-93220248:+	UBR7	bimodal
isoform1=junction:chr14:94110798-94111624:+|isoform2=junction:chr14:94110798-94110925:+@exon:chr14:94110926-94110978:+@junction:chr14:94110979-94111624:+	IFI27	excluded
isoform1=junction:chr14:94110798-94111658:+|isoform2=junction:chr14:94110798-94110925:+@exon:chr14:94110926-94110978:+@junction:chr14:94110979-94111658:+	IFI27	excluded
isoform1=junction:chr14:94110798-94114850:+|isoform2=junction:chr14:94110798-94111624:+@exon:chr14:94111625-94111773:+@junction:chr14:94111774-94114850:+	IFI27	included
isoform1=junction:chr14:94110798-94114850:+|isoform2=junction:chr14:94110798-94111658:+@exon:chr14:94111659-94111773:+@junction:chr14:94111774-94114850:+	IFI27	included
isoform1=junction:chr14:94111774-94115780:+|isoform2=junction:chr14:94111774-94114850:+@exon:chr14:94114851-94114880:+@junction:chr14:94114881-94115780:+	IFI27	included
isoform1=junction:chr15:101285802-101286907:-|isoform2=junction:chr15:101286294-101286907:-@exon:chr15:101286214-101286293:-@junction:chr15:101285802-101286213:-	SNRPA1	multimodal
isoform1=junction:chr1:51652042-51714002:+|isoform2=junction:chr1:51652042-51669433:+@exon:chr1:51669434-51669512:+@junction:chr1:51669513-51714002:+	OSBPL9	multimodal
isoform1=junction:chr15:34225201-34227692:+|isoform2=junction:chr15:34225201-34225535:+@exon:chr15:34225536-34225650:+@junction:chr15:34225651-34227692:+	EMC4	included
isoform1=junction:chr15:34227847-34229752:+|isoform2=junction:chr15:34227847-34228428:+@exon:chr15:34228429-34228589:+@junction:chr15:34228590-34229752:+	EMC4	included
isoform1=junction:chr15:40853930-40854396:+|isoform2=junction:chr15:40853930-40854059:+@exon:chr15:40854060-40854086:+@junction:chr15:40854087-40854396:+	SPINT1	included
isoform1=junction:chr15:41231450-41256909:+|isoform2=junction:chr15:41231450-41243666:+@exon:chr15:41243667-41243739:+@junction:chr15:41243740-41256909:+	CHP1	included
isoform1=junction:chr15:41256991-41270556:+|isoform2=junction:chr15:41256991-41262755:+@exon:chr15:41262756-41262883:+@junction:chr15:41262884-41270556:+	CHP1	included
isoform1=junction:chr15:41262884-41270556:+|isoform2=junction:chr15:41262884-41264164:+@exon:chr15:41264165-41264235:+@junction:chr15:41264236-41270556:+	CHP1	excluded
isoform1=junction:chr15:42231261-42233212:-@exon:chr15:42231192-42231260:-@junction:chr15:42228821-42231191:-|isoform2=junction:chr15:42231916-42233212:-@exon:chr15:42231844-42231915:-@junction:chr15:42228821-42231843:-	TMEM87A	multimodal
isoform1=junction:chr15:42268033-42273254:-|isoform2=junction:chr15:42272124-42273254:-@exon:chr15:42272063-42272123:-@junction:chr15:42268033-42272062:-	TMEM87A	included
isoform1=junction:chr15:43746707-43756648:+|isoform2=junction:chr15:43746707-43753823:+@exon:chr15:43753824-43753902:+@junction:chr15:43753903-43756648:+	PDIA3	included
isoform1=junction:chr15:43761532-43765449:+|isoform2=junction:chr15:43761532-43763076:+@exon:chr15:43763077-43763206:+@junction:chr15:43763207-43765449:+	PDIA3	included
isoform1=junction:chr15:50301369-50303965:-|isoform2=junction:chr15:50303124-50303965:-@exon:chr15:50302929-50303123:-@junction:chr15:50301369-50302928:-	GABPB1	included
isoform1=junction:chr15:50707875-50722123:-|isoform2=junction:chr15:50720101-50722123:-@exon:chr15:50719940-50720100:-@junction:chr15:50707875-50719939:-	SPPL2A	included
isoform1=junction:chr15:59678088-59679591:-|isoform2=junction:chr15:59678835-59679591:-@exon:chr15:59678748-59678834:-@junction:chr15:59678088-59678747:-	BNIP2	excluded
isoform1=junction:chr15:60347690-60351192:-|isoform2=junction:chr15:60349198-60351192:-@exon:chr15:60349075-60349197:-@junction:chr15:60347690-60349074:-	ANXA2	included
isoform1=junction:chr15:60364524-60386027:-|isoform2=junction:chr15:60382442-60386027:-@exon:chr15:60382342-60382441:-@junction:chr15:60364524-60382341:-	ANXA2	included
isoform1=junction:chr15:60386087-60397257:-|isoform2=junction:chr15:60396428-60397257:-@exon:chr15:60396373-60396427:-@junction:chr15:60386087-60396372:-	ANXA2	excluded
isoform1=junction:chr15:60386087-60397942:-|isoform2=junction:chr15:60396428-60397942:-@exon:chr15:60396373-60396427:-@junction:chr15:60386087-60396372:-	ANXA2	excluded
isoform1=junction:chr15:60386087-60397942:-|isoform2=junction:chr15:60397339-60397942:-@exon:chr15:60397258-60397338:-@junction:chr15:60386087-60397257:-	ANXA2	excluded
isoform1=junction:chr15:63061274-63062214:+|isoform2=junction:chr15:63061274-63061712:+@exon:chr15:63061713-63061788:+@junction:chr15:63061789-63062214:+	TPM1	excluded
isoform1=junction:chr15:63504831-63532646:+|isoform2=junction:chr15:63504831-63529013:+@exon:chr15:63529014-63529166:+@junction:chr15:63529167-63532646:+	USP3	bimodal
isoform1=junction:chr15:64075538-64088686:-|isoform2=junction:chr15:64081152-64088686:-@exon:chr15:64081102-64081151:-@junction:chr15:64075538-64081101:-	FAM96A	multimodal
isoform1=junction:chr15:64366076-64380957:-|isoform2=junction:chr15:64376906-64380957:-@exon:chr15:64376743-64376905:-@junction:chr15:64366076-64376742:-	AC087632.1	included
isoform1=junction:chr15:65554961-65558679:+|isoform2=junction:chr15:65554961-65556738:+@exon:chr15:65556739-65556903:+@junction:chr15:65556904-65558679:+	HACD3	included
isoform1=junction:chr15:69453021-69455169:+|isoform2=junction:chr15:69453021-69453646:+@exon:chr15:69453647-69453721:+@junction:chr15:69453722-69455169:+	RPLP1	included
isoform1=junction:chr15:72202621-72206727:-@exon:chr15:72202454-72202620:-@junction:chr15:72200656-72202453:-|isoform2=junction:chr15:72203189-72206727:-@exon:chr15:72203022-72203188:-@junction:chr15:72200656-72203021:-	PKM	excluded
isoform1=junction:chr15:72353179-72355558:-|isoform2=junction:chr15:72353738-72355558:-@exon:chr15:72353691-72353737:-@junction:chr15:72353179-72353690:-	HEXA	included
isoform1=junction:chr15:74920443-74926765:-|isoform2=junction:chr15:74923771-74926765:-@exon:chr15:74923648-74923770:-@junction:chr15:74920443-74923647:-	COX5A	included
isoform1=junction:chr15:74923771-74929115:-|isoform2=junction:chr15:74926888-74929115:-@exon:chr15:74926766-74926887:-@junction:chr15:74923771-74926765:-	COX5A	included
isoform1=junction:chr15:74926888-74937914:-|isoform2=junction:chr15:74929233-74937914:-@exon:chr15:74929116-74929232:-@junction:chr15:74926888-74929115:-	COX5A	included
isoform1=junction:chr15:75338134-75338645:+|isoform2=junction:chr15:75338134-75338354:+@exon:chr15:75338355-75338420:+@junction:chr15:75338421-75338645:+	COMMD4	included
isoform1=junction:chr15:75339345-75339964:+|isoform2=junction:chr15:75339345-75339701:+@exon:chr15:75339702-75339878:+@junction:chr15:75339879-75339964:+	COMMD4	included
isoform1=junction:chr15:76292514-76295590:-|isoform2=junction:chr15:76292701-76295590:-@exon:chr15:76292619-76292700:-@junction:chr15:76292514-76292618:-	ETFA	included
isoform1=junction:chr15:76292701-76311349:-|isoform2=junction:chr15:76295738-76311349:-@exon:chr15:76295591-76295737:-@junction:chr15:76292701-76295590:-	ETFA	multimodal
isoform1=junction:chr15:78289713-78292615:-|isoform2=junction:chr15:78290100-78292615:-@exon:chr15:78289951-78290099:-@junction:chr15:78289713-78289950:-	WDR61	included
isoform1=junction:chr15:78542220-78544189:+|isoform2=junction:chr15:78542220-78542482:+@exon:chr15:78542483-78542645:+@junction:chr15:78542646-78544189:+	PSMA4	included
isoform1=junction:chr15:84670783-84687624:-|isoform2=junction:chr15:84680833-84687624:-@exon:chr15:84680713-84680832:-@junction:chr15:84670783-84680712:-	SEC11A	included
isoform1=junction:chr15:90981034-90981747:-|isoform2=junction:chr15:90981670-90981747:-@exon:chr15:90981499-90981669:-@junction:chr15:90981034-90981498:-	PRC1	included
isoform1=junction:chr16:14998406-15004186:+|isoform2=junction:chr16:14998406-15001775:+@exon:chr16:15001776-15001856:+@junction:chr16:15001857-15004186:+	PDXDC1	included
isoform1=junction:chr16:21161279-21170436:+|isoform2=junction:chr16:21161279-21166839:+@exon:chr16:21166840-21166911:+@junction:chr16:21166912-21170436:+	TMEM159	excluded
isoform1=junction:chr16:21170606-21179474:+|isoform2=junction:chr16:21170606-21174009:+@exon:chr16:21174010-21174148:+@junction:chr16:21174149-21179474:+	TMEM159	included
isoform1=junction:chr16:2772103-2776992:-|isoform2=junction:chr16:2775557-2776992:-@exon:chr16:2775451-2775556:-@junction:chr16:2772103-2775450:-	ELOB	included
isoform1=junction:chr16:30065928-30067233:+|isoform2=junction:chr16:30065928-30066884:+@exon:chr16:30066885-30067038:+@junction:chr16:30067039-30067233:+	ALDOA	excluded
isoform1=junction:chr16:30082535-30083393:+|isoform2=junction:chr16:30082535-30082745:+@exon:chr16:30082746-30082847:+@junction:chr16:30082848-30083393:+	PPP4C	included
isoform1=junction:chr16:3020492-3021554:+|isoform2=junction:chr16:3020492-3021214:+@exon:chr16:3021215-3021319:+@junction:chr16:3021320-3021554:+	TNFRSF12A	included
isoform1=junction:chr16:31091343-31094556:-|isoform2=junction:chr16:31093422-31094556:-@exon:chr16:31093312-31093421:-@junction:chr16:31091343-31093311:-	AC135050.2	included
isoform1=junction:chr16:31185180-31188324:+|isoform2=junction:chr16:31185180-31186801:+@exon:chr16:31186802-31186836:+@junction:chr16:31186837-31188324:+	FUS	bimodal
isoform1=junction:chr16:31201842-31202416:-|isoform2=junction:chr16:31202204-31202416:-@exon:chr16:31202147-31202203:-@junction:chr16:31201842-31202146:-	PYCARD	multimodal
isoform1=junction:chr16:56625880-56626879:+|isoform2=junction:chr16:56625880-56626465:+@exon:chr16:56626466-56626531:+@junction:chr16:56626532-56626879:+	MT1E	multimodal
isoform1=junction:chr16:56935313-56936686:+|isoform2=junction:chr16:56935313-56935400:+@exon:chr16:56935401-56935475:+@junction:chr16:56935476-56936686:+	HERPUD1	included
isoform1=junction:chr16:634798-635280:-|isoform2=junction:chr16:634957-635280:-@exon:chr16:634889-634956:-@junction:chr16:634798-634888:-	METTL26	multimodal
isoform1=junction:chr16:66558349-66565885:+|isoform2=junction:chr16:66558349-66563121:+@exon:chr16:66563122-66563217:+@junction:chr16:66563218-66565885:+	CKLF	multimodal
isoform1=junction:chr16:67444707-67453543:-|isoform2=junction:chr16:67452361-67453543:-@exon:chr16:67452238-67452360:-@junction:chr16:67444707-67452237:-	ATP6V0D1	excluded
isoform1=junction:chr16:68815760-68822000:+|isoform2=junction:chr16:68815760-68819279:+@exon:chr16:68819280-68819425:+@junction:chr16:68819426-68822000:+	CDH1	multimodal
isoform1=junction:chr16:69340333-69341532:+|isoform2=junction:chr16:69340333-69341179:+@exon:chr16:69341180-69341320:+@junction:chr16:69341321-69341532:+	NIP7	included
isoform1=junction:chr16:69711282-69714963:-|isoform2=junction:chr16:69713130-69714963:-@exon:chr16:69713028-69713129:-@junction:chr16:69711282-69713027:-	NQO1	included
isoform1=junction:chr16:69713130-69718122:-|isoform2=junction:chr16:69715078-69718122:-@exon:chr16:69714964-69715077:-@junction:chr16:69713130-69714963:-	NQO1	included
isoform1=junction:chr16:89646715-89647202:-|isoform2=junction:chr16:89647072-89647202:-@novel_exon:chr16:89647035-89647071:-@junction:chr16:89646715-89647034:-	CHMP1A	excluded
isoform1=junction:chr16:89873860-89883350:+|isoform2=junction:chr16:89873860-89878460:+@exon:chr16:89878461-89878627:+@junction:chr16:89878628-89883350:+	TCF25	excluded
isoform1=junction:chr1:70228556-70232267:+|isoform2=junction:chr1:70228556-70231858:+@exon:chr1:70231859-70231975:+@junction:chr1:70231976-70232267:+	SRSF11	excluded
isoform1=junction:chr17:16439415-16440184:+|isoform2=junction:chr17:16439415-16439527:+@exon:chr17:16439528-16439703:+@junction:chr17:16439704-16440184:+	LRRC75A-AS1	multimodal
isoform1=junction:chr17:16439415-16440184:+|isoform2=junction:chr17:16439415-16439580:+@exon:chr17:16439581-16439703:+@junction:chr17:16439704-16440184:+	LRRC75A-AS1	multimodal
isoform1=junction:chr17:17882864-17893660:-|isoform2=junction:chr17:17884769-17893660:-@exon:chr17:17884634-17884768:-@junction:chr17:17882864-17884633:-	TOM1L2	included
isoform1=junction:chr17:21302260-21304425:+|isoform2=junction:chr17:21302260-21303182:+@exon:chr17:21303183-21303234:+@junction:chr17:21303235-21304425:+	MAP2K3	included
isoform1=junction:chr17:27294436-27303366:+|isoform2=junction:chr17:27294436-27301787:+@exon:chr17:27301788-27301956:+@junction:chr17:27301957-27303366:+	WSB1	bimodal
isoform1=junction:chr17:27309273-27311508:+|isoform2=junction:chr17:27309273-27310060:+@exon:chr17:27310061-27310174:+@junction:chr17:27310175-27311508:+	WSB1	included
isoform1=junction:chr17:32360968-32362913:+|isoform2=junction:chr17:32360968-32361467:+@exon:chr17:32361468-32361515:+@junction:chr17:32361516-32362913:+	ZNF207	included
isoform1=junction:chr17:32365488-32367771:+|isoform2=junction:chr17:32365488-32366664:+@exon:chr17:32366665-32366757:+@junction:chr17:32366758-32367771:+	ZNF207	multimodal
isoform1=junction:chr17:36486786-36492812:+|isoform2=junction:chr17:36486786-36486934:+@exon:chr17:36486935-36486966:+@junction:chr17:36486967-36492812:+	ZNHIT3	multimodal
isoform1=junction:chr17:38755991-38762410:+|isoform2=junction:chr17:38755991-38760430:+@exon:chr17:38760431-38760608:+@junction:chr17:38760609-38762410:+	PSMB3	included
isoform1=junction:chr17:39744208-39744885:+|isoform2=junction:chr17:39744208-39744552:+@exon:chr17:39744553-39744663:+@junction:chr17:39744664-39744885:+	GRB7	included
isoform1=junction:chr17:40928608-40931372:-|isoform2=junction:chr17:40930097-40931372:-@exon:chr17:40929940-40930096:-@junction:chr17:40928608-40929939:-	KRT23	included
isoform1=junction:chr17:41524541-41525190:-|isoform2=junction:chr17:41525000-41525190:-@exon:chr17:41524843-41524999:-@junction:chr17:41524541-41524842:-	KRT19	included
isoform1=junction:chr17:49705897-49706964:-|isoform2=junction:chr17:49706335-49706964:-@exon:chr17:49706204-49706334:-@junction:chr17:49705897-49706203:-	SLC35B1	included
isoform1=junction:chr17:51168344-51171486:+|isoform2=junction:chr17:51168344-51169936:+@exon:chr17:51169937-51170049:+@junction:chr17:51170050-51171486:+	NME1-NME2	included
isoform1=junction:chr17:5422830-5432541:+|isoform2=junction:chr17:5422830-5425970:+@exon:chr17:5425971-5428211:+@junction:chr17:5428212-5432541:+	RPAIN	bimodal
isoform1=junction:chr17:5426300-5432541:+|isoform2=junction:chr17:5426300-5428070:+@exon:chr17:5428071-5428211:+@junction:chr17:5428212-5432541:+	RPAIN	bimodal
isoform1=junction:chr1:75732923-75734790:+|isoform2=junction:chr1:75732923-75733527:+@exon:chr1:75733528-75733628:+@junction:chr1:75733629-75734790:+	ACADM	multimodal
isoform1=junction:chr17:58347242-58351401:-|isoform2=junction:chr17:58347585-58351401:-@exon:chr17:58347529-58347584:-@junction:chr17:58347242-58347528:-	SUPT4H1	bimodal
isoform1=junction:chr17:60083767-60088196:-|isoform2=junction:chr17:60085204-60088196:-@exon:chr17:60085055-60085203:-@junction:chr17:60083767-60085054:-	WFDC21P	included
isoform1=junction:chr17:60083767-60088196:-|isoform2=junction:chr17:60085204-60088196:-@exon:chr17:60085103-60085203:-@junction:chr17:60083767-60085102:-	WFDC21P	included
isoform1=junction:chr17:60083767-60088196:-|isoform2=junction:chr17:60085204-60088196:-@exon:chr17:60085113-60085203:-@junction:chr17:60083767-60085112:-	WFDC21P	included
isoform1=junction:chr17:64500327-64502009:-|isoform2=junction:chr17:64500774-64502009:-@exon:chr17:64500549-64500773:-@junction:chr17:64500327-64500548:-	DDX5	included
isoform1=junction:chr17:68433576-68435619:-|isoform2=junction:chr17:68434627-68435619:-@exon:chr17:68434556-68434626:-@junction:chr17:68433576-68434555:-	WIPI1	multimodal
isoform1=junction:chr17:7012762-7013665:+|isoform2=junction:chr17:7012762-7013318:+@exon:chr17:7013319-7013516:+@junction:chr17:7013517-7013665:+	RNASEK	excluded
isoform1=junction:chr17:7224070-7224320:+|isoform2=junction:chr17:7224070-7224145:+@exon:chr17:7224146-7224243:+@junction:chr17:7224244-7224320:+	ACADVL	included
isoform1=junction:chr17:75039272-75042180:-|isoform2=junction:chr17:75040164-75042180:-@exon:chr17:75040092-75040163:-@junction:chr17:75039272-75040091:-	ATP5H	included
isoform1=junction:chr17:75321828-75332699:-|isoform2=junction:chr17:75326021-75332699:-@exon:chr17:75325898-75326020:-@junction:chr17:75321828-75325897:-	GRB2	included
isoform1=junction:chr17:76735159-76736153:-|isoform2=junction:chr17:76735876-76736153:-@exon:chr17:76735772-76735875:-@junction:chr17:76735159-76735771:-	SRSF2	excluded
isoform1=junction:chr17:78119393-78121012:-|isoform2=junction:chr17:78120833-78121012:-@exon:chr17:78120653-78120832:-@junction:chr17:78119393-78120652:-	TMC6	multimodal
isoform1=junction:chr17:78171055-78171738:+|isoform2=junction:chr17:78171055-78171509:+@exon:chr17:78171510-78171649:+@junction:chr17:78171650-78171738:+	SYNGR2	included
isoform1=junction:chr17:80101626-80104554:+|isoform2=junction:chr17:80101626-80101810:+@exon:chr17:80101811-80101890:+@junction:chr17:80101891-80104554:+	GAA	included
isoform1=junction:chr17:80139163-80140007:-|isoform2=junction:chr17:80139751-80140007:-@exon:chr17:80139670-80139750:-@junction:chr17:80139163-80139669:-	EIF4A3	included
isoform1=junction:chr17:81933377-81934652:-|isoform2=junction:chr17:81934490-81934652:-@exon:chr17:81934326-81934489:-@junction:chr17:81933377-81934325:-	PYCR1	bimodal
isoform1=junction:chr17:82019382-82019857:-|isoform2=junction:chr17:82019695-82019857:-@exon:chr17:82019641-82019694:-@junction:chr17:82019382-82019640:-	CENPX	multimodal
isoform1=junction:chr17:82472699-82478799:+|isoform2=junction:chr17:82472699-82478570:+@exon:chr17:82478571-82478667:+@junction:chr17:82478668-82478799:+	NARF	bimodal
isoform1=junction:chr18:166820-180235:+|isoform2=junction:chr18:166820-178932:+@exon:chr18:178933-179037:+@junction:chr18:179038-180235:+	USP14	included
isoform1=junction:chr18:23504448-23507984:+|isoform2=junction:chr18:23504448-23506969:+@exon:chr18:23506970-23507054:+@junction:chr18:23507055-23507984:+	C18orf8	included
isoform1=junction:chr18:26057743-26078075:-|isoform2=junction:chr18:26068558-26078075:-@exon:chr18:26068494-26068557:-@junction:chr18:26057743-26068493:-	SS18	excluded
isoform1=junction:chr18:36138873-36141136:+|isoform2=junction:chr18:36138873-36139418:+@exon:chr18:36139419-36139613:+@junction:chr18:36139614-36141136:+	ELP2	excluded
isoform1=junction:chr1:84498549-84506010:-|isoform2=junction:chr1:84501971-84506010:-@exon:chr1:84501826-84501970:-@junction:chr1:84498549-84501825:-	GNG5	included
isoform1=junction:chr18:49490928-49491531:-|isoform2=junction:chr18:49491446-49491531:-@exon:chr18:49491405-49491445:-@junction:chr18:49490928-49491404:-	RPL17	included
isoform1=junction:chr1:86863606-86880661:-|isoform2=junction:chr1:86868103-86880661:-@exon:chr1:86868053-86868102:-@junction:chr1:86863606-86868052:-	SELENOF	included
isoform1=junction:chr18:9937067-9950394:+|isoform2=junction:chr18:9937067-9944923:+@exon:chr18:9944924-9945058:+@junction:chr18:9945059-9950394:+	VAPA	excluded
isoform1=junction:chr19:10679928-10681018:+|isoform2=junction:chr19:10679928-10680345:+@exon:chr19:10680346-10680443:+@junction:chr19:10680444-10681018:+	ILF3	multimodal
isoform1=junction:chr19:11102787-11106564:+|isoform2=junction:chr19:11102787-11105219:+@exon:chr19:11105220-11105600:+@junction:chr19:11105601-11106564:+	LDLR	multimodal
isoform1=junction:chr19:11116213-11120091:+|isoform2=junction:chr19:11116213-11116858:+@exon:chr19:11116859-11116998:+@junction:chr19:11116999-11120091:+	LDLR	included
isoform1=junction:chr19:12676143-12677290:-|isoform2=junction:chr19:12677212-12677290:-@exon:chr19:12677108-12677211:-@junction:chr19:12676143-12677107:-	DHPS	included
isoform1=junction:chr19:1438893-1440018:+|isoform2=junction:chr19:1438893-1439715:+@exon:chr19:1439716-1439826:+@junction:chr19:1439827-1440018:+	RPS15	excluded
isoform1=junction:chr19:14410335-14410988:-|isoform2=junction:chr19:14410606-14410988:-@exon:chr19:14410421-14410605:-@junction:chr19:14410335-14410420:-	DDX39A	bimodal
isoform1=junction:chr19:14410335-14410988:-|isoform2=junction:chr19:14410606-14410988:-@exon:chr19:14410548-14410605:-@junction:chr19:14410335-14410547:-	DDX39A	excluded
isoform1=junction:chr19:16647262-16659394:-|isoform2=junction:chr19:16654126-16659394:-@exon:chr19:16654035-16654125:-@junction:chr19:16647262-16654034:-	AC008764.4	included
isoform1=junction:chr19:18900450-18904770:-|isoform2=junction:chr19:18903424-18904770:-@exon:chr19:18903268-18903423:-@junction:chr19:18900450-18903267:-	COPE	included
isoform1=junction:chr19:19795661-19806941:-|isoform2=junction:chr19:19806127-19806941:-@exon:chr19:19806031-19806126:-@junction:chr19:19795661-19806030:-	ZNF506	bimodal
isoform1=junction:chr19:2234062-2235761:-|isoform2=junction:chr19:2234241-2235761:-@exon:chr19:2234150-2234240:-@junction:chr19:2234062-2234149:-	PLEKHJ1	included
isoform1=junction:chr19:2269745-2271781:+|isoform2=junction:chr19:2269745-2271384:+@exon:chr19:2271385-2271530:+@junction:chr19:2271531-2271781:+	OAZ1	included
isoform1=junction:chr19:35116360-35119362:+|isoform2=junction:chr19:35116360-35117256:+@exon:chr19:35117257-35117378:+@junction:chr19:35117379-35119362:+	FXYD3	excluded
isoform1=junction:chr19:35116360-35119362:+|isoform2=junction:chr19:35116360-35119167:+@exon:chr19:35119168-35119251:+@junction:chr19:35119252-35119362:+	FXYD3	excluded
isoform1=junction:chr19:35122840-35123270:+|isoform2=junction:chr19:35122840-35122917:+@exon:chr19:35122918-35122954:+@junction:chr19:35122955-35123270:+	FXYD3	included
isoform1=junction:chr19:35158401-35164155:+|isoform2=junction:chr19:35158401-35160708:+@exon:chr19:35160709-35160801:+@junction:chr19:35160802-35164155:+	FXYD5	included
isoform1=junction:chr19:35546809-35547118:+|isoform2=junction:chr19:35546809-35546944:+@exon:chr19:35546945-35547029:+@junction:chr19:35547030-35547118:+	TMEM147	included
isoform1=junction:chr19:38264999-38287875:+|isoform2=junction:chr19:38264999-38283626:+@exon:chr19:38283627-38283797:+@junction:chr19:38283798-38287875:+	SPINT2	included
isoform1=junction:chr19:38283798-38289137:+|isoform2=junction:chr19:38283798-38287875:+@exon:chr19:38287876-38287935:+@junction:chr19:38287936-38289137:+	SPINT2	included
isoform1=junction:chr19:38632497-38634992:+|isoform2=junction:chr19:38632497-38632600:+@exon:chr19:38632601-38632678:+@junction:chr19:38632679-38634992:+	EIF3K	included
isoform1=junction:chr1:93873215-93876267:-|isoform2=junction:chr1:93875784-93876267:-@exon:chr1:93875645-93875783:-@junction:chr1:93873215-93875644:-	DNTTIP2	bimodal
isoform1=junction:chr19:39433419-39433664:-|isoform2=junction:chr19:39433570-39433664:-@exon:chr19:39433522-39433569:-@junction:chr19:39433419-39433521:-	RPS16	included
isoform1=junction:chr19:43511567-43526514:-|isoform2=junction:chr19:43526350-43526514:-@exon:chr19:43526201-43526349:-@junction:chr19:43511567-43526200:-	ETHE1	bimodal
isoform1=junction:chr19:43649144-43655438:-|isoform2=junction:chr19:43652372-43655438:-@exon:chr19:43652225-43652371:-@junction:chr19:43649144-43652224:-	PLAUR	multimodal
isoform1=junction:chr19:43652372-43656478:-|isoform2=junction:chr19:43655574-43656478:-@exon:chr19:43655439-43655573:-@junction:chr19:43652372-43655438:-	PLAUR	included
isoform1=junction:chr19:48474950-48478068:+|isoform2=junction:chr19:48474950-48477716:+@exon:chr19:48477717-48477719:+@junction:chr19:48477720-48478068:+	CYTH2	multimodal
isoform1=junction:chr19:54201610-54207397:+|isoform2=junction:chr19:54201610-54206275:+@exon:chr19:54206276-54206462:+@junction:chr19:54206463-54207397:+	RPS9	included
isoform1=junction:chr19:54206463-54207397:+|isoform2=junction:chr19:54206463-54206552:+@exon:chr19:54206553-54206724:+@junction:chr19:54206725-54207397:+	RPS9	excluded
isoform1=junction:chr19:8474245-8485602:+|isoform2=junction:chr19:8474245-8483157:+@exon:chr19:8483158-8483211:+@junction:chr19:8483212-8485602:+	HNRNPM	included
isoform1=junction:chr1:999614-999865:-|isoform2=junction:chr1:999788-999865:-@exon:chr1:999692-999787:-@junction:chr1:999614-999691:-	HES4	multimodal
isoform1=junction:chr20:1372241-1392833:-|isoform2=junction:chr20:1375604-1392833:-@exon:chr20:1375491-1375603:-@junction:chr20:1372241-1375490:-	FKBP1A	included
isoform1=junction:chr20:17570212-17600737:+|isoform2=junction:chr20:17570212-17591931:+@exon:chr20:17591932-17592063:+@junction:chr20:17592064-17600737:+	DSTN	excluded
isoform1=junction:chr20:20026920-20033101:+|isoform2=junction:chr20:20026920-20032507:+@exon:chr20:20032508-20032653:+@junction:chr20:20032654-20033101:+	NAA20	included
isoform1=junction:chr20:31550122-31559610:+|isoform2=junction:chr20:31550122-31554745:+@exon:chr20:31554746-31554829:+@junction:chr20:31554830-31559610:+	HM13	included
isoform1=junction:chr20:31561737-31569119:+|isoform2=junction:chr20:31561737-31566209:+@exon:chr20:31566210-31566295:+@junction:chr20:31566296-31569119:+	HM13	included
isoform1=junction:chr20:34073636-34075873:+|isoform2=junction:chr20:34073636-34073818:+@exon:chr20:34073819-34073866:+@junction:chr20:34073867-34075873:+	RALY	included
isoform1=junction:chr20:35280119-35284175:-|isoform2=junction:chr20:35280830-35284175:-@exon:chr20:35280654-35280829:-@junction:chr20:35280119-35280653:-	EIF6	included
isoform1=junction:chr20:35280119-35284380:-|isoform2=junction:chr20:35284262-35284380:-@exon:chr20:35284176-35284261:-@junction:chr20:35280119-35284175:-	EIF6	included
isoform1=junction:chr20:35280119-35284725:-|isoform2=junction:chr20:35284493-35284725:-@exon:chr20:35284176-35284492:-@junction:chr20:35280119-35284175:-	EIF6	included
isoform1=junction:chr20:35739018-35740823:-|isoform2=junction:chr20:35740598-35740823:-@exon:chr20:35740525-35740597:-@junction:chr20:35739018-35740524:-	RBM39	multimodal
isoform1=junction:chr20:36607819-36609600:+@exon:chr20:36609601-36609730:+@junction:chr20:36609731-36612009:+|isoform2=junction:chr20:36607819-36607889:+@exon:chr20:36607890-36608000:+@junction:chr20:36608001-36612009:+	TGIF2-C20orf24	excluded
isoform1=junction:chr20:36607819-36609600:+|isoform2=junction:chr20:36607819-36607889:+@exon:chr20:36607890-36608000:+@junction:chr20:36608001-36609600:+	C20orf24	excluded
isoform1=junction:chr20:37230060-37234019:+|isoform2=junction:chr20:37230060-37232295:+@exon:chr20:37232296-37232391:+@junction:chr20:37232392-37234019:+	RPN2	included
isoform1=junction:chr20:38421099-38426418:-|isoform2=junction:chr20:38422242-38426418:-@exon:chr20:38422092-38422241:-@junction:chr20:38421099-38422091:-	SNHG17	multimodal
isoform1=junction:chr20:43458510-43459770:+|isoform2=junction:chr20:43458510-43459152:+@exon:chr20:43459153-43459420:+@junction:chr20:43459421-43459770:+	SRSF6	bimodal
isoform1=junction:chr20:44901834-44903992:+|isoform2=junction:chr20:44901834-44902897:+@exon:chr20:44902898-44903121:+@junction:chr20:44903122-44903992:+	YWHAB	excluded
isoform1=junction:chr20:44901834-44903992:+|isoform2=junction:chr20:44901834-44903035:+@exon:chr20:44903036-44903121:+@junction:chr20:44903122-44903992:+	YWHAB	excluded
isoform1=junction:chr20:45252420-45253574:-|isoform2=junction:chr20:45253152-45253574:-@exon:chr20:45253002-45253151:-@junction:chr20:45252420-45253001:-	SLPI	included
isoform1=junction:chr20:45416344-45419294:+|isoform2=junction:chr20:45416344-45416516:+@exon:chr20:45416517-45418979:+@junction:chr20:45418980-45419294:+	PIGT	included
isoform1=junction:chr20:45416695-45419294:+|isoform2=junction:chr20:45416695-45418851:+@exon:chr20:45418852-45418979:+@junction:chr20:45418980-45419294:+	PIGT	included
isoform1=junction:chr20:45814471-45815540:+@exon:chr20:45815541-45815745:+@junction:chr20:45815746-45815853:+|isoform2=junction:chr20:45814471-45815389:+@exon:chr20:45815390-45815540:+@junction:chr20:45815541-45815853:+	UBE2C	excluded
isoform1=junction:chr20:45814471-45815853:+|isoform2=junction:chr20:45814471-45815540:+@exon:chr20:45815541-45815745:+@junction:chr20:45815746-45815853:+	UBE2C	included
isoform1=junction:chr20:45892028-45892397:+|isoform2=junction:chr20:45892028-45892272:+@exon:chr20:45892273-45892323:+@junction:chr20:45892324-45892397:+	CTSA	included
isoform1=junction:chr20:49154072-49174194:-|isoform2=junction:chr20:49166286-49174194:-@exon:chr20:49165997-49166285:-@junction:chr20:49154072-49165996:-	STAU1	excluded
isoform1=junction:chr20:49279209-49289044:+|isoform2=junction:chr20:49279209-49280484:+@exon:chr20:49280485-49280570:+@junction:chr20:49280571-49289044:+	ZFAS1	included
isoform1=junction:chr20:49280571-49289044:+|isoform2=junction:chr20:49280571-49280902:+@exon:chr20:49280903-49280964:+@junction:chr20:49280965-49289044:+	ZFAS1	multimodal
isoform1=junction:chr20:50830381-50876485:+|isoform2=junction:chr20:50830381-50841765:+@exon:chr20:50841766-50841900:+@junction:chr20:50841901-50876485:+	BCAS4	included
isoform1=junction:chr20:58895685-58903530:+|isoform2=junction:chr20:58895685-58898940:+@exon:chr20:58898941-58898985:+@junction:chr20:58898986-58903530:+	GNAS	multimodal
isoform1=junction:chr20:59036761-59038465:-|isoform2=junction:chr20:59037281-59038465:-@exon:chr20:59037191-59037280:-@junction:chr20:59036761-59037190:-	PRELID3B	bimodal
isoform1=junction:chr20:62308179-62308654:+|isoform2=junction:chr20:62308179-62308367:+@exon:chr20:62308368-62308470:+@junction:chr20:62308471-62308654:+	ADRM1	included
isoform1=junction:chr20:63873817-63882718:+|isoform2=junction:chr20:63873817-63875815:+@exon:chr20:63875816-63875875:+@junction:chr20:63875876-63882718:+	TPD52L2	multimodal
isoform1=junction:chr21:25982478-26000014:-|isoform2=junction:chr21:25997417-26000014:-@exon:chr21:25997360-25997416:-@junction:chr21:25982478-25997359:-	APP	multimodal
isoform1=junction:chr21:25982478-26021839:-|isoform2=junction:chr21:26000183-26021839:-@exon:chr21:26000015-26000182:-@junction:chr21:25982478-26000014:-	APP	included
isoform1=junction:chr21:33907454-33912288:-|isoform2=junction:chr21:33909212-33912288:-@exon:chr21:33909082-33909211:-@junction:chr21:33907454-33909081:-	AP000311.1	included
isoform1=junction:chr21:34073746-34142407:+|isoform2=junction:chr21:34073746-34125340:+@exon:chr21:34125341-34125480:+@junction:chr21:34125481-34142407:+	MRPS6	included
isoform1=junction:chr21:41250902-41275370:+|isoform2=junction:chr21:41250902-41257157:+@exon:chr21:41257158-41257326:+@junction:chr21:41257327-41275370:+	BACE2	multimodal
isoform1=junction:chr21:44865448-44873501:-|isoform2=junction:chr21:44865651-44873501:-@exon:chr21:44865571-44865650:-@junction:chr21:44865448-44865570:-	PTTG1IP	excluded
isoform1=junction:chr2:150474985-150487267:-|isoform2=junction:chr2:150486782-150487267:-@exon:chr2:150486694-150486781:-@junction:chr2:150474985-150486693:-	RND3	included
isoform1=junction:chr2:152677476-152679351:-|isoform2=junction:chr2:152679110-152679351:-@exon:chr2:152679056-152679109:-@junction:chr2:152677476-152679055:-	PRPF40A	multimodal
isoform1=junction:chr2:159743254-159747804:+|isoform2=junction:chr2:159743254-159745769:+@exon:chr2:159745770-159745937:+@junction:chr2:159745938-159747804:+	MARCH7	included
isoform1=junction:chr2:160281365-160284774:-|isoform2=junction:chr2:160282305-160284774:-@exon:chr2:160282257-160282304:-@junction:chr2:160281365-160282256:-	RBMS1	multimodal
isoform1=junction:chr2:169819644-169821942:-|isoform2=junction:chr2:169821274-169821942:-@exon:chr2:169821092-169821273:-@junction:chr2:169819644-169821091:-	METTL5	included
isoform1=junction:chr2:200853994-200855003:-|isoform2=junction:chr2:200854696-200855003:-@exon:chr2:200854616-200854695:-@junction:chr2:200853994-200854615:-	CLK1	included
isoform1=junction:chr2:200859747-200861237:-|isoform2=junction:chr2:200860216-200861237:-@exon:chr2:200860125-200860215:-@junction:chr2:200859747-200860124:-	CLK1	multimodal
isoform1=junction:chr2:202292904-202297378:+|isoform2=junction:chr2:202292904-202295673:+@exon:chr2:202295674-202295837:+@junction:chr2:202295838-202297378:+	NOP58	included
isoform1=junction:chr2:218228851-218238663:+|isoform2=junction:chr2:218228851-218234351:+@exon:chr2:218234352-218234397:+@junction:chr2:218234398-218238663:+	ARPC2	included
isoform1=junction:chr2:231455625-231456630:-|isoform2=junction:chr2:231456137-231456630:-@exon:chr2:231456010-231456136:-@junction:chr2:231455625-231456009:-	NCL	included
isoform1=junction:chr22:31619837-31620995:-|isoform2=junction:chr22:31620714-31620995:-@exon:chr22:31620553-31620713:-@junction:chr22:31619837-31620552:-	PISD	multimodal
isoform1=junction:chr22:36467918-36480574:-|isoform2=junction:chr22:36476857-36480574:-@exon:chr22:36476733-36476856:-@junction:chr22:36467918-36476732:-	TXN2	included
isoform1=junction:chr2:237518649-237525600:+|isoform2=junction:chr2:237518649-237519909:+@exon:chr2:237519910-237520029:+@junction:chr2:237520030-237525600:+	MLPH	included
isoform1=junction:chr2:237527517-237540347:+|isoform2=junction:chr2:237527517-237534563:+@exon:chr2:237534564-237534647:+@junction:chr2:237534648-237540347:+	MLPH	excluded
isoform1=junction:chr2:237540534-237542566:+|isoform2=junction:chr2:237540534-237540801:+@exon:chr2:237540802-237540957:+@junction:chr2:237540958-237542566:+	MLPH	included
isoform1=junction:chr2:237692522-237748363:+|isoform2=junction:chr2:237692522-237708543:+@exon:chr2:237708544-237708630:+@junction:chr2:237708631-237748363:+	LRRFIP1	included
isoform1=junction:chr22:39313311-39314106:-|isoform2=junction:chr22:39313730-39314106:-@exon:chr22:39313634-39313729:-@junction:chr22:39313311-39313633:-	RPL3	included
isoform1=junction:chr22:40951477-40964046:+|isoform2=junction:chr22:40951477-40953554:+@exon:chr22:40953555-40953633:+@junction:chr22:40953634-40964046:+	RBX1	included
isoform1=junction:chr22:41939197-41945224:-|isoform2=junction:chr22:41943702-41945224:-@exon:chr22:41943610-41943701:-@junction:chr22:41939197-41943609:-	CENPM	included
isoform1=junction:chr22:42560266-42571120:+|isoform2=junction:chr22:42560266-42566303:+@exon:chr22:42566304-42566338:+@junction:chr22:42566339-42571120:+	SERHL2	multimodal
isoform1=junction:chr22:50527718-50529135:-|isoform2=junction:chr22:50528611-50529135:-@exon:chr22:50528512-50528610:-@junction:chr22:50527718-50528511:-	TYMP	included
isoform1=junction:chr2:26254475-26269952:+|isoform2=junction:chr2:26254475-26263379:+@exon:chr2:26263380-26263479:+@junction:chr2:26263480-26269952:+	HADHB	included
isoform1=junction:chr2:271940-272191:+@exon:chr2:272192-272305:+@junction:chr2:272306-275139:+|isoform2=junction:chr2:271940-272036:+@exon:chr2:272037-272150:+@junction:chr2:272151-275139:+	ACP1	multimodal
isoform1=junction:chr2:27201114-27201665:-|isoform2=junction:chr2:27201454-27201665:-@exon:chr2:27201350-27201453:-@junction:chr2:27201114-27201349:-	SLC5A6	included
isoform1=junction:chr2:27206094-27206876:-|isoform2=junction:chr2:27206535-27206876:-@exon:chr2:27206483-27206534:-@junction:chr2:27206094-27206482:-	SLC5A6	included
isoform1=junction:chr2:27442902-27443397:+|isoform2=junction:chr2:27442902-27443073:+@exon:chr2:27443074-27443280:+@junction:chr2:27443281-27443397:+	KRTCAP3	included
isoform1=junction:chr2:27772693-27779432:+|isoform2=junction:chr2:27772693-27774423:+@exon:chr2:27774424-27774530:+@junction:chr2:27774531-27779432:+	MRPL33	multimodal
isoform1=junction:chr2:38745188-38746693:-|isoform2=junction:chr2:38746180-38746693:-@exon:chr2:38746144-38746179:-@junction:chr2:38745188-38746143:-	SRSF7	included
isoform1=junction:chr2:38748654-38749528:-|isoform2=junction:chr2:38749347-38749528:-@exon:chr2:38748898-38749346:-@junction:chr2:38748654-38748897:-	SRSF7	multimodal
isoform1=junction:chr2:61868707-61872081:-|isoform2=junction:chr2:61869554-61872081:-@exon:chr2:61869440-61869553:-@junction:chr2:61868707-61869439:-	CCT4	included
isoform1=junction:chr2:61885073-61888380:-|isoform2=junction:chr2:61888258-61888380:-@novel_exon:chr2:61888199-61888257:-@junction:chr2:61885073-61888198:-	CCT4	excluded
isoform1=junction:chr2:65089071-65097970:-|isoform2=junction:chr2:65091079-65097970:-@exon:chr2:65090983-65091078:-@junction:chr2:65089071-65090982:-	RAB1A	included
isoform1=junction:chr2:70224630-70227734:-|isoform2=junction:chr2:70225394-70227734:-@exon:chr2:70225328-70225393:-@junction:chr2:70224630-70225327:-	TIA1	excluded
isoform1=junction:chr2:70288193-70293617:-|isoform2=junction:chr2:70289373-70293617:-@exon:chr2:70289350-70289372:-@junction:chr2:70288193-70289349:-	SNRPG	included
isoform1=junction:chr2:73927053-73946718:+|isoform2=junction:chr2:73927053-73938909:+@exon:chr2:73938910-73939022:+@junction:chr2:73939023-73946718:+	DGUOK	multimodal
isoform1=junction:chr2:73946907-73957124:+|isoform2=junction:chr2:73946907-73950584:+@exon:chr2:73950585-73950732:+@junction:chr2:73950733-73957124:+	DGUOK	included
isoform1=junction:chr2:73946907-73958145:+|isoform2=junction:chr2:73946907-73957124:+@exon:chr2:73957125-73957240:+@junction:chr2:73957241-73958145:+	DGUOK	excluded
isoform1=junction:chr2:74472253-74472568:-|isoform2=junction:chr2:74472471-74472568:-@exon:chr2:74472358-74472470:-@junction:chr2:74472253-74472357:-	MRPL53	included
isoform1=junction:chr2:74528490-74529131:-|isoform2=junction:chr2:74528936-74529131:-@exon:chr2:74528751-74528935:-@junction:chr2:74528490-74528750:-	AUP1	included
isoform1=junction:chr2:85596650-85597103:+|isoform2=junction:chr2:85596650-85596821:+@exon:chr2:85596822-85596931:+@junction:chr2:85596932-85597103:+	RNF181	included
isoform1=junction:chr2:9474648-9478221:+|isoform2=junction:chr2:9474648-9475986:+@exon:chr2:9475987-9476039:+@junction:chr2:9476040-9478221:+	IAH1	bimodal
isoform1=junction:chr3:100341162-100346180:+|isoform2=junction:chr3:100341162-100345584:+@exon:chr3:100345585-100345678:+@junction:chr3:100345679-100346180:+	NIT2	included
isoform1=junction:chr3:100341162-100348802:+|isoform2=junction:chr3:100341162-100345584:+@exon:chr3:100345585-100346255:+@junction:chr3:100346256-100348802:+	NIT2	bimodal
isoform1=junction:chr3:100345679-100348802:+|isoform2=junction:chr3:100345679-100346180:+@exon:chr3:100346181-100346255:+@junction:chr3:100346256-100348802:+	NIT2	bimodal
isoform1=junction:chr3:108047293-108050577:-|isoform2=junction:chr3:108049652-108050577:-@exon:chr3:108049619-108049651:-@junction:chr3:108047293-108049618:-	CD47	multimodal
isoform1=junction:chr3:108047293-108051938:-|isoform2=junction:chr3:108050603-108051938:-@exon:chr3:108050578-108050602:-@junction:chr3:108047293-108050577:-	CD47	multimodal
isoform1=junction:chr3:108047293-108057476:-|isoform2=junction:chr3:108051971-108057476:-@exon:chr3:108051939-108051970:-@junction:chr3:108047293-108051938:-	CD47	multimodal
isoform1=junction:chr3:113784439-113786231:+|isoform2=junction:chr3:113784439-113784695:+@exon:chr3:113784696-113784833:+@junction:chr3:113784834-113786231:+	ATP6V1A	included
isoform1=junction:chr3:119498928-119503531:+|isoform2=junction:chr3:119498928-119500694:+@exon:chr3:119500695-119500860:+@junction:chr3:119500861-119503531:+	TIMMDC1	included
isoform1=junction:chr3:124730628-124737567:+|isoform2=junction:chr3:124730628-124735092:+@exon:chr3:124735093-124735246:+@junction:chr3:124735247-124737567:+	UMPS	included
isoform1=junction:chr3:127695191-127721052:-|isoform2=junction:chr3:127710666-127721052:-@exon:chr3:127710576-127710665:-@junction:chr3:127695191-127710575:-	MGLL	multimodal
isoform1=junction:chr3:127710666-127721052:-|isoform2=junction:chr3:127715931-127721052:-@exon:chr3:127715853-127715930:-@junction:chr3:127710666-127715852:-	MGLL	excluded
isoform1=junction:chr3:129288998-129298353:+|isoform2=junction:chr3:129288998-129290678:+@exon:chr3:129290679-129290804:+@junction:chr3:129290805-129298353:+	HMCES	included
isoform1=junction:chr3:141738517-141745158:+|isoform2=junction:chr3:141738517-141743508:+@exon:chr3:141743509-141743556:+@junction:chr3:141743557-141745158:+	RNF7	included
isoform1=junction:chr3:146517168-146525604:-|isoform2=junction:chr3:146522054-146525604:-@exon:chr3:146521544-146522053:-@junction:chr3:146517168-146521543:-	PLSCR1	bimodal
isoform1=junction:chr3:146525648-146533469:-|isoform2=junction:chr3:146528832-146533469:-@exon:chr3:146528614-146528831:-@junction:chr3:146525648-146528613:-	PLSCR1	multimodal
isoform1=junction:chr3:149009403-149026759:+|isoform2=junction:chr3:149009403-149024052:+@exon:chr3:149024053-149024272:+@junction:chr3:149024273-149026759:+	GYG1	bimodal
isoform1=junction:chr3:149371868-149375679:-|isoform2=junction:chr3:149375589-149375679:-@exon:chr3:149375443-149375588:-@junction:chr3:149371868-149375442:-	TM4SF1	included
isoform1=junction:chr3:150544499-150546051:-|isoform2=junction:chr3:150545779-150546051:-@exon:chr3:150545703-150545778:-@junction:chr3:150544499-150545702:-	SERP1	included
isoform1=junction:chr3:157150382-157152176:-|isoform2=junction:chr3:157151931-157152176:-@exon:chr3:157151729-157151930:-@junction:chr3:157150382-157151728:-	CCNL1	bimodal
isoform1=junction:chr3:157150382-157152176:-|isoform2=junction:chr3:157151931-157152176:-@exon:chr3:157151917-157151930:-@junction:chr3:157150382-157151916:-	CCNL1	excluded
isoform1=junction:chr3:158704928-158713796:-|isoform2=junction:chr3:158710934-158713796:-@exon:chr3:158710738-158710933:-@junction:chr3:158704928-158710737:-	RARRES1	included
isoform1=junction:chr3:161346356-161359801:-|isoform2=junction:chr3:161348104-161359801:-@exon:chr3:161347965-161348103:-@junction:chr3:161346356-161347964:-	SPTSSB	multimodal
isoform1=junction:chr3:172509322-172514860:-|isoform2=junction:chr3:172511660-172514860:-@exon:chr3:172511617-172511659:-@junction:chr3:172509322-172511616:-	TNFSF10	included
isoform1=junction:chr3:172759070-172761609:+|isoform2=junction:chr3:172759070-172760155:+@exon:chr3:172760156-172760263:+@junction:chr3:172760264-172761609:+	ECT2	included
isoform1=junction:chr3:179574468-179576216:+|isoform2=junction:chr3:179574468-179575402:+@exon:chr3:179575403-179575504:+@junction:chr3:179575505-179576216:+	ACTL6A	excluded
isoform1=junction:chr3:179615060-179615982:+|isoform2=junction:chr3:179615060-179615555:+@exon:chr3:179615556-179615615:+@junction:chr3:179615616-179615982:+	NDUFB5	excluded
isoform1=junction:chr3:184180252-184180848:+|isoform2=junction:chr3:184180252-184180644:+@exon:chr3:184180645-184180650:+@junction:chr3:184180651-184180848:+	AP2M1	multimodal
[truncated: 166 more rows]

## Sheet: SRP133387_CTCclusters
ASE_ID	Gene_Symbol	Modality
[truncated: 590 more rows]

## Sheet: SRP066632_SingleCTCs
ASE_ID	Gene_Symbol	Modality
[truncated: 1,047 more rows]

## Sheet: SRP186111_CTCclusters
ASE_ID	Gene_Symbol	Modality
[truncated: 906 more rows]
