# Supplementary material for: Specific alternative splicing and polyadenylation facilitate metastasis mediated by CTC clusters
Source: Research Square preprint supplement (doi:10.21203/rs.3.rs-1128296/v1), 2021-12-07
Supplement: Supplementary file 8 [file ecf4f7424e212951e20fc205.xlsx]

## Sheet: SRP131647_SingleCTCs
Table S6. Cell cycle status of single CTCs and CTC clusters
Sample ID	Cell cycle phase
SAMN08427406	G1
SAMN08427424	G2M
SAMN08427425	G2M
SAMN08427434	G1
SAMN08427436	G1
SAMN08427444	G1
SAMN08427445	G1
SAMN08427448	G1
SAMN08427449	G1
SAMN08427462	G1
SAMN08427466	G1
SAMN08427467	S
SAMN08427469	S
SAMN08427470	S
SAMN08427479	G1
SAMN08427480	G1
SAMN08427481	G1
SAMN08427483	G1
SAMN08427484	G1
SAMN08427502	S
SAMN08427503	G1
SAMN08427504	G1
SAMN08427508	S
SAMN08427509	G2M
SAMN08427510	G1
SAMN08427519	G1
SAMN08427526	S
SAMN08427529	G2M
SAMN08427531	G1
SAMN08427532	G1
SAMN08427535	G1
SAMN08427536	G1
SAMN08427538	G1
SAMN08427539	G1
SAMN08427540	G1
SAMN08427541	G1
SAMN08427543	G1
SAMN08427544	G1
SAMN08427545	G1
SAMN08427546	G1
SAMN08427547	G1
SAMN08427548	G1
SAMN08427552	G1
SAMN08427556	G1
SAMN08427558	G2M
SAMN08427560	G1
SAMN08427562	S
SAMN08427563	S
SAMN08427568	G1
SAMN08427569	S
SAMN08427575	G1
SAMN08427576	G2M
SAMN08427578	S
SAMN08427581	G1
SAMN08427582	G1
SAMN08427584	G1
SAMN08427613	G1
SAMN08427614	G2M
SAMN08427615	G2M
SAMN08427616	G1
SAMN08427617	G1
SAMN08427619	G1
SAMN08427620	G1
SAMN08427621	G1
SAMN08427625	G2M
SAMN08427639	G1
SAMN08427640	S
SAMN08427641	G2M
SAMN08427659	G2M
SAMN08427663	S
SAMN08427665	G1
SAMN08427672	G1
SAMN08427677	G1
SAMN08427685	G1
SAMN08427687	G2M
SAMN08427689	S
SAMN08427693	S
SAMN08427699	G1
SAMN08427703	G1
SAMN08427707	S
SAMN08427789	G1
SAMN08427846	G1
SAMN11093737	G1
SAMN11093782	G1
SAMN11093786	G1
SAMN11093797	G1
SAMN11093799	S
SAMN11093803	G1
SAMN11093805	G1
SAMN11093819	G1
SAMN11093820	G1
SAMN11093821	G1

## Sheet: SRP131647_CTCclusters
Sample ID	Cell cycle phase
SAMN08427402	G1
SAMN08427407	G1
SAMN08427408	G1
SAMN08427411	G1
SAMN08427412	G1
SAMN08427421	G1
SAMN08427426	G2M
SAMN08427427	G1
SAMN08427429	S
SAMN08427431	G1
SAMN08427432	S
SAMN08427433	G1
SAMN08427435	G1
SAMN08427437	S
SAMN08427438	G2M
SAMN08427443	S
SAMN08427446	S
SAMN08427447	S
SAMN08427454	G1
SAMN08427472	G1
SAMN08427478	G1
SAMN08427482	G1
SAMN08427500	G1
SAMN08427506	G2M
SAMN08427507	G2M
SAMN08427512	G2M
SAMN08427513	G1
SAMN08427514	G1
SAMN08427516	G1
SAMN08427517	S
SAMN08427518	G2M
SAMN08427520	G2M
SAMN08427521	S
SAMN08427522	G2M
SAMN08427524	G2M
SAMN08427528	S
SAMN08427542	G1
SAMN08427549	G1
SAMN08427550	G1
SAMN08427551	G1
SAMN08427557	G1
SAMN08427559	G1
SAMN08427561	G1
SAMN08427564	G1
SAMN08427567	G2M
SAMN08427577	S
SAMN08427579	G2M
SAMN08427580	G1
SAMN08427585	G2M
SAMN08427588	G1
SAMN08427589	G2M
SAMN08427590	G1
SAMN08427591	G2M
SAMN08427618	G2M
SAMN08427622	G1
SAMN08427626	G1
SAMN08427628	G1
SAMN08427629	G1
SAMN08427631	G2M
SAMN08427637	G1
SAMN08427642	S
SAMN08427649	G2M
SAMN08427658	G2M
SAMN08427661	G2M
SAMN08427678	G1
SAMN08427679	G1
SAMN08427686	G1
SAMN08427688	G1
SAMN08427694	G1
SAMN08427696	G1
SAMN08427697	G1
SAMN08427698	G1
SAMN08427700	S
SAMN08427705	G1
SAMN08427787	G1
SAMN08427788	G1
SAMN08427790	G1
SAMN08427842	G1
SAMN11093787	G1
SAMN11093789	G1
SAMN11093795	G1
SAMN11093818	G1

## Sheet: SRP133387_SingleCTCs
Sample ID	Cell cycle phase
SAMN08595656	G1
SAMN08595657	G1
SAMN08595658	G1
SAMN08595659	G1
SAMN08595663	G1
SAMN08595664	S
SAMN08595666	G1
SAMN08595669	G1
SAMN08595671	G1
SAMN08595673	G1
SAMN08595676	G1
SAMN08595678	G2M
SAMN08595680	G1
SAMN08595682	G1
SAMN08595684	S
SAMN08595686	G1
SAMN08595691	S
SAMN08595692	G1
SAMN08595693	G1
SAMN08595697	S
SAMN08595698	G2M
SAMN08595699	G1
SAMN08595710	G1
SAMN08595712	S
SAMN08595715	S
SAMN08595723	G1
SAMN08595734	G2M
SAMN08595735	G2M
SAMN08595743	G1
SAMN08595747	G2M
SAMN08595749	S
SAMN08595752	G1
SAMN08595753	G1
SAMN08595755	G1
SAMN08595762	S
SAMN08595763	S
SAMN08595769	G1
SAMN08595770	G1
SAMN08595771	G1
SAMN08595773	G1
SAMN08595774	G1
SAMN08595777	G1
SAMN08595784	G1
SAMN08595786	S
SAMN08595790	G1
SAMN08595792	G1
SAMN08595796	S
SAMN08595798	G1
SAMN08595799	G1
SAMN08595800	G1
SAMN08595801	G1
SAMN08595802	G1
SAMN08595803	G1
SAMN08595804	G1
SAMN08595806	G1
SAMN08595807	G1
SAMN08595808	G1
SAMN08595809	G1
SAMN08595811	G1
SAMN08595812	G1
SAMN08595816	G1
SAMN08595817	G1
SAMN08595822	G2M
SAMN08595823	G1
SAMN08595824	S
SAMN08595837	G2M

## Sheet: SRP133387_CTCclusters
Sample ID	Cell cycle phase
SAMN08595655	G1
SAMN08595660	G1
SAMN08595667	G1
SAMN08595668	G1
SAMN08595670	G1
SAMN08595674	G1
SAMN08595675	G1
SAMN08595677	G1
SAMN08595679	G1
SAMN08595683	G1
SAMN08595685	G1
SAMN08595687	G2M
SAMN08595688	G1
SAMN08595695	G2M
SAMN08595696	G2M
SAMN08595700	G2M
SAMN08595701	G1
SAMN08595702	G1
SAMN08595704	G1
SAMN08595705	S
SAMN08595706	S
SAMN08595707	G2M
SAMN08595708	G2M
SAMN08595709	G2M
SAMN08595711	G2M
SAMN08595714	S
SAMN08595721	G2M
SAMN08595736	G2M
SAMN08595737	G1
SAMN08595739	S
SAMN08595740	G1
SAMN08595741	S
SAMN08595742	G1
SAMN08595744	S
SAMN08595745	G2M
SAMN08595748	S
SAMN08595750	G2M
SAMN08595751	G1
SAMN08595756	G2M
SAMN08595758	G1
SAMN08595759	G2M
SAMN08595760	G1
SAMN08595765	G1
SAMN08595768	G1
SAMN08595772	G1
SAMN08595778	G1
SAMN08595779	G1
SAMN08595780	G1
SAMN08595781	G1
SAMN08595791	S
SAMN08595793	G1
SAMN08595794	G1
SAMN08595795	G1
SAMN08595797	G1
SAMN08595805	G1
SAMN08595813	S
SAMN08595814	G1
SAMN08595815	S
SAMN08595818	S
SAMN08595819	G1
SAMN08595821	G1
SAMN08595825	S
SAMN08595827	G2M
SAMN08595836	G2M

## Sheet: SRP066632_SingleCTCs
Sample ID	Cell cycle phase
SAMN04293461	G1
SAMN04293463	G1
SAMN04293464	G1
SAMN04293465	G1
SAMN04293466	G1
SAMN04293469	S
SAMN04293470	G1
SAMN04293475	G1
SAMN04293477	G2M
SAMN04293478	G1
SAMN04293479	G1
SAMN04293480	G1
SAMN04293481	G1
SAMN04293482	G1
SAMN04293483	S
SAMN04293484	G1
SAMN04293485	G1
SAMN05210282	G2M
SAMN05210283	G1
SAMN05210284	S
SAMN05210286	G2M
SAMN05210287	G1
SAMN05210292	G1
SAMN05210293	S
SAMN05210295	S
SAMN05210298	G1
SAMN05210299	G1
SAMN05210301	G1
SAMN05210304	G1
SAMN05210312	G1
SAMN05210313	G1
SAMN05210314	G1
SAMN05210316	G1
SAMN05210319	G1
SAMN05210320	G1
SAMN05210321	G1
SAMN05210322	G1
SAMN05210326	G1
SAMN05210327	G1
SAMN05210328	S
SAMN05210330	S

## Sheet: SRP186111_CTCclusters
Sample ID	Cell cycle phase
SAMN10959519	G1
SAMN10959520	G1
SRR8585565	G1
SRR8585566	S
SRR8585567	G1
SRR8585568	G1
SRR8585569	G1
SRR8585570	G1
SRR8585571	G1
SRR8585572	G2M
SRR8585573	G1
SRR8585574	G2M
SRR8585575	G2M
SRR8585576	G1
SRR8585577	G1
SRR8585578	G1
SRR8585579	G1
SRR8585580	G1
SRR8585581	G1
SRR8585582	G2M
SRR8585583	G2M
SRR8585584	S
SRR8585585	G1
SRR8585586	G1
SRR8585587	G1
SRR8585588	G1
SRR8585589	G1
SRR8585590	G1
SRR8585591	G1
SRR8585592	G1
SRR8585593	G1
