# Supplementary material for: Specific alternative splicing and polyadenylation facilitate metastasis mediated by CTC clusters
Source: Research Square preprint supplement (doi:10.21203/rs.3.rs-1128296/v1), 2021-12-07
Supplement: Supplementary file 9 [file fb37c7dff212ea7d8b97ff2f.xlsx]

## Sheet: 22_core_APA_factor
Table S5. Twenty-two core APA factors collected from other study
Gene_Symbol	Type
CPSF1	CPSF
CPSF2	CPSF
CPSF3	CPSF
CPSF4	CPSF
FIP1L1	CPSF
CSTF3	CstF
CSTF2	CstF
CSTF1	CstF
CPSF6	CF Im
CPSF7	CF Im
NUDT21	CF Im
PCF11	CF IIm
SYMPK	Others
PAPOLG	Others
PABPC1	Others
PABPC4	Others
PABPN1	Others
CSTF2T	Homologs
WDR33	Homologs
RBBP6	Homologs
PPP1CA	Homologs
PPP1CB	Homologs
